# Supplementary material for: The proteomic landscape of sperm surface deciphers its maturational and functional aspects in buffalo
Source: Front Physiol. 2024 Jun 28;15:1413817. doi: 10.3389/fphys.2024.1413817 (PMC11239549; doi:10.3389/fphys.2024.1413817)
Supplement: Supplementary file 5 [file Table1.XLSX]

## Sheet: Salt
Accession	Description	Gene Name	Abundance Ratio (log2): (2x30, Sample) / (1x30, Sample)	Sum PEP Score	Coverage [%]	# Peptides	# PSMs	# Unique Peptides	# Protein Groups	# AAs	MW [kDa]	calc. pI
XP_025134254	intestinal-type alkaline phosphatase	LOC102403548	-5.41	2.274	2	1	3	1	1	546	58.2	5.49
XP_025120226	intestinal-type alkaline phosphatase-like	LOC102397502	-5.41	2.274	2	1	3	1	1	378	41.8	6.23
XP_025134253	intestinal-type alkaline phosphatase-like	LOC102397824	-5.41	2.274	2	1	3	1	1	566	61	6.07
XP_006041928	nucleolin	NCL	-3.96	18.513	3	1	4	1	1	720	77.8	4.7
XP_025127592	cofilin-2	CFL2	-3.89	3.296	7	1	3	1	1	166	18.7	7.88
XP_006042203	protein phosphatase Slingshot homolog 2 isoform X3	SSH2	-3.59	1.751	0	1	2	1	1	1409	156.1	5.47
XP_025136741	protein phosphatase Slingshot homolog 2 isoform X1	SSH2.1	-3.59	1.751	0	1	2	1	1	1429	158.3	5.27
XP_025136743	protein phosphatase Slingshot homolog 2 isoform X4	SSH2.2	-3.59	1.751	0	1	2	1	1	1402	155.3	5.4
XP_025136742	protein phosphatase Slingshot homolog 2 isoform X2	SSH2.3	-3.59	1.751	0	1	2	1	1	1428	158.2	5.27
XP_025136744	protein phosphatase Slingshot homolog 2 isoform X5	SSH2.4	-3.59	1.751	1	1	2	1	1	1374	152.6	5.48
XP_025136745	protein phosphatase Slingshot homolog 2 isoform X6	SSH2.5	-3.59	1.751	1	1	2	1	1	1227	135.6	5.12
XP_006077255	aminoacyl tRNA synthase complex-interacting multifunctional protein 1 isoform X2	AIMP1	-3.37	4.003	6	1	1	1	1	322	35.4	8.63
XP_006077256	aminoacyl tRNA synthase complex-interacting multifunctional protein 1 isoform X3	AIMP1.1	-3.37	4.003	6	1	1	1	1	288	31.4	8.51
XP_006077254	aminoacyl tRNA synthase complex-interacting multifunctional protein 1 isoform X1	AIMP1.2	-3.37	4.003	6	1	1	1	1	326	35.8	8.75
XP_006057549	mitochondria-eating protein isoform X1	SPATA18	-3.21	29.846	9	3	7	3	1	549	62	8.82
XP_006078222	60 kDa heat shock protein, mitochondrial	HSPD1	-3.15	74.498	15	5	44	5	1	573	60.9	5.87
XP_006065613	testis-specific serine/threonine-protein kinase 1	TSSK1B	-3.1	9.784	4	1	5	1	1	367	41.5	7.21
XP_006072656	cilia- and flagella-associated protein 20	CFAP20	-3.02	1.759	4	1	2	1	1	193	22.7	9.76
NP_001277811	fatty acid-binding protein, heart	FABP3	-2.97	2.153	7	1	1	1	1	133	14.8	7.34
XP_006061147	trans-Golgi network integral membrane protein 2	TGOLN2	-2.9	9.481	9	2	3	2	1	306	32.9	5.6
XP_006075221	calcium-binding tyrosine phosphorylation-regulated protein isoform X2	CABYR	-2.77	5.174	8	1	4	1	1	382	41.4	7.11
XP_006076181	LOW QUALITY PROTEIN: tumor necrosis factor receptor superfamily member 21	TNFRSF21	-2.72	4.062	2	1	2	1	1	652	71.3	7.83
XP_006060517	dynein intermediate chain 1, axonemal	DNAI1	-2.43	7.037	5	2	3	2	1	701	79.8	6.61
XP_025123304	BICD family-like cargo adapter 1 isoform X5	BICDL1	-2.43	1.332	1	1	2	1	1	500	56.4	4.74
XP_025123301	BICD family-like cargo adapter 1 isoform X3	BICDL1.1	-2.43	1.332	1	1	2	1	1	580	65.5	4.96
XP_025123302	BICD family-like cargo adapter 1 isoform X4	BICDL1.2	-2.43	1.332	1	1	2	1	1	576	65	4.97
XP_006053035	BICD family-like cargo adapter 1 isoform X2	BICDL1.3	-2.43	1.332	1	1	2	1	1	624	70.7	4.98
XP_025123300	BICD family-like cargo adapter 1 isoform X1	BICDL1.4	-2.43	1.332	1	1	2	1	1	628	71.2	4.97
XP_006062024	prohibitin	PHB	-2.41	22.595	29	3	5	3	1	272	29.8	5.76
XP_006076125	programmed cell death 6-interacting protein isoform X2	PDCD6IP	-2.37	12.017	8	3	5	3	1	875	97	6.64
XP_006076126	programmed cell death 6-interacting protein isoform X1	PDCD6IP.1	-2.37	12.017	8	3	5	3	1	880	97.7	6.64
XP_006067447	spondin-2 isoform X2	SPON2	-2.34	5.198	9	1	1	1	1	273	29.4	7.71
XP_006067446	spondin-2 isoform X1	SPON2.1	-2.34	5.198	8	1	1	1	1	332	35.9	6.3
XP_006059160	heterogeneous nuclear ribonucleoprotein K isoform X1	HNRNPK	-2.29	12.989	4	1	6	1	1	464	51	5.26
XP_006059161	heterogeneous nuclear ribonucleoprotein K isoform X2	HNRNPK.1	-2.29	12.989	4	1	6	1	1	463	50.9	5.47
XP_025137738	heterogeneous nuclear ribonucleoprotein K isoform X3	HNRNPK.2	-2.29	12.989	4	1	6	1	1	459	50.4	5.33
XP_006059162	heterogeneous nuclear ribonucleoprotein K isoform X4	HNRNPK.3	-2.29	12.989	4	1	6	1	1	440	48.5	5.45
XP_025137739	heterogeneous nuclear ribonucleoprotein K isoform X5	HNRNPK.4	-2.29	12.989	4	1	6	1	1	439	48.5	5.78
XP_006078184	beta-defensin 107A-like	LOC102394138	-2.29	2.64	13	1	3	1	1	70	8	8.76
XP_025142334	testis-expressed protein 54-like	LOC112585202	-2.26	4.65	18	2	3	2	1	90	10.3	5.6
XP_006064624	lisH domain and HEAT repeat-containing protein KIAA1468 homolog isoform X4	RELCH	-2.2	2.983	2	1	1	1	1	1212	134	5.34
XP_006064622	lisH domain and HEAT repeat-containing protein KIAA1468 homolog isoform X2	RELCH.1	-2.2	2.983	2	1	1	1	1	1220	135	5.39
XP_006064626	lisH domain and HEAT repeat-containing protein KIAA1468 homolog isoform X6	RELCH.2	-2.2	2.983	2	1	1	1	1	1188	131.2	5.29
XP_006064621	lisH domain and HEAT repeat-containing protein KIAA1468 homolog isoform X1	RELCH.3	-2.2	2.983	2	1	1	1	1	1220	134.9	5.39
XP_006064625	lisH domain and HEAT repeat-containing protein KIAA1468 homolog isoform X5	RELCH.4	-2.2	2.983	2	1	1	1	1	1196	132.2	5.33
XP_006064627	lisH domain and HEAT repeat-containing protein KIAA1468 homolog isoform X8	RELCH.5	-2.2	2.983	2	1	1	1	1	1047	115.6	5.36
XP_025128982	lisH domain and HEAT repeat-containing protein KIAA1468 homolog isoform X7	RELCH.6	-2.2	2.983	2	1	1	1	1	1146	126.7	5.43
XP_006064623	lisH domain and HEAT repeat-containing protein KIAA1468 homolog isoform X3	RELCH.7	-2.2	2.983	2	1	1	1	1	1212	133.9	5.34
XP_006048079	LOW QUALITY PROTEIN: histone H3.1	LOC102413645	-2.18	59.605	44	5	22	2	1	136	15.4	11.12
XP_025149877	histone H3.1	LOC102412183	-2.18	59.605	31	5	22	2	1	191	21.4	10.73
XP_025129158	histone H3.3-like	LOC102389804	-2.18	51.934	29	2	15	2	1	115	13.2	9.8
XP_006064799	ecto-ADP-ribosyltransferase 5 isoform X1	LOC102398195	-2.16	2.043	2	1	5	0	2	333	36.7	8.51
XP_006064801	ecto-ADP-ribosyltransferase 5 isoform X2	LOC102398195.1	-2.16	2.043	2	1	5	0	2	332	36.7	8.66
XP_025143731	LOW QUALITY PROTEIN: histone H3-like	LOC102414060	-2.11	61.012	44	5	19	2	1	136	15.4	11.27
XP_006049258	uncharacterized protein LOC102411789	LOC102411789	-2.11	61.012	30	5	19	2	1	397	44.2	11.11
XP_025126466	brain acid soluble protein 1 isoform X1	BASP1	-2	28.627	36	5	23	5	1	232	23.6	4.63
XP_025131636	brain acid soluble protein 1	LOC112582018	-2	28.627	37	5	23	5	1	227	23	4.6
XP_025126467	brain acid soluble protein 1 isoform X2	BASP1.1	-2	28.627	37	5	23	5	1	227	23.1	4.6
XP_025123309	disintegrin and metalloproteinase domain-containing protein 1	LOC102394973	-2	12.13	4	2	9	2	1	826	90.9	4.86
XP_006041029	sperm acrosome membrane-associated protein 4	SPACA4	-1.99	8.545	18	1	4	1	1	126	13	6
XP_006064763	folate receptor beta isoform X1	FOLR2	-1.92	11.476	6	2	18	1	1	286	33	7.17
XP_006064764	folate receptor beta isoform X2	FOLR2.1	-1.92	11.476	7	2	18	1	1	253	29.3	7.64
XP_006064766	folate receptor beta isoform X3	FOLR2.2	-1.92	11.476	7	2	18	1	1	249	28.8	7.81
XP_006067549	LOW QUALITY PROTEIN: radial spoke head protein 6 homolog A	RSPH6A	-1.91	8.399	3	1	3	1	1	719	81.4	4.39
XP_006077629	LOW QUALITY PROTEIN: axonemal dynein light intermediate polypeptide 1	DNALI1	-1.84	2.765	3	1	3	1	1	280	31.9	8.68
XP_025127145	fibrous sheath CABYR-binding protein	FSCB	-1.8	7.503	4	2	8	2	1	747	80.2	4.06
XP_006050778	beta-defensin 110 isoform X7	LOC102395067	-1.78	4.752	16	1	3	1	1	69	8.1	9.63
XP_006046658	keratin, type II cytoskeletal 2 epidermal isoform X1	KRT2	-1.76	3.282	2	1	1	1	1	617	64.3	8.22
XP_025138245	keratin, type II cytoskeletal 2 epidermal isoform X2	KRT2.1	-1.76	3.282	2	1	1	1	1	612	63.9	8.22
XP_006043080	calmodulin-like	LOC102393421	-1.74	3.953	5	1	18	1	1	149	16.8	4.27
XP_006048328	calmodulin-like	LOC102403292	-1.74	3.953	5	1	18	1	1	148	16.8	4.39
XP_006051414	troponin C, skeletal muscle	TNNC2	-1.74	3.953	4	1	18	1	1	161	18.2	4.2
XP_025119160	spleen trypsin inhibitor I	LOC102392354	-1.72	6.053	7	1	35	1	1	98	10.6	8.31
XP_025129709	LOW QUALITY PROTEIN: deleted in malignant brain tumors 1 protein	DMBT1	-1.71	25.938	19	4	37	4	1	3206	344.2	5.22
XP_025134009	LOW QUALITY PROTEIN: disintegrin and metalloproteinase domain-containing protein 5	LOC102404621	-1.68	5.448	2	1	2	1	1	750	83.5	6.74
XP_025129120	calcium-binding tyrosine phosphorylation-regulated protein isoform X1	CABYR.1	-1.67	8.812	9	2	11	2	1	454	48.7	4.89
XP_006054375	cytosolic 5'-nucleotidase 1B isoform X2	LOC102406031	-1.63	42.468	11	6	39	6	1	564	64	8.51
XP_025132121	cancer/testis antigen 47A	LOC102397898	-1.63	15.139	17	2	7	2	1	253	26.9	4.5
XP_006074767	inositol monophosphatase 1 isoform X1	IMPA1.1	-1.6	20.599	10	2	31	2	1	278	30.2	5.17
XP_006074768	inositol monophosphatase 1 isoform X2	IMPA1	-1.6	20.599	10	2	31	2	1	277	30	5.17
XP_006063378	Golgi apparatus protein 1	GLG1	-1.58	4.943	1	1	1	1	1	1186	134.8	6.86
XP_006075049	ATP synthase subunit beta, mitochondrial	ATP5F1B	-1.54	20.127	5	1	9	1	1	528	56.3	5.27
XP_006065862	glyceraldehyde-3-phosphate dehydrogenase	GAPDH	-1.53	13.223	10	2	16	1	1	333	35.9	8.35
XP_025119232	lethal(3)malignant brain tumor-like protein 1 isoform X3	L3MBTL1	-1.53	1.312	1	1	1	1	1	864	94.6	6.25
XP_006070235	nucleoside diphosphate kinase A 2	LOC102415514	-1.49	8.338	9	1	2	1	1	152	17.3	7.99
XP_006073988	G-protein coupled receptor family C group 5 member B	GPRC5B	-1.48	5.659	3	1	2	1	1	387	43.1	7.62
XP_025116735	protein phosphatase 1B isoform X4	PPM1B	-1.43	2.376	10	1	1	1	1	192	20.9	4.82
XP_025116734	protein phosphatase 1B isoform X2	PPM1B	-1.43	2.376	5	1	1	1	1	392	43.5	5.24
XP_006056871	protein phosphatase 1B isoform X1	PPM1B	-1.43	2.376	4	1	1	1	1	479	52.7	5.08
XP_006056872	protein phosphatase 1B isoform X3	PPM1B	-1.43	2.376	5	1	1	1	1	387	42.8	5.2
XP_025117313	cytosolic 5'-nucleotidase 1B isoform X1	LOC102406031	-1.41	37.197	8	5	34	5	1	625	71.1	8.85
XP_006058332	furin	FURIN	-1.41	23.643	10	4	13	4	1	797	87.4	6.64
XP_025130476	calcium-regulated heat-stable protein 1	CARHSP1	-1.41	3.66	8	1	4	1	1	147	15.9	7.87
XP_006064768	folate receptor alpha isoform X1	LOC102390454	-1.4	17.379	16	4	11	3	1	267	30.8	7.65
XP_025122246	folate receptor alpha isoform X2	LOC102390454.1	-1.4	17.379	17	4	11	3	1	251	29.1	7.65
XP_006061689	E3 ubiquitin-protein ligase PPP1R11 isoform X1	PPP1R11	-1.39	6.434	21	1	2	1	1	126	13.9	6.77
XP_006061690	E3 ubiquitin-protein ligase PPP1R11 isoform X2	PPP1R11.1	-1.39	6.434	25	1	2	1	1	107	12	8.12
XP_025119719	tyrosine-protein phosphatase non-receptor type substrate 1 isoform X4	SIRPA	-1.38	11.346	5	1	7	1	1	526	56.4	9
XP_006042105	tyrosine-protein phosphatase non-receptor type substrate 1 isoform X1	SIRPA.1	-1.38	11.346	4	1	7	1	1	587	63.2	8.97
XP_006045491	tyrosine-protein phosphatase non-receptor type substrate 1-like	LOC102396916	-1.38	11.346	6	1	7	1	1	393	42.5	7.31
XP_006042111	tyrosine-protein phosphatase non-receptor type substrate 1 isoform X5	SIRPA.2	-1.38	11.346	5	1	7	1	1	510	55.2	7.03
XP_025119717	tyrosine-protein phosphatase non-receptor type substrate 1 isoform X2	SIRPA.3	-1.38	11.346	4	1	7	1	1	583	62.7	8.97
XP_025119721	tyrosine-protein phosphatase non-receptor type substrate 1 isoform X6	SIRPA.4	-1.38	11.346	5	1	7	1	1	505	54.8	7.11
XP_025119718	tyrosine-protein phosphatase non-receptor type substrate 1 isoform X3	SIRPA.5	-1.38	11.346	4	1	7	1	1	541	58.3	7.88
XP_006063589	heterogeneous nuclear ribonucleoprotein U isoform X1	HNRNPU	-1.37	7.883	3	1	2	1	1	825	90.4	6
XP_006063591	heterogeneous nuclear ribonucleoprotein U isoform X2	HNRNPU.1	-1.37	7.883	3	1	2	1	1	806	88.8	5.78
XP_025137114	disintegrin and metalloproteinase domain-containing protein 20-like	LOC112583832	-1.36	23.737	6	4	23	1	1	762	86	7.34
XP_025121742	calcitonin receptor-stimulating peptide 2	LOC102407248	-1.35	7.101	18	2	3	2	1	125	14.3	9.47
XP_025124399	beta-defensin 112 isoform X3	LOC102395067.1	-1.29	11.845	19	3	14	3	1	121	13.8	8.78
XP_006061199	cartilage acidic protein 1 isoform X1	CRTAC1	-1.29	11.79	3	2	4	2	1	645	70.3	5.24
XP_025129676	cartilage acidic protein 1 isoform X3	CRTAC1.1	-1.29	11.79	4	2	4	2	1	616	67.3	5.2
XP_025129675	cartilage acidic protein 1 isoform X2	CRTAC1.2	-1.29	11.79	4	2	4	2	1	622	67.9	5.2
XP_006064946	LOW QUALITY PROTEIN: abnormal spindle-like microcephaly-associated protein	ASPM	-1.29	1.278	1	1	4	1	1	3460	405.3	11.06
XP_025137756	Golgi membrane protein 1	GOLM1	-1.27	23.492	13	3	19	3	1	405	45.5	4.84
XP_025128642	cullin-associated NEDD8-dissociated protein 2	CAND2	-1.27	2.802	1	1	1	1	1	1236	134.7	5.63
XP_006053538	cullin-associated NEDD8-dissociated protein 1	CAND1	-1.27	2.802	1	1	1	1	1	1230	136.3	5.78
XP_006075642	olfactory receptor 4K14-like	LOC102406886	-1.27	1.308	2	1	3	1	1	318	35.8	8.46
XP_025149964	olfactory receptor 10H3-like	LOC102406582	-1.27	1.308	2	1	3	1	1	324	36.6	8.69
XP_006062470	LOW QUALITY PROTEIN: olfactory receptor 4K3-like	LOC102391458	-1.27	1.308	2	1	3	1	1	312	35.2	8.05
XP_025152313	olfactory receptor 4K3-like	LOC102391114	-1.27	1.308	2	1	3	1	1	303	34.2	7.94
XP_025144496	low-density lipoprotein receptor-related protein 8 isoform X10	LRP8	-1.21	3.542	1	1	2	1	1	939	103.1	5.06
XP_025144492	low-density lipoprotein receptor-related protein 8 isoform X6	LRP8.1	-1.21	3.542	1	1	2	1	1	898	98.4	5.07
XP_025144490	low-density lipoprotein receptor-related protein 8 isoform X4	LRP8.2	-1.21	3.542	1	1	2	1	1	957	105	5.08
XP_025144487	low-density lipoprotein receptor-related protein 8 isoform X1	LRP8.3	-1.21	3.542	1	1	2	1	1	1011	111.3	5.17
XP_025144491	low-density lipoprotein receptor-related protein 8 isoform X5	LRP8.4	-1.21	3.542	1	1	2	1	1	952	104.8	5.17
XP_025144488	low-density lipoprotein receptor-related protein 8 isoform X2	LRP8.5	-1.21	3.542	1	1	2	1	1	998	109.7	5.07
XP_025144489	low-density lipoprotein receptor-related protein 8 isoform X3	LRP8.6	-1.21	3.542	1	1	2	1	1	966	106.2	5.24
XP_006058426	serine protease inhibitor Kazal-type 2 isoform X2	LOC102397733	-1.19	33.775	47	2	34	2	1	76	8.3	7.71
XP_025141130	membrane cofactor protein isoform X11	CD46	-1.19	20.536	14	3	10	3	1	420	45.5	6.61
XP_025141141	membrane cofactor protein isoform X18	CD46.1	-1.19	20.536	15	3	10	3	1	399	44.4	7.4
XP_025141144	membrane cofactor protein isoform X21	CD46.2	-1.19	20.536	16	3	10	3	1	383	41.4	6.61
XP_025141120	membrane cofactor protein isoform X2	CD46.3	-1.19	20.536	14	3	10	3	1	442	48.7	7.62
XP_025141148	membrane cofactor protein isoform X24	CD46.4	-1.19	20.536	16	3	10	3	1	369	40	6.29
XP_025141140	membrane cofactor protein isoform X17	CD46.5	-1.19	20.536	15	3	10	3	1	400	43.2	6.8
XP_025141119	membrane cofactor protein isoform X1	CD46.6	-1.19	20.536	13	3	10	3	1	456	50.2	7.77
XP_025141136	membrane cofactor protein isoform X15	CD46.7	-1.19	20.536	15	3	10	3	1	403	43.7	7.58
XP_025141150	membrane cofactor protein isoform X26	CD46.8	-1.19	20.536	16	3	10	3	1	364	39.9	7.36
XP_025141151	membrane cofactor protein isoform X27	CD46.9	-1.19	20.536	17	3	10	3	1	363	39.9	6.89
XP_025141122	membrane cofactor protein isoform X4	CD46.10	-1.19	20.536	14	3	10	3	1	434	47	6.86
XP_025141124	membrane cofactor protein isoform X5	CD46.11	-1.19	20.536	14	3	10	3	1	429	46.8	6.68
XP_025141149	membrane cofactor protein isoform X25	CD46.12	-1.19	20.536	16	3	10	3	1	364	39.8	6.51
XP_025141121	membrane cofactor protein isoform X3	CD46.13	-1.19	20.536	14	3	10	3	1	442	48.7	7.62
XP_025141146	membrane cofactor protein isoform X22	CD46.14	-1.19	20.536	16	3	10	3	1	377	41.2	6.15
XP_025141135	membrane cofactor protein isoform X14	CD46.15	-1.19	20.536	15	3	10	3	1	406	44.1	6.3
XP_025141126	membrane cofactor protein isoform X7	CD46.16	-1.19	20.536	14	3	10	3	1	424	46.3	6.68
XP_025141125	membrane cofactor protein isoform X6	CD46.17	-1.19	20.536	14	3	10	3	1	428	47.2	7.42
XP_025141127	membrane cofactor protein isoform X8	CD46.18	-1.19	20.536	14	3	10	3	1	421	45.6	7.21
XP_025141132	membrane cofactor protein isoform X13	CD46.19	-1.19	20.536	15	3	10	3	1	407	44.2	6.95
XP_025141128	membrane cofactor protein isoform X9	CD46.20	-1.19	20.536	14	3	10	3	1	421	45.7	7.74
XP_025141129	membrane cofactor protein isoform X10	CD46.21	-1.19	20.536	14	3	10	3	1	420	45.7	7.43
XP_025141152	membrane cofactor protein isoform X28	CD46.22	-1.19	20.536	17	3	10	3	1	355	38.5	5.9
XP_025141131	membrane cofactor protein isoform X12	CD46.23	-1.19	20.536	14	3	10	3	1	414	44.9	7.4
XP_025141143	membrane cofactor protein isoform X20	CD46.24	-1.19	20.536	15	3	10	3	1	388	42.2	7.62
XP_025141153	membrane cofactor protein isoform X29	CD46.25	-1.19	20.536	17	3	10	3	1	345	37.9	7.39
XP_025141138	membrane cofactor protein isoform X16	CD46.26	-1.19	20.536	15	3	10	3	1	402	43.7	7.8
XP_025141147	membrane cofactor protein isoform X23	CD46.27	-1.19	20.536	16	3	10	3	1	374	40.8	7.42
XP_025141142	membrane cofactor protein isoform X19	CD46.28	-1.19	20.536	15	3	10	3	1	393	42.7	6.62
XP_006042595	elongation factor 2	EEF2	-1.18	6.653	2	1	2	1	1	858	95.3	6.83
XP_006069473	serine protease inhibitor Kazal-type 5 isoform X4	SPINK5	-1.15	54.834	14	10	48	10	1	1085	122.9	8.1
XP_006069472	serine protease inhibitor Kazal-type 5 isoform X3	SPINK5.1	-1.15	54.834	14	10	48	10	1	1125	127.6	8.1
XP_006069471	serine protease inhibitor Kazal-type 5 isoform X2	SPINK5.2	-1.15	54.834	14	10	48	10	1	1154	130.7	8.07
XP_006069470	serine protease inhibitor Kazal-type 5 isoform X1	SPINK5.3	-1.15	54.834	14	10	48	10	1	1155	130.9	8.1
XP_025129505	LOW QUALITY PROTEIN: fibrous sheath-interacting protein 2	FSIP2	-1.15	4.401	0	1	1	1	1	6939	781.4	6.64
XP_006046663	keratin, type II cytoskeletal 3	KRT3	-1.13	9.409	4	2	13	2	1	629	64.2	7.74
XP_006051457	WAP four-disulfide core domain protein 13	WFDC13	-1.12	3.187	10	1	77	1	1	93	10.5	8.68
XP_006060915	FUN14 domain-containing protein 2	FUNDC2	-1.08	2.003	4	1	6	1	1	190	20.6	9.67
XP_006046672	insulin-like growth factor-binding protein 6	IGFBP6	-1.07	30.748	27	4	14	4	1	237	24.9	8.31
XP_006049892	pleiotrophin isoform X2	PTN	-1.06	13.095	17	4	25	4	1	167	18.8	9.6
XP_006049891	pleiotrophin isoform X1	PTN.1	-1.06	13.095	17	4	25	4	1	168	18.9	9.6
XP_006078376	dihydrodiol dehydrogenase 3-like isoform X4	LOC102400645	-1.05	1.258	3	1	2	1	1	306	34.5	8.92
XP_025119891	dihydrodiol dehydrogenase 3-like isoform X5	LOC102400645.1	-1.05	1.258	3	1	2	1	1	286	32.7	8.69
XP_025119877	dihydrodiol dehydrogenase 3 isoform X2	LOC102396772	-1.05	1.258	3	1	2	1	1	267	30.4	8.27
XP_025119882	prostaglandin F synthase 1 isoform X1	LOC102399987	-1.05	1.258	2	1	2	1	1	323	36.7	7.46
XP_006079932	LOW QUALITY PROTEIN: aldo-keto reductase family 1 member B10	AKR1B10	-1.05	1.258	3	1	2	1	1	316	36.3	6.46
XP_025119872	aldo-keto reductase family 1 member C23-like protein isoform X2	LOC102395957	-1.05	1.258	2	1	2	1	1	327	37	7.49
XP_025119873	dihydrodiol dehydrogenase 3-like isoform X1	LOC102389138	-1.05	1.258	2	1	2	1	1	326	37.4	7.5
XP_025119870	dihydrodiol dehydrogenase 3	LOC102395293	-1.05	1.258	2	1	2	1	1	323	37.1	7.21
XP_006078366	prostaglandin F synthase 1-like	LOC102395635	-1.05	1.258	2	1	2	1	1	323	36.9	6.24
XP_006078369	dihydrodiol dehydrogenase 3 isoform X1	LOC102396772.1	-1.05	1.258	2	1	2	1	1	323	36.7	8.05
XP_025119876	LOW QUALITY PROTEIN: dihydrodiol dehydrogenase 3-like	LOC102396460	-1.05	1.258	2	1	2	1	1	323	36.7	6.8
XP_025119875	dihydrodiol dehydrogenase 3-like isoform X2	LOC102389138.1	-1.05	1.258	3	1	2	1	1	317	36.4	7.81
XP_025119885	dihydrodiol dehydrogenase 3 isoform X4	LOC102399987.1	-1.05	1.258	3	1	2	1	1	287	32.5	8.38
XP_006078370	prostaglandin F synthase 1 isoform X1	LOC102398476	-1.05	1.258	2	1	2	1	1	323	37	7.49
XP_025119881	dihydrodiol dehydrogenase 3-like isoform X3	LOC102399119	-1.05	1.258	4	1	2	1	1	228	25.9	7.43
XP_025119871	prostaglandin F synthase 1 isoform X1	LOC102395957.1	-1.05	1.258	2	1	2	1	1	383	43.3	7.33
XP_025120408	prostaglandin F synthase 1-like	LOC102397840	-1.05	1.258	5	1	2	1	1	175	19.8	9.16
XP_025119890	prostaglandin F synthase 1-like isoform X3	LOC102400645.2	-1.05	1.258	3	1	2	1	1	316	36.2	8.43
XP_025119887	prostaglandin F synthase 1-like	LOC102416534	-1.05	1.258	2	1	2	1	1	323	36.8	7.74
XP_025119889	dihydrodiol dehydrogenase 3-like isoform X2	LOC102400645.3	-1.05	1.258	3	1	2	1	1	320	36.5	8.92
XP_025119880	dihydrodiol dehydrogenase 3-like isoform X2	LOC102399119.1	-1.05	1.258	2	1	2	1	1	323	36.8	8
XP_006078368	prostaglandin F synthase 1 isoform X3	LOC102395957.2	-1.05	1.258	2	1	2	1	1	323	36.7	7.21
XP_006078375	dihydrodiol dehydrogenase 3-like isoform X1	LOC102400645.4	-1.05	1.258	2	1	2	1	1	322	37.1	7.74
XP_025119895	dihydrodiol dehydrogenase 3-like isoform X2	LOC102404780	-1.05	1.258	4	1	2	1	1	227	25.7	6.3
XP_025119894	prostaglandin F synthase 1-like isoform X1	LOC102404780.1	-1.05	1.258	3	1	2	1	1	231	26.3	5.39
XP_006078371	dihydrodiol dehydrogenase 3-like	LOC102398800	-1.05	1.258	2	1	2	1	1	323	37	6.58
XP_006078372	dihydrodiol dehydrogenase 3-like isoform X1	LOC102399119.2	-1.05	1.258	2	1	2	1	1	323	36.9	7.99
XP_025119884	prostaglandin F synthase 1 isoform X3	LOC102399987.2	-1.05	1.258	3	1	2	1	1	296	33.7	7.46
XP_025119892	prostaglandin F synthase 1-like isoform X6	LOC102400645.5	-1.05	1.258	3	1	2	1	1	283	32.4	7.21
XP_025141328	torsin-1A-interacting protein 2	LOC102405684	-1.03	3.753	3	1	2	1	1	469	51.7	5.06
XP_006043414	WAP four-disulfide core domain protein 2	WFDC2	-1.01	121.435	63	7	1283	7	1	123	12.7	4.48
XP_025148263	acrosin inhibitor 1	LOC102401452	-0.98	39.361	44	5	349	5	1	85	10	4.61
XP_006056777	26S proteasome non-ATPase regulatory subunit 2	PSMD2	-0.94	9.115	5	2	3	2	1	908	100.2	5.2
XP_006072344	nuclear receptor coactivator 3 isoform X4	NCOA3	-0.94	1.34	1	1	1	1	1	1376	149.2	7.49
XP_025119113	nuclear receptor coactivator 3 isoform X3	NCOA3.1	-0.94	1.34	1	1	1	1	1	1377	149.3	7.49
XP_006072343	nuclear receptor coactivator 3 isoform X2	NCOA3.2	-0.94	1.34	1	1	1	1	1	1411	153.1	7.59
XP_025119112	nuclear receptor coactivator 3 isoform X1	NCOA3.3	-0.94	1.34	1	1	1	1	1	1412	153.2	7.59
XP_006065910	triosephosphate isomerase	TPI1	-0.93	7.163	15	2	3	2	1	286	30.6	6.55
XP_025147470	serine protease 58-like	LOC112586553	-0.93	4.267	3	1	61	1	1	237	26.7	6.27
XP_025121520	ovochymase-2	OVCH2	-0.93	2.085	2	1	1	1	1	631	70.4	7.88
NP_001277843	lysozyme C, non-stomach isozyme-like precursor	LOC102416255	-0.92	2.85	6	1	4	1	1	148	16.5	8.5
XP_025124222	dynein light chain roadblock-type 2 isoform X2	DYNLRB2	-0.9	5.392	16	1	2	1	1	76	8.6	7.34
XP_006042013	dynein light chain roadblock-type 2 isoform X1	DYNLRB2.1	-0.9	5.392	13	1	2	1	1	96	10.8	7.44
XP_006058003	gamma-interferon-inducible lysosomal thiol reductase	IFI30	-0.89	12.588	13	2	5	2	1	244	27.5	4.94
XP_025125216	synaptogyrin-4	SYNGR4	-0.85	8.284	21	1	3	1	1	234	25.4	7.91
XP_025145790	serine protease inhibitor Kazal-type 2 isoform X1	LOC102397733.1	-0.84	35.169	54	3	35	3	1	84	9.2	6.48
XP_025137121	beta-defensin 43-like	LOC112583835	-0.83	18.344	33	3	16	3	1	69	8	9.2
XP_025139618	dynactin subunit 2 isoform X4	DCTN2	-0.83	13.315	5	2	9	2	1	402	44.4	6.61
XP_025139621	dynactin subunit 2 isoform X6	DCTN2.1	-0.83	13.315	5	2	9	2	1	387	42.6	6.13
XP_025139620	dynactin subunit 2 isoform X5	DCTN2.2	-0.83	13.315	5	2	9	2	1	389	42.8	6.13
XP_006063725	antithrombin-III	SERPINC1	-0.83	4.382	2	1	11	1	1	465	52.4	6.8
XP_025135706	leucine-rich repeat-containing protein 37A3 isoform X1	LOC102416251	-0.81	29.644	2	6	41	6	1	2553	280.5	4.93
XP_025135707	leucine-rich repeat-containing protein 37A3 isoform X2	LOC102416251.1	-0.81	29.644	2	6	41	6	1	2478	271.8	4.91
XP_006067744	annexin A1	ANXA1	-0.8	16.609	8	2	2	2	1	346	38.9	7.08
XP_025125571	uncharacterized protein LOC102403160	LOC102403160	-0.79	8.53	3	2	3	2	1	916	100.5	6.83
XP_025129011	tubulin beta-6 chain isoform X2	TUBB6	-0.79	4.067	4	1	1	1	1	374	42	4.87
XP_006043089	tubulin beta-6 chain isoform X1	TUBB6.1	-0.79	4.067	3	1	1	1	1	446	49.9	4.86
XP_025137594	endoplasmic reticulum resident protein 44 isoform X2	ERP44	-0.79	3.559	3	1	1	1	1	344	39.8	5.77
XP_025137593	endoplasmic reticulum resident protein 44 isoform X1	ERP44.1	-0.79	3.559	3	1	1	1	1	406	46.8	5.31
XP_025147271	coiled-coil domain-containing protein 136 isoform X3	CCDC136	-0.79	3.507	1	1	3	1	1	1044	121.3	4.87
XP_006057707	sperm surface protein Sp17	SPA17	-0.77	20.28	48	5	16	5	1	147	16.9	4.83
XP_025133615	cancer/testis antigen 47A-like isoform X2	LOC112582802	-0.77	8.276	12	2	3	2	1	275	29.5	4.35
XP_025133354	cancer/testis antigen 47A-like	LOC102411503	-0.77	8.276	12	2	3	2	1	277	29.7	4.37
XP_025133355	cancer/testis antigen 47A-like isoform X1	LOC112582685	-0.77	8.276	12	2	3	2	1	277	29.7	4.41
XP_025133614	cancer/testis antigen 47A-like isoform X1	LOC112582802.1	-0.77	8.276	12	2	3	2	1	277	29.7	4.37
XP_025119161	spleen trypsin inhibitor I-like	LOC112577708	-0.77	7.654	13	2	89	2	1	98	10.6	8.1
XP_006074847	allergen Bos d 2-like isoform X1	LOC102393892	-0.77	7.138	10	1	17	1	1	172	19.2	4.73
XP_025133353	LOW QUALITY PROTEIN: cancer/testis antigen 47A-like, partial	LOC112582684	-0.77	5.124	4	1	2	1	1	264	28.2	4.36
XP_025132162	cancer/testis antigen 47A-like isoform X2	LOC112582129	-0.77	5.124	4	1	2	1	1	275	29.4	4.37
XP_025133415	cancer/testis antigen 47A-like isoform X1	LOC112582730	-0.77	5.124	4	1	2	1	1	277	29.6	4.44
XP_025132151	cancer/testis antigen 47A-like isoform X2	LOC102398514	-0.77	5.124	4	1	2	1	1	275	29.3	4.45
XP_025133618	cancer/testis antigen 47A-like isoform X2	LOC112582803	-0.77	5.124	4	1	2	1	1	275	29.4	4.41
XP_025132161	cancer/testis antigen 47A-like isoform X1	LOC112582129.1	-0.77	5.124	4	1	2	1	1	277	29.6	4.4
XP_006043352	cancer/testis antigen 47A-like isoform X1	LOC102398514.1	-0.77	5.124	4	1	2	1	1	277	29.5	4.48
XP_025123823	heat shock 70 kDa protein 4L isoform X2	HSPA4L	-0.76	12.708	5	4	8	4	1	840	94.8	5.76
XP_006067363	heat shock 70 kDa protein 4L isoform X1	HSPA4L.1	-0.76	12.708	4	4	8	4	1	1023	115.4	5.4
XP_025126570	disintegrin and metalloproteinase domain-containing protein 20-like	LOC112580657	-0.76	4.265	1	1	8	1	1	730	82.3	7.42
XP_006040113	disintegrin and metalloproteinase domain-containing protein 20-like	LOC102408768	-0.76	4.265	1	1	8	1	1	730	82	7.31
XP_006071457	tubulin alpha-8 chain	TUBA8	-0.76	2.574	4	1	3	1	1	449	50	5.2
XP_025138474	fibulin-1 isoform X2	FBLN1	-0.75	42.839	20	8	42	8	1	686	75	5.07
XP_006052795	basigin	BSG	-0.73	12.43	4	2	20	2	1	271	29.8	5.94
XP_025136681	phosphatidylinositol transfer protein alpha isoform isoform X1	PITPNA	-0.73	5.814	5	1	1	1	1	270	31.8	6.55
XP_025136682	phosphatidylinositol transfer protein alpha isoform isoform X2	PITPNA.1	-0.73	5.814	5	1	1	1	1	264	31.1	6.54
XP_006065099	angiotensinogen	AGT	-0.69	5.791	6	1	4	1	1	476	51.5	6.96
XP_006046553	uncharacterized protein C7orf61 homolog isoform X1	C24H7orf61	-0.68	2.332	4	1	2	1	1	204	23.5	10.78
XP_006046552	uncharacterized protein C7orf61 homolog isoform X2	C24H7orf61.1	-0.68	2.332	5	1	2	1	1	200	22.4	10.43
XP_025138879	acrosin-binding protein isoform X2	ACRBP	-0.64	42.089	12	7	45	7	1	486	54.9	4.97
XP_006064767	folate receptor beta isoform X4	FOLR2.3	-0.64	1.572	3	1	1	0	2	222	25.7	7.3
XP_025138473	fibulin-1 isoform X1	FBLN1.1	-0.63	46.359	21	9	49	9	1	706	77.6	5.06
XP_006049715	ATPase inhibitor, mitochondrial	ATP5IF1	-0.63	9.98	27	4	12	4	1	109	12.3	9.35
XP_025124893	IgGFc-binding protein isoform X2	FCGBP	-0.63	9.952	1	2	3	2	1	2585	274.9	5.06
XP_025124892	IgGFc-binding protein isoform X1	FCGBP.1	-0.63	9.952	1	2	3	2	1	3001	318.5	5.21
XP_006059583	carboxypeptidase D	CPD	-0.61	4.672	2	1	4	1	1	1378	152.6	6.1
XP_025122424	ADM isoform X2	ADM	-0.6	81.536	37	8	179	8	1	188	21	11.06
XP_025135470	putative sodium-coupled neutral amino acid transporter 10 isoform X4	SLC38A10	-0.6	17.366	4	3	9	3	1	1086	115.9	5.8
XP_025135467	putative sodium-coupled neutral amino acid transporter 10 isoform X1	SLC38A10.1	-0.6	17.366	4	3	9	3	1	1094	116.8	5.85
XP_025135473	putative sodium-coupled neutral amino acid transporter 10 isoform X7	SLC38A10.2	-0.6	17.366	6	3	9	3	1	834	89.3	6.71
XP_025135472	putative sodium-coupled neutral amino acid transporter 10 isoform X6	SLC38A10.3	-0.6	17.366	4	3	9	3	1	1081	115.3	5.8
XP_025135471	putative sodium-coupled neutral amino acid transporter 10 isoform X5	SLC38A10.4	-0.6	17.366	4	3	9	3	1	1085	115.8	5.85
XP_025135468	putative sodium-coupled neutral amino acid transporter 10 isoform X2	SLC38A10.5	-0.6	17.366	4	3	9	3	1	1091	116.5	5.95
XP_025135469	putative sodium-coupled neutral amino acid transporter 10 isoform X3	SLC38A10.6	-0.6	17.366	4	3	9	3	1	1089	116.2	5.85
XP_006060284	A disintegrin and metalloproteinase with thrombospondin motifs 19	ADAMTS19	-0.6	4.851	1	1	7	1	1	1203	133.1	7.84
XP_025142152	acrosomal protein SP-10	ACRV1	-0.58	48.013	15	7	73	7	1	273	28.9	4.63
XP_025129144	proteasome subunit alpha-type 8 isoform X1	PSMA8	-0.58	8.215	14	2	3	2	1	251	28	9
XP_006052347	proteasome subunit alpha-type 8 isoform X2	PSMA8.1	-0.58	8.215	14	2	3	2	1	250	27.9	9
XP_006052425	alpha-2,8-sialyltransferase 8F isoform X1	ST8SIA6	-0.57	3.727	2	1	8	1	1	398	45.1	9.04
XP_025120126	alpha-2,8-sialyltransferase 8F isoform X3	ST8SIA6.1	-0.57	3.727	3	1	8	1	1	321	36.6	8.68
XP_025120125	alpha-2,8-sialyltransferase 8F isoform X2	ST8SIA6.2	-0.57	3.727	3	1	8	1	1	334	38.1	8.66
XP_025149641	LOW QUALITY PROTEIN: IQ domain-containing protein N	IQCN	-0.56	30.96	3	4	16	4	1	3657	377.3	9.33
XP_025120495	beta-defensin 121 isoform X2	LOC102413260	-0.56	15.408	24	4	37	4	1	80	9.3	7.61
XP_025144323	adenylate kinase 4, mitochondrial isoform X3	AK4	-0.56	2.112	5	1	6	1	1	171	19.8	6.8
XP_025133994	LOW QUALITY PROTEIN: disintegrin and metalloproteinase domain-containing protein 2	ADAM2	-0.55	90.842	20	10	60	10	1	745	83	5.44
XP_006054867	calmodulin-2	CALM2	-0.54	16.135	16	2	32	2	1	149	16.8	4.22
XP_025150878	calmodulin-1 isoform X1	CALM1	-0.54	16.135	16	2	32	2	1	150	17	4.22
XP_006065651	coiled-coil domain-containing protein 116 isoform X2	CCDC116	-0.54	3.537	2	1	1	1	1	617	68	9.74
XP_006065650	coiled-coil domain-containing protein 116 isoform X1	CCDC116.1	-0.54	3.537	2	1	1	1	1	625	68.8	9.67
XP_006058422	serine protease inhibitor Kazal-type 2 isoform X1	LOC102396469	-0.53	38.559	36	2	36	2	1	85	9.5	6.98
XP_006059122	C-C motif chemokine 22	CCL22	-0.53	1.353	8	1	6	1	1	93	10.6	8.98
XP_025152042	sperm equatorial segment protein 1	SPESP1	-0.52	57.253	25	8	65	8	1	370	41.9	6.11
XP_025145660	ecto-ADP-ribosyltransferase 3 isoform X2	ART3	-0.52	5.693	5	2	6	2	1	416	47.1	5.52
XP_006078321	leucine-rich colipase-like protein 1 isoform X3	LRCOL1	-0.52	4.62	8	2	9	2	1	192	21.8	8.37
XP_006041616	calreticulin	CALR	-0.52	1.887	2	1	6	1	1	417	48	4.46
XP_025136708	diazepam-binding inhibitor-like 5	LOC102397816	-0.5	38.98	61	5	86	5	1	87	9.8	7.91
XP_025136892	WAP four-disulfide core domain protein 18-like	LOC112583794	-0.5	14.756	16	3	7	3	1	93	9.6	8.84
XP_025136891	WAP four-disulfide core domain protein 18-like	LOC112583793	-0.5	14.756	16	3	7	3	1	93	9.5	5.29
XP_025151784	angiogenin	ANG	-0.49	157.444	64	13	486	13	1	148	16.9	8.66
XP_006046651	keratin, type II cytoskeletal 5	KRT5	-0.49	6.127	2	1	12	1	1	595	62.5	7.81
XP_006058536	keratin, type II cytoskeletal 7	KRT7	-0.49	6.127	3	1	12	1	1	466	51.7	6.71
XP_025140015	LOW QUALITY PROTEIN: keratin, type II cytoskeletal 75	LOC102416114	-0.49	6.127	2	1	12	1	1	594	64.3	8.32
XP_025151779	inactive ribonuclease-like protein 9	LOC112587877	-0.49	5.133	11	1	2	1	1	209	24.1	7.47
XP_025150355	centrosomal protein of 162 kDa isoform X2	CEP162	-0.49	3.774	1	2	20	2	1	1335	153.5	5.49
XP_006054804	centrosomal protein of 162 kDa isoform X1	CEP162.1	-0.49	3.774	0	2	20	2	1	1402	161.4	5.5
XP_006061115	CAP-Gly domain-containing linker protein 4	CLIP4	-0.49	1.415	2	1	3	1	1	704	76.1	8.7
XP_025142098	serum amyloid A protein isoform X1	LOC102409611	-0.48	44.566	20	7	46	7	1	255	28.7	9
XP_025142100	serum amyloid A protein isoform X4	LOC102409611.1	-0.48	44.566	27	7	46	7	1	187	21.1	9.72
XP_025142101	serum amyloid A protein isoform X5	LOC102409611.2	-0.48	44.566	39	7	46	7	1	131	14.5	9.2
XP_025142099	serum amyloid A protein isoform X2	LOC102409611.3	-0.48	44.566	25	7	46	7	1	208	23.3	9.47
XP_006080250	membrane-associated progesterone receptor component 1	PGRMC1	-0.48	2.03	4	1	1	1	1	194	21.6	4.65
XP_025151789	ribonuclease pancreatic-like	LOC102415699	-0.47	223.79	77	11	424	9	1	150	16.5	8.29
XP_025145236	neuronal growth regulator 1	NEGR1	-0.47	3.529	4	1	1	1	1	354	38.7	6.21
XP_025124939	hormone-sensitive lipase isoform X1	LIPE	-0.46	56.593	16	10	65	10	1	1042	114.5	6.98
XP_006061196	LOW QUALITY PROTEIN: lysyl oxidase homolog 4	LOXL4	-0.46	30.174	9	5	10	5	1	759	84.4	7.44
XP_006045164	complement C3	C3	-0.45	74.276	11	15	54	15	1	1661	187.3	6.86
XP_006064284	protein disulfide-isomerase	P4HB	-0.45	13.416	7	4	16	4	1	510	57.1	4.91
XP_006064636	copper homeostasis protein cutC homolog isoform X3	CUTC	-0.44	3.343	7	2	5	2	1	225	24	9.47
XP_006053085	putative phospholipase B-like 2	PLBD2	-0.43	8.96	6	3	4	3	1	589	65.7	8.09
XP_006044778	transmembrane protease serine 13 isoform X2	TMPRSS13	-0.43	1.374	2	1	1	0	2	502	55.9	8.22
XP_006079898	transmembrane protease serine 11A isoform X2	TMPRSS11A	-0.43	1.374	2	1	1	0	2	404	45.5	9.26
XP_006044777	transmembrane protease serine 13 isoform X1	TMPRSS13.1	-0.43	1.374	2	1	1	0	2	515	57.2	8.29
XP_006079897	transmembrane protease serine 11A isoform X1	TMPRSS11A.1	-0.43	1.374	2	1	1	0	2	417	46.8	9.26
XP_025143669	protein MENT isoform X1	C6H1orf56	-0.42	89.073	35	12	81	12	1	349	38	8.13
XP_006058204	protein MENT isoform X2	C6H1orf56.1	-0.42	89.073	39	12	81	12	1	308	33.2	7.08
XP_025135696	histone H2B type 1-L-like	LOC112583653	-0.42	12.329	12	1	7	1	1	126	13.9	10.13
XP_025142106	serum amyloid A protein isoform X2	LOC102409057	-0.41	48.453	52	8	61	8	1	131	14.5	8.97
XP_025142104	serum amyloid A protein isoform X1	LOC102409057.1	-0.41	48.453	50	8	61	8	1	135	14.9	8.97
XP_025142108	serum amyloid A protein-like	LOC112577794	-0.41	48.453	52	8	61	8	1	131	14.6	9.2
XP_025137116	disintegrin and metalloproteinase domain-containing protein 20-like	LOC112583833	-0.41	44.373	8	6	50	3	1	761	86.3	7.08
XP_006067176	leucine-rich alpha-2-glycoprotein	LRG1	-0.41	23.996	22	5	33	5	1	353	39	6.8
XP_006059541	A-kinase anchor protein 4 isoform X1	AKAP4	-0.41	8.131	3	2	6	2	1	860	95.6	6.87
XP_006059540	A-kinase anchor protein 4 isoform X2	AKAP4.1	-0.41	8.131	3	2	6	2	1	848	94.3	6.79
XP_006041541	extracellular superoxide dismutase [Cu-Zn] isoform X2	SOD3	-0.4	162.259	46	14	384	14	1	241	26.2	7.28
XP_025146024	extracellular superoxide dismutase [Cu-Zn] isoform X1	SOD3.1	-0.4	162.259	42	14	384	14	1	262	28.5	8.51
XP_025145318	LOW QUALITY PROTEIN: mucin-2	LOC102400605	-0.4	107.576	9	21	324	21	1	2782	287.2	5.39
XP_025119100	double-stranded RNA-binding protein Staufen homolog 1 isoform X3	STAU1	-0.4	8.792	4	2	4	2	1	600	65.6	9.06
XP_006068512	cAMP-dependent protein kinase type II-beta regulatory subunit	PRKAR2B	-0.4	3.82	5	2	2	2	1	418	46.3	4.94
XP_025123205	LOW QUALITY PROTEIN: protein-tyrosine sulfotransferase 2	TPST2	-0.39	12.389	4	1	5	1	1	377	41.9	9.26
XP_006062451	CD59 glycoprotein	CD59	-0.39	8.689	19	3	18	3	1	122	13.6	7.74
XP_006077608	C-Myc-binding protein	MYCBP	-0.39	6.805	11	2	8	2	1	126	14	5.91
XP_025138945	c-Myc-binding protein	LOC102405126	-0.39	6.805	12	2	8	2	1	118	13.4	5.91
XP_025151884	histone H3.1-like	LOC102394835	-0.39	1.859	5	1	2	0	4	132	14.9	10.7
XP_025132316	histone H3.3-like	LOC112582190	-0.39	1.859	5	1	2	0	4	136	15.4	11.12
XP_025120043	lysozyme-like protein 1	LOC102401702	-0.37	9.134	20	2	5	2	1	148	16.8	7.83
XP_006077052	V-type proton ATPase subunit H isoform X4	ATP6V1H	-0.37	6.706	3	1	15	1	1	465	54.1	6.61
XP_006077050	V-type proton ATPase subunit H isoform X3	ATP6V1H.1	-0.37	6.706	3	1	15	1	1	483	55.8	6.61
XP_025121199	V-type proton ATPase subunit H isoform X2	ATP6V1H.2	-0.37	6.706	3	1	15	1	1	486	56.4	6.95
XP_025121198	V-type proton ATPase subunit H isoform X1	ATP6V1H.3	-0.37	6.706	3	1	15	1	1	504	58.1	6.95
XP_006070901	stress-70 protein, mitochondrial	HSPA9	-0.37	1.896	1	1	1	0	2	679	73.7	6.3
XP_025139615	dynactin subunit 2 isoform X1	DCTN2.3	-0.36	16.606	7	3	30	3	1	408	44.9	5.16
XP_025139616	dynactin subunit 2 isoform X2	DCTN2.4	-0.36	16.606	7	3	30	3	1	405	44.5	5.16
XP_025139617	dynactin subunit 2 isoform X3	DCTN2.5	-0.36	16.606	7	3	30	3	1	403	44.3	5.21
XP_006041554	keratin, type I cytoskeletal 13	KRT13	-0.35	4.543	4	2	13	2	1	435	47.3	4.92
XP_006041555	keratin, type I cytoskeletal 15	KRT15	-0.35	4.543	4	2	13	2	1	453	49.1	4.88
XP_006056123	L-lactate dehydrogenase A chain isoform X2	LOC102412044	-0.35	1.703	3	1	1	1	1	361	39.7	8.37
XP_006067703	L-lactate dehydrogenase B chain isoform X1	LDHB	-0.35	1.703	3	1	1	1	1	334	36.6	6.44
XP_025142095	L-lactate dehydrogenase A chain isoform X1	LOC102412044.1	-0.35	1.703	3	1	1	1	1	332	36.6	8
NP_001277776	L-lactate dehydrogenase B chain	LDHB.1	-0.35	1.703	3	1	1	1	1	334	36.7	6.05
XP_006043265	neutral alpha-glucosidase AB isoform X2	GANAB	-0.34	9.919	1	1	7	1	1	944	106.8	6.11
XP_006043264	neutral alpha-glucosidase AB isoform X1	GANAB.1	-0.34	9.919	1	1	7	1	1	966	109.4	6.2
XP_025135927	kelch-like protein 10 isoform X1	KLHL10	-0.34	5.086	2	1	3	1	1	614	69.5	5.77
XP_006055837	kelch-like protein 10 isoform X2	KLHL10.1	-0.34	5.086	2	1	3	1	1	608	68.9	5.77
XP_006075488	legumain	LGMN	-0.33	22.593	8	4	13	4	1	433	49.3	6.64
XP_006048449	probable inactive ribonuclease-like protein 12 isoform X2	RNASE12	-0.33	10.752	11	2	20	2	1	169	19.7	8.31
XP_006048448	probable inactive ribonuclease-like protein 12 isoform X1	RNASE12.1	-0.33	10.752	9	2	20	2	1	203	23.8	7.46
XP_025151782	probable inactive ribonuclease-like protein 12 isoform X3	RNASE12.2	-0.33	10.752	13	2	20	2	1	145	16.9	6.65
XP_006056116	serum amyloid A protein-like	LOC102410151	-0.33	9.279	26	3	18	3	1	130	14.5	8.13
XP_025142103	serum amyloid A protein isoform X2	LOC112577744	-0.33	9.279	24	3	18	3	1	139	15.6	9.01
XP_025142102	serum amyloid A protein isoform X1	LOC112577744.1	-0.33	9.279	22	3	18	3	1	155	17.3	8.94
XP_025129446	twisted gastrulation protein homolog 1 isoform X2	TWSG1	-0.32	7.862	12	2	7	2	1	194	21.4	5.3
XP_025129445	twisted gastrulation protein homolog 1 isoform X1	TWSG1.1	-0.32	7.862	11	2	7	2	1	223	24.9	5.34
XP_025119156	kunitz-type protease inhibitor 4	SPINT4	-0.31	62.963	28	4	135	4	1	106	12.1	8.37
XP_006057351	4-trimethylaminobutyraldehyde dehydrogenase	ALDH9A1	-0.31	12.12	6	3	7	3	1	520	56.5	6.57
XP_006042334	osteopontin	SPP1	-0.3	253.995	60	18	356	18	1	280	31.2	4.67
XP_025122423	ADM isoform X1	ADM.1	-0.3	97.247	44	10	194	10	1	189	21.1	11.06
XP_006044451	proteasome subunit alpha type-4	PSMA4	-0.3	3.756	3	1	14	1	1	261	29.5	7.72
XP_006043252	mammaglobin-A	LOC102396096	-0.29	96.329	34	10	1233	10	1	94	10.8	4.67
XP_006042639	histidine triad nucleotide-binding protein 3 isoform X1	HINT3	-0.29	21.904	35	4	14	4	1	217	24.2	7.28
XP_006042640	histidine triad nucleotide-binding protein 3 isoform X2	HINT3.1	-0.29	21.904	42	4	14	4	1	182	20.5	6.6
XP_006079814	serine racemase isoform X1	SRR	-0.29	18.694	10	3	15	3	1	345	37.5	6.87
XP_025136661	serine racemase isoform X3	SRR.1	-0.29	18.694	10	3	15	3	1	334	36.2	6.04
XP_025136656	serine racemase isoform X2	SRR.2	-0.29	18.694	10	3	15	3	1	339	36.8	6.05
XP_025136662	serine racemase isoform X4	SRR.3	-0.29	7.53	9	1	9	1	1	185	19.8	5.02
XP_025143938	sortilin isoform X5	SORT1	-0.29	1.445	2	1	1	1	1	784	86.7	5.88
XP_025143936	sortilin isoform X3	SORT1.1	-0.29	1.445	2	1	1	1	1	818	90.4	6.05
XP_025143937	sortilin isoform X4	SORT1.2	-0.29	1.445	2	1	1	1	1	817	90.3	5.99
XP_025122554	complement C1q tumor necrosis factor-related protein 5	C1QTNF5	-0.28	33.5	28	7	29	7	1	243	25.3	6.54
XP_006077688	antileukoproteinase	SLPI	-0.28	11.898	15	2	10	2	1	131	14	8.29
XP_025123676	leucine-rich colipase-like protein 1 isoform X2	LRCOL1.1	-0.28	2.815	4	1	8	1	1	197	22.5	7.99
XP_025123677	leucine-rich colipase-like protein 1 isoform X4	LRCOL1.2	-0.28	2.815	5	1	8	1	1	171	19.7	7.75
XP_025123675	leucine-rich colipase-like protein 1 isoform X1	LRCOL1.3	-0.28	2.815	4	1	8	1	1	206	23.5	8
XP_006072201	heat shock-related 70 kDa protein 2	HSPA2	-0.27	94.15	25	18	88	11	1	636	69.8	5.67
XP_025121019	double-stranded RNA-binding protein Staufen homolog 2 isoform X3	STAU2	-0.27	2.927	1	1	1	1	1	622	68.5	9.42
XP_025121017	double-stranded RNA-binding protein Staufen homolog 2 isoform X1	STAU2.1	-0.27	2.927	1	1	1	1	1	632	69.4	9.39
XP_025121025	double-stranded RNA-binding protein Staufen homolog 2 isoform X6	STAU2.2	-0.27	2.927	1	1	1	1	1	581	63.7	9.29
XP_025121022	double-stranded RNA-binding protein Staufen homolog 2 isoform X4	STAU2.3	-0.27	2.927	1	1	1	1	1	613	67.4	9.39
XP_025121018	double-stranded RNA-binding protein Staufen homolog 2 isoform X2	STAU2.4	-0.27	2.927	1	1	1	1	1	632	69.5	9.32
XP_025121029	double-stranded RNA-binding protein Staufen homolog 2 isoform X8	STAU2.5	-0.27	2.927	2	1	1	1	1	473	51.9	9.61
XP_025121024	double-stranded RNA-binding protein Staufen homolog 2 isoform X5	STAU2.6	-0.27	2.927	1	1	1	1	1	594	65.3	9.54
XP_025121027	double-stranded RNA-binding protein Staufen homolog 2 isoform X7	STAU2.7	-0.27	2.927	2	1	1	1	1	527	58.2	9.77
XP_025121030	double-stranded RNA-binding protein Staufen homolog 2 isoform X9	STAU2.8	-0.27	2.927	1	1	1	1	1	575	63	9.29
XP_025146904	thioredoxin domain-containing protein 3 isoform X2	NME8	-0.26	2.325	1	1	5	1	1	557	63.9	4.89
XP_025146905	thioredoxin domain-containing protein 3 isoform X3	NME8.1	-0.26	2.325	2	1	5	1	1	489	56	4.89
XP_025146903	thioredoxin domain-containing protein 3 isoform X1	NME8.2	-0.26	2.325	1	1	5	1	1	588	67.5	4.91
XP_025146906	thioredoxin domain-containing protein 3 isoform X4	NME8.3	-0.26	2.325	2	1	5	1	1	482	55	4.92
XP_006058391	phosducin-like protein 2 isoform X1	PDCL2	-0.25	2.736	4	1	2	1	1	242	28	4.81
XP_025145826	phosducin-like protein 2 isoform X2	PDCL2.1	-0.25	2.736	4	1	2	1	1	210	24.2	5.2
NP_001277869	insulin-like growth factor-binding protein 5 precursor	IGFBP5	-0.25	2.358	7	1	1	1	1	271	30.3	8.18
XP_025138880	acrosin-binding protein isoform X3	ACRBP.1	-0.24	71.995	19	11	67	11	1	469	53.3	4.97
XP_025119521	beta-defensin 113	DEFB113	-0.24	23.96	26	5	50	5	1	117	13.4	8.78
XP_006045325	LOW QUALITY PROTEIN: galactokinase	GALK1	-0.24	10.376	7	4	8	4	1	392	42.1	5.91
XP_006076999	immunoglobulin superfamily member 5 isoform X2	IGSF5	-0.23	8.06	9	2	8	2	1	324	34.7	6.43
XP_006076998	immunoglobulin superfamily member 5 isoform X1	IGSF5.1	-0.23	8.06	8	2	8	2	1	370	39.7	6.23
XP_006061264	V-type proton ATPase subunit G 1	ATP6V1G1	-0.22	15.753	32	2	7	2	1	118	13.7	7.97
XP_025150114	ezrin	EZR	-0.21	56.343	19	11	86	11	1	581	68.7	6.42
XP_006051403	WAP four-disulfide core domain protein 10A	LOC102405698	-0.21	22.009	26	5	27	5	1	117	13	8.75
XP_006076059	translin isoform X1	TSN	-0.2	5.046	6	1	2	1	1	228	26.2	6.44
XP_006079824	alpha-2-antiplasmin isoform X3	SERPINF2	-0.18	29.992	14	9	28	9	1	491	54.7	5.62
XP_006079823	alpha-2-antiplasmin isoform X2	SERPINF2.1	-0.18	29.992	14	9	28	9	1	492	54.8	5.62
XP_025136673	alpha-2-antiplasmin isoform X1	SERPINF2.2	-0.18	29.992	14	9	28	9	1	503	55.9	5.62
XP_025150226	zinc finger C2HC domain-containing protein 1B	ZC2HC1B	-0.18	18.836	22	4	23	4	1	221	24.4	10.04
XP_025143364	CD5 antigen-like isoform X1	CD5L	-0.17	15.991	10	2	16	2	1	672	74.2	4.75
XP_025122634	apolipoprotein A-I isoform X1	APOA1	-0.17	7.56	13	3	3	3	1	265	30.3	5.97
XP_025121371	glycosyl-phosphatidylinositol-anchored molecule-like protein isoform X2	LOC112579232	-0.17	6.004	10	3	6	3	1	263	29.6	8.79
XP_025121370	glycosyl-phosphatidylinositol-anchored molecule-like protein isoform X1	LOC112579232.1	-0.17	6.004	9	3	6	3	1	290	32	9
XP_025121366	glycosyl-phosphatidylinositol-anchored molecule-like protein	LOC112579230	-0.17	6.004	10	3	6	3	1	263	29.6	8.73
XP_025138571	aconitate hydratase, mitochondrial isoform X1	ACO2	-0.17	5.722	3	2	3	2	1	819	89.3	8.05
XP_006068964	aconitate hydratase, mitochondrial isoform X2	ACO2.1	-0.17	5.722	4	2	3	2	1	780	85.3	7.83
XP_006054051	26S proteasome regulatory subunit 10B	PSMC6	-0.17	4.418	3	1	3	1	1	403	45.8	7.78
XP_006058368	C-C motif chemokine 2	LOC102408963	-0.17	3.141	13	2	10	2	1	99	11.1	9.48
XP_006044192	angiotensin-converting enzyme isoform X3	LOC102392455	-0.16	53.418	12	15	114	15	1	767	87.5	7.08
XP_006068405	hsp90 co-chaperone Cdc37	CDC37	-0.16	16.332	10	2	8	2	1	380	44.5	5.17
XP_006054376	retinol dehydrogenase 14	RDH14	-0.16	5.815	6	2	4	2	1	336	36.6	7.74
XP_006041818	autophagy-related protein 16-1 isoform X3	ATG16L1	-0.16	1.331	1	1	5	1	1	607	68.3	6.47
XP_006041819	autophagy-related protein 16-1 isoform X4	ATG16L1.1	-0.16	1.331	1	1	5	1	1	588	66.3	6.39
XP_025144944	autophagy-related protein 16-1 isoform X1	ATG16L1.2	-0.16	1.331	1	1	5	1	1	573	64.2	6.09
XP_025144945	autophagy-related protein 16-1 isoform X2	ATG16L1.3	-0.16	1.331	1	1	5	1	1	554	62.3	6
XP_006068864	HAUS augmin-like complex subunit 5	HAUS5	-0.16	1.331	1	1	5	1	1	633	71.5	7.17
XP_006052153	cationic trypsin	LOC102403534	-0.15	200.283	48	13	1345	5	1	246	25.8	7.91
XP_006056492	cystatin-M	CST6	-0.15	130.53	53	9	189	9	1	149	16.4	7.74
XP_025122814	caspase-13	LOC102394992	-0.15	1.458	3	1	2	1	1	377	42.8	5.77
XP_025126205	NEDD8-conjugating enzyme Ubc12 isoform X2	UBE2M	-0.14	2.577	8	1	1	1	1	159	17.5	7.65
XP_006050776	cysteine-rich secretory protein 1	CRISP1	-0.13	93.582	21	9	191	9	1	247	28.1	6.86
NP_001277821	aspartate aminotransferase, cytoplasmic	GOT1	-0.13	33.549	14	5	32	5	1	413	46.4	7.49
XP_006056444	programmed cell death protein 5	PDCD5	-0.13	33.119	46	5	27	5	1	125	14.2	6.58
XP_025147963	peptidyl-glycine alpha-amidating monooxygenase isoform X7	PAM	-0.13	9.3	3	4	15	4	1	866	96	6.8
XP_025147964	peptidyl-glycine alpha-amidating monooxygenase isoform X8	PAM.1	-0.13	9.3	3	4	15	4	1	865	96	6.8
XP_025132614	allergen Bos d 2-like	LOC102396043	-0.13	7.241	4	2	22	2	1	276	31.4	5.12
XP_006049910	26S proteasome regulatory subunit 7	PSMC2	-0.12	9.712	5	2	5	2	1	433	48.6	5.95
XP_025142107	serum amyloid A protein-like	LOC112585166	-0.11	31.345	40	6	40	6	1	131	14.5	9.2
XP_006051474	inhibitor of carbonic anhydrase isoform X2	LOC102400938	-0.1	18.954	10	5	13	4	1	702	77.5	7.05
XP_006051473	inhibitor of carbonic anhydrase isoform X1	LOC102400938.1	-0.1	18.954	10	5	13	4	1	703	77.5	7.05
XP_006077991	elongation factor Ts, mitochondrial	TSFM	-0.1	1.322	2	1	1	1	1	338	36.6	7.24
XP_025122256	ecto-ADP-ribosyltransferase 5-like isoform X3	LOC102399593	-0.09	36.657	16	5	65	0	2	298	32.8	6.21
XP_006042170	hemopexin	HPX	-0.09	14.262	5	3	31	3	1	459	52	7.28
XP_025141916	complement factor H isoform X1	LOC102394267	-0.08	310.905	41	44	524	1	1	1239	140.3	6.58
XP_025141918	complement factor H isoform X2	LOC102394267.1	-0.08	310.905	43	44	524	1	1	1181	133.9	6.76
XP_006072721	histidine triad nucleotide-binding protein 1	HINT1	-0.08	9.017	11	1	24	1	1	126	13.8	6.79
NP_001277813	malate dehydrogenase, mitochondrial	MDH2	-0.08	3.581	3	1	3	1	1	338	35.7	8.56
XP_025123310	disintegrin and metalloproteinase domain-containing protein 1a-like	LOC112579918	-0.07	98.426	11	13	102	13	1	808	90	6.14
XP_025120746	ectonucleotide pyrophosphatase/phosphodiesterase family member 2 isoform X4	ENPP2	-0.07	16.82	3	3	13	3	1	945	107.7	8.35
XP_025120744	ectonucleotide pyrophosphatase/phosphodiesterase family member 2 isoform X2	ENPP2.1	-0.07	16.82	3	3	13	3	1	961	110.3	7.91
XP_025120748	ectonucleotide pyrophosphatase/phosphodiesterase family member 2 isoform X6	ENPP2.2	-0.07	16.82	4	3	13	3	1	930	106.7	8.05
XP_006074765	ectonucleotide pyrophosphatase/phosphodiesterase family member 2 isoform X9	ENPP2.3	-0.07	16.82	4	3	13	3	1	888	101.7	7.37
XP_006074764	ectonucleotide pyrophosphatase/phosphodiesterase family member 2 isoform X8	ENPP2.4	-0.07	16.82	4	3	13	3	1	915	105	8.03
XP_025120743	ectonucleotide pyrophosphatase/phosphodiesterase family member 2 isoform X1	ENPP2.5	-0.07	16.82	3	3	13	3	1	970	110.6	8.47
XP_025120749	ectonucleotide pyrophosphatase/phosphodiesterase family member 2 isoform X7	ENPP2.6	-0.07	16.82	4	3	13	3	1	918	104.4	7.87
XP_006074766	ectonucleotide pyrophosphatase/phosphodiesterase family member 2 isoform X10	ENPP2.7	-0.07	16.82	4	3	13	3	1	863	98.8	7.15
XP_025120747	ectonucleotide pyrophosphatase/phosphodiesterase family member 2 isoform X5	ENPP2.8	-0.07	16.82	4	3	13	3	1	940	107.9	8.16
XP_025120745	ectonucleotide pyrophosphatase/phosphodiesterase family member 2 isoform X3	ENPP2.9	-0.07	16.82	3	3	13	3	1	954	109.4	8.13
XP_025116386	BOLA class I histocompatibility antigen, alpha chain BL3-6-like isoform X3	LOC102390435	-0.06	4.609	4	1	16	1	1	326	36.9	5.6
XP_025116445	BOLA class I histocompatibility antigen, alpha chain BL3-6 isoform X1	LOC102402481	-0.06	4.609	4	1	16	1	1	360	40.8	5.95
XP_025116460	BOLA class I histocompatibility antigen, alpha chain BL3-6 isoform X3	LOC102402481.1	-0.06	4.609	4	1	16	1	1	323	36.9	5.5
XP_025116467	BOLA class I histocompatibility antigen, alpha chain BL3-6 isoform X4	LOC102402481.2	-0.06	4.609	4	1	16	1	1	307	35.3	5.6
XP_025116341	BOLA class I histocompatibility antigen, alpha chain BL3-7-like isoform X1	LOC102394968	-0.06	4.609	4	1	16	1	1	312	35.7	5.12
XP_025116351	BOLA class I histocompatibility antigen, alpha chain BL3-7 isoform X1	LOC102410916	-0.06	4.609	4	1	16	1	1	369	42.7	6.61
XP_025116384	BOLA class I histocompatibility antigen, alpha chain BL3-6-like isoform X2	LOC102390435.1	-0.06	4.609	4	1	16	1	1	347	39.1	6.27
XP_025116342	BOLA class I histocompatibility antigen, alpha chain BL3-7-like isoform X2	LOC102394968.1	-0.06	4.609	4	1	16	1	1	360	40.9	5.39
XP_006052413	BOLA class I histocompatibility antigen, alpha chain BL3-7 isoform X3	LOC102410916.1	-0.06	4.609	4	1	16	1	1	353	41.4	6.54
XP_025116361	BOLA class I histocompatibility antigen, alpha chain BL3-7 isoform X2	LOC102410916.2	-0.06	4.609	4	1	16	1	1	361	41.8	6.79
XP_006052357	BOLA class I histocompatibility antigen, alpha chain BL3-7-like	LOC102393680	-0.06	4.609	4	1	16	1	1	363	40.9	5.4
XP_025116417	BOLA class I histocompatibility antigen, alpha chain BL3-7	LOC102396583	-0.06	4.609	4	1	16	1	1	361	41	5.66
XP_025116393	BOLA class I histocompatibility antigen, alpha chain BL3-6-like isoform X4	LOC102390435.2	-0.06	4.609	4	1	16	1	1	310	35.2	5.72
XP_025116451	BOLA class I histocompatibility antigen, alpha chain BL3-6 isoform X2	LOC102402481.3	-0.06	4.609	4	1	16	1	1	344	39.2	6.14
XP_025116375	BOLA class I histocompatibility antigen, alpha chain BL3-6-like isoform X1	LOC102390435.3	-0.06	4.609	4	1	16	1	1	363	40.8	6.09
XP_025141927	complement factor H isoform X3	LOC102416626	-0.05	134.089	24	19	255	0	2	963	109.3	7.47
XP_025141924	complement factor H isoform X8	LOC102394267.2	-0.05	109.257	39	19	203	0	2	630	71.5	7.71
XP_025119523	NSFL1 cofactor p47 isoform X1	NSFL1C	-0.05	24.872	17	5	15	5	1	381	41.9	5.26
XP_006049050	NSFL1 cofactor p47 isoform X3	NSFL1C.1	-0.05	24.872	18	5	15	5	1	370	40.6	5.19
XP_006049049	NSFL1 cofactor p47 isoform X2	NSFL1C.2	-0.05	24.872	18	5	15	5	1	372	40.9	5.25
XP_025126645	beta-hexosaminidase subunit beta-like isoform X3	LOC102398732	-0.05	5.174	5	1	12	1	1	331	38	6.6
NP_001277875	peroxiredoxin-1	PRDX1	-0.05	4.123	9	2	4	2	1	199	22.2	8.4
XP_006046707	UPF0160 protein MYG1, mitochondrial	C4H12orf10	-0.05	3.723	5	1	9	1	1	381	42.8	6.64
XP_025141919	complement factor H isoform X3	LOC102394267.3	-0.04	294.93	41	43	462	1	1	1181	133.7	6.86
XP_006062614	cysteine-rich tail protein 1	CYSRT1	-0.04	6.471	14	1	2	1	1	132	13.9	7.81
XP_006044191	angiotensin-converting enzyme isoform X2	LOC102392455.1	-0.03	61.518	8	16	128	16	1	1258	144.7	6.46
XP_006044190	angiotensin-converting enzyme isoform X1	LOC102392455.2	-0.03	61.518	8	16	128	16	1	1306	150.1	6.4
XP_006046626	histone H2B type 2-E-like	LOC102408128	-0.03	16.29	17	2	23	2	1	145	16	9.94
XP_006066860	histone H2B type 1-like	LOC102392466	-0.03	16.29	19	2	23	2	1	126	14	10.37
XP_006048062	histone H2B type 1-J-like	LOC102407809	-0.03	16.29	19	2	23	2	1	126	13.9	10.32
XP_025152033	histone H2B type 1-K	LOC102408478	-0.03	16.29	19	2	23	2	1	126	13.9	10.32
XP_025129711	spermadhesin Z13-like	LOC112577723	-0.02	152.836	45	8	1426	4	1	134	15.3	5.94
XP_006076629	triokinase/FMN cyclase isoform X2	TKFC	-0.02	9.324	5	2	9	2	1	508	52.2	6.21
XP_025129024	cadherin-2	CDH2	-0.01	12.007	4	3	5	3	1	906	99.8	4.79
XP_025123032	glutathione hydrolase 1 proenzyme isoform X1	LOC102412993	-0.01	7.081	4	2	7	2	1	568	60.8	6.37
XP_006048607	alkaline phosphatase, tissue-nonspecific isozyme isoform X1	ALPL	0	27.222	13	5	37	5	1	524	57.2	6.77
XP_025134560	alkaline phosphatase, tissue-nonspecific isozyme isoform X2	ALPL.1	0	21.507	10	3	15	3	1	469	51.1	6.55
XP_025128214	inter-alpha-trypsin inhibitor heavy chain H4 isoform X4	ITIH4	0.01	2.639	1	1	1	1	1	873	97.2	6.67
XP_025128213	inter-alpha-trypsin inhibitor heavy chain H4 isoform X2	ITIH4.1	0.01	2.639	1	1	1	1	1	890	99	6.87
XP_006050309	inter-alpha-trypsin inhibitor heavy chain H4 isoform X5	ITIH4.2	0.01	2.639	1	1	1	1	1	834	93.2	6.39
XP_025141922	complement factor H isoform X6	LOC102394267.4	0.02	292.292	43	42	461	1	1	1122	126.9	6.8
XP_025141923	complement factor H isoform X7	LOC102394267.5	0.02	292.292	45	42	461	1	1	1064	120.7	6.93
XP_025141921	complement factor H isoform X5	LOC102394267.6	0.02	292.292	43	42	461	1	1	1122	127.2	6.64
XP_006072613	plastin-2	LCP1	0.02	22.909	10	4	14	4	1	627	70.1	5.33
XP_006054314	plastin-3	PLS3	0.02	10.666	3	2	6	2	1	630	70.8	5.6
XP_006066229	adhesion G-protein coupled receptor G6 isoform X2	ADGRG6	0.02	5.366	1	1	2	1	1	1246	139	8.13
XP_006066230	adhesion G-protein coupled receptor G6 isoform X3	ADGRG6.1	0.02	5.366	1	1	2	1	1	1219	136.1	8.05
XP_025150257	adhesion G-protein coupled receptor G6 isoform X6	ADGRG6.2	0.02	5.366	1	1	2	1	1	1180	131.5	8.07
XP_025150258	adhesion G-protein coupled receptor G6 isoform X7	ADGRG6.3	0.02	5.366	1	1	2	1	1	1164	130	8.05
XP_025150256	adhesion G-protein coupled receptor G6 isoform X5	ADGRG6.4	0.02	5.366	1	1	2	1	1	1192	133	8.15
XP_025150255	adhesion G-protein coupled receptor G6 isoform X4	ADGRG6.5	0.02	5.366	1	1	2	1	1	1196	133.8	8.16
XP_006066228	adhesion G-protein coupled receptor G6 isoform X1	ADGRG6.6	0.02	5.366	1	1	2	1	1	1247	139.1	8.13
XP_025125065	basal cell adhesion molecule isoform X2	BCAM	0.03	12.128	6	3	18	3	1	588	64.2	6.35
XP_006067608	basal cell adhesion molecule isoform X1	BCAM.1	0.03	12.128	5	3	18	3	1	626	68.5	6.7
XP_006049700	protein FAM3C	FAM3C	0.04	32.257	22	5	34	5	1	227	24.8	8.5
XP_006060739	beta-defensin 119 isoform X1	LOC102413260.1	0.04	5.302	12	1	9	1	1	83	9.8	8.73
XP_006069033	somatostatin	SST	0.04	3.628	9	1	1	1	1	116	12.7	5.52
XP_006067250	LOW QUALITY PROTEIN: calcyphosin	CAPS	0.05	5.66	10	2	5	2	1	189	20.9	4.84
XP_025122635	apolipoprotein A-I isoform X2	APOA1.1	0.06	6.226	10	2	2	2	1	251	29	6.34
XP_006062164	ribonuclease 4-like	LOC102405757	0.07	132.81	41	6	300	6	1	132	15.2	9.23
XP_006063994	vitamin K-dependent protein S	PROS1	0.07	38.133	14	8	72	8	1	675	75.1	5.36
XP_025137198	equatorin isoform X4	EQTN	0.07	4.127	3	1	26	1	1	318	35.7	4.58
XP_006043871	polymeric immunoglobulin receptor	PIGR	0.08	187.505	32	24	186	24	1	757	82.4	6.15
XP_006052270	complement factor I	CFI	0.08	39.535	17	8	22	8	1	618	68.9	7.74
XP_025140038	V-type proton ATPase catalytic subunit A	ATP6V1A	0.08	9.791	4	2	19	2	1	618	68.4	5.58
XP_025126644	beta-hexosaminidase subunit beta-like isoform X2	LOC102398732.1	0.08	8.392	6	2	14	2	1	548	62.4	7.58
XP_025126643	beta-hexosaminidase subunit beta-like isoform X1	LOC102398732.2	0.08	8.392	6	2	14	2	1	548	62.3	7.39
XP_025151786	ribonuclease 4	LOC102414812	0.09	216.654	65	11	652	11	1	147	16.9	8.85
XP_025122250	folate receptor alpha	LOC102390798	0.09	113.716	45	12	162	11	1	241	28.1	8.09
XP_025143935	sortilin isoform X2	SORT1.3	0.09	9.124	4	2	9	2	1	832	91.8	6.06
XP_025143934	sortilin isoform X1	SORT1.4	0.09	9.124	4	2	9	2	1	865	95.3	6.15
XP_006045809	heterogeneous nuclear ribonucleoproteins A2/B1 isoform X2	LOC102389038	0.1	10.133	9	1	5	1	1	301	32.5	8.72
XP_025147061	heterogeneous nuclear ribonucleoproteins A2/B1 isoform X3	HNRNPA2B1	0.1	10.133	9	1	5	1	1	313	33.9	9.03
XP_006045808	heterogeneous nuclear ribonucleoproteins A2/B1 isoform X1	LOC102389038.1	0.1	10.133	8	1	5	1	1	341	36	8.65
XP_025147062	heterogeneous nuclear ribonucleoproteins A2/B1 isoform X4	HNRNPA2B1.1	0.1	10.133	9	1	5	1	1	292	31.9	9.19
XP_025147060	heterogeneous nuclear ribonucleoproteins A2/B1 isoform X1	HNRNPA2B1.2	0.1	10.133	8	1	5	1	1	353	37.4	8.95
XP_006051476	serotransferrin	LOC102402015	0.11	402.15	61	48	617	46	1	704	77.8	7.21
XP_025139695	wnt inhibitory factor 1	WIF1	0.11	29.572	17	5	22	5	1	379	41.5	7.91
XP_006050775	phosphoglycerate kinase 2	PGK2	0.12	345.15	67	40	557	31	1	417	44.8	8.09
XP_006076744	alpha-enolase isoform X2	ENO1	0.12	52.361	30	12	47	12	1	434	47.4	6.46
XP_025119098	double-stranded RNA-binding protein Staufen homolog 1 isoform X1	STAU1.1	0.12	30.732	11	6	15	6	1	677	74	9.45
XP_025119101	double-stranded RNA-binding protein Staufen homolog 1 isoform X4	STAU1.2	0.12	30.732	12	6	15	6	1	583	63.5	9.38
XP_025119105	double-stranded RNA-binding protein Staufen homolog 1 isoform X6	STAU1.3	0.12	30.732	14	6	15	6	1	502	55.4	9.47
XP_006067602	apolipoprotein E	APOE	0.12	22.758	17	5	33	5	1	316	36	5.68
XP_006063582	complement component C9	C9	0.12	12.125	4	2	12	2	1	552	62.4	6
XP_025123308	LOW QUALITY PROTEIN: disintegrin and metalloproteinase domain-containing protein 1a-like	LOC112579917	0.13	92.883	8	12	98	12	1	928	101.1	5.34
XP_006045267	Na(+)/H(+) exchange regulatory cofactor NHE-RF1	SLC9A3R1	0.13	47.011	30	8	30	8	1	368	39.6	5.39
XP_006066929	glutathione peroxidase 6	GPX6	0.13	36.229	27	5	68	3	1	221	25.1	7.77
XP_006045987	T-complex protein 1 subunit eta	CCT7	0.13	31.361	13	4	29	4	1	543	59.3	7.42
XP_006047820	major prion protein-like	PRNP	0.13	13.367	8	2	29	2	1	264	28.7	9.45
XP_025117733	sperm acrosome-associated protein 9 isoform X2	SPACA9	0.13	10.33	14	2	23	2	1	169	19.3	7.52
XP_006062223	sperm acrosome-associated protein 9 isoform X1	SPACA9.1	0.13	10.33	10	2	23	2	1	224	25.1	8.54
XP_006062131	tubulin polymerization-promoting protein family member 2 isoform X2	TPPP2	0.15	129.76	50	18	101	18	1	286	31.2	9.11
XP_006076743	alpha-enolase isoform X1	ENO1.1	0.15	66.427	35	15	58	15	1	434	47.3	6.8
XP_006065879	acrosin-binding protein isoform X1	ACRBP.2	0.16	80.961	20	13	71	13	1	542	61.3	5.02
XP_006065751	beta-microseminoprotein	MSMB	0.16	40.594	26	4	46	4	1	111	12.3	5.12
XP_006047901	small glutamine-rich tetratricopeptide repeat-containing protein alpha isoform X2	SGTA	0.16	30.654	14	4	17	4	1	366	39.6	5.19
XP_006047903	small glutamine-rich tetratricopeptide repeat-containing protein alpha isoform X1	SGTA.1	0.16	30.654	14	4	17	4	1	366	40	6.33
XP_006047904	small glutamine-rich tetratricopeptide repeat-containing protein alpha isoform X3	SGTA.2	0.16	30.654	16	4	17	4	1	313	34.2	4.84
XP_006054058	transthyretin	TTR	0.16	26.486	36	4	26	4	1	147	15.8	5.86
XP_006052461	testis-expressed protein 101 isoform X2	TEX101	0.17	38.087	36	8	45	8	1	253	27.4	6.18
XP_025124999	testis-expressed protein 101 isoform X1	TEX101.1	0.17	38.087	28	8	45	8	1	325	34.9	6.2
XP_025119204	14-3-3 protein beta/alpha	YWHAB	0.17	36.562	19	6	49	1	1	246	28.1	4.83
XP_006080551	endophilin-B1 isoform X4	SH3GLB1	0.17	18.134	9	4	14	4	1	365	40.8	6.2
XP_006080550	endophilin-B1 isoform X3	SH3GLB1.1	0.17	18.134	9	4	14	4	1	386	43.2	5.82
XP_006080549	endophilin-B1 isoform X2	SH3GLB1.2	0.17	18.134	8	4	14	4	1	394	44.2	6.57
XP_006080548	endophilin-B1 isoform X1	SH3GLB1.3	0.17	18.134	8	4	14	4	1	402	45.2	6.35
XP_025118688	heat shock protein 105 kDa isoform X2	HSPH1	0.17	3.41	2	1	1	1	1	817	91.6	5.45
XP_006053749	heat shock protein 105 kDa isoform X1	HSPH1.1	0.17	3.41	2	1	1	1	1	859	96.7	5.41
XP_006053748	heat shock protein 105 kDa isoform X3	HSPH1.2	0.17	3.41	2	1	1	1	1	815	91.9	5.55
XP_025119159	eppin	LOC102391237	0.18	80.954	39	13	44	13	1	237	27	8.25
XP_006068868	glyceraldehyde-3-phosphate dehydrogenase, testis-specific	GAPDHS	0.18	39.39	21	6	31	5	1	401	43.9	8.44
XP_025127559	creatine kinase B-type	CKB	0.18	4.646	3	1	10	1	1	381	42.7	5.78
XP_025119165	trophoblast Kunitz domain protein 1-like isoform X2	LOC102396695	0.18	1.6	3	1	54	1	1	212	23.7	6.43
XP_025120516	tissue factor pathway inhibitor-like	LOC112578930	0.18	1.6	4	1	54	1	1	161	17.7	8
XP_006042664	pancreatic trypsin inhibitor-like isoform X1	LOC102398187	0.18	1.6	5	1	54	1	1	123	14	9.54
XP_006042663	spleen trypsin inhibitor I-like	LOC102397875	0.18	1.6	3	1	54	1	1	176	19.7	8.12
XP_025119167	trophoblast Kunitz domain protein 1-like isoform X2	LOC112578693	0.18	1.6	3	1	54	1	1	180	19.8	9.54
XP_025119166	trophoblast Kunitz domain protein 1-like isoform X1	LOC112578693.1	0.18	1.6	3	1	54	1	1	181	19.8	9.54
XP_006042665	pancreatic trypsin inhibitor-like isoform X2	LOC102398187.1	0.18	1.6	5	1	54	1	1	122	13.9	9.54
XP_025119164	trophoblast Kunitz domain protein 1-like isoform X1	LOC102396695.1	0.18	1.6	3	1	54	1	1	213	23.8	6.43
XP_025120514	trophoblast Kunitz domain protein 1-like	LOC102398726	0.18	1.6	4	1	54	1	1	170	19.1	6.51
XP_006059495	sperm acrosome membrane-associated protein 3	SPACA3	0.19	20.136	28	2	6	2	1	163	18.1	5.49
XP_006078738	hypoxia up-regulated protein 1 isoform X2	HYOU1	0.19	16.019	6	4	7	4	1	1002	111.4	5.29
XP_025122575	hypoxia up-regulated protein 1 isoform X1	HYOU1.1	0.19	16.019	6	4	7	4	1	1001	111.4	5.29
XP_006061630	fibrinogen beta chain, partial	FGB	0.2	6.147	4	2	2	2	1	514	58.5	8.35
XP_006069410	LOW QUALITY PROTEIN: vitamin D-binding protein	GC	0.21	141.655	29	20	290	20	1	474	53.3	5.71
XP_006050920	stress-induced-phosphoprotein 1	STIP1	0.21	80.472	28	11	53	11	1	543	62.5	6.43
XP_006050774	cysteine-rich secretory protein 3	LOC102394104	0.21	38.82	18	7	66	7	1	244	27.5	8.28
XP_006053316	transforming protein RhoA	RHOA	0.21	18.151	27	5	22	5	1	193	21.8	6.1
XP_006068700	keratin, type I cytoskeletal 10 isoform X2	KRT10	0.21	12.15	7	4	16	4	1	538	55.9	5.07
XP_025135946	keratin, type I cytoskeletal 10 isoform X1	KRT10.1	0.21	12.15	7	4	16	4	1	578	60.5	5.12
XP_025130327	platelet-derived growth factor subunit A isoform X1	PDGFA	0.21	9.398	12	2	6	2	1	214	24.3	9.79
XP_025130328	platelet-derived growth factor subunit A isoform X2	PDGFA.1	0.21	9.398	12	2	6	2	1	211	24	9.41
XP_025135947	LOW QUALITY PROTEIN: keratin, type I cytoskeletal 28	KRT28	0.21	3.882	3	2	9	2	1	507	55.3	5.73
XP_006057191	heat shock protein beta-1	HSPB1	0.21	2.735	8	1	1	1	1	201	22.4	6.4
XP_006054757	C-type natriuretic peptide	NPPC	0.22	121.968	52	12	375	12	1	126	13.3	10.2
XP_006073624	N-acetylglucosamine-6-sulfatase	GNS	0.22	29.958	13	6	56	6	1	558	62.5	8.43
XP_006070551	fructose-bisphosphate aldolase A isoform X1	ALDOA	0.23	83.992	31	13	69	13	1	416	45.1	8.28
XP_006070553	fructose-bisphosphate aldolase A isoform X2	ALDOA.1	0.23	83.992	36	13	69	13	1	364	39.4	8.19
XP_006070120	succinate--CoA ligase [GDP-forming] subunit beta, mitochondrial isoform X1	SUCLG2	0.23	6.168	3	1	2	1	1	432	46.6	7.62
XP_025128866	succinate--CoA ligase [GDP-forming] subunit beta, mitochondrial isoform X2	SUCLG2.1	0.23	6.168	4	1	2	1	1	401	43.4	7.21
XP_025143019	vesicle-associated membrane protein 3	VAMP3	0.25	55.84	35	5	97	5	1	104	11.6	8.79
XP_025119102	double-stranded RNA-binding protein Staufen homolog 1 isoform X5	STAU1.4	0.26	33.616	14	7	25	7	1	577	62.9	9.38
XP_025119106	double-stranded RNA-binding protein Staufen homolog 1 isoform X7	STAU1.5	0.26	33.616	17	7	25	7	1	496	54.7	9.47
XP_025119099	double-stranded RNA-binding protein Staufen homolog 1 isoform X2	STAU1.6	0.26	33.616	12	7	25	7	1	671	73.4	9.45
XP_006060379	hexokinase-1 isoform X1	HK1	0.26	12.67	5	4	19	4	1	917	102.2	6.71
XP_025140432	hexokinase-1 isoform X2	HK1.1	0.26	12.67	5	4	19	4	1	921	102.5	6.64
XP_006061741	LOW QUALITY PROTEIN: amyloid-like protein 2	APLP2	0.26	4.307	3	2	2	1	1	764	86.6	4.81
XP_006074457	calumenin isoform X1	CALU	0.26	1.631	2	1	1	1	1	315	37.1	4.64
XP_025147270	calumenin isoform X2	CALU.1	0.26	1.631	2	1	1	1	1	315	37.1	4.59
XP_006069475	double-headed protease inhibitor, submandibular gland-like	LOC102400278	0.27	114.612	69	11	286	11	1	144	15.8	6.48
XP_006046494	14-3-3 protein zeta/delta	YWHAZ	0.28	161.042	54	18	234	14	1	245	27.7	4.79
XP_006041613	UV excision repair protein RAD23 homolog A isoform X1	RAD23A	0.28	11.912	8	1	4	1	1	363	39.7	4.58
XP_006041614	UV excision repair protein RAD23 homolog A isoform X2	RAD23A.1	0.28	11.912	8	1	4	1	1	362	39.6	4.58
XP_006043860	ubiquitin thioesterase OTU1 isoform X1	YOD1	0.28	4.076	5	2	2	2	1	348	38.1	5.58
XP_025133518	ubiquitin thioesterase OTU1 isoform X2	YOD1.1	0.28	4.076	5	2	2	2	1	321	35.7	4.93
XP_006067029	45 kDa calcium-binding protein	SDF4	0.29	31.447	21	6	30	6	1	355	41.1	4.91
XP_025143733	histone H2B type 2-E-like	LOC102413428	0.29	17.92	26	3	24	3	1	126	13.9	10.32
XP_006048087	histone H2B type 1-B	LOC102389499	0.29	17.92	26	3	24	3	1	126	13.9	10.32
XP_006042841	histone H2B type 1-like	LOC102398832	0.29	17.92	26	3	24	3	1	126	13.7	10.17
XP_006049257	histone H2B type 2-F	LOC102411450	0.29	17.92	26	3	24	3	1	126	13.9	10.32
XP_025149113	histone H2B type 1-like	LOC102410329	0.29	17.92	26	3	24	3	1	125	13.9	10.21
XP_006076308	histone H2B type 1-like	LOC102412582	0.29	17.92	26	3	24	3	1	126	13.9	10.1
XP_006048078	histone H2B type 1	LOC102413318	0.29	17.92	26	3	24	3	1	126	13.9	10.32
XP_025152060	histone H2B type 1-like	LOC102410005	0.29	17.92	26	3	24	3	1	126	13.9	10.32
XP_006045701	histone H2B type 1-N	LOC102409993	0.29	17.92	26	3	24	3	1	126	13.9	10.32
XP_006048073	histone H2B type 1-like	LOC102411322	0.29	17.92	26	3	24	3	1	126	13.9	10.32
XP_006063275	histone H2B type 3-B	LOC102404341	0.29	17.92	26	3	24	3	1	126	13.9	10.32
XP_025152011	histone H2B type 1-M	LOC102409122	0.29	17.92	26	3	24	3	1	126	13.9	10.32
XP_006049265	histone H2B type 2-E	LOC102414399	0.29	17.92	26	3	24	3	1	126	13.9	10.32
XP_006050378	prefoldin subunit 6	PFDN6	0.29	12.151	12	2	11	2	1	129	14.5	8.32
XP_025116391	prominin-2 isoform X3	PROM2	0.29	2.707	2	1	2	1	1	488	54.8	5.62
XP_025116388	prominin-2 isoform X1	PROM2.1	0.29	2.707	1	1	2	1	1	833	91.5	6.49
XP_025116390	prominin-2 isoform X2	PROM2.2	0.29	2.707	1	1	2	1	1	655	72.7	5.62
XP_006076733	protein/nucleic acid deglycase DJ-1	PARK7	0.3	129.896	80	15	153	15	1	189	20	7.33
XP_025142557	beta-galactoside alpha-2,6-sialyltransferase 1 isoform X2	ST6GAL1	0.3	56.561	32	13	38	13	1	372	42.6	9.17
XP_025142549	beta-galactoside alpha-2,6-sialyltransferase 1 isoform X1	ST6GAL1.1	0.3	56.561	29	13	38	13	1	405	46.3	8.95
XP_006060155	proteasome subunit beta type-6	PSMB6	0.3	12.874	13	3	25	3	1	239	25.4	4.92
XP_006041952	heat shock 70 kDa protein 1-like	HSPA1L	0.31	128.788	26	16	145	12	1	641	70.3	6.2
XP_006065854	vesicle-associated membrane protein 1 isoform X2	VAMP1	0.31	21.952	16	3	26	3	1	118	12.8	6.65
XP_025138858	vesicle-associated membrane protein 1 isoform X1	VAMP1.1	0.31	21.952	10	3	26	3	1	188	20.7	10.61
XP_006062958	vesicle-associated membrane protein 2	VAMP2	0.31	21.952	16	3	26	3	1	116	12.6	8.13
XP_006077557	tetranectin	CLEC3B	0.31	6.115	10	1	1	1	1	202	22.1	5.43
XP_006041196	heat shock 70 kDa protein 6	HSPA6	0.31	3.273	2	1	3	0	4	643	70.9	6.1
XP_025136699	glyoxalase domain-containing protein 4 isoform X1	GLOD4	0.32	29.327	15	5	34	5	1	339	38.3	6.68
XP_006052771	glyoxalase domain-containing protein 4 isoform X2	GLOD4.1	0.32	29.327	17	5	34	5	1	298	33.4	5.77
XP_025147802	SRSF protein kinase 2 isoform X5	SRPK2	0.32	2.415	1	1	1	1	1	734	82.8	5.36
XP_025147798	SRSF protein kinase 2 isoform X1	SRPK2.1	0.32	2.415	1	1	1	1	1	765	86.5	5.55
XP_025147806	SRSF protein kinase 2 isoform X9	SRPK2.2	0.32	2.415	1	1	1	1	1	710	80.4	5.15
XP_025147808	SRSF protein kinase 2 isoform X11	SRPK2.3	0.32	2.415	1	1	1	1	1	697	78.9	5.26
XP_025147807	SRSF protein kinase 2 isoform X10	SRPK2.4	0.32	2.415	1	1	1	1	1	717	81.1	5.11
XP_025147801	SRSF protein kinase 2 isoform X4	SRPK2.5	0.32	2.415	1	1	1	1	1	734	82.8	5.36
XP_025147800	SRSF protein kinase 2 isoform X3	SRPK2.6	0.32	2.415	1	1	1	1	1	754	85.4	5.38
XP_025147809	SRSF protein kinase 2 isoform X12	SRPK2.7	0.32	2.415	1	1	1	1	1	674	75.8	5.31
XP_025147804	SRSF protein kinase 2 isoform X7	SRPK2.8	0.32	2.415	1	1	1	1	1	728	82.6	5.43
XP_025147799	SRSF protein kinase 2 isoform X2	SRPK2.9	0.32	2.415	1	1	1	1	1	760	86.3	5.11
XP_025147810	SRSF protein kinase 2 isoform X13	SRPK2.10	0.32	2.415	1	1	1	1	1	619	70.2	5.21
XP_025147805	SRSF protein kinase 2 isoform X8	SRPK2.11	0.32	2.415	1	1	1	1	1	723	81.8	5.21
XP_025147803	SRSF protein kinase 2 isoform X6	SRPK2.12	0.32	2.415	1	1	1	1	1	733	82.7	5.06
XP_025124026	immunoglobulin lambda-like polypeptide 1	IGLL1	0.33	59.017	10	5	97	5	1	344	36.9	9.96
XP_025122971	tubulin alpha-3 chain	LOC102413407	0.33	30.118	15	5	18	5	1	450	49.9	5.1
XP_025139867	tubulin alpha-1C chain	LOC102405836	0.33	10.198	7	3	10	3	1	449	49.9	5.06
XP_025139868	tubulin alpha-1C chain	LOC112584592	0.33	10.198	7	3	10	3	1	449	49.8	5.1
XP_006048131	adenosylhomocysteinase	AHCY	0.33	8.729	9	3	3	3	1	432	47.6	6.29
XP_006053930	NPC intracellular cholesterol transporter 2	NPC2	0.34	274.12	71	16	1319	16	1	149	16.6	7.99
XP_006057176	LOW QUALITY PROTEIN: huntingtin-interacting protein 1	HIP1	0.34	57.216	14	10	43	10	1	1037	116.4	5.47
XP_006069596	disintegrin and metalloproteinase domain-containing protein 7 isoform X2	ADAM7	0.34	17.454	4	3	24	3	1	780	88.5	6.67
XP_025137666	disintegrin and metalloproteinase domain-containing protein 7 isoform X1	ADAM7.1	0.34	17.454	4	3	24	3	1	802	91.1	6.76
XP_025146597	zona pellucida-binding protein 1 isoform X7	ZPBP	0.35	9.705	9	3	44	3	1	315	35.3	7.8
XP_025146598	zona pellucida-binding protein 1 isoform X8	ZPBP.1	0.35	9.705	10	3	44	3	1	288	32.7	6.83
XP_006079668	histone H2B type 2-E-like	LOC102395743	0.35	5.591	14	2	17	2	1	126	13.9	10.13
XP_025146655	histone H2B type 1-like isoform X1	LOC102413516	0.35	5.591	13	2	17	2	1	136	14.9	9.83
XP_006051280	histone H2B type 1-A	LOC102394425	0.35	5.591	14	2	17	2	1	127	14.2	10.24
XP_025150009	histone H2B type 1-L-like	LOC112587290	0.35	5.591	11	2	17	2	1	158	18.2	10.23
XP_025127773	histone H2B type 1-like	LOC102408153	0.35	5.591	14	2	17	2	1	126	13.8	10.11
XP_025147624	late histone H2B.L4-like	LOC112586636	0.35	5.591	15	2	17	2	1	122	13.6	10.54
XP_025136898	histone H2B type 1-like	LOC112583797	0.35	5.591	14	2	17	2	1	126	13.8	10.07
XP_006065981	histone H2B type 1-like isoform X2	LOC102413516.1	0.35	5.591	14	2	17	2	1	133	14.8	10.1
XP_006054502	proteasome subunit alpha type-1 isoform X2	PSMA1	0.36	36.353	18	4	37	4	1	263	29.6	6.61
XP_025122477	proteasome subunit alpha type-1 isoform X1	PSMA1.1	0.36	36.353	18	4	37	4	1	271	30.3	6.62
XP_006066761	aquaporin-7 isoform X1	AQP7	0.36	14.015	8	1	10	1	1	330	35.9	9.28
XP_025137687	aquaporin-7 isoform X3	AQP7.1	0.36	14.015	9	1	10	1	1	298	32.1	8.44
XP_006066762	aquaporin-7 isoform X2	AQP7.2	0.36	14.015	9	1	10	1	1	306	33.2	7.93
XP_006057428	26S proteasome regulatory subunit 6A isoform X1	PSMC3	0.36	12.768	10	3	11	3	1	440	49.3	5.29
XP_025121863	26S proteasome regulatory subunit 6A isoform X2	PSMC3.1	0.36	12.768	11	3	11	3	1	394	44	5.74
XP_006061632	fibrinogen gamma chain isoform X1	FGG	0.36	9.687	8	2	3	2	1	443	50.4	5.82
XP_006061633	fibrinogen gamma chain isoform X2	FGG.1	0.36	9.687	8	2	3	2	1	435	49.3	5.99
XP_025117958	dipeptidyl peptidase 2 isoform X2	DPP7	0.36	7.049	3	1	7	1	1	460	50.3	5.54
XP_006062602	dipeptidyl peptidase 2 isoform X1	DPP7.1	0.36	7.049	3	1	7	1	1	488	53.6	5.47
XP_006048613	elongation factor 1-alpha 2	EEF1A2	0.36	3.235	2	1	4	1	1	463	50.4	9.03
XP_006054002	LOW QUALITY PROTEIN: elongation factor 1-alpha, oocyte form	LOC102409600	0.36	3.235	2	1	4	1	1	461	50.1	9.33
XP_025133680	elongation factor 1-alpha 1	LOC102389646	0.36	3.235	2	1	4	1	1	462	50.1	9.01
XP_025134019	LOW QUALITY PROTEIN: disintegrin and metalloproteinase domain-containing protein 32	ADAM32	0.37	73.199	12	7	128	7	1	746	82.4	5.29
XP_006064717	cytosolic non-specific dipeptidase	CNDP2	0.37	16.339	16	4	10	4	1	475	52.6	6
XP_006046329	beta-2-glycoprotein 1	APOH	0.37	11.006	9	2	7	2	1	345	38.1	8.29
XP_006060548	sodium/potassium-transporting ATPase subunit alpha-4	ATP1A4	0.37	10.059	3	2	6	2	1	1030	113.7	6.57
XP_006065122	serine/threonine-protein phosphatase 2A 65 kDa regulatory subunit A alpha isoform	PPP2R1A	0.37	9.858	5	2	3	2	1	589	65.2	5.11
XP_006041550	keratin, type I cuticular Ha2	KRT32	0.37	2.089	2	1	8	1	1	405	46.5	4.82
XP_006041556	keratin, type I cytoskeletal 19	KRT19	0.37	2.089	2	1	8	1	1	399	43.9	5.01
XP_006041549	keratin, type I microfibrillar 48 kDa, component 8C-1	LOC102389471	0.37	2.089	2	1	8	1	1	416	47.1	4.83
XP_006041548	keratin, type I microfibrillar 48 kDa, component 8C-1-like	LOC102389131	0.37	2.089	2	1	8	1	1	405	45.8	4.82
XP_006041558	LOW QUALITY PROTEIN: keratin, type I cuticular Ha8	LOC102392881	0.37	2.089	2	1	8	1	1	430	47.9	5.03
XP_006068701	LOW QUALITY PROTEIN: keratin, type I cytoskeletal 12	KRT12	0.37	2.089	1	1	8	1	1	517	55.6	4.74
XP_006068696	keratin, type I cytoskeletal 24 isoform X1	KRT24	0.37	2.089	1	1	8	1	1	525	54.9	4.89
XP_006041559	keratin, type I cuticular Ha8	LOC102393197	0.37	2.089	2	1	8	1	1	444	49.5	4.91
XP_006055849	keratin, type I cytoskeletal 42	LOC102397719	0.37	2.089	2	1	8	1	1	452	50.2	5.21
XP_006041551	LOW QUALITY PROTEIN: keratin, type I cuticular Ha5	KRT35	0.37	2.089	2	1	8	1	1	455	50.4	5
XP_006041552	keratin, type I cuticular Ha6	KRT36	0.37	2.089	2	1	8	1	1	456	51.1	5.06
XP_006055848	keratin, type I cytoskeletal 17	LOC102397396	0.37	2.089	2	1	8	1	1	440	48.7	5.2
XP_006043425	keratin, type I cytoskeletal 40	KRT40	0.37	2.089	2	1	8	1	1	431	47.7	4.34
XP_025135949	keratin, type I cytoskeletal 24 isoform X2	KRT24.1	0.37	2.089	2	1	8	1	1	439	47.9	4.92
XP_006046668	keratin, type I cytoskeletal 18	KRT18	0.37	2.089	2	1	8	1	1	429	47.9	5.44
XP_006055851	keratin, type I cytoskeletal 14	LOC102398359	0.37	2.089	1	1	8	1	1	477	51.9	5.16
NP_001277861	actin, cytoplasmic 1	ACTB	0.38	94.652	25	11	90	11	1	375	41.6	5.3
XP_006056431	coagulation factor V isoform X1	F5	0.4	18.721	3	4	33	4	1	2120	239.8	6.11
XP_006056432	coagulation factor V isoform X2	F5.1	0.4	18.721	3	4	33	4	1	2115	239.2	6.11
XP_025150607	NADP-dependent malic enzyme	ME1	0.4	9.782	6	2	11	2	1	571	64	6.7
NP_001277902	superoxide dismutase [Cu-Zn]	SOD1	0.41	71.019	38	5	172	5	1	152	15.7	6.52
XP_006054278	melanotransferrin isoform X1	MELTF	0.42	464.754	61	42	715	42	1	746	81.4	6.13
XP_006054279	melanotransferrin isoform X2	MELTF.1	0.42	464.754	61	42	715	42	1	745	81.3	6.13
XP_006058681	fetuin-B	FETUB	0.42	207.901	50	23	561	23	1	387	42.5	5.77
XP_006051316	T-complex protein 1 subunit alpha	TCP1	0.42	81.983	27	13	65	13	1	556	60.3	5.99
XP_006058445	T-complex protein 1 subunit beta	CCT2	0.43	95.325	36	16	103	16	1	535	57.4	6.64
XP_006058439	lysozyme C, milk isozyme	LOC102404841	0.43	42.762	26	4	15	3	1	167	18.5	9.8
XP_025134937	clusterin-like	LOC102393597	0.43	5.84	6	1	20	1	1	214	24.4	8.43
XP_025142305	secretoglobin family 1D member isoform X2	LOC102395773	0.44	209.069	67	16	1670	16	1	101	11.3	8.47
XP_025141292	laminin subunit gamma-1	LAMC1	0.44	22.494	4	4	17	4	1	1608	177.6	5.17
XP_006054596	tubulin alpha-1B chain	LOC102399969	0.44	22.186	12	4	16	4	1	451	50.1	5.06
XP_025139866	tubulin alpha-1A chain	LOC102414462	0.44	22.186	12	4	16	4	1	451	50.1	5.06
XP_006059042	tubulin alpha-1D chain	LOC102397197	0.44	22.186	12	4	16	4	1	452	50.3	5.03
XP_025150098	plasminogen	PLG	0.44	9.405	4	1	6	1	1	806	90.3	7.52
XP_025143006	mucin-6	MUC6	0.45	159.091	10	17	238	17	1	2841	305.6	6.93
XP_025135407	metalloproteinase inhibitor 2	TIMP2	0.45	43.53	27	8	61	8	1	220	24.3	7.47
XP_006046927	neprilysin isoform X2	MME	0.45	34.26	10	8	17	8	1	750	85.9	5.95
XP_025145296	neprilysin isoform X1	MME.1	0.45	34.26	10	8	17	8	1	775	88.7	5.87
XP_006073847	14-3-3 protein theta	YWHAQ	0.45	9.389	11	3	33	1	1	245	27.7	4.78
XP_025136030	importin subunit beta-1	KPNB1	0.45	3.374	1	1	2	1	1	876	97.2	4.78
XP_006063116	actin, alpha skeletal muscle	ACTA1	0.46	93.172	22	11	178	11	1	377	42	5.39
XP_006044050	actin, alpha cardiac muscle 1	ACTC1	0.46	93.172	22	11	178	11	1	377	42	5.39
XP_006058509	LOW QUALITY PROTEIN: actin, aortic smooth muscle	ACTA2	0.46	93.172	22	11	178	11	1	377	42	5.39
XP_006046012	actin, gamma-enteric smooth muscle	ACTG2	0.46	93.172	22	11	178	11	1	376	41.9	5.48
XP_025151956	histone H2A type 1	LOC112587908	0.46	18.443	30	3	27	2	1	130	14.1	10.9
XP_006049262	histone H2A type 2-A	LOC102413094	0.46	18.443	30	3	27	2	1	130	14.1	10.9
XP_006048063	histone H2A type 1-H	LOC102408136	0.46	18.443	30	3	27	2	1	128	13.9	10.89
XP_006055195	histone H2A.J	LOC102402131	0.46	18.443	30	3	27	2	1	129	14	10.9
XP_006049266	histone H2A type 2-C	LOC102414738	0.46	18.443	30	3	27	2	1	129	14	10.9
XP_025151913	histone H2A type 1-D	LOC112587905	0.46	18.443	30	3	27	2	1	130	14.1	10.9
XP_025151963	histone H2A type 1-J	LOC102400351	0.46	18.443	30	3	27	2	1	128	13.9	10.89
XP_006073660	clathrin light chain A isoform X3	CLTA	0.46	15.794	22	4	10	4	1	213	23.4	4.53
XP_006052426	vimentin	VIM	0.46	11.093	5	2	4	2	1	466	53.7	5.12
XP_025141926	complement factor H isoform X2	LOC102416626.1	0.47	166.805	30	24	320	1	1	991	112.6	7.46
XP_025141925	complement factor H isoform X1	LOC102416626.2	0.47	148.203	29	23	313	1	1	1021	116.1	7.56
XP_025141929	complement factor H isoform X5	LOC102416626.3	0.47	148.203	32	23	313	1	1	897	101.5	7.34
XP_025141930	complement factor H isoform X6	LOC102416626.4	0.47	144.723	36	22	290	1	1	778	88.5	7.74
XP_025141928	complement factor H isoform X4	LOC102416626.5	0.47	141.063	30	21	259	1	1	902	102.6	7.42
XP_006048651	sulfhydryl oxidase 1 isoform X1	QSOX1	0.47	91.857	18	16	117	16	1	887	96.3	9.16
XP_006049591	alpha-1-antitrypsin	SERPINA1	0.47	44.199	16	7	55	7	1	416	45.9	6.43
XP_025134091	aspartyl aminopeptidase isoform X3	DNPEP	0.47	5.257	3	1	10	1	1	471	51.8	6.92
XP_025134090	aspartyl aminopeptidase isoform X1	DNPEP.1	0.47	5.257	2	1	10	1	1	509	55.9	6.71
XP_006059032	aspartyl aminopeptidase isoform X2	DNPEP.2	0.47	5.257	3	1	10	1	1	475	52.2	6.92
XP_025142068	leucine zipper protein 2 isoform X1	LUZP2	0.48	64.786	37	15	53	15	1	350	40.1	6.37
XP_025142069	leucine zipper protein 2 isoform X2	LUZP2.1	0.48	64.786	41	15	53	15	1	318	36.5	8.02
XP_006064816	leucine zipper protein 2 isoform X3	LUZP2.2	0.48	52.57	39	13	41	13	1	264	30.1	5.62
XP_025135408	galectin-3-binding protein isoform X1	LGALS3BP	0.48	17.636	6	2	20	2	1	558	62.5	5.44
XP_006064180	galectin-3-binding protein isoform X2	LGALS3BP.1	0.48	17.636	6	2	20	2	1	555	62.2	5.52
XP_025133338	ectonucleotide pyrophosphatase/phosphodiesterase family member 2-like	LOC112582673	0.48	2.032	4	1	6	1	1	236	27.1	5.83
XP_006052615	alcohol dehydrogenase [NADP(+)] isoform X3	AKR1A1	0.49	2.312	3	1	1	1	1	325	36.6	7.83
XP_006052617	alcohol dehydrogenase [NADP(+)] isoform X2	AKR1A1.1	0.49	2.312	3	1	1	1	1	359	40	7.53
XP_025141920	complement factor H isoform X4	LOC102394267.7	0.5	308.219	43	44	503	2	1	1179	133.6	6.89
XP_006080636	N(4)-(beta-N-acetylglucosaminyl)-L-asparaginase	AGA	0.5	57.027	41	11	40	11	1	346	37	6.4
XP_025130195	serine protease HTRA1	HTRA1	0.5	33.37	12	6	80	6	1	527	55.9	8.35
XP_025121222	histone H3.3C	LOC102402179	0.5	16.376	43	4	9	1	1	136	15.4	11.49
XP_006046136	histone H3.3	LOC102406199	0.5	16.376	43	4	9	1	1	136	15.3	11.27
XP_025126790	histone H3.3-like	LOC112580793	0.5	14.269	37	3	6	1	1	136	15.2	11.14
XP_025147992	histone H3.3-like	LOC102410792	0.5	14.269	37	3	6	1	1	136	15.3	10.99
XP_006068270	ubiquitin carboxyl-terminal hydrolase isozyme L1	UCHL1	0.51	41.762	46	7	47	7	1	223	24.9	5.16
XP_006076628	triokinase/FMN cyclase isoform X1	TKFC.1	0.51	28.665	10	4	12	4	1	578	59.2	6.93
XP_006046025	ADP-ribose pyrophosphatase, mitochondrial isoform X1	NUDT9	0.51	18.738	13	4	19	4	1	349	38.7	8.28
XP_006046027	ADP-ribose pyrophosphatase, mitochondrial isoform X2	NUDT9.1	0.51	18.738	15	4	19	4	1	300	33.9	7.28
XP_006042302	tripeptidyl-peptidase 2 isoform X1	TPP2	0.51	18.66	4	5	27	5	1	1262	139.7	6.49
XP_006042303	tripeptidyl-peptidase 2 isoform X2	TPP2.1	0.51	18.66	4	5	27	5	1	1249	138.3	6.29
XP_025118388	tripeptidyl-peptidase 2 isoform X3	TPP2.2	0.51	18.66	4	5	27	5	1	1137	125.6	6.9
XP_025147573	GTPase IMAP family member 7-like	LOC102398005	0.51	1.33	3	1	5	1	1	296	33.7	8.02
XP_006052463	seminal plasma protein A3	SPA3	0.52	40.714	33	5	59	5	1	140	16.2	6.92
XP_006041955	heat shock 70 kDa protein 1A	LOC102409533	0.52	30.193	10	6	54	4	1	641	70.2	5.92
XP_006077974	protein OS-9 isoform X3	OS9	0.52	29.381	8	5	52	5	1	624	70.6	4.84
XP_006077975	protein OS-9 isoform X4	OS9.1	0.52	29.381	8	5	52	5	1	612	69.4	4.86
XP_006064635	copper homeostasis protein cutC homolog isoform X1	CUTC.1	0.52	5.724	9	3	9	3	1	273	29.3	8.25
XP_025130110	copper homeostasis protein cutC homolog isoform X2	CUTC.2	0.52	5.724	10	3	9	3	1	249	26.8	8.97
XP_006050308	inter-alpha-trypsin inhibitor heavy chain H4 isoform X3	ITIH4.3	0.52	4.183	3	2	2	2	1	887	98.8	6.71
XP_006050307	inter-alpha-trypsin inhibitor heavy chain H4 isoform X1	ITIH4.4	0.52	4.183	3	2	2	2	1	904	100.6	6.9
XP_025142397	peroxiredoxin-5, mitochondrial isoform X2	PRDX5	0.53	53.742	36	6	195	6	1	174	18.6	7.83
XP_006060303	cathepsin B isoform X1	CTSB	0.53	2.535	3	1	2	1	1	335	36.7	6.06
NP_001277795	fructose-1,6-bisphosphatase isozyme 2	FBP2	0.54	9.39	3	1	16	1	1	339	36.7	7.66
XP_006050985	nucleobindin-1	NUCB1	0.55	107.713	46	18	125	17	1	457	53.2	5.14
XP_006062132	tubulin polymerization-promoting protein family member 2 isoform X3	TPPP2.1	0.55	106.881	41	16	93	16	1	282	30.9	8.92
XP_025151807	tubulin polymerization-promoting protein family member 2 isoform X4	TPPP2.2	0.55	106.881	50	16	93	16	1	232	25.7	8.6
XP_025151806	tubulin polymerization-promoting protein family member 2 isoform X1	TPPP2.3	0.55	106.881	37	16	93	16	1	314	34.6	9.04
XP_025150005	ubiquitin	LOC112587282	0.55	38.835	43	4	40	4	1	129	14.6	6
XP_025134772	polyubiquitin-B isoform X1	UBB	0.55	38.835	44	4	40	4	1	393	43.8	9.33
XP_006050061	polyubiquitin-C	UBC	0.55	38.835	55	4	40	4	1	918	103.1	7.69
XP_006075619	ubiquitin-60S ribosomal protein L40	LOC102399966	0.55	38.835	34	4	40	4	1	128	14.7	9.83
XP_025128789	polyubiquitin-B	LOC112581264	0.55	38.835	56	4	40	4	1	305	34.3	7.47
XP_025116830	ubiquitin-40S ribosomal protein S27a isoform X2	RPS27A	0.55	38.835	28	4	40	4	1	156	18	9.64
XP_025116829	ubiquitin-40S ribosomal protein S27a isoform X1	RPS27A.1	0.55	38.835	21	4	40	4	1	205	23	9.77
XP_025128865	LOW QUALITY PROTEIN: epidermal growth factor receptor	EGFR	0.55	25.288	5	5	13	5	1	1240	137.2	7.44
XP_025137484	histidine triad nucleotide-binding protein 2, mitochondrial isoform X2	HINT2	0.55	16.085	34	3	21	3	1	151	16.5	9.33
XP_006064441	histidine triad nucleotide-binding protein 2, mitochondrial isoform X1	HINT2.1	0.55	16.085	31	3	21	3	1	163	17.2	8.88
XP_006058190	cathepsin S	CTSS	0.55	9.06	10	2	20	2	1	331	37.2	7.44
XP_025149456	relaxin-3	RLN3	0.56	32.267	39	6	67	6	1	135	14.8	7.68
XP_006055340	cytochrome c	LOC102391189	0.56	12.528	40	4	18	2	1	105	11.7	9.5
XP_006074671	hepatocyte growth factor activator isoform X2	HGFAC	0.56	2.337	1	1	1	1	1	723	77.3	7.94
XP_025130274	actin, cytoplasmic 1 isoform X1	ACTB.1	0.57	128.563	34	14	222	14	1	375	41.7	5.48
XP_025135478	actin, cytoplasmic 2	ACTG1	0.57	128.563	34	14	222	14	1	375	41.8	5.48
XP_025143366	CD5 antigen-like isoform X3	CD5L.1	0.6	21.004	8	3	17	3	1	665	73.8	5.05
XP_025143365	CD5 antigen-like isoform X2	CD5L.2	0.6	21.004	8	3	17	3	1	669	74.1	5.05
XP_006046381	proteasome subunit alpha type-2	PSMA2	0.6	15.708	23	4	8	4	1	234	25.9	7.43
XP_025145659	ecto-ADP-ribosyltransferase 3 isoform X1	ART3.1	0.6	1.858	2	1	4	1	1	427	49.4	6.35
XP_025145667	ecto-ADP-ribosyltransferase 3 isoform X6	ART3.2	0.6	1.858	3	1	4	1	1	363	42	5.72
XP_025145668	ecto-ADP-ribosyltransferase 3 isoform X7	ART3.3	0.6	1.858	3	1	4	1	1	355	41.1	5.59
XP_025145664	ecto-ADP-ribosyltransferase 3 isoform X4	ART3.4	0.6	1.858	2	1	4	1	1	401	46.4	6.35
XP_025145661	ecto-ADP-ribosyltransferase 3 isoform X3	ART3.5	0.6	1.858	2	1	4	1	1	405	45.8	5.5
XP_025145666	ecto-ADP-ribosyltransferase 3 isoform X5	ART3.6	0.6	1.858	3	1	4	1	1	395	44.6	5.74
XP_006060035	LOW QUALITY PROTEIN: low-density lipoprotein receptor-related protein 2	LRP2	0.61	26.138	2	6	14	6	1	4649	519.3	5.27
XP_006051315	acetyl-CoA acetyltransferase, cytosolic	ACAT2	0.61	6.156	7	1	1	1	1	397	41.2	6.98
XP_025145140	histone H2B type 1-like	LOC102392042	0.62	3.961	8	1	16	1	1	116	12.8	10.36
XP_025146238	epididymis-specific alpha-mannosidase	LOC102396650	0.63	61.344	11	12	77	10	1	1223	139.2	7.74
XP_006043909	proteasome subunit alpha type-6 isoform X1	PSMA6	0.63	38.606	36	7	59	7	1	246	27.4	6.76
XP_006077972	protein OS-9 isoform X2	OS9.2	0.63	35.947	9	6	53	6	1	667	75.8	4.91
XP_006077971	protein OS-9 isoform X1	OS9.3	0.63	35.947	9	6	53	6	1	679	77	4.89
XP_006065877	lysophosphatidic acid receptor 5	LPAR5	0.63	1.46	2	1	2	1	1	367	40.6	9.52
XP_006060322	clusterin	CLU	0.64	490.214	51	36	1487	36	1	439	51	6.07
XP_025134134	glia-derived nexin	SERPINE2	0.64	99.475	30	17	195	17	1	397	43.8	9.52
XP_006050021	hemoglobin subunit alpha-4	HBA1	0.64	9.094	11	1	14	1	1	142	15.2	8.94
XP_006050022	hemoglobin subunit alpha-2	LOC102398760	0.64	9.094	11	1	14	1	1	142	15.2	8.46
XP_006080923	T-complex protein 1 subunit delta	CCT4	0.65	76.907	30	15	101	15	1	545	58.4	7.61
XP_025122255	ecto-ADP-ribosyltransferase 5-like isoform X2	LOC102399593.1	0.65	69.711	28	7	124	1	1	309	33.8	7.09
XP_006046918	pancreatic prohormone	PPY	0.65	11.203	21	1	2	1	1	95	10.5	5.85
XP_006073657	clathrin light chain A isoform X1	CLTA.1	0.65	6.272	11	3	7	3	1	243	26.8	4.51
XP_006073658	clathrin light chain A isoform X2	CLTA.2	0.65	6.272	12	3	7	3	1	225	24.7	4.5
XP_025119864	ATP-dependent 6-phosphofructokinase, platelet type isoform X1	PFKP	0.67	16.535	6	3	11	3	1	791	85.9	6.96
XP_025119865	ATP-dependent 6-phosphofructokinase, platelet type isoform X2	PFKP.1	0.67	16.535	6	3	11	3	1	791	86	7.23
XP_025149250	glucosidase 2 subunit beta isoform X2	PRKCSH	0.67	8.793	5	3	7	3	1	533	60.1	4.45
XP_025149249	glucosidase 2 subunit beta isoform X1	PRKCSH.1	0.67	8.793	5	3	7	3	1	534	60.3	4.45
XP_006051354	peptidyl-prolyl cis-trans isomerase A isoform X1	PPIA	0.68	18.064	42	5	21	5	1	164	17.9	8.16
XP_025148402	matrin-3 isoform X1	MATR3	0.69	7.085	3	1	1	1	1	897	100	6.04
XP_025148406	matrin-3 isoform X3	MATR3.1	0.69	7.085	3	1	1	1	1	844	93.8	5.59
XP_025148405	matrin-3 isoform X2	MATR3.2	0.69	7.085	3	1	1	1	1	849	94.6	6.25
XP_025147127	peptidyl-prolyl cis-trans isomerase A isoform X2	PPIA.1	0.69	5.69	24	2	9	2	1	104	11.3	8.31
XP_006045174	tubulin beta-4A chain	TUBB4A	0.7	32.027	17	5	24	5	1	444	49.6	4.88
XP_006046659	keratin, type II cytoskeletal 1	KRT1	0.7	19.248	7	4	26	4	1	614	63.6	8.46
XP_025142112	sialate O-acetylesterase isoform X3	SIAE	0.7	12.526	6	2	13	2	1	487	54.5	7.11
XP_025142113	sialate O-acetylesterase isoform X4	SIAE.1	0.7	12.526	7	2	13	2	1	434	48.7	6.96
XP_025142111	sialate O-acetylesterase isoform X1	SIAE.2	0.7	12.526	6	2	13	2	1	486	54.4	7.11
XP_006057703	sialate O-acetylesterase isoform X2	SIAE.3	0.7	12.526	6	2	13	2	1	522	58.4	6.86
XP_025123038	glutathione hydrolase 1 proenzyme isoform X2	LOC102412993.1	0.7	4.096	5	1	4	1	1	225	23.8	5.34
XP_006050953	peroxiredoxin-5, mitochondrial isoform X1	PRDX5.1	0.72	75.038	36	9	230	9	1	219	23.3	8.07
XP_006047011	serum albumin	ALB	0.73	946.218	85	82	2072	82	1	607	69.2	6.25
XP_025126805	duodenase-1-like isoform X1	LOC112580797	0.73	3.892	6	1	1	1	1	251	27.6	8.25
XP_025126806	duodenase-1-like isoform X2	LOC112580797.1	0.73	3.892	6	1	1	1	1	245	27.2	8.06
XP_025126804	duodenase-1-like	LOC112580796	0.73	3.892	6	1	1	1	1	251	27.5	8.25
XP_025139473	protein TESPA1 isoform X6	TESPA1	0.73	1.462	1	1	8	1	1	552	62.2	6.32
XP_006060645	hyaluronidase PH-20 isoform X1	LOC102411950	0.74	9.173	5	3	4	3	1	552	62.1	8.41
XP_025147242	hyaluronidase PH-20 isoform X2	LOC102411950.1	0.74	9.173	5	3	4	3	1	522	59.1	8.54
XP_025140225	GLIPR1-like protein 1 isoform X2	GLIPR1L1	0.75	31.081	28	8	62	8	1	197	22.6	9.25
XP_006044440	GLIPR1-like protein 1 isoform X1	GLIPR1L1.1	0.75	31.081	23	8	62	8	1	241	27.2	8.66
XP_025149937	biotinidase isoform X1	BTD	0.75	15.349	8	4	11	4	1	534	59.1	6.29
XP_006048789	biotinidase isoform X2	BTD.1	0.75	15.349	8	4	11	4	1	525	58.1	6.29
XP_006067188	perilipin-3 isoform X1	PLIN3	0.75	6.94	7	1	2	1	1	438	47.6	6.13
XP_006067191	perilipin-3 isoform X2	PLIN3.1	0.75	6.94	7	1	2	1	1	437	47.4	6.13
XP_025149037	perilipin-3 isoform X4	PLIN3.2	0.75	6.94	8	1	2	1	1	396	42.7	5.99
XP_025149038	perilipin-3 isoform X5	PLIN3.3	0.75	6.94	8	1	2	1	1	395	42.6	5.99
XP_025149036	perilipin-3 isoform X3	PLIN3.4	0.75	6.94	7	1	2	1	1	407	44.4	6.87
XP_025123007	large proline-rich protein BAG6 isoform X6	BAG6	0.75	5.621	3	2	7	2	1	1110	116.8	5.66
XP_025123000	large proline-rich protein BAG6 isoform X5	BAG6.1	0.75	5.621	3	2	7	2	1	1115	117.1	5.67
XP_025122988	large proline-rich protein BAG6 isoform X3	BAG6.2	0.75	5.621	2	2	7	2	1	1138	120	5.59
XP_025122973	large proline-rich protein BAG6 isoform X1	BAG6.3	0.75	5.621	2	2	7	2	1	1164	122.3	5.59
XP_025123011	large proline-rich protein BAG6 isoform X7	BAG6.4	0.75	5.621	3	2	7	2	1	1102	116.3	5.55
XP_025123021	large proline-rich protein BAG6 isoform X9	BAG6.5	0.75	5.621	3	2	7	2	1	1079	113.5	5.63
XP_025123025	large proline-rich protein BAG6 isoform X10	BAG6.6	0.75	5.621	3	2	7	2	1	1035	109.7	5.38
XP_025122980	large proline-rich protein BAG6 isoform X2	BAG6.7	0.75	5.621	2	2	7	2	1	1146	120.4	5.69
XP_025122994	large proline-rich protein BAG6 isoform X4	BAG6.8	0.75	5.621	2	2	7	2	1	1128	118.7	5.55
XP_025123017	large proline-rich protein BAG6 isoform X8	BAG6.9	0.75	5.621	3	2	7	2	1	1097	115.2	5.78
XP_025134943	histone H2B type 1-N-like	LOC102400687	0.75	1.63	6	1	1	1	1	147	15.8	9.99
XP_006059757	histone H2B type 2-E-like	LOC102405405	0.75	1.63	7	1	1	1	1	126	14	10.23
XP_025144666	histone H2B type 2-E-like	LOC102415844	0.75	1.63	7	1	1	1	1	126	13.8	10.24
XP_025123273	histone H2B type 2-E-like	LOC112579914	0.75	1.63	7	1	1	1	1	126	13.9	10.17
XP_025122420	histone H2B type 1-A-like	LOC102394107	0.75	1.63	7	1	1	1	1	126	14	10.48
XP_006047698	cadherin-1	CDH1	0.76	22.436	6	5	57	5	1	883	98.1	4.88
XP_025136854	T-complex protein 1 subunit zeta-2 isoform X5	CCT6B	0.76	17.786	5	2	15	2	1	465	51.2	6.95
XP_006068697	keratin, type I cytoskeletal 25	KRT25	0.76	1.793	2	1	1	1	1	450	49.3	5.03
XP_006068699	LOW QUALITY PROTEIN: keratin, type I cytoskeletal 27	KRT27	0.76	1.793	2	1	1	1	1	514	56.1	5.14
XP_025137117	disintegrin and metalloproteinase domain-containing protein 20-like	LOC112583834	0.78	30.814	8	6	31	3	1	761	86.3	7.55
XP_025127765	semaphorin-3F isoform X2	SEMA3F	0.78	5.979	2	2	2	2	1	807	90.9	7.65
XP_025127766	semaphorin-3F isoform X3	SEMA3F.1	0.78	5.979	3	2	2	2	1	792	89	8.1
XP_025127767	semaphorin-3F isoform X4	SEMA3F.2	0.78	5.979	3	2	2	2	1	761	85.6	7.85
XP_025127764	semaphorin-3F isoform X1	SEMA3F.3	0.78	5.979	2	2	2	2	1	838	94.2	7.93
XP_006042264	vitronectin	VTN	0.78	4.252	3	1	2	1	1	476	53.8	6.29
XP_006062005	T-complex protein 1 subunit epsilon	CCT5	0.79	135.264	34	18	171	18	1	541	59.6	5.91
XP_006049642	beta-defensin 129	DEFB129	0.8	42.951	29	8	52	8	1	170	19.2	9.42
XP_006050391	protein CutA isoform X2	CUTA	0.8	36.006	34	4	54	4	1	177	18.9	7.97
XP_006050392	protein CutA isoform X1	CUTA.1	0.8	36.006	40	4	54	4	1	154	16.4	5.48
XP_025124482	carboxylesterase 5A isoform X4	CES5A	0.8	31.559	8	4	25	4	1	484	54.6	6.35
XP_006053716	carboxylesterase 5A isoform X1	CES5A.1	0.8	31.559	7	4	25	4	1	576	64.4	6.58
XP_006053717	carboxylesterase 5A isoform X3	CES5A.2	0.8	31.559	8	4	25	4	1	526	58.6	6.35
XP_025124481	carboxylesterase 5A isoform X2	CES5A.3	0.8	31.559	7	4	25	4	1	575	64.3	6.68
XP_025136852	T-complex protein 1 subunit zeta-2 isoform X3	CCT6B.1	0.8	20.789	8	3	29	3	1	473	51.4	7.46
XP_006071481	BH3-interacting domain death agonist isoform X2	BID	0.8	1.904	6	1	1	1	1	192	21.5	5.41
XP_006071479	BH3-interacting domain death agonist isoform X1	BID.1	0.8	1.904	6	1	1	1	1	193	21.6	5.41
NP_001306727	fructose-1,6-bisphosphatase 1	FBP1	0.81	120.538	50	15	114	15	1	338	36.7	7.68
XP_025138969	alpha-2-macroglobulin isoform X2	LOC102402539	0.82	152.144	19	19	165	19	1	1473	163.4	6.04
XP_006069848	alpha-2-macroglobulin isoform X1	LOC102402539.1	0.82	152.144	19	19	165	19	1	1474	163.6	5.99
XP_025149973	sperm-associated acrosin inhibitor-like isoform X1	LOC112587117	0.82	24.713	28	5	41	5	1	87	10.1	8.4
XP_025149975	sperm-associated acrosin inhibitor-like isoform X2	LOC112587117.1	0.82	24.713	28	5	41	5	1	86	10	8.6
XP_006056409	T-complex protein 1 subunit theta isoform X1	CCT8	0.83	132.735	44	20	142	20	1	553	60.2	5.74
XP_006056410	T-complex protein 1 subunit theta isoform X2	CCT8.1	0.83	132.735	44	20	142	20	1	548	59.6	5.59
XP_025130733	zinc-alpha-2-glycoprotein isoform X2	AZGP1	0.84	176.434	43	16	294	16	1	275	30.9	6.7
XP_006074296	phosphatidylethanolamine-binding protein 1	PEBP1	0.84	61.377	52	8	49	8	1	187	21	7.49
XP_025138143	gelsolin isoform X1	GSN	0.85	293.796	37	37	319	37	1	780	85.5	6.32
XP_025138145	gelsolin isoform X3	GSN.1	0.85	293.796	40	37	319	37	1	731	80.7	5.77
XP_025138144	gelsolin isoform X2	GSN.2	0.85	293.796	39	37	319	37	1	742	81.9	5.78
XP_006065240	serine protease inhibitor Kazal-type 8	SPINK8	0.85	27.628	33	4	52	4	1	96	10.8	6.73
XP_025150371	sperm acrosome membrane-associated protein 1	SPACA1	0.85	7.877	10	2	6	2	1	299	33.1	4.61
XP_006042163	sphingomyelin phosphodiesterase	SMPD1	0.85	3.205	5	2	3	2	1	627	69.6	6.86
XP_006075671	malate dehydrogenase, cytoplasmic	MDH1	0.86	23.705	19	6	29	6	1	334	36.4	6.58
XP_006079842	14-3-3 protein epsilon isoform X2	YWHAE	0.86	5.906	8	2	25	1	1	240	27.4	4.89
XP_006079841	14-3-3 protein epsilon isoform X1	YWHAE.1	0.86	5.906	8	2	25	1	1	255	29.2	4.74
XP_006053677	zinc-alpha-2-glycoprotein isoform X1	AZGP1.1	0.87	192.716	51	20	383	20	1	299	34	5.53
XP_006077003	protein FAM3B isoform X1	FAM3B	0.87	81.602	57	16	124	16	1	235	25.9	8.82
XP_006077004	protein FAM3B isoform X2	FAM3B.1	0.87	73.39	49	15	122	15	1	234	25.9	8.82
XP_025143815	lymphocyte function-associated antigen 3 isoform X1	CD58	0.87	10.122	12	2	3	2	1	245	27.3	5.62
XP_025143816	lymphocyte function-associated antigen 3 isoform X2	CD58.1	0.87	10.122	13	2	3	2	1	224	24.9	5.12
XP_006041938	complement factor B	CFB	0.88	22.032	9	5	17	5	1	761	85.4	7.68
XP_006080628	histone H3.3-like	LOC102399019	0.88	3.965	12	2	5	0	4	136	15.2	11.14
XP_006054995	histone H3.3-like	LOC102396450	0.88	3.965	12	2	5	0	4	136	15.2	10.84
XP_006048561	thiosulfate:glutathione sulfurtransferase isoform X1	TSTD1	0.89	9.136	23	1	3	1	1	141	15.4	9.85
XP_006048562	thiosulfate:glutathione sulfurtransferase isoform X2	TSTD1.1	0.89	9.136	24	1	3	1	1	136	15.1	9.11
XP_006065134	heat shock 70 kDa protein 4	HSPA4	0.89	7.968	5	3	3	3	1	840	94.4	5.21
XP_025128773	ERC protein 2 isoform X2	ERC2	0.89	1.996	1	1	1	1	1	1049	121.2	7.9
XP_025128776	ERC protein 2 isoform X5	ERC2.1	0.89	1.996	1	1	1	1	1	1006	116.4	7.71
XP_025138744	ELKS/Rab6-interacting/CAST family member 1 isoform X6	ERC1	0.89	1.996	1	1	1	1	1	1075	123.1	6.37
XP_025128775	ERC protein 2 isoform X4	ERC2.2	0.89	1.996	1	1	1	1	1	1028	119	7.61
XP_025138747	ELKS/Rab6-interacting/CAST family member 1 isoform X9	ERC1.1	0.89	1.996	1	1	1	1	1	976	111.6	6.47
XP_025138742	ELKS/Rab6-interacting/CAST family member 1 isoform X4	ERC1.2	0.89	1.996	1	1	1	1	1	1088	124.7	6.06
XP_025138748	ELKS/Rab6-interacting/CAST family member 1 isoform X10	ERC1.3	0.89	1.996	1	1	1	1	1	948	108.5	6.58
XP_025138746	ELKS/Rab6-interacting/CAST family member 1 isoform X8	ERC1.4	0.89	1.996	1	1	1	1	1	992	113.6	6.3
XP_025138745	ELKS/Rab6-interacting/CAST family member 1 isoform X7	ERC1.5	0.89	1.996	1	1	1	1	1	1020	116.7	6.2
XP_025138736	ELKS/Rab6-interacting/CAST family member 1 isoform X1	ERC1.6	0.89	1.996	1	1	1	1	1	1120	128.2	5.99
XP_025138741	ELKS/Rab6-interacting/CAST family member 1 isoform X3	ERC1.7	0.89	1.996	1	1	1	1	1	1092	125.1	6.06
XP_025128778	ERC protein 2 isoform X7	ERC2.3	0.89	1.996	1	1	1	1	1	990	114.5	7.83
XP_025128772	ERC protein 2 isoform X1	ERC2.4	0.89	1.996	1	1	1	1	1	1057	122.2	8.1
XP_025138743	ELKS/Rab6-interacting/CAST family member 1 isoform X5	ERC1.8	0.89	1.996	1	1	1	1	1	1076	123.1	6.2
XP_025128774	ERC protein 2 isoform X3	ERC2.5	0.89	1.996	1	1	1	1	1	1033	119.3	8
XP_025138740	ELKS/Rab6-interacting/CAST family member 1 isoform X2	ERC1.9	0.89	1.996	1	1	1	1	1	1116	127.8	5.99
XP_025128777	ERC protein 2 isoform X6	ERC2.6	0.89	1.996	1	1	1	1	1	994	114.9	7.83
XP_006048652	sulfhydryl oxidase 1 isoform X2	QSOX1.1	0.9	81.553	19	14	106	14	1	704	77.3	9.41
XP_006058682	alpha-2-HS-glycoprotein	AHSG	0.91	47.465	32	7	26	7	1	359	38.2	5.49
XP_025147958	peptidyl-glycine alpha-amidating monooxygenase isoform X2	PAM.2	0.91	10.887	4	5	17	5	1	972	108	6.68
XP_025147962	peptidyl-glycine alpha-amidating monooxygenase isoform X6	PAM.3	0.91	10.887	5	5	17	5	1	886	98.6	6.43
XP_025147960	peptidyl-glycine alpha-amidating monooxygenase isoform X4	PAM.4	0.91	10.887	5	5	17	5	1	905	100.7	6.54
XP_025147959	peptidyl-glycine alpha-amidating monooxygenase isoform X3	PAM.5	0.91	10.887	5	5	17	5	1	954	106	6.58
XP_006056471	peptidyl-glycine alpha-amidating monooxygenase isoform X1	PAM.6	0.91	10.887	4	5	17	5	1	973	108.1	6.68
XP_025147961	peptidyl-glycine alpha-amidating monooxygenase isoform X5	PAM.7	0.91	10.887	5	5	17	5	1	904	100.6	6.54
XP_006043251	secretoglobin family 1D member isoform X1	LOC102395773.1	0.92	258.982	68	20	2223	20	1	102	11.4	8.72
XP_025133608	four and a half LIM domains protein 1, partial	LOC102406359	0.92	19.851	13	3	16	3	1	424	47.3	8.88
XP_025133632	four and a half LIM domains protein 1, partial	LOC102395439	0.92	19.851	15	3	16	3	1	368	41.3	8.88
XP_006041251	nucleobindin-2	NUCB2	0.93	217.314	62	23	194	22	1	415	49.2	5.21
XP_006052043	T-complex protein 1 subunit gamma	CCT3	0.95	198.388	52	30	262	30	1	545	60.5	6.8
XP_006079820	pigment epithelium-derived factor	SERPINF1	0.96	11.077	9	1	2	1	1	416	46.2	7.47
XP_025150581	histidine triad nucleotide-binding protein 3 isoform X3	HINT3.2	0.96	3.772	6	1	2	1	1	156	17.9	8.15
XP_006062991	mitogen-activated protein kinase kinase kinase 19 isoform X2	MAP3K19	0.96	1.336	1	1	3	1	1	1380	155.8	6.86
XP_006062989	mitogen-activated protein kinase kinase kinase 19 isoform X1	MAP3K19.1	0.96	1.336	1	1	3	1	1	1530	172.4	6.35
XP_006043253	isoaspartyl peptidase/L-asparaginase	ASRGL1	0.97	122.504	46	15	199	15	1	308	32	7.4
XP_006053336	acylamino-acid-releasing enzyme isoform X1	APEH	0.97	18.119	7	3	8	3	1	730	81	5.33
XP_025128673	acylamino-acid-releasing enzyme isoform X2	APEH.1	0.97	18.119	7	3	8	3	1	650	71.8	5.08
XP_025137840	cathepsin L2	CTSV	0.97	5.387	4	1	3	1	1	334	37.3	7.18
XP_025141621	espin	ESPN	0.97	2.796	2	1	1	1	1	852	91.6	7.52
XP_025150311	ectonucleotide pyrophosphatase/phosphodiesterase family member 3 isoform X1	ENPP3	0.99	71.487	20	14	73	14	1	874	99.5	6.01
XP_025150312	ectonucleotide pyrophosphatase/phosphodiesterase family member 3 isoform X2	ENPP3.1	0.99	65.712	22	13	72	13	1	709	81.1	6.14
XP_006049575	cullin-3 isoform X5	CUL3	0.99	47.239	8	7	38	7	1	702	81.1	8.51
XP_006049573	cullin-3 isoform X2	CUL3.1	0.99	47.239	7	7	38	7	1	768	88.9	8.48
XP_025141472	LOW QUALITY PROTEIN: agrin	AGRN	1	61.919	10	11	26	11	1	2066	218.7	6.18
XP_006058022	inositol-3-phosphate synthase 1	ISYNA1	1	27.84	12	5	19	5	1	557	60.7	6
XP_025126388	LOW QUALITY PROTEIN: slit homolog 3 protein	SLIT3	1	7.399	1	2	2	2	1	1523	167.3	7.77
XP_006068003	LOW QUALITY PROTEIN: dynactin subunit 1	DCTN1	1	3.855	2	2	4	2	1	1281	141.7	5.86
XP_006062617	tubulin beta-4B chain	TUBB4B	1.01	57.97	25	8	61	8	1	445	49.8	4.89
XP_025130778	glycerol-3-phosphate phosphatase	PGP	1.01	22.983	24	7	23	7	1	321	34.3	5.34
XP_025152105	histone H2A type 1-D-like	LOC102389822	1.01	12.71	23	2	24	1	1	121	13.1	11.02
XP_006048086	histone H2A type 1-B/E	LOC102389168	1.01	12.71	22	2	24	1	1	130	14.1	11.05
XP_006063276	histone H2A type 3	LOC102404666	1.01	12.71	20	2	24	1	1	140	15.3	10.56
XP_006048081	histone H2A type 1-C	LOC102414630	1.01	12.71	22	2	24	1	1	130	14.1	11.05
XP_025118018	lipocalin-1 isoform X2	LCN1	1.02	98.553	76	11	200	2	1	173	19.1	4.7
XP_006078164	LOW QUALITY PROTEIN: sperm-associated antigen 11-like	LOC102415447	1.02	35.447	46	5	66	5	1	80	9.3	8.21
XP_006080459	CUB and zona pellucida-like domain-containing protein 1	CUZD1	1.02	7.946	20	2	11	2	1	124	13.8	6.27
XP_025117954	Sjoegren syndrome nuclear autoantigen 1 isoform X2	SSNA1	1.02	6.645	18	2	5	2	1	119	13.6	5.68
XP_025117953	Sjoegren syndrome nuclear autoantigen 1 isoform X1	SSNA1.1	1.02	6.645	16	2	5	2	1	132	14.8	7.96
XP_006042699	protein disulfide-isomerase A3	PDIA3	1.03	35.042	18	7	20	7	1	505	56.9	6.81
XP_006072250	peroxiredoxin-4 isoform X1	PRDX4	1.04	14.634	19	4	7	4	1	275	30.8	6.44
XP_025131824	peroxiredoxin-4 isoform X2	PRDX4.1	1.04	14.634	19	4	7	4	1	275	31	6.04
XP_025135503	THO complex subunit 4	ALYREF	1.04	5.948	11	1	1	1	1	257	26.9	11.15
XP_025136855	T-complex protein 1 subunit zeta-2 isoform X6	CCT6B.2	1.06	6.963	4	2	17	2	1	428	46.7	8.18
XP_006047326	cysteine dioxygenase type 1 isoform X1	CDO1	1.06	2.28	4	1	24	1	1	200	23	6.74
XP_025127318	proteasome subunit alpha type-6 isoform X2	PSMA6.1	1.07	33.372	31	5	49	5	1	227	25.2	6.55
XP_006042213	ferritin heavy chain	LOC102390560	1.07	5.605	19	2	4	2	1	181	21	5.87
NP_001277817	uncharacterized protein LOC102414936 precursor	LOC102414936	1.08	29.8	46	4	27	4	1	147	16.3	7.2
XP_006062595	prostaglandin-H2 D-isomerase	PTGDS	1.08	25.193	19	7	34	7	1	191	21.2	7.3
XP_006064386	transitional endoplasmic reticulum ATPase	VCP	1.11	151.545	39	23	143	23	1	806	89.2	5.26
XP_025128137	dystroglycan	DAG1	1.11	17.096	7	4	20	4	1	895	97.2	8.76
XP_006063995	cytosol aminopeptidase	LAP3	1.11	10.047	7	2	2	2	1	519	56.3	6.64
XP_006067605	nectin-2 isoform X1	NECTIN2	1.11	8.066	6	2	7	2	1	539	58.1	5.12
XP_006067607	nectin-2 isoform X2	NECTIN2.1	1.11	8.066	7	2	7	2	1	480	51.3	5.68
XP_006074537	adenylate kinase isoenzyme 1 isoform X2	AK1	1.12	93.553	71	13	122	13	1	194	21.7	7.91
XP_006074532	adenylate kinase isoenzyme 1 isoform X1	AK1.1	1.12	93.553	65	13	122	13	1	211	23.4	8.1
XP_006042389	aldose reductase	AKR1B1	1.12	53.759	40	10	44	10	1	316	35.9	6.39
XP_006053742	72 kDa type IV collagenase	MMP2	1.14	40.222	11	6	19	6	1	661	73.9	5.59
XP_025145745	alpha-S1-casein isoform X3	CSN1S1	1.14	2.544	6	1	1	1	1	214	24.4	4.89
XP_025145744	alpha-S1-casein isoform X1	CSN1S1.1	1.14	2.544	6	1	1	1	1	215	24.5	4.89
XP_006071187	alpha-S1-casein isoform X2	CSN1S1.2	1.14	2.544	6	1	1	1	1	214	24.3	4.89
XP_006071188	alpha-S1-casein isoform X7	CSN1S1.3	1.14	2.544	6	1	1	1	1	206	23.4	4.94
XP_025145746	alpha-S1-casein isoform X4	CSN1S1.4	1.14	2.544	6	1	1	1	1	207	23.5	4.96
XP_025145747	alpha-S1-casein isoform X5	CSN1S1.5	1.14	2.544	6	1	1	1	1	207	23.6	4.94
XP_025145753	alpha-S1-casein isoform X12	CSN1S1.6	1.14	2.544	7	1	1	1	1	178	20.3	5.16
XP_025145748	alpha-S1-casein isoform X6	CSN1S1.7	1.14	2.544	6	1	1	1	1	207	23.7	5.12
XP_025145749	alpha-S1-casein isoform X8	CSN1S1.8	1.14	2.544	6	1	1	1	1	206	23.6	5.12
XP_006073109	carbohydrate sulfotransferase 14	CHST14	1.14	1.67	2	1	1	1	1	376	43.2	9.35
XP_006061078	C-reactive protein	CRP	1.15	1.894	4	1	5	1	1	224	25.3	7.21
XP_025130314	LOW QUALITY PROTEIN: vacuolar fusion protein CCZ1 homolog	CCZ1	1.16	2.203	3	1	5	1	1	480	55.4	6.05
XP_025133961	A disintegrin and metallopeptidase domain 3 isoform X1	LOC102405271	1.17	13.973	3	2	14	2	1	766	85.7	7.43
XP_006078702	A disintegrin and metallopeptidase domain 3 isoform X2	LOC102405271.1	1.17	13.973	3	2	14	2	1	751	84	7.27
XP_025133977	A disintegrin and metallopeptidase domain 3 isoform X4	LOC102405271.2	1.17	13.973	3	2	14	2	1	736	82.8	7.31
XP_025133968	A disintegrin and metallopeptidase domain 3 isoform X3	LOC102405271.3	1.17	13.973	3	2	14	2	1	736	82.5	7.34
XP_006049327	endoplasmic reticulum chaperone BiP	HSPA5	1.18	149.118	40	25	117	23	1	655	72.4	5.16
XP_025129710	spermadhesin Z13	LOC112581540	1.19	392.738	55	16	3431	12	1	134	15.3	6.06
XP_025146595	zona pellucida-binding protein 1 isoform X5	ZPBP.2	1.19	92.624	23	12	127	12	1	325	36.9	8.95
XP_025146594	zona pellucida-binding protein 1 isoform X4	ZPBP.3	1.19	92.624	23	12	127	12	1	330	37.5	7.78
XP_025146596	zona pellucida-binding protein 1 isoform X6	ZPBP.4	1.19	92.624	23	12	127	12	1	322	36.5	8.97
XP_025146592	zona pellucida-binding protein 1 isoform X2	ZPBP.5	1.19	92.624	21	12	127	12	1	353	40.2	8.78
XP_025146591	zona pellucida-binding protein 1 isoform X1	ZPBP.6	1.19	92.624	21	12	127	12	1	357	40.2	8.32
XP_025146593	zona pellucida-binding protein 1 isoform X3	ZPBP.7	1.19	92.624	21	12	127	12	1	350	39.4	8.72
XP_006066928	epididymal secretory glutathione peroxidase	LOC102415716	1.19	32.798	25	7	51	5	1	219	25	7.42
XP_025139731	lysozyme C, tracheal isozyme	LOC112584572	1.2	1.688	4	1	2	0	2	166	17.8	9.26
XP_006074829	phosphoglycerate mutase 2	PGAM2	1.21	245.692	65	23	552	16	1	253	28.7	8.72
XP_025120842	carboxypeptidase Q isoform X1	CPQ	1.21	49.513	17	6	31	6	1	498	54.5	6.09
XP_025120843	carboxypeptidase Q isoform X2	CPQ.1	1.21	49.513	18	6	31	6	1	483	52.8	6.09
XP_006070409	T-complex protein 1 subunit zeta	CCT6A	1.21	47.443	14	6	50	6	1	531	57.9	6.76
XP_006059043	tubulin alpha-4A chain	TUBA4A	1.21	14.561	9	2	9	2	1	448	49.9	5.06
XP_006068865	tubulin alpha-1A chain-like	LOC102415619	1.21	14.561	9	2	9	2	1	451	50.2	5.11
XP_025122633	apolipoprotein A-IV	APOA4	1.21	13.386	16	4	8	4	1	380	43	5.4
XP_025150569	cAMP-dependent protein kinase inhibitor beta isoform X2	PKIB	1.22	5.313	20	1	1	1	1	79	8.5	5.05
XP_025150568	cAMP-dependent protein kinase inhibitor beta isoform X1	PKIB.1	1.22	5.313	17	1	1	1	1	93	10.1	4.68
XP_025134980	phosphatidylethanolamine-binding protein 4 isoform X2	PEBP4	1.23	28.428	25	4	31	4	1	189	21.2	6.54
XP_006052462	seminal plasma protein BSP-30 kDa	LOC102403094	1.24	157.999	43	17	185	17	1	183	21.3	6.32
XP_006060126	beta-enolase isoform X1	ENO3	1.24	12.505	7	2	4	2	1	440	47.7	8.34
XP_006060127	beta-enolase isoform X2	ENO3.1	1.24	12.505	7	2	4	2	1	434	47	7.97
XP_006067490	epididymal sperm-binding protein 1	ELSPBP1	1.25	129.22	62	17	449	17	1	223	26	7.8
XP_006061971	cAMP-dependent protein kinase type I-alpha regulatory subunit	PRKAR1A	1.25	41.49	19	6	120	6	1	380	42.9	5.35
XP_006062553	histo-blood group ABO system transferase isoform X5	ABO	1.25	3.064	2	1	1	1	1	379	43.8	7.37
XP_006062551	histo-blood group ABO system transferase isoform X3	ABO.1	1.25	3.064	2	1	1	1	1	380	44.1	7.2
XP_006062549	histo-blood group ABO system transferase isoform X1	ABO.2	1.25	3.064	2	1	1	1	1	396	45.7	7.37
XP_006062552	histo-blood group ABO system transferase isoform X4	ABO.3	1.25	3.064	2	1	1	1	1	380	43.8	7.37
XP_025118199	histo-blood group ABO system transferase isoform X6	ABO.4	1.25	3.064	2	1	1	1	1	364	42.2	7.2
XP_025118200	histo-blood group ABO system transferase isoform X7	ABO.5	1.25	3.064	2	1	1	1	1	363	42.2	7.2
XP_025118201	histo-blood group ABO system transferase isoform X8	ABO.6	1.25	3.064	3	1	1	1	1	313	36.4	7.9
XP_006062550	histo-blood group ABO system transferase isoform X2	ABO.7	1.25	3.064	2	1	1	1	1	395	45.6	7.37
NP_001277908	haptoglobin precursor	HP	1.27	8.354	6	2	6	2	1	401	44.9	7.56
XP_006066107	histone H2A.Z	LOC102400686	1.27	3.669	7	1	17	0	2	128	13.4	10.45
XP_006049267	histone H2A type 2-B	LOC102415072	1.27	3.669	7	1	17	0	2	130	14	10.89
XP_006078744	histone H2AX	LOC102392520	1.27	3.669	6	1	17	0	2	143	15.1	10.74
XP_006070398	beta-glucuronidase	LOC102410676	1.27	2.039	1	1	4	1	1	652	74.3	6.3
XP_025127220	serpin A3-7-like	LOC102409634	1.28	8.011	7	2	2	1	1	417	47	6.37
XP_006065206	cAMP-dependent protein kinase type II-alpha regulatory subunit	PRKAR2A	1.31	62.874	38	11	38	11	1	401	45.1	4.93
XP_006044080	pro-cathepsin H isoform X2	CTSH	1.32	13.843	11	3	12	3	1	335	37.5	8.12
XP_025127173	pro-cathepsin H isoform X1	CTSH.1	1.32	13.843	9	3	12	3	1	410	44.8	8.65
XP_006046823	syntaxin-binding protein 2	STXBP2	1.34	9.813	5	2	10	2	1	593	66.3	6.87
XP_006042181	tripeptidyl-peptidase 1	TPP1	1.37	4.486	2	1	3	1	1	572	62.4	7.12
XP_025124995	carcinoembryonic antigen-related cell adhesion molecule 21-like	LOC102411025	1.37	1.841	3	1	1	1	1	271	29.7	9.32
XP_006064329	lysozyme C-2	LOC102415587	1.39	23.098	34	2	17	2	1	147	16.3	6.51
NP_001277870	lysozyme C-1-like precursor	LOC102415277	1.39	23.098	34	2	17	2	1	147	16.3	7.2
XP_006049392	HD domain-containing protein 2	HDDC2	1.39	3.454	7	1	2	1	1	205	23.3	5.16
XP_006071570	rho-related GTP-binding protein RhoC	RHOC	1.41	6.432	12	2	15	2	1	193	22	6.58
XP_006057043	3-mercaptopyruvate sulfurtransferase isoform X1	MPST	1.41	3.266	10	1	1	1	1	332	36.8	7.24
XP_006057044	3-mercaptopyruvate sulfurtransferase isoform X2	MPST.1	1.41	3.266	10	1	1	1	1	330	36.5	6.3
XP_006057045	3-mercaptopyruvate sulfurtransferase isoform X3	MPST.2	1.41	3.266	11	1	1	1	1	297	33.2	6.29
XP_006052236	proteasome subunit alpha type-5	PSMA5	1.43	27.826	19	4	30	4	1	241	26.4	4.79
XP_025134979	phosphatidylethanolamine-binding protein 4 isoform X1	PEBP4.1	1.44	35.021	27	5	40	5	1	222	25	7.01
XP_006051590	phosphoglycerate kinase 1	PGK1	1.45	79.36	20	10	125	1	1	417	44.5	8.27
XP_025124131	seminal plasma protein PDC-109	LOC102403740	1.45	16.703	17	3	18	3	1	138	16.1	6.11
XP_006043685	rab GDP dissociation inhibitor alpha	GDI1	1.45	10.91	3	1	5	1	1	447	50.5	5.14
XP_006064972	alpha-centractin	ACTR1A	1.45	4.082	3	1	7	1	1	376	42.6	6.64
XP_006059944	beta-centractin isoform X1	ACTR1B	1.45	4.082	3	1	7	1	1	376	42.3	6.55
XP_025116446	beta-centractin isoform X2	ACTR1B.1	1.45	4.082	3	1	7	1	1	362	40.6	6.54
XP_025127227	serpin A3-1 isoform X1	LOC102414740	1.45	3.806	4	2	12	2	1	471	53	6.54
XP_025127225	serpin A3-3-like	LOC102405963	1.45	3.806	4	2	12	2	1	411	46.3	8.94
XP_025127228	serpin A3-1 isoform X2	LOC102414740.1	1.45	3.806	4	2	12	2	1	412	46.6	6.27
XP_025131392	serine/threonine-protein phosphatase CPPED1 isoform X3	CPPED1	1.47	7.762	10	1	3	1	1	172	19.1	5.58
XP_006073701	serine/threonine-protein phosphatase CPPED1 isoform X2	CPPED1.1	1.47	7.762	5	1	3	1	1	313	35.4	5.55
XP_025131391	serine/threonine-protein phosphatase CPPED1 isoform X1	CPPED1.2	1.47	7.762	5	1	3	1	1	351	39.3	6.39
XP_025145699	alpha-fetoprotein	AFP	1.48	2.072	1	1	25	1	1	610	68.5	6.29
XP_025138353	acrosin isoform X2	ACR	1.49	45.474	23	8	60	8	1	377	41.5	9.44
XP_025138352	acrosin isoform X1	ACR.1	1.49	45.474	21	8	60	8	1	414	45.4	9.45
XP_006045442	T-complex protein 1 subunit zeta-2 isoform X2	CCT6B.3	1.49	33.308	11	4	38	4	1	494	53.8	7.49
XP_006045441	T-complex protein 1 subunit zeta-2 isoform X1	CCT6B.4	1.49	33.308	10	4	38	4	1	531	58	7.69
XP_025137757	amyloid-beta A4 protein isoform X4	APP	1.5	24.372	7	5	18	4	1	733	82.9	4.81
XP_025137742	amyloid-beta A4 protein isoform X1	APP.1	1.5	24.372	7	5	18	4	1	770	86.9	4.84
XP_025137753	amyloid-beta A4 protein isoform X3	APP.2	1.5	24.372	7	5	18	4	1	751	84.8	4.82
XP_025137746	amyloid-beta A4 protein isoform X2	APP.3	1.5	24.372	7	5	18	4	1	752	85	4.83
XP_006068840	amyloid-like protein 1 isoform X2	APLP1	1.5	1.387	1	1	1	1	1	645	71.7	5.74
XP_006068839	amyloid-like protein 1 isoform X1	APLP1.1	1.5	1.387	1	1	1	1	1	646	71.8	5.74
XP_025120772	carbonic anhydrase 2	CA2	1.52	14.439	12	3	8	3	1	260	29.1	6.76
XP_025137941	cylicin-2 isoform X2	CYLC2	1.52	9.914	7	2	10	2	1	374	41.6	9.76
XP_006046502	cylicin-2 isoform X1	CYLC2.1	1.52	9.914	6	2	10	2	1	458	50.4	9.73
XP_006053007	malectin isoform X1	MLEC	1.54	3.018	4	1	1	1	1	282	31.4	5.54
XP_006063186	ceruloplasmin isoform X1	CP	1.55	15.162	2	2	6	2	1	1090	124.2	6.19
XP_025145887	ceruloplasmin isoform X3	CP.1	1.55	15.162	3	2	6	2	1	1059	120.5	6.13
XP_025145881	ceruloplasmin isoform X2	CP.2	1.55	15.162	3	2	6	2	1	1061	120.6	6.13
XP_006055022	prominin-1 isoform X3	PROM1	1.55	7.719	3	2	3	2	1	829	94	6.23
XP_025145446	prominin-1 isoform X1	PROM1.1	1.55	7.719	3	2	3	2	1	864	98	6.95
XP_025145453	prominin-1 isoform X2	PROM1.2	1.55	7.719	3	2	3	2	1	849	96.2	6.79
XP_025145454	prominin-1 isoform X4	PROM1.3	1.55	7.719	3	2	3	2	1	814	92	7.34
XP_025145455	prominin-1 isoform X5	PROM1.4	1.55	7.719	3	2	3	2	1	751	85.3	7.78
XP_006048177	macrophage migration inhibitory factor	MIF	1.59	4.868	11	1	2	1	1	115	12.3	7.81
XP_025135723	spermatogenesis-associated protein 32 isoform X1	SPATA32	1.59	2.382	3	1	2	1	1	449	49.1	5.88
XP_025135724	spermatogenesis-associated protein 32 isoform X2	SPATA32.1	1.59	2.382	3	1	2	1	1	365	40.4	5.22
XP_006056514	cofilin-1	CFL1	1.6	12.997	30	4	9	4	1	166	18.5	8
XP_025126803	duodenase-1	LOC102399824	1.62	7.312	6	1	7	1	1	252	27.7	9.72
XP_006056896	glutaminyl-peptide cyclotransferase	QPCT	1.62	3.803	2	1	2	1	1	361	41.2	6.52
XP_025151301	sorbitol dehydrogenase isoform X2	SORD	1.63	161.842	47	16	181	16	1	315	33.3	7.05
XP_025118123	UTP--glucose-1-phosphate uridylyltransferase isoform X1	UGP2	1.63	68.854	19	10	56	10	1	514	57.4	7.88
XP_006064851	UTP--glucose-1-phosphate uridylyltransferase isoform X2	UGP2.1	1.63	68.854	20	10	56	10	1	508	56.9	7.88
XP_006064853	UTP--glucose-1-phosphate uridylyltransferase isoform X3	UGP2.2	1.63	68.854	20	10	56	10	1	497	55.6	7.61
XP_006044999	peptidyl-prolyl cis-trans isomerase B	PPIB	1.63	8.303	10	2	11	2	1	216	23.7	9.32
XP_006056125	L-lactate dehydrogenase C chain isoform X1	LOC102412587	1.64	15.307	8	4	18	4	1	332	35.9	7.71
XP_025134981	phosphatidylethanolamine-binding protein 4 isoform X3	PEBP4.2	1.65	27.819	24	4	25	4	1	184	20.7	5.94
XP_025134803	uncharacterized protein LOC112583463	LOC112583463	1.66	15.931	10	3	48	3	1	220	23.6	10.11
XP_025148788	LOW QUALITY PROTEIN: zinc finger protein 474	LOC102399131	1.67	15.236	11	5	13	5	1	454	51	9.47
XP_006071556	F-actin-capping protein subunit alpha-1	CAPZA1	1.69	3.77	6	1	2	1	1	286	32.9	5.82
XP_025136853	T-complex protein 1 subunit zeta-2 isoform X4	CCT6B.5	1.72	28.041	9	3	32	3	1	471	51.5	7.72
XP_006076365	sorbitol dehydrogenase isoform X1	SORD.1	1.75	210.284	58	22	249	22	1	356	38.1	7.46
XP_025151461	retinal dehydrogenase 2	ALDH1A2	1.75	5.499	3	1	4	1	1	552	60.6	6.25
XP_025124987	ly6/PLAUR domain-containing protein 4 isoform X3	LYPD4	1.76	7.226	7	1	1	1	1	215	23.4	8.78
XP_025124988	ly6/PLAUR domain-containing protein 4 isoform X4	LYPD4.1	1.76	7.226	8	1	1	1	1	198	21.4	9.17
XP_025124989	ly6/PLAUR domain-containing protein 4 isoform X5	LYPD4.2	1.76	7.226	8	1	1	1	1	194	20.9	8.7
XP_025124986	ly6/PLAUR domain-containing protein 4 isoform X1	LYPD4.3	1.76	7.226	6	1	1	1	1	263	28.9	8.44
XP_006039933	ly6/PLAUR domain-containing protein 4 isoform X2	LYPD4.4	1.76	7.226	6	1	1	1	1	246	26.8	8.68
XP_025149457	cAMP-dependent protein kinase catalytic subunit alpha isoform X1	PRKACA	1.79	24.439	8	3	29	3	1	351	40.6	8.65
XP_006066594	cAMP-dependent protein kinase catalytic subunit alpha isoform X2	PRKACA.1	1.79	24.439	8	3	29	3	1	343	39.9	8.48
XP_006041443	deoxyribonuclease gamma	DNASE1L3	1.81	159.956	43	19	142	19	1	305	34.9	9.25
XP_006067357	NEDD8-conjugating enzyme Ubc12 isoform X1	UBE2M.1	1.82	5.78	13	2	8	2	1	183	20.9	7.69
XP_025148257	seminal plasma acrosin inhibitor A1-like isoform X2	LOC102403067	1.83	16.456	31	2	6	2	1	105	12.2	8.63
XP_025148262	sperm-associated acrosin inhibitor-like isoform X5	LOC102403067.1	1.83	16.456	37	2	6	2	1	89	10.2	8.31
XP_025148256	seminal plasma acrosin inhibitor A1-like isoform X1	LOC102403067.2	1.83	16.456	31	2	6	2	1	107	12.4	7.88
XP_006046703	prefoldin subunit 5	PFDN5	1.83	2.012	5	1	1	1	1	154	17.4	6.8
XP_006066713	V-type proton ATPase subunit B, kidney isoform	ATP6V1B1	1.84	20.475	6	2	6	2	1	513	56.6	5.41
XP_006063055	prosaposin isoform X1	PSAP	1.84	14.768	9	3	12	3	1	528	58.5	5.11
XP_006063056	prosaposin isoform X2	PSAP.1	1.84	14.768	9	3	12	3	1	527	58.3	5.11
XP_006060963	ephrin-A1	EFNA1	1.87	40.351	25	6	50	6	1	205	23.9	7.18
XP_006077194	protein phosphatase 1 regulatory subunit 7 isoform X1	PPP1R7	1.87	4.779	3	2	4	2	1	360	41.3	4.92
XP_025145101	protein phosphatase 1 regulatory subunit 7 isoform X2	PPP1R7.1	1.87	4.779	4	2	4	2	1	322	37.2	5.05
XP_006048453	inactive ribonuclease-like protein 9	LOC102391495	1.89	29.231	11	2	8	2	1	208	24.3	6.33
XP_006061228	phosphoglycerate mutase 1	PGAM1	1.9	77.991	30	9	107	2	1	254	28.8	7.18
NP_001277789	lactotransferrin precursor	LTF	1.91	462.744	52	51	683	50	1	708	77.6	7.99
XP_025133986	A disintegrin and metallopeptidase domain 3 isoform X5	LOC102405271.4	1.91	12.545	2	1	13	1	1	643	71.9	7.36
XP_025137597	LOW QUALITY PROTEIN: putative serine protease 47	LOC102400925	1.92	2.702	2	1	1	1	1	389	42.3	7.64
XP_006074439	V-type proton ATPase subunit F	ATP6V1F	1.92	2.23	8	1	1	1	1	119	13.4	5.82
XP_006060738	beta-defensin 123	DEFB123	1.93	19.661	24	3	10	3	1	67	7.8	9.83
XP_006043343	NEDD8	NEDD8	1.94	8.444	23	1	3	1	1	81	9.1	8.43
XP_025125262	ferritin light chain	FTL	1.95	12.633	18	2	7	2	1	175	20	6.3
NP_001277777	lysozyme-like protein 4 precursor	LYZL4	1.95	8.421	14	1	1	1	1	145	16.3	8.12
XP_006055155	26S proteasome non-ATPase regulatory subunit 4 isoform X2	PSMD4	1.95	8.248	6	2	10	2	1	377	40.7	4.79
XP_006055154	26S proteasome non-ATPase regulatory subunit 4 isoform X1	PSMD4.1	1.95	8.248	6	2	10	2	1	380	41.1	4.81
XP_025128153	histone H3.3-like, partial	LOC102414870	1.95	5.564	13	2	4	0	4	141	15.7	11.12
XP_025120496	beta-defensin 115	DEFB115	1.95	3.325	7	1	1	1	1	145	16	8.7
XP_025134135	cullin-3 isoform X1	CUL3.2	1.97	44.062	6	6	35	6	1	784	90.7	8.48
XP_025134137	cullin-3 isoform X4	CUL3.3	1.97	44.062	7	6	35	6	1	712	82.3	7.96
XP_025134136	cullin-3 isoform X3	CUL3.4	1.97	44.062	7	6	35	6	1	718	82.9	8.51
XP_025123087	14-3-3 protein eta isoform X1	YWHAH	1.97	18.884	6	3	35	0	3	246	28.2	4.89
XP_006051063	14-3-3 protein eta isoform X2	YWHAH.1	1.97	18.884	6	3	35	0	3	233	26.7	4.93
XP_025126798	duodenase-1-like isoform X2	LOC112580795	1.97	12.903	13	2	13	2	1	218	24.2	9.66
XP_025126800	duodenase-1-like isoform X4	LOC112580795.1	1.97	12.903	12	2	13	2	1	252	27.7	9.2
XP_025127222	serpin A3-7-like	LOC102410174	1.98	6.214	4	2	4	1	1	417	46.8	5.81
XP_006061856	protein NDRG3-like	LOC102409754	1.98	2.569	3	1	1	1	1	375	41.1	5.31
XP_025119305	protein NDRG3 isoform X3	NDRG3	1.98	2.569	3	1	1	1	1	375	41.2	5.31
XP_025119307	protein NDRG3 isoform X5	NDRG3.1	1.98	2.569	3	1	1	1	1	359	39.3	5.8
XP_025119308	protein NDRG3 isoform X6	NDRG3.2	1.98	2.569	3	1	1	1	1	348	38	5.83
XP_025119303	protein NDRG3 isoform X2	NDRG3.3	1.98	2.569	3	1	1	1	1	376	41.2	5.39
XP_025119302	protein NDRG3 isoform X1	NDRG3.4	1.98	2.569	3	1	1	1	1	388	42.7	5.33
XP_025119306	protein NDRG3 isoform X4	NDRG3.5	1.98	2.569	3	1	1	1	1	367	40.2	5.49
XP_025119866	ferritin heavy chain	LOC112577774	1.99	22.381	23	4	14	4	1	181	21	5.87
XP_006069362	heat shock protein HSP 90-beta	HSP90AB1	1.99	9.036	3	2	8	1	1	724	83.2	5.03
XP_006077264	endoplasmin	HSP90B1	1.99	5.792	2	1	2	1	1	804	92.4	4.84
XP_025152300	LOW QUALITY PROTEIN: thrombospondin type-1 domain-containing protein 4	THSD4	2.01	4.425	2	2	3	2	1	1017	111.9	7.78
XP_006056975	pyruvate kinase PKM isoform X3	PKM	2.02	29.547	19	6	44	6	1	531	57.9	7.69
XP_025151997	pyruvate kinase PKM isoform X2	PKM.1	2.02	29.547	23	6	44	6	1	436	47.4	6.3
XP_025151996	pyruvate kinase PKM isoform X1	PKM.2	2.02	29.547	19	6	44	6	1	531	58	7.53
XP_006047665	26S proteasome non-ATPase regulatory subunit 7	PSMD7	2.02	3.568	4	1	2	1	1	322	36.7	6.77
XP_025145440	epididymis-specific alpha-mannosidase-like isoform X1	LOC102408883	2.03	53.359	13	11	55	9	1	995	113.8	6.55
XP_025133211	uncharacterized protein LOC112582609, partial	LOC112582609	2.03	1.981	3	1	1	1	1	289	32	9.58
XP_025133684	LOW QUALITY PROTEIN: uncharacterized protein LOC112582881	LOC112582881	2.03	1.981	3	1	1	1	1	265	29.2	9.91
XP_025120395	beta-defensin 116, partial	DEFB116	2.06	14.153	15	1	15	1	1	116	13.2	8.38
XP_006048554	prefoldin subunit 2	PFDN2	2.06	10.735	28	3	12	3	1	154	16.7	6.58
XP_025152321	LOW QUALITY PROTEIN: seminal ribonuclease-like	LOC102390014	2.07	80.66	30	7	126	5	1	151	16.7	9.39
XP_006051755	protein S100-A12	LOC102397920	2.08	15.339	24	2	7	2	1	92	10.8	6.38
XP_025116748	V-type proton ATPase subunit E 2 isoform X2	ATP6V1E2	2.08	7.553	10	2	4	2	1	211	24.4	6.04
XP_025116743	V-type proton ATPase subunit E 2 isoform X1	ATP6V1E2.1	2.08	7.553	6	2	4	2	1	376	40.9	9.76
XP_006074799	LOW QUALITY PROTEIN: eukaryotic translation initiation factor 2-alpha kinase 3	EIF2AK3	2.09	1.711	1	1	1	1	1	1117	124.9	5.49
XP_006071338	adenylosuccinate lyase	ADSL	2.11	7.242	4	1	1	1	1	490	55.4	6.65
XP_025151839	adenylosuccinate lyase-like	LOC102389658	2.11	7.242	5	1	1	1	1	427	48.2	6.32
XP_006042478	lysosomal acid phosphatase isoform X2	ACP2	2.12	5.199	3	1	2	1	1	394	44.7	6.9
XP_006042476	lysosomal acid phosphatase isoform X1	ACP2.1	2.12	5.199	3	1	2	1	1	423	48.2	7.02
XP_006062480	histone H3.3C-like	LOC102395983	2.12	2.107	7	1	3	0	4	136	15.7	11.34
XP_006062028	histone H3.3	LOC102414136	2.12	2.107	7	1	3	0	4	136	15.3	11.12
XP_006069382	immunoglobulin J chain	JCHAIN	2.13	19.593	23	5	19	5	1	158	17.8	5.22
XP_006055761	synaptic vesicle membrane protein VAT-1 homolog	VAT1	2.15	8.297	7	2	16	2	1	402	42.8	6.44
XP_006041293	hormone-sensitive lipase isoform X3	LIPE.1	2.15	4.15	2	1	3	1	1	756	82.5	6.92
XP_006041291	hormone-sensitive lipase isoform X2	LIPE.2	2.15	4.15	2	1	3	1	1	802	88	8.05
XP_006045228	GDP-L-fucose synthase isoform X1	TSTA3	2.15	2.594	4	1	2	1	1	321	36	6.71
XP_025120699	GDP-L-fucose synthase isoform X2	TSTA3.1	2.15	2.594	4	1	2	1	1	278	31.2	6.7
XP_025152151	histone H4-like	LOC102392571	2.17	22.6	23	3	8	3	1	103	11.3	11.36
XP_006044419	cathepsin F isoform X1	CTSF	2.17	8.581	5	2	3	2	1	460	50.8	8.35
XP_006044420	cathepsin F isoform X2	CTSF.1	2.17	8.581	5	2	3	2	1	459	50.6	8.46
XP_006046781	ras-related protein Rab-11B isoform X1	RAB11B	2.19	21.878	14	3	16	3	1	218	24.5	5.94
XP_006050272	ras-related protein Rab-11A	RAB11A	2.19	21.878	14	3	16	3	1	216	24.4	6.57
XP_025149162	ras-related protein Rab-11B isoform X2	RAB11B.1	2.19	21.878	16	3	16	3	1	191	21.5	6.93
XP_025137332	insulin-like peptide INSL6	LOC102413732	2.21	3.218	4	1	5	1	1	205	24	9.07
XP_025127285	heat shock protein HSP 90-alpha	HSP90AA1	2.22	88.111	20	18	86	17	1	733	84.7	5.01
XP_025137776	amyloid-beta A4 protein isoform X7	APP.4	2.24	19.137	6	4	14	3	1	677	76.7	4.83
XP_025137759	amyloid-beta A4 protein isoform X5	APP.5	2.24	19.137	6	4	14	3	1	714	80.7	4.87
XP_025137769	amyloid-beta A4 protein isoform X6	APP.6	2.24	19.137	6	4	14	3	1	695	78.6	4.84
XP_025124332	ankyrin repeat domain-containing protein 11 isoform X5	ANKRD11	2.24	2.032	0	1	3	1	1	2567	287	7.11
XP_025124323	ankyrin repeat domain-containing protein 11 isoform X1	ANKRD11.1	2.24	2.032	0	1	3	1	1	2624	293.2	7.24
XP_025124327	ankyrin repeat domain-containing protein 11 isoform X2	ANKRD11.2	2.24	2.032	0	1	3	1	1	2601	290.4	7.14
XP_025124331	ankyrin repeat domain-containing protein 11 isoform X4	ANKRD11.3	2.24	2.032	0	1	3	1	1	2595	290	7.47
XP_025124330	ankyrin repeat domain-containing protein 11 isoform X3	ANKRD11.4	2.24	2.032	0	1	3	1	1	2600	290.2	7.34
XP_025124812	glucose-6-phosphate isomerase	GPI	2.25	58.615	21	9	32	9	1	557	62.9	7.71
XP_006067329	40S ribosomal protein S5	RPS5	2.25	6.79	7	1	2	1	1	204	22.9	9.72
XP_025135821	peptide YY isoform X4	LOC102414386	2.27	16.188	30	2	43	2	1	97	11.1	7.34
XP_025135819	transmembrane protein 101 isoform X2	LOC102414386.1	2.27	16.188	12	2	43	2	1	252	28.5	9.66
XP_006052418	tubulin beta chain	TUBB	2.29	21.629	15	4	12	4	1	444	49.6	4.89
XP_025120766	tubulin beta-2B chain isoform X2	LOC102411164	2.29	1.894	7	1	1	1	1	373	41.9	4.91
XP_025150853	beta-2-microglobulin	LOC112587746	2.3	120.304	58	9	189	9	1	118	13.6	8
XP_025145441	epididymis-specific alpha-mannosidase-like isoform X2	LOC102408883.1	2.3	51.34	13	10	54	8	1	949	108.7	6.4
XP_006054070	V-type proton ATPase subunit B, brain isoform	ATP6V1B2	2.31	70.867	24	8	38	8	1	511	56.5	5.81
XP_006046920	caltrin	LOC102413729	2.32	49.591	30	6	147	6	1	140	15.6	10.15
XP_006055529	14-3-3 protein sigma	SFN	2.34	5.697	7	2	23	0	3	248	27.8	4.77
XP_025122254	ecto-ADP-ribosyltransferase 5-like isoform X1	LOC102399593.2	2.35	67.454	28	7	106	1	1	310	33.9	7.09
XP_006052700	vinculin isoform X2	VCL	2.35	7.472	2	1	5	1	1	1134	123.8	5.76
XP_006052702	vinculin isoform X4	VCL.1	2.35	7.472	2	1	5	1	1	1066	116.6	6.09
XP_006052699	vinculin isoform X1	VCL.2	2.35	7.472	2	1	5	1	1	1135	123.9	5.81
XP_006052701	vinculin isoform X3	VCL.3	2.35	7.472	2	1	5	1	1	1067	116.8	6.16
XP_025130069	cytochrome c 2	LOC112581627	2.36	26.057	41	5	24	3	1	105	11.7	9.44
XP_025146909	mammalian ependymin-related protein 1	EPDR1	2.36	3.811	5	1	4	1	1	236	26.5	7.8
XP_025152195	uncharacterized protein LOC102395477	LOC102395477	2.46	37.3	33	8	26	5	1	333	37.1	11.36
XP_025152187	uncharacterized protein LOC102411988	LOC102411988	2.46	37.3	34	8	26	5	1	328	36.5	11.3
XP_025152210	histone H3.1-like	LOC102409669	2.46	37.3	32	8	26	5	1	218	24.4	11.11
XP_025126990	duodenase-1	LOC102397582	2.46	14.015	6	1	13	1	1	251	27.4	9.36
XP_006044042	pleckstrin homology domain-containing family S member 1 isoform X3	PLEKHS1	2.48	2.164	1	1	4	1	1	433	49	6.19
XP_006044040	pleckstrin homology domain-containing family S member 1 isoform X1	PLEKHS1.1	2.48	2.164	1	1	4	1	1	470	53.1	7.52
XP_025121364	lymphocyte antigen 6K	LY6K	2.48	2.164	4	1	4	1	1	156	17.1	7.8
XP_025129708	pleckstrin homology domain-containing family S member 1 isoform X4	PLEKHS1.2	2.48	2.164	1	1	4	1	1	416	47.1	6.6
XP_006044041	pleckstrin homology domain-containing family S member 1 isoform X2	PLEKHS1.3	2.48	2.164	1	1	4	1	1	469	52.9	7.52
XP_006057193	14-3-3 protein gamma	YWHAG	2.5	34.746	18	5	47	1	1	247	28.3	4.89
XP_006063057	prosaposin isoform X3	PSAP.2	2.55	23.751	13	4	14	4	1	525	58.1	5.15
XP_025144170	LOW QUALITY PROTEIN: cAMP-dependent protein kinase catalytic subunit beta	PRKACB	2.55	2.529	3	1	1	1	1	351	40.6	8.56
XP_025131692	dipeptidyl peptidase 4 isoform X2	DPP4	2.61	2.735	2	1	1	1	1	712	82.5	6.16
XP_025131698	dipeptidyl peptidase 4 isoform X3	DPP4.1	2.61	2.735	3	1	1	1	1	678	78	6.68
XP_025131690	dipeptidyl peptidase 4 isoform X1	DPP4.2	2.61	2.735	2	1	1	1	1	765	88.4	6.47
XP_025126641	beta-hexosaminidase subunit beta isoform X1	LOC102407744	2.64	35.012	6	4	27	4	1	537	61.3	7.77
XP_006065542	dehydrogenase/reductase SDR family member 11 isoform X3	DHRS11	2.66	7.454	4	1	1	1	1	330	35.7	7.15
XP_025136916	dehydrogenase/reductase SDR family member 11 isoform X1	DHRS11.1	2.66	7.454	4	1	1	1	1	399	43	7.01
XP_025136917	dehydrogenase/reductase SDR family member 11 isoform X2	DHRS11.2	2.66	7.454	4	1	1	1	1	368	39.6	7.14
XP_025136918	dehydrogenase/reductase SDR family member 11 isoform X4	DHRS11.3	2.66	7.454	5	1	1	1	1	299	32.2	7.36
XP_006079904	ubiquitin-like modifier-activating enzyme 6	UBA6	2.69	2.293	1	1	4	1	1	1057	118.7	5.74
XP_025118007	epididymal-specific lipocalin-5 isoform X1	LOC102389470	2.75	139.676	43	10	147	10	1	205	22.2	8.18
XP_025118010	epididymal-specific lipocalin-5 isoform X4	LOC102389470.1	2.75	139.676	49	10	147	10	1	180	19.7	7.53
XP_025118009	epididymal-specific lipocalin-5 isoform X3	LOC102389470.2	2.75	139.676	46	10	147	10	1	193	20.9	7.18
XP_025118008	epididymal-specific lipocalin-5 isoform X2	LOC102389470.3	2.75	139.676	44	10	147	10	1	204	22.1	8.18
XP_006060380	putative hexokinase HKDC1	HKDC1	2.75	2.521	1	1	14	1	1	917	102.5	6.57
XP_006067964	hexokinase-2 isoform X1	HK2	2.75	2.521	1	1	14	1	1	917	102.4	6.18
XP_025148380	prefoldin subunit 1 isoform X3	PFDN1	2.76	1.758	7	1	3	1	1	103	12	5.86
XP_025148379	prefoldin subunit 1 isoform X2	PFDN1.1	2.76	1.758	6	1	3	1	1	122	14.2	6.81
XP_025143734	histone H4	LOC102412113	2.8	29.629	41	5	19	5	1	103	11.4	11.36
XP_006067791	histone H4-like	LOC102414837	2.8	9.781	27	3	12	3	1	103	11.3	11.22
XP_006074042	histone H4-like	LOC102406674	2.8	4.129	10	1	6	1	1	103	11.2	10.86
XP_025121775	membrane-spanning 4-domains subfamily A member 14	MS4A14	2.83	1.532	1	1	1	1	1	860	97.2	5.38
XP_006071332	hsc70-interacting protein isoform X2	ST13	2.86	59.29	16	6	39	6	1	369	41.4	5.31
XP_025138590	hsc70-interacting protein isoform X1	ST13.1	2.86	59.29	15	6	39	6	1	375	42	5.33
XP_006070478	prostasin	PRSS8	2.87	2.955	5	1	2	1	1	342	36.8	6.62
XP_025126200	alpha-1B-glycoprotein isoform X2	A1BG	2.88	77.691	34	10	69	10	1	491	52.5	5.62
XP_025126199	alpha-1B-glycoprotein isoform X1	A1BG.1	2.88	77.691	33	10	69	10	1	503	53.7	5.52
XP_025126304	interleukin-6 receptor subunit beta	IL6ST	2.9	17.038	3	2	4	2	1	918	103.9	6.05
XP_025120761	tubulin beta-2B chain isoform X1	LOC102411164.1	2.91	17.304	10	3	10	3	1	445	49.9	4.89
XP_025120717	tubulin beta-2A chain	TUBB2A	2.91	17.304	10	3	10	3	1	445	49.9	4.89
XP_006071599	trefoil factor 3	TFF3	2.91	3.187	26	1	2	1	1	95	10.3	4.72
XP_006053926	vertnin	VRTN	3	1.284	1	1	2	1	1	700	77.6	9.89
XP_006051404	protein WFDC11	WFDC11	3.07	7.182	15	1	1	1	1	93	11	8.07
XP_025151793	angiogenin-1-like	LOC102389011	3.1	4.508	8	1	7	1	1	148	17.2	9.67
XP_006066766	beta-1,4-galactosyltransferase 1	B4GALT1	3.1	4.431	7	1	2	1	1	402	44.7	9.31
XP_025118124	UTP--glucose-1-phosphate uridylyltransferase isoform X4	UGP2.3	3.16	22.803	13	5	22	5	1	431	47.9	8.56
XP_006056528	Sjoegren syndrome/scleroderma autoantigen 1	SSSCA1	3.16	5.286	14	2	3	2	1	199	21.5	5.12
XP_006062856	cystatin-C	LOC102403789	3.18	125.987	52	8	94	8	1	155	17.2	8.85
XP_006073828	protein disulfide-isomerase A6	PDIA6	3.19	5.916	3	1	5	1	1	440	48.1	5.1
XP_025122809	platelet-derived growth factor D isoform X1	PDGFD	3.27	5.759	4	2	4	2	1	370	42.7	7.91
XP_025122811	platelet-derived growth factor D isoform X2	PDGFD.1	3.27	5.759	4	2	4	2	1	364	42	8.03
XP_006048532	apolipoprotein A-II isoform X1	APOA2	3.28	15.126	43	3	6	3	1	100	11.2	8.1
XP_006076191	platelet-activating factor acetylhydrolase isoform X1	PLA2G7	3.3	1.349	3	1	4	1	1	444	50	6.54
XP_006076201	platelet-activating factor acetylhydrolase isoform X2	PLA2G7.1	3.3	1.349	4	1	4	1	1	399	44.9	6.61
XP_006052070	ubiquilin-4 isoform X1	UBQLN4	3.31	2.913	3	1	3	1	1	601	63.9	5.31
XP_006042025	ubiquilin-1 isoform X1	UBQLN1	3.31	2.913	3	1	3	1	1	589	62.4	5.11
XP_006042026	ubiquilin-1 isoform X2	UBQLN1.1	3.31	2.913	3	1	3	1	1	561	59.1	5.1
XP_025143471	ubiquilin-4 isoform X2	UBQLN4.1	3.31	2.913	3	1	3	1	1	555	58.8	5.47
XP_006080129	L-amino-acid oxidase isoform X2	IL4I1	3.5	26.822	12	5	11	5	1	587	65.4	9.41
XP_025125801	L-amino-acid oxidase isoform X3	IL4I1.1	3.5	26.822	12	5	11	5	1	584	65.1	9.47
XP_025125799	L-amino-acid oxidase isoform X1	IL4I1.2	3.5	26.822	11	5	11	5	1	624	69.3	9.38
XP_025149897	histone H4-like	LOC102391078	3.6	2.901	8	1	5	1	1	99	10.9	10.52
XP_025118016	lipocalin-1 isoform X1	LCN1.1	4.66	82.361	76	10	176	1	1	178	19.6	4.73
XP_025144973	UDP-glucuronosyltransferase 1-6 isoform X5	LOC102392295	4.67	1.507	5	1	1	1	1	524	60	8.6
XP_025141116	membrane cofactor protein-like	LOC102399908	4.96	14.447	8	1	11	1	1	301	33.2	5.9
XP_025124586	cocaine esterase isoform X1	CES2	5.24	1.93	1	1	7	1	1	583	64.9	6.02
XP_025124590	carboxylesterase 4A isoform X3	CES4A	5.24	1.93	1	1	7	1	1	550	61.8	8.87
XP_006072144	cocaine esterase isoform X2	CES2.1	5.24	1.93	1	1	7	1	1	570	63.7	6.18
XP_025124588	carboxylesterase 4A isoform X1	CES4A.1	5.24	1.93	1	1	7	1	1	577	64.5	8.79
XP_025131209	acetylcholinesterase isoform X4	ACHE	5.24	1.93	1	1	7	1	1	615	66.9	6.48
XP_006046512	acetylcholinesterase isoform X1	ACHE.1	5.24	1.93	1	1	7	1	1	685	74.2	7.91
XP_006046513	acetylcholinesterase isoform X2	ACHE.2	5.24	1.93	1	1	7	1	1	684	74.2	7.91
XP_006046514	acetylcholinesterase isoform X3	ACHE.3	5.24	1.93	1	1	7	1	1	683	74.9	7.23
XP_025124589	carboxylesterase 4A isoform X2	CES4A.2	5.24	1.93	1	1	7	1	1	576	64.4	8.7
XP_025137765	terminal uridylyltransferase 7 isoform X5	TUT7	5.49	1.307	1	1	1	1	1	1536	174.1	7.23
XP_025137767	terminal uridylyltransferase 7 isoform X7	TUT7.1	5.49	1.307	1	1	1	1	1	1481	169.3	7.11
XP_006066910	terminal uridylyltransferase 7 isoform X3	TUT7.2	5.49	1.307	1	1	1	1	1	1548	175.1	7.34
XP_025137764	terminal uridylyltransferase 7 isoform X4	TUT7.3	5.49	1.307	1	1	1	1	1	1545	176.2	7.37
XP_025137766	terminal uridylyltransferase 7 isoform X6	TUT7.4	5.49	1.307	1	1	1	1	1	1498	171.2	7.3
XP_025137760	terminal uridylyltransferase 7 isoform X1	TUT7.5	5.49	1.307	1	1	1	1	1	1574	178.3	7.15
XP_025137762	terminal uridylyltransferase 7 isoform X2	TUT7.6	5.49	1.307	1	1	1	1	1	1550	177.2	7.39
XP_025147484	cationic trypsin-like	LOC102403209	5.62	128.268	52	9	1327	1	1	246	25.9	7.91

## Sheet: PIPLC
Accession	Description	Gene Name	Abundance Ratio (log2): (PIPLC, Sample) / (PIPLC-CONTROL, Control)	Sum PEP Score	Coverage [%]	# Peptides	# PSMs	# Unique Peptides	# Protein Groups	# AAs	MW [kDa]	calc. pI
XP_006078224	10 kDa heat shock protein, mitochondrial isoform X2	LOC102406576	3.88	20.199	28	2	5	2	1	102	10.9	8.92
XP_006046494	14-3-3 protein zeta/delta	YWHAZ	-0.57	14.43	16	4	10	4	1	245	27.7	4.79
XP_006073535	40S ribosomal protein S17	RPS17	2.32	1.573	13	1	1	1	1	205	23.2	10.15
XP_006072360	40S ribosomal protein S21	RPS21	-0.41	5.691	28	1	1	1	1	83	9.1	8.5
XP_006059412	40S ribosomal protein S23	RPS23	4.88	4.522	20	1	3	1	1	143	15.8	10.49
XP_006074139	40S ribosomal protein S3	RPS3	5	5.914	7	1	3	1	1	243	26.7	9.66
XP_006061062	40S ribosomal protein S3a	RPS3A	6.02	8.062	6	1	9	1	1	264	29.9	9.73
XP_006067329	40S ribosomal protein S5	RPS5	4.69	7.73	7	1	4	1	1	204	22.9	9.72
XP_025121296	40S ribosomal protein S6	LOC102400785	-0.93	6.356	8	1	1	1	1	249	28.6	10.84
XP_006078222	60 kDa heat shock protein, mitochondrial	HSPD1	6.26	223.036	33	15	383	15	1	573	60.9	5.87
XP_006043695	60S ribosomal protein L10 isoform X1	RPL10	1.37	6.181	13	1	1	1	1	214	24.6	10.14
XP_025133109	60S ribosomal protein L10 isoform X2	RPL10.1	1.37	6.181	19	1	1	1	1	145	16.5	9.45
XP_006066222	60S ribosomal protein L10-like	RPL10L	1.37	6.181	13	1	1	1	1	214	24.5	10.18
XP_006074559	60S ribosomal protein L12	RPL12	3.29	3.251	11	1	1	1	1	165	17.8	9.42
XP_006075303	60S ribosomal protein L17	LOC102401704	4.09	4.295	10	1	2	1	1	184	21.4	10.18
XP_006048940	60S ribosomal protein L22	RPL22	4.38	4.404	20	1	2	1	1	128	14.8	9.19
XP_006070127	60S ribosomal protein L8	RPL8	-0.59	9.786	9	2	2	2	1	257	28	11.03
XP_025141775	60S ribosomal protein L9	LOC112585098	-0.88	6.742	21	1	1	1	1	192	21.9	9.95
XP_025148263	acrosin inhibitor 1	LOC102401452	6.64	41.761	36	5	78	5	1	85	10	4.61
XP_025138352	acrosin isoform X1	ACR.1	-2.09	75.976	27	11	47	11	1	414	45.4	9.45
XP_025138353	acrosin isoform X2	ACR	-2.09	75.976	30	11	47	11	1	377	41.5	9.44
XP_006065879	acrosin-binding protein isoform X1	ACRBP.2	-2.33	85.326	22	10	89	10	1	542	61.3	5.02
XP_025138879	acrosin-binding protein isoform X2	ACRBP	-2.02	44.683	15	7	74	7	1	486	54.9	4.97
XP_025138880	acrosin-binding protein isoform X3	ACRBP.1	-2.33	73.702	22	8	74	8	1	469	53.3	4.97
XP_025142152	acrosomal protein SP-10	ACRV1	0.18	51.481	21	6	36	6	1	273	28.9	4.63
NP_001277861	actin, cytoplasmic 1	ACTB	4.97	76.406	31	9	81	6	1	375	41.6	5.3
XP_025130274	actin, cytoplasmic 1 isoform X1	ACTB.1	4.97	76.406	31	9	81	6	1	375	41.7	5.48
XP_025135478	actin, cytoplasmic 2	ACTG1	4.97	76.406	31	9	81	6	1	375	41.8	5.48
XP_025137973	actin-like protein 7A	ACTL7A	4.62	5.746	4	1	2	1	1	438	49	6.99
XP_006042743	actin-related protein T2	ACTRT2	0.28	10.605	8	2	3	2	1	377	41.9	5.6
XP_006054730	adenylate kinase 2, mitochondrial isoform X1	AK2	1.23	7.551	10	1	1	1	1	241	26.5	8.13
XP_006054731	adenylate kinase 2, mitochondrial isoform X2	AK2.1	1.23	7.551	11	1	1	1	1	234	25.6	8.24
XP_006074532	adenylate kinase isoenzyme 1 isoform X1	AK1.1	0.57	11.272	23	3	6	3	1	211	23.4	8.1
XP_006074537	adenylate kinase isoenzyme 1 isoform X2	AK1	0.57	11.272	25	3	6	3	1	194	21.7	7.91
XP_025122423	ADM isoform X1	ADM.1	5.22	25.149	24	5	52	5	1	189	21.1	11.06
XP_025122424	ADM isoform X2	ADM	4.17	11.939	16	3	19	3	1	188	21	11.06
XP_006059541	A-kinase anchor protein 4 isoform X1	AKAP4	-0.13	24.893	9	5	5	5	1	860	95.6	6.87
XP_006059540	A-kinase anchor protein 4 isoform X2	AKAP4.1	-0.13	24.893	9	5	5	5	1	848	94.3	6.79
XP_025132614	allergen Bos d 2-like	LOC102396043	6.64	3.285	3	1	6	1	1	276	31.4	5.12
XP_006074847	allergen Bos d 2-like isoform X1	LOC102393892	4.58	5.981	10	1	6	1	1	172	19.2	4.73
NP_001277864	alpha-1-acid glycoprotein 1	ORM1	-5.24	84.516	30	8	132	8	1	166	19.3	5.64
XP_006076743	alpha-enolase isoform X1	ENO1.1	4.72	44.762	24	6	91	6	1	434	47.3	6.8
XP_006076744	alpha-enolase isoform X2	ENO1	4.72	44.762	24	6	91	6	1	434	47.4	6.46
XP_025145699	alpha-fetoprotein	AFP	-6.64	4.885	1	2	114	2	1	610	68.5	6.29
XP_025151784	angiogenin	ANG	4.56	10.195	22	2	8	2	1	148	16.9	8.66
XP_006043337	annexin A2	ANXA2	1.3	2.133	5	1	1	1	1	339	38.6	7.31
XP_025140668	anthrax toxin receptor-like	LOC112584712	-1.21	4.532	3	1	1	1	1	579	64.6	6.52
XP_006067602	apolipoprotein E	APOE	3.12	3.909	3	1	3	1	1	316	36	5.68
XP_025132373	apoptosis-inducing factor 1, mitochondrial isoform X1	AIFM1.1	4.97	8.704	3	1	3	1	1	613	66.8	9.11
XP_025132374	apoptosis-inducing factor 1, mitochondrial isoform X2	AIFM1	4.97	8.704	3	1	3	1	1	609	66.2	9.04
XP_006075344	ATP synthase subunit alpha, mitochondrial	ATP5F1A	4.67	35.183	14	5	16	5	1	553	59.7	9.19
XP_006075049	ATP synthase subunit beta, mitochondrial	ATP5F1B	0.53	65.008	16	4	33	4	1	528	56.3	5.27
XP_025130746	ATP-binding cassette sub-family A member 17 isoform X1	LOC102393607	-3.63	1.877	1	1	2	1	1	1777	201.1	6.71
XP_025130747	ATP-binding cassette sub-family A member 17 isoform X2	LOC102393607.1	-3.63	1.877	1	1	2	1	1	1604	180.5	6.49
XP_025130748	ATP-binding cassette sub-family A member 17 isoform X3	LOC102393607.2	-3.63	1.877	1	1	2	1	1	1557	175.3	6.6
XP_006062505	atypical kinase COQ8A, mitochondrial isoform X1	COQ8A	4.37	6.131	3	1	4	1	1	648	72.1	6.54
XP_025141812	atypical kinase COQ8A, mitochondrial isoform X2	COQ8A.1	4.37	6.131	4	1	4	1	1	565	63.2	7.05
XP_025150853	beta-2-microglobulin	LOC112587746	6.64	8.728	14	1	11	1	1	118	13.6	8
XP_025124399	beta-defensin 112 isoform X3	LOC102395067.1	5.12	4.481	17	2	4	2	1	121	13.8	8.78
XP_025120495	beta-defensin 121 isoform X2	LOC102413260	6.64	9.594	15	1	17	1	1	80	9.3	7.61
XP_006049642	beta-defensin 129	DEFB129	4.57	2.699	5	1	1	1	1	170	19.2	9.42
XP_006060126	beta-enolase isoform X1	ENO3	5.67	28.645	13	3	86	3	1	440	47.7	8.34
XP_006060127	beta-enolase isoform X2	ENO3.1	5.67	28.645	13	3	86	3	1	434	47	7.97
XP_006062109	brain ribonuclease	LOC102389674	1.51	9.495	8	1	12	0	2	167	18.3	9.47
XP_006047698	cadherin-1	CDH1	4.91	2.476	1	1	1	1	1	883	98.1	4.88
XP_025129120	calcium-binding tyrosine phosphorylation-regulated protein isoform X1	CABYR.1	-1.82	17.063	6	3	9	3	1	454	48.7	4.89
XP_025130476	calcium-regulated heat-stable protein 1	CARHSP1	3.03	1.924	8	1	1	1	1	147	15.9	7.87
XP_006073663	calicin	CCIN	-0.91	12.074	5	2	2	2	1	588	66.8	8.25
XP_025150878	calmodulin-1 isoform X1	CALM1	3.91	30.38	41	4	21	4	1	150	17	4.22
XP_006054867	calmodulin-2	CALM2	3.91	30.38	42	4	21	4	1	149	16.8	4.22
XP_025132787	calmodulin-like	LOC102416387	4.34	9.164	12	1	4	1	1	139	16	4.46
XP_006043080	calmodulin-like	LOC102393421	4.38	24.951	30	3	20	3	1	149	16.8	4.27
XP_006048328	calmodulin-like	LOC102403292	5.28	15.788	20	2	16	2	1	148	16.8	4.39
XP_006046920	caltrin	LOC102413729	6.61	19.541	27	5	45	5	1	140	15.6	10.15
XP_025132121	cancer/testis antigen 47A	LOC102397898	5.5	6.981	9	1	10	1	1	253	26.9	4.5
XP_025120842	carboxypeptidase Q isoform X1	CPQ	-2.31	50.631	20	7	28	7	1	498	54.5	6.09
XP_025120843	carboxypeptidase Q isoform X2	CPQ.1	-2.31	50.631	21	7	28	7	1	483	52.8	6.09
XP_025148498	casein kinase I isoform X1	CSNK1G2	2.58	2.958	4	1	1	1	1	414	47.2	9.06
XP_006044419	cathepsin F isoform X1	CTSF	-1.66	9.143	5	2	2	2	1	460	50.8	8.35
XP_006044420	cathepsin F isoform X2	CTSF.1	-1.66	9.143	5	2	2	2	1	459	50.6	8.46
XP_006052153	cationic trypsin	LOC102403534	3.6	154.961	48	13	1015	5	1	246	25.8	7.91
XP_025147484	cationic trypsin-like	LOC102403209	-0.72	117.772	52	9	1156	1	1	246	25.9	7.91
XP_006063186	ceruloplasmin isoform X1	CP	-1.35	28.285	10	7	11	7	1	1090	124.2	6.19
XP_025145881	ceruloplasmin isoform X2	CP.2	-1.35	28.285	10	7	11	7	1	1061	120.6	6.13
XP_025145887	ceruloplasmin isoform X3	CP.1	-1.35	28.285	10	7	11	7	1	1059	120.5	6.13
XP_006074367	chromobox protein homolog 1	CBX1	5.36	13.522	9	1	10	1	1	185	21.4	4.93
XP_006066118	chromobox protein homolog 3 isoform X1	CBX3.1	5.36	13.522	9	1	10	1	1	183	20.8	5.33
XP_006066119	chromobox protein homolog 3 isoform X2	CBX3	5.36	13.522	9	1	10	1	1	173	19.7	5.12
XP_006063778	chromobox protein homolog 5	CBX5	4.39	2.858	12	1	1	1	1	191	22.2	5.86
XP_006072656	cilia- and flagella-associated protein 20	CFAP20	6.64	1.907	4	1	5	1	1	193	22.7	9.76
XP_006073660	clathrin light chain A isoform X3	CLTA	3.36	3.953	10	1	1	1	1	213	23.4	4.53
XP_006060322	clusterin	CLU	3.76	72.662	25	13	102	13	1	439	51	6.07
XP_025134937	clusterin-like	LOC102393597	0.74	4.91	6	1	6	1	1	214	24.4	8.43
XP_006056514	cofilin-1	CFL1	6.64	10.575	17	1	4	1	1	166	18.5	8
XP_006065650	coiled-coil domain-containing protein 116 isoform X1	CCDC116.1	4.45	5.066	2	1	3	1	1	625	68.8	9.67
XP_006065651	coiled-coil domain-containing protein 116 isoform X2	CCDC116	4.45	5.066	2	1	3	1	1	617	68	9.74
XP_006074448	coiled-coil domain-containing protein 136 isoform X1	CCDC136.3	6.64	5.095	1	1	5	1	1	1204	138.8	4.77
XP_006074449	coiled-coil domain-containing protein 136 isoform X2	CCDC136	6.64	5.095	1	1	5	1	1	1201	138.1	4.75
XP_025147271	coiled-coil domain-containing protein 136 isoform X3	CCDC136	6.64	8.728	2	2	7	2	1	1044	121.3	4.87
XP_006074453	coiled-coil domain-containing protein 136 isoform X4	CCDC136.2	6.64	5.095	1	1	5	1	1	985	113.5	4.79
XP_006041214	collagen alpha-1(I) chain	COL1A1	3.28	2.309	1	1	2	1	1	1463	138.9	5.78
XP_025141916	complement factor H isoform X1	LOC102394267	3.38	6.828	3	3	6	3	1	1239	140.3	6.58
XP_025141925	complement factor H isoform X1	LOC102416626.2	3.38	2.287	1	1	2	1	1	1021	116.1	7.56
XP_025141918	complement factor H isoform X2	LOC102394267.1	3.38	6.828	3	3	6	3	1	1181	133.9	6.76
XP_025141926	complement factor H isoform X2	LOC102416626.1	3.38	2.287	1	1	2	1	1	991	112.6	7.46
XP_025141919	complement factor H isoform X3	LOC102394267.3	3.38	6.828	3	3	6	3	1	1181	133.7	6.86
XP_025141927	complement factor H isoform X3	LOC102416626	3.38	2.287	1	1	2	1	1	963	109.3	7.47
XP_025141928	complement factor H isoform X4	LOC102416626.5	3.38	2.287	1	1	2	1	1	902	102.6	7.42
XP_025141920	complement factor H isoform X4	LOC102394267.7	3.92	4.541	2	2	4	2	1	1179	133.6	6.89
XP_025141921	complement factor H isoform X5	LOC102394267.6	3.38	6.828	3	3	6	3	1	1122	127.2	6.64
XP_025141929	complement factor H isoform X5	LOC102416626.3	3.38	2.287	1	1	2	1	1	897	101.5	7.34
XP_025141922	complement factor H isoform X6	LOC102394267.4	3.38	6.828	3	3	6	3	1	1122	126.9	6.8
XP_025141923	complement factor H isoform X7	LOC102394267.5	3.38	6.828	3	3	6	3	1	1064	120.7	6.93
XP_025141924	complement factor H isoform X8	LOC102394267.2	6.2	2.178	1	1	3	1	1	630	71.5	7.71
XP_006052270	complement factor I	CFI	3.7	1.641	1	1	4	1	1	618	68.9	7.74
XP_025127559	creatine kinase B-type	CKB	5.09	15.905	14	2	5	2	1	381	42.7	5.78
XP_006054757	C-type natriuretic peptide	NPPC	5.89	44.74	61	9	147	9	1	126	13.3	10.2
XP_006080459	CUB and zona pellucida-like domain-containing protein 1	CUZD1	6.64	3.038	7	1	6	1	1	124	13.8	6.27
XP_006056492	cystatin-M	CST6	3.69	4.9	11	1	4	1	1	149	16.4	7.74
XP_006050776	cysteine-rich secretory protein 1	CRISP1	6.64	13.296	5	2	10	2	1	247	28.1	6.86
XP_006050774	cysteine-rich secretory protein 3	LOC102394104	6.64	2.765	9	1	3	1	1	244	27.5	8.28
XP_025117313	cytosolic 5'-nucleotidase 1B isoform X1	LOC102406031	4.21	5.313	4	2	2	2	1	625	71.1	8.85
XP_006054375	cytosolic 5'-nucleotidase 1B isoform X2	LOC102406031	4.21	5.313	4	2	2	2	1	564	64	8.51
XP_006049413	D-3-phosphoglycerate dehydrogenase	PHGDH	3.47	9.065	4	1	2	1	1	533	56.5	6.37
XP_025148547	DAZ-associated protein 1 isoform X1	DAZAP1.1	0.42	4.353	7	1	2	1	1	406	43.3	8.56
XP_025148548	DAZ-associated protein 1 isoform X2	DAZAP1.2	0.42	4.353	7	1	2	1	1	405	43.2	8.56
XP_025148549	DAZ-associated protein 1 isoform X3	DAZAP1	0.42	4.353	7	1	2	1	1	378	40.6	8.12
XP_006041443	deoxyribonuclease gamma	DNASE1L3	5.09	12.797	11	2	7	2	1	305	34.9	9.25
XP_006046486	dihydrolipoyl dehydrogenase, mitochondrial	DLD	4.22	7.576	6	1	2	1	1	509	54.2	7.68
XP_025123310	disintegrin and metalloproteinase domain-containing protein 1a-like	LOC112579918	1.63	9.317	3	2	6	2	1	808	90	6.14
XP_025137116	disintegrin and metalloproteinase domain-containing protein 20-like	LOC112583833	0.14	24.359	6	4	13	4	1	761	86.3	7.08
XP_025137114	disintegrin and metalloproteinase domain-containing protein 20-like	LOC112583832	0.14	19.694	4	3	12	3	1	762	86	7.34
XP_025137117	disintegrin and metalloproteinase domain-containing protein 20-like	LOC112583834	0.14	19.694	4	3	12	3	1	761	86.3	7.55
XP_006056821	DNA replication licensing factor MCM3	MCM3	2.9	8.402	3	1	2	1	1	808	90.7	5.76
XP_006069475	double-headed protease inhibitor, submandibular gland-like	LOC102400278	6.64	31.418	38	4	26	4	1	144	15.8	6.48
XP_025126384	dynein heavy chain 8, axonemal	DNAH8	-0.01	9.006	1	3	22	3	1	4723	540.1	6.04
XP_006053017	dynein light chain 1, cytoplasmic	DYNLL1	-1.19	3.756	12	1	2	1	1	89	10.4	7.4
XP_006053053	dynein light chain 1, cytoplasmic-like	LOC102405475	-1.19	3.756	12	1	2	1	1	89	10.3	7.4
XP_006074052	dynein light chain 1, cytoplasmic-like	LOC102409593	-1.19	3.756	13	1	2	1	1	87	10.1	8.28
XP_006076300	dynein light chain 2, cytoplasmic	DYNLL2	-1.19	3.756	12	1	2	1	1	89	10.3	7.37
XP_025122254	ecto-ADP-ribosyltransferase 5-like isoform X1	LOC102399593.2	3.79	6.53	5	1	3	1	1	310	33.9	7.09
XP_025122255	ecto-ADP-ribosyltransferase 5-like isoform X2	LOC102399593.1	3.79	6.53	5	1	3	1	1	309	33.8	7.09
XP_025122256	ecto-ADP-ribosyltransferase 5-like isoform X3	LOC102399593	3.79	6.53	5	1	3	1	1	298	32.8	6.21
XP_006044468	electron transfer flavoprotein subunit alpha, mitochondrial	ETFA	2.29	23.049	15	3	5	3	1	333	35	8.38
XP_025133680	elongation factor 1-alpha 1	LOC102389646	2.57	30.087	19	5	41	5	1	462	50.1	9.01
XP_006048613	elongation factor 1-alpha 2	EEF1A2	1.62	7.939	5	2	32	2	1	463	50.4	9.03
XP_006042595	elongation factor 2	EEF2	6.48	18.777	4	2	21	2	1	858	95.3	6.83
XP_006077264	endoplasmin	HSP90B1	4.47	6.816	6	2	2	2	1	804	92.4	4.84
XP_006067490	epididymal sperm-binding protein 1	ELSPBP1	-2.72	38.946	39	9	76	9	1	223	26	7.8
XP_025137198	equatorin isoform X4	EQTN	3.31	10.943	10	3	15	3	1	318	35.7	4.58
XP_006045455	eukaryotic translation initiation factor 1A, X-chromosomal	EIF1AX	4.93	9.797	11	1	4	1	1	144	16.5	5.24
XP_006048513	eukaryotic translation initiation factor 3 subunit A isoform X1	EIF3A.1	3.97	6.491	2	1	2	1	1	1376	165.9	6.79
XP_025129892	eukaryotic translation initiation factor 3 subunit A isoform X2	EIF3A	3.97	6.491	2	1	2	1	1	1174	142	6.55
XP_006060222	eukaryotic translation initiation factor 5A-1	EIF5A	5.3	19.347	31	2	7	2	1	154	16.8	5.24
XP_025151254	exocyst complex component 5 isoform X1	EXOC5	-5.59	2.134	3	1	4	1	1	740	85.1	6.87
XP_006048751	exocyst complex component 5 isoform X2	EXOC5.1	-5.59	2.134	3	1	4	1	1	708	81.8	6.71
XP_025146024	extracellular superoxide dismutase [Cu-Zn] isoform X1	SOD3.1	4.61	17.676	11	2	14	2	1	262	28.5	8.51
XP_006041541	extracellular superoxide dismutase [Cu-Zn] isoform X2	SOD3	4.61	17.676	12	2	14	2	1	241	26.2	7.28
XP_006062157	FACT complex subunit SPT16	SUPT16H	2.59	5.056	3	1	1	1	1	1047	119.9	5.66
XP_006044341	fascin	FSCN1	6.25	5.503	5	1	3	1	1	493	54.7	7.01
XP_006058681	fetuin-B	FETUB	5.13	11.185	6	2	29	2	1	387	42.5	5.77
XP_025127145	fibrous sheath CABYR-binding protein	FSCB	5.64	3.763	3	1	7	1	1	747	80.2	4.06
XP_025138473	fibulin-1 isoform X1	FBLN1.1	3.32	1.92	1	1	1	1	1	706	77.6	5.06
XP_025138474	fibulin-1 isoform X2	FBLN1	3.32	1.92	1	1	1	1	1	686	75	5.07
XP_025122250	folate receptor alpha	LOC102390798	3.93	9.885	11	2	10	2	1	241	28.1	8.09
XP_006064763	folate receptor beta isoform X1	FOLR2	1.47	3.728	4	1	2	1	1	286	33	7.17
XP_006064764	folate receptor beta isoform X2	FOLR2.1	1.47	3.728	4	1	2	1	1	253	29.3	7.64
XP_006064766	folate receptor beta isoform X3	FOLR2.2	1.47	3.728	4	1	2	1	1	249	28.8	7.81
XP_006070551	fructose-bisphosphate aldolase A isoform X1	ALDOA	-2.32	5.086	6	2	5	2	1	416	45.1	8.28
XP_006070553	fructose-bisphosphate aldolase A isoform X2	ALDOA.1	-2.32	5.086	6	2	5	2	1	364	39.4	8.19
XP_006065912	gamma-enolase	ENO2	5.67	28.645	13	3	86	3	1	434	47.2	5.07
XP_025138143	gelsolin isoform X1	GSN	4.49	1.871	1	1	1	1	1	780	85.5	6.32
XP_025138144	gelsolin isoform X2	GSN.2	4.49	1.871	1	1	1	1	1	742	81.9	5.78
XP_025138145	gelsolin isoform X3	GSN.1	4.49	1.871	1	1	1	1	1	731	80.7	5.77
XP_025134134	glia-derived nexin	SERPINE2	0.79	7.674	9	2	3	2	1	397	43.8	9.52
XP_006044440	GLIPR1-like protein 1 isoform X1	GLIPR1L1.1	3.09	11.229	15	4	29	4	1	241	27.2	8.66
XP_025140225	GLIPR1-like protein 1 isoform X2	GLIPR1L1	3.09	11.229	18	4	29	4	1	197	22.6	9.25
XP_025124812	glucose-6-phosphate isomerase	GPI	5.2	13.153	6	2	5	2	1	557	62.9	7.71
XP_006065862	glyceraldehyde-3-phosphate dehydrogenase	GAPDH	-1.02	5.855	5	1	3	1	1	333	35.9	8.35
XP_006068868	glyceraldehyde-3-phosphate dehydrogenase, testis-specific	GAPDHS	-2.83	31.325	26	6	12	6	1	401	43.9	8.44
XP_006041955	heat shock 70 kDa protein 1A	LOC102409533	1.48	15.702	8	5	19	3	1	641	70.2	5.92
XP_006041952	heat shock 70 kDa protein 1-like	HSPA1L	0.22	19.389	11	7	25	4	1	641	70.3	6.2
XP_006041196	heat shock 70 kDa protein 6	HSPA6	-1.22	1.835	1	1	5	0	2	643	70.9	6.1
XP_006072590	heat shock cognate 71 kDa protein	HSPA8	-1.22	17.04	6	3	17	1	1	650	71.2	5.52
XP_025120572	heat shock cognate 71 kDa protein-like	LOC102411924	-1.22	1.835	2	1	5	0	2	323	35.8	6.55
XP_006057191	heat shock protein beta-1	HSPB1	4.86	3.425	8	1	4	1	1	201	22.4	6.4
XP_025135916	heat shock protein beta-9	HSPB9	4.91	7.9	21	3	11	3	1	157	16.9	8.21
XP_025127285	heat shock protein HSP 90-alpha	HSP90AA1	2.96	18.155	7	3	14	2	1	733	84.7	5.01
XP_006072201	heat shock-related 70 kDa protein 2	HSPA2	-0.67	37.2	16	9	36	6	1	636	69.8	5.67
XP_006042170	hemopexin	HPX	5.09	2.529	3	1	2	1	1	459	52	7.28
XP_025148663	heterogeneous nuclear ribonucleoprotein A/B isoform X1	HNRNPAB	2.05	8.906	6	2	4	2	1	332	36	6.95
XP_025148665	heterogeneous nuclear ribonucleoprotein A/B isoform X2	HNRNPAB.1	2.05	8.906	7	2	4	2	1	285	30.6	7.91
XP_006059447	heterogeneous nuclear ribonucleoprotein A0	HNRNPA0	5.67	38.082	19	4	7	4	1	303	30.7	9.31
XP_006063771	heterogeneous nuclear ribonucleoprotein A1 isoform X1	HNRNPA1	5.1	64.201	29	8	33	8	1	373	38.8	9.13
XP_025140097	heterogeneous nuclear ribonucleoprotein A1 isoform X2	HNRNPA1.1	5.1	64.201	34	8	33	8	1	320	34.2	9.23
XP_025129581	heterogeneous nuclear ribonucleoprotein A1-like	LOC102396919	5.1	64.201	34	8	33	8	1	320	34.1	9.33
XP_025141272	heterogeneous nuclear ribonucleoprotein A1-like	LOC102389116	5.1	30.054	27	5	18	5	1	319	34.2	9.23
XP_025130162	heterogeneous nuclear ribonucleoprotein A3 isoform X1	HNRNPA3.1	4.43	15.143	17	3	5	3	1	379	39.6	9.01
XP_025130169	heterogeneous nuclear ribonucleoprotein A3 isoform X2	HNRNPA3	4.43	15.143	18	3	5	3	1	357	37.1	8.31
XP_025130174	heterogeneous nuclear ribonucleoprotein A3 isoform X3	HNRNPA3.2	4.43	15.143	20	3	5	3	1	313	32	9.13
XP_025126064	heterogeneous nuclear ribonucleoprotein C-like	LOC102408709	3.68	10.404	12	2	6	2	1	293	32.3	5.02
XP_025145602	heterogeneous nuclear ribonucleoprotein D-like isoform X1	HNRNPDL.1	2.79	3.103	5	1	1	1	1	420	46.4	9.57
XP_025145603	heterogeneous nuclear ribonucleoprotein D-like isoform X2	HNRNPDL.5	2.79	3.103	5	1	1	1	1	405	44.8	9.69
XP_025145604	heterogeneous nuclear ribonucleoprotein D-like isoform X3	HNRNPDL.6	2.79	3.103	5	1	1	1	1	400	44	9.77
XP_025145605	heterogeneous nuclear ribonucleoprotein D-like isoform X4	HNRNPDL.7	2.79	3.103	5	1	1	1	1	395	43.7	9.88
XP_025145609	heterogeneous nuclear ribonucleoprotein D-like isoform X6	HNRNPDL.4	2.79	3.103	6	1	1	1	1	363	40	9.96
XP_025145611	heterogeneous nuclear ribonucleoprotein D-like isoform X7	HNRNPDL	2.79	3.103	6	1	1	1	1	348	38.5	9.76
XP_025145612	heterogeneous nuclear ribonucleoprotein D-like isoform X8	HNRNPDL.2	2.79	3.103	6	1	1	1	1	343	37.7	9.85
XP_025145613	heterogeneous nuclear ribonucleoprotein D-like isoform X9	HNRNPDL.3	2.79	3.103	6	1	1	1	1	338	37.4	9.96
XP_006050801	heterogeneous nuclear ribonucleoprotein F	HNRNPF	5.98	7.059	4	1	2	1	1	414	45.7	5.49
XP_025149729	heterogeneous nuclear ribonucleoprotein H isoform X1	HNRNPH1.4	3.26	13.678	9	2	5	2	1	482	52.6	7.17
XP_006058920	heterogeneous nuclear ribonucleoprotein H isoform X2	HNRNPH1.2	2.85	17.005	12	3	8	3	1	472	51.2	6.8
XP_025149730	heterogeneous nuclear ribonucleoprotein H isoform X3	HNRNPH1.8	3.26	13.678	9	2	5	2	1	472	51.6	7.17
XP_025149731	heterogeneous nuclear ribonucleoprotein H isoform X4	HNRNPH1.7	3.26	13.678	9	2	5	2	1	462	50.4	7.33
XP_025149732	heterogeneous nuclear ribonucleoprotein H isoform X5	HNRNPH1.3	3.26	13.678	9	2	5	2	1	459	50.6	6.6
XP_006058922	heterogeneous nuclear ribonucleoprotein H isoform X6	HNRNPH1.1	2.85	17.005	12	3	8	3	1	449	49.2	6.3
XP_025149733	heterogeneous nuclear ribonucleoprotein H isoform X7	HNRNPH1.6	3.26	13.678	9	2	5	2	1	449	49.6	6.6
XP_025149735	heterogeneous nuclear ribonucleoprotein H isoform X8	HNRNPH1.5	3.26	13.678	9	2	5	2	1	439	48.4	6.67
XP_025149736	heterogeneous nuclear ribonucleoprotein H isoform X9	HNRNPH1	2.85	17.005	13	3	8	3	1	429	47.1	6.34
XP_006051911	heterogeneous nuclear ribonucleoprotein H2	HNRNPH2	3.26	13.678	9	2	5	2	1	449	49.2	6.3
XP_006059160	heterogeneous nuclear ribonucleoprotein K isoform X1	HNRNPK	6.64	31.337	9	3	20	3	1	464	51	5.26
XP_006059161	heterogeneous nuclear ribonucleoprotein K isoform X2	HNRNPK.1	6.64	31.337	9	3	20	3	1	463	50.9	5.47
XP_025137738	heterogeneous nuclear ribonucleoprotein K isoform X3	HNRNPK.2	6.64	31.337	9	3	20	3	1	459	50.4	5.33
XP_006059162	heterogeneous nuclear ribonucleoprotein K isoform X4	HNRNPK.3	6.64	31.337	9	3	20	3	1	440	48.5	5.45
XP_025137739	heterogeneous nuclear ribonucleoprotein K isoform X5	HNRNPK.4	6.64	31.337	9	3	20	3	1	439	48.5	5.78
XP_025124865	heterogeneous nuclear ribonucleoprotein L isoform X1	HNRNPL	0.55	12.094	5	1	2	1	1	588	64	8.22
XP_025124866	heterogeneous nuclear ribonucleoprotein L isoform X2	HNRNPL.1	0.55	12.094	6	1	2	1	1	456	50.5	7.5
XP_025149145	heterogeneous nuclear ribonucleoprotein M isoform X1	HNRNPM.8	5.61	17.466	5	3	6	3	1	755	80.2	8.7
XP_006046774	heterogeneous nuclear ribonucleoprotein M isoform X10	HNRNPM.4	5.61	17.466	6	3	6	3	1	691	73.5	8.82
XP_025149153	heterogeneous nuclear ribonucleoprotein M isoform X11	HNRNPM.3	5.61	17.466	6	3	6	3	1	681	72.9	8.84
XP_025149154	heterogeneous nuclear ribonucleoprotein M isoform X12	HNRNPM.10	5.61	17.466	6	3	6	3	1	663	71	8.72
XP_025149146	heterogeneous nuclear ribonucleoprotein M isoform X2	HNRNPM	5.61	17.466	6	3	6	3	1	740	78.7	8.7
XP_006046772	heterogeneous nuclear ribonucleoprotein M isoform X3	HNRNPM.1	5.61	17.466	6	3	6	3	1	730	77.4	8.7
XP_025149147	heterogeneous nuclear ribonucleoprotein M isoform X4	HNRNPM.5	5.61	17.466	6	3	6	3	1	716	76.3	8.82
XP_006046773	heterogeneous nuclear ribonucleoprotein M isoform X5	HNRNPM.2	5.61	17.466	6	3	6	3	1	715	76	8.7
XP_025149149	heterogeneous nuclear ribonucleoprotein M isoform X6	HNRNPM.6	5.61	17.466	6	3	6	3	1	712	75.6	8.57
XP_025149150	heterogeneous nuclear ribonucleoprotein M isoform X7	HNRNPM.11	5.61	17.466	6	3	6	3	1	706	75.6	8.84
XP_025149151	heterogeneous nuclear ribonucleoprotein M isoform X8	HNRNPM.7	5.61	17.466	6	3	6	3	1	705	74.6	8.19
XP_025149152	heterogeneous nuclear ribonucleoprotein M isoform X9	HNRNPM.9	5.61	17.466	6	3	6	3	1	697	74.1	8.59
XP_025150357	heterogeneous nuclear ribonucleoprotein Q isoform X1	SYNCRIP	3.86	4.682	2	1	2	1	1	562	62.6	7.56
XP_025150358	heterogeneous nuclear ribonucleoprotein Q isoform X2	SYNCRIP.2	3.86	4.682	2	1	2	1	1	561	62.5	7.56
XP_006057637	heterogeneous nuclear ribonucleoprotein Q isoform X3	SYNCRIP.1	3.86	4.682	2	1	2	1	1	623	69.6	8.59
XP_006057638	heterogeneous nuclear ribonucleoprotein Q isoform X4	SYNCRIP.3	3.86	4.682	2	1	2	1	1	525	59	9.36
XP_025150359	heterogeneous nuclear ribonucleoprotein Q isoform X5	SYNCRIP.4	3.86	4.682	3	1	2	1	1	509	56.6	8.68
XP_006063589	heterogeneous nuclear ribonucleoprotein U isoform X1	HNRNPU	3.44	16.765	4	2	4	2	1	825	90.4	6
XP_006063591	heterogeneous nuclear ribonucleoprotein U isoform X2	HNRNPU.1	3.44	16.765	4	2	4	2	1	806	88.8	5.78
XP_006063934	heterogeneous nuclear ribonucleoproteins A2/B1	LOC102403366	4.09	4.027	5	1	1	1	1	372	40.4	9.31
XP_006045808	heterogeneous nuclear ribonucleoproteins A2/B1 isoform X1	LOC102389038.1	6.64	82.386	25	6	172	6	1	341	36	8.65
XP_025147060	heterogeneous nuclear ribonucleoproteins A2/B1 isoform X1	HNRNPA2B1.2	6.64	82.386	24	6	172	6	1	353	37.4	8.95
XP_006045809	heterogeneous nuclear ribonucleoproteins A2/B1 isoform X2	LOC102389038	6.64	82.386	28	6	172	6	1	301	32.5	8.72
XP_025147061	heterogeneous nuclear ribonucleoproteins A2/B1 isoform X3	HNRNPA2B1	6.64	82.386	27	6	172	6	1	313	33.9	9.03
XP_025147062	heterogeneous nuclear ribonucleoproteins A2/B1 isoform X4	HNRNPA2B1.1	6.64	82.386	29	6	172	6	1	292	31.9	9.19
XP_025151817	heterogeneous nuclear ribonucleoproteins C1/C2 isoform X1	HNRNPC.2	4.03	14.228	15	3	10	3	1	307	33.7	5.08
XP_025151822	heterogeneous nuclear ribonucleoproteins C1/C2 isoform X2	HNRNPC.3	4.03	14.228	15	3	10	3	1	306	33.6	5.08
XP_025151823	heterogeneous nuclear ribonucleoproteins C1/C2 isoform X3	HNRNPC.1	3.33	21.805	22	4	13	4	1	294	32.4	5.08
XP_025151824	heterogeneous nuclear ribonucleoproteins C1/C2 isoform X4	HNRNPC	3.33	21.805	22	4	13	4	1	293	32.3	5.08
XP_006060379	hexokinase-1 isoform X1	HK1	0.52	7.314	2	1	1	1	1	917	102.2	6.71
XP_025140432	hexokinase-1 isoform X2	HK1.1	0.52	7.314	2	1	1	1	1	921	102.5	6.64
XP_006048090	histone H1.1	LOC102390920	6.64	35.745	18	4	588	4	1	215	21.7	10.86
XP_006048088	histone H1.2	LOC102390145	6.64	42.63	24	5	694	5	1	213	21.4	11
XP_006048076	histone H1.3	LOC102412313	6.64	42.63	23	5	694	5	1	221	22.2	10.96
XP_006048065	histone H1.4	LOC102408803	6.64	42.63	23	5	694	5	1	219	21.9	11.03
XP_006048070	histone H1.4-like	LOC102410341	6.64	35.745	18	4	588	4	1	210	21.3	10.9
XP_025151801	histone H1.5	LOC102410659	6.64	4.955	6	1	70	1	1	226	22.7	10.92
XP_025151956	histone H2A type 1	LOC112587908	4.52	54.452	35	6	267	3	1	130	14.1	10.9
XP_006048086	histone H2A type 1-B/E	LOC102389168	3.52	32.186	35	5	254	2	1	130	14.1	11.05
XP_006048081	histone H2A type 1-C	LOC102414630	3.52	32.186	35	5	254	2	1	130	14.1	11.05
XP_025151913	histone H2A type 1-D	LOC112587905	4.52	54.452	35	6	267	3	1	130	14.1	10.9
XP_025152105	histone H2A type 1-D-like	LOC102389822	3.89	21.432	29	3	250	0	2	121	13.1	11.02
XP_006048063	histone H2A type 1-H	LOC102408136	4.52	54.452	36	6	267	3	1	128	13.9	10.89
XP_025151963	histone H2A type 1-J	LOC102400351	4.52	54.452	36	6	267	3	1	128	13.9	10.89
XP_006049262	histone H2A type 2-A	LOC102413094	4.52	62.625	58	7	268	4	1	130	14.1	10.9
XP_006049267	histone H2A type 2-B	LOC102415072	5.06	8.572	30	2	108	1	1	130	14	10.89
XP_006049266	histone H2A type 2-C	LOC102414738	4.52	62.625	58	7	268	4	1	129	14	10.9
XP_006063276	histone H2A type 3	LOC102404666	3.52	32.186	33	5	254	2	1	140	15.3	10.56
XP_006055195	histone H2A.J	LOC102402131	4.52	54.452	36	6	267	3	1	129	14	10.9
XP_025147126	histone H2A.V	LOC102395706	6.17	31.645	45	5	254	3	1	128	13.5	10.58
XP_025146175	histone H2A.Z	LOC102409148	6.17	31.645	45	5	254	3	1	128	13.5	10.58
XP_006078744	histone H2AX	LOC102392520	4.93	17.69	32	4	241	2	1	143	15.1	10.74
XP_006048078	histone H2B type 1	LOC102413318	6.64	37.157	33	5	345	5	1	126	13.9	10.32
XP_006051280	histone H2B type 1-A	LOC102394425	5.19	13.263	21	3	274	3	1	127	14.2	10.24
XP_006048087	histone H2B type 1-B	LOC102389499	6.64	37.157	33	5	345	5	1	126	13.9	10.32
XP_025120517	histone H2B type 1-F/J/L-like	LOC102404200	3.57	1.824	8	1	21	1	1	93	10.4	10.18
XP_006048062	histone H2B type 1-J-like	LOC102407809	6.64	37.157	33	5	345	5	1	126	13.9	10.32
XP_025152033	histone H2B type 1-K	LOC102408478	6.64	37.157	33	5	345	5	1	126	13.9	10.32
XP_025145140	histone H2B type 1-like	LOC102392042	6.47	5.318	14	2	147	2	1	116	12.8	10.36
XP_025127773	histone H2B type 1-like	LOC102408153	6.47	5.318	13	2	147	2	1	126	13.8	10.11
XP_025136898	histone H2B type 1-like	LOC112583797	6.47	5.318	13	2	147	2	1	126	13.8	10.07
XP_006048073	histone H2B type 1-like	LOC102411322	6.64	37.157	33	5	345	5	1	126	13.9	10.32
XP_025152060	histone H2B type 1-like	LOC102410005	6.64	37.157	33	5	345	5	1	126	13.9	10.32
XP_025149113	histone H2B type 1-like	LOC102410329	6.64	35.334	28	4	324	4	1	125	13.9	10.21
XP_006076308	histone H2B type 1-like	LOC102412582	6.64	27.445	25	3	217	3	1	126	13.9	10.1
XP_006042841	histone H2B type 1-like	LOC102398832	6.64	27.445	25	3	217	3	1	126	13.7	10.17
XP_006066860	histone H2B type 1-like	LOC102392466	6.64	27.445	25	3	217	3	1	126	14	10.37
XP_025146655	histone H2B type 1-like isoform X1	LOC102413516	6.64	11.44	15	2	253	2	1	136	14.9	9.83
XP_006065981	histone H2B type 1-like isoform X2	LOC102413516.1	6.64	11.44	15	2	253	2	1	133	14.8	10.1
XP_025150009	histone H2B type 1-L-like	LOC112587290	5.19	13.263	17	3	274	3	1	158	18.2	10.23
XP_025135696	histone H2B type 1-L-like	LOC112583653	6.64	31.839	21	3	198	3	1	126	13.9	10.13
XP_025152011	histone H2B type 1-M	LOC102409122	6.64	37.157	33	5	345	5	1	126	13.9	10.32
XP_006045701	histone H2B type 1-N	LOC102409993	6.64	37.157	33	5	345	5	1	126	13.9	10.32
XP_025128907	histone H2B type 1-N-like	LOC112581359	4.38	9.769	14	2	148	2	1	125	13.9	10.24
XP_025134943	histone H2B type 1-N-like	LOC102400687	5.19	7.945	7	1	127	1	1	147	15.8	9.99
XP_006049265	histone H2B type 2-E	LOC102414399	6.64	37.157	33	5	345	5	1	126	13.9	10.32
XP_006063813	histone H2B type 2-E-like	LOC102393518	5.19	7.945	7	1	127	1	1	166	18.2	9.73
XP_025143733	histone H2B type 2-E-like	LOC102413428	6.64	37.157	33	5	345	5	1	126	13.9	10.32
XP_006046626	histone H2B type 2-E-like	LOC102408128	6.64	37.157	29	5	345	5	1	145	16	9.94
XP_006079668	histone H2B type 2-E-like	LOC102395743	6.64	11.44	16	2	253	2	1	126	13.9	10.13
XP_006049257	histone H2B type 2-F	LOC102411450	6.64	37.157	33	5	345	5	1	126	13.9	10.32
XP_006063275	histone H2B type 3-B	LOC102404341	6.64	35.334	28	4	324	4	1	126	13.9	10.32
XP_006077823	histone H2B type F-S-like	LOC102389641	5.19	7.945	7	1	127	1	1	161	17.2	9.73
XP_025149877	histone H3.1	LOC102412183	6.64	99.831	29	5	459	2	1	191	21.4	10.73
XP_025152210	histone H3.1-like	LOC102409669	4.22	50.563	37	10	588	7	1	218	24.4	11.11
XP_025151884	histone H3.1-like	LOC102394835	5.15	4.4	10	2	314	0	5	132	14.9	10.7
XP_006046136	histone H3.3	LOC102406199	6.64	51.797	40	5	422	2	1	136	15.3	11.27
XP_006062028	histone H3.3	LOC102414136	6.64	4.582	11	2	198	0	4	136	15.3	11.12
XP_025121222	histone H3.3C	LOC102402179	6.64	51.797	40	5	422	2	1	136	15.4	11.49
XP_006062480	histone H3.3C-like	LOC102395983	6.64	4.582	11	2	198	0	4	136	15.7	11.34
XP_025132316	histone H3.3-like	LOC112582190	6.64	94.203	34	3	179	2	1	115	13.2	9.8
XP_025129158	histone H3.3-like	LOC102389804	6.64	48.892	34	4	340	2	1	136	15.3	10.99
XP_025147992	histone H3.3-like	LOC102410792	6.64	47.215	29	3	224	2	1	136	15.2	11.14
XP_025126790	histone H3.3-like	LOC112580793	5.15	4.4	10	2	314	0	5	136	15.4	11.12
XP_006080628	histone H3.3-like	LOC102399019	6.64	7.305	16	3	396	0	4	136	15.2	11.14
XP_006054995	histone H3.3-like	LOC102396450	6.64	5.628	12	2	280	0	4	136	15.2	10.84
XP_025143734	histone H4	LOC102412113	1.35	43.258	56	7	192	7	1	103	11.4	11.36
XP_006074042	histone H4-like	LOC102406674	1.89	32.353	44	6	187	6	1	103	11.3	11.22
XP_006067791	histone H4-like	LOC102414837	0.04	4.78	10	1	29	1	1	103	11.2	10.86
XP_025152151	histone H4-like	LOC102392571	2.33	15.207	22	2	75	2	1	103	11.3	11.36
XP_025124939	hormone-sensitive lipase isoform X1	LIPE	1.06	3.962	2	1	2	1	1	1042	114.5	6.98
XP_006041291	hormone-sensitive lipase isoform X2	LIPE.2	1.06	3.962	2	1	2	1	1	802	88	8.05
XP_006041293	hormone-sensitive lipase isoform X3	LIPE.1	1.06	3.962	3	1	2	1	1	756	82.5	6.92
XP_006060645	hyaluronidase PH-20 isoform X1	LOC102411950	-2.07	53.523	22	12	46	12	1	552	62.1	8.41
XP_025147242	hyaluronidase PH-20 isoform X2	LOC102411950.1	-2.07	53.523	24	12	46	12	1	522	59.1	8.54
XP_006069382	immunoglobulin J chain	JCHAIN	2.72	6.091	9	1	5	1	1	158	17.8	5.22
XP_025124026	immunoglobulin lambda-like polypeptide 1	IGLL1	3.58	8.572	5	1	3	1	1	344	36.9	9.96
XP_006076998	immunoglobulin superfamily member 5 isoform X1	IGSF5.1	5.07	3.165	3	1	2	1	1	370	39.7	6.23
XP_006076999	immunoglobulin superfamily member 5 isoform X2	IGSF5	5.07	3.165	3	1	2	1	1	324	34.7	6.43
XP_025136030	importin subunit beta-1	KPNB1	2.73	4.82	1	1	1	1	1	876	97.2	4.78
XP_025137332	insulin-like peptide INSL6	LOC102413732	-2.5	3.821	10	2	2	2	1	205	24	9.07
XP_006043253	isoaspartyl peptidase/L-asparaginase	ASRGL1	0.98	24.173	28	4	9	4	1	308	32	7.4
XP_006041198	izumo sperm-egg fusion protein 4 isoform X1	IZUMO4	4.36	2.337	4	1	3	1	1	213	24.4	6.71
XP_006041197	izumo sperm-egg fusion protein 4 isoform X2	IZUMO4.1	4.36	2.337	4	1	3	1	1	207	23.7	6.71
XP_006068696	keratin, type I cytoskeletal 24 isoform X1	KRT24	-0.08	3.488	4	1	1	1	1	525	54.9	4.89
XP_025135949	keratin, type I cytoskeletal 24 isoform X2	KRT24.1	-0.08	3.488	4	1	1	1	1	439	47.9	4.92
XP_006046659	keratin, type II cytoskeletal 1	KRT1	2.98	4.799	3	2	2	2	1	614	63.6	8.46
XP_006046663	keratin, type II cytoskeletal 3	KRT3	3.81	4.9	2	1	2	1	1	629	64.2	7.74
XP_006046651	keratin, type II cytoskeletal 5	KRT5	3.52	9.058	4	2	5	2	1	595	62.5	7.81
XP_006058536	keratin, type II cytoskeletal 7	KRT7	3.81	4.9	3	1	2	1	1	466	51.7	6.71
XP_025119156	kunitz-type protease inhibitor 4	SPINT4	4.39	7.238	26	2	3	2	1	106	12.1	8.37
NP_001277789	lactotransferrin precursor	LTF	0.12	16.868	6	3	6	3	1	708	77.6	7.99
XP_025147624	late histone H2B.L4-like	LOC112586636	6.64	3.494	7	1	126	1	1	122	13.6	10.54
XP_025142068	leucine zipper protein 2 isoform X1	LUZP2	-0.07	83.765	40	16	89	16	1	350	40.1	6.37
XP_025142069	leucine zipper protein 2 isoform X2	LUZP2.1	-0.07	83.765	44	16	89	16	1	318	36.5	8.02
XP_006064816	leucine zipper protein 2 isoform X3	LUZP2.2	-1.1	56.767	40	12	80	12	1	264	30.1	5.62
XP_025135706	leucine-rich repeat-containing protein 37A3 isoform X1	LOC102416251	3.93	34.44	3	7	41	7	1	2553	280.5	4.93
XP_025135707	leucine-rich repeat-containing protein 37A3 isoform X2	LOC102416251.1	3.93	34.44	4	7	41	7	1	2478	271.8	4.91
XP_025118016	lipocalin-1 isoform X1	LCN1.1	3.17	7.799	13	2	4	2	1	178	19.6	4.73
XP_025118018	lipocalin-1 isoform X2	LCN1	4.57	15.076	25	3	9	3	1	173	19.1	4.7
XP_006067703	L-lactate dehydrogenase B chain isoform X1	LDHB	6.21	9.653	6	1	8	1	1	334	36.6	6.44
XP_025138840	LOW QUALITY PROTEIN: A-kinase anchor protein 3	AKAP3	2.29	13.465	5	3	11	3	1	852	94	6.92
XP_006077629	LOW QUALITY PROTEIN: axonemal dynein light intermediate polypeptide 1	DNALI1	3.21	3.54	5	1	1	1	1	280	31.9	8.68
XP_025129709	LOW QUALITY PROTEIN: deleted in malignant brain tumors 1 protein	DMBT1	0.81	20.328	16	3	10	3	1	3206	344.2	5.22
XP_025123308	LOW QUALITY PROTEIN: disintegrin and metalloproteinase domain-containing protein 1a-like	LOC112579917	1.63	9.317	3	2	6	2	1	928	101.1	5.34
XP_025133994	LOW QUALITY PROTEIN: disintegrin and metalloproteinase domain-containing protein 2	ADAM2	1.09	2.415	4	1	1	1	1	745	83	5.44
XP_025134019	LOW QUALITY PROTEIN: disintegrin and metalloproteinase domain-containing protein 32	ADAM32	-1.85	17.898	7	4	11	4	1	746	82.4	5.29
XP_006054002	LOW QUALITY PROTEIN: elongation factor 1-alpha, oocyte form	LOC102409600	1.62	7.939	5	2	32	2	1	461	50.1	9.33
XP_025128865	LOW QUALITY PROTEIN: epidermal growth factor receptor	EGFR	5.07	3.815	1	1	3	1	1	1240	137.2	7.44
XP_006061855	LOW QUALITY PROTEIN: fatty acid synthase	LOC102409414	2.96	8.82	1	1	1	1	1	2515	274.4	6.33
XP_025138182	LOW QUALITY PROTEIN: fatty acid synthase-like, partial	LOC112584007	2.96	8.82	2	1	1	1	1	1013	111	6.96
XP_025129505	LOW QUALITY PROTEIN: fibrous sheath-interacting protein 2	FSIP2	3.26	3.95	0	1	1	1	1	6939	781.4	6.64
XP_006045325	LOW QUALITY PROTEIN: galactokinase	GALK1	2.38	3.021	3	1	1	1	1	392	42.1	5.91
XP_006048079	LOW QUALITY PROTEIN: histone H3.1	LOC102413645	6.64	99.831	40	5	459	2	1	136	15.4	11.12
XP_025143731	LOW QUALITY PROTEIN: histone H3-like	LOC102414060	6.64	96.04	40	5	482	2	1	136	15.4	11.27
XP_025149641	LOW QUALITY PROTEIN: IQ domain-containing protein N	IQCN	3.69	83.042	8	16	47	16	1	3657	377.3	9.33
XP_025140015	LOW QUALITY PROTEIN: keratin, type II cytoskeletal 75	LOC102416114	3.81	4.9	2	1	2	1	1	594	64.3	8.32
XP_006073420	LOW QUALITY PROTEIN: lamin-B1	LMNB1	-0.84	4.823	3	1	4	1	1	586	66.4	5.14
XP_006070216	LOW QUALITY PROTEIN: luc7-like protein 3	LUC7L3	-0.86	2.52	3	1	1	1	1	489	58.2	9.89
XP_025145318	LOW QUALITY PROTEIN: mucin-2	LOC102400605	5.77	14.204	3	5	22	5	1	2782	287.2	5.39
XP_025152321	LOW QUALITY PROTEIN: seminal ribonuclease-like	LOC102390014	-4.69	26.785	19	2	37	1	1	151	16.7	9.39
XP_025123146	LOW QUALITY PROTEIN: splicing factor 3A subunit 1	SF3A1	1.11	4.42	3	1	1	1	1	793	88.7	5.22
XP_006076181	LOW QUALITY PROTEIN: tumor necrosis factor receptor superfamily member 21	TNFRSF21	2.95	1.981	2	1	1	1	1	652	71.3	7.83
XP_006069410	LOW QUALITY PROTEIN: vitamin D-binding protein	GC	-3.29	145.166	41	17	73	17	1	474	53.3	5.71
XP_006060063	lupus La protein	SSB	4.89	5.344	3	1	2	1	1	405	46.6	8.29
XP_025120043	lysozyme-like protein 1	LOC102401702	-0.98	8.808	23	2	5	2	1	148	16.8	7.83
NP_001277777	lysozyme-like protein 4 precursor	LYZL4	-0.93	8.177	14	1	2	1	1	145	16.3	8.12
XP_006047820	major prion protein-like	PRNP	1.16	5.733	5	1	3	1	1	264	28.7	9.45
NP_001277813	malate dehydrogenase, mitochondrial	MDH2	2.71	14.586	17	3	6	3	1	338	35.7	8.56
XP_006043252	mammaglobin-A	LOC102396096	6.01	38.052	34	6	123	6	1	94	10.8	4.67
XP_025148402	matrin-3 isoform X1	MATR3	3.77	46.413	12	4	18	4	1	897	100	6.04
XP_025148405	matrin-3 isoform X2	MATR3.2	3.77	46.413	13	4	18	4	1	849	94.6	6.25
XP_025148406	matrin-3 isoform X3	MATR3.1	3.77	46.413	13	4	18	4	1	844	93.8	5.59
XP_006054278	melanotransferrin isoform X1	MELTF	3.81	12.786	4	3	17	3	1	746	81.4	6.13
XP_006054279	melanotransferrin isoform X2	MELTF.1	3.81	12.786	4	3	17	3	1	745	81.3	6.13
XP_006042440	midkine isoform X1	MDK.1	6.64	4.839	6	1	5	1	1	174	18.9	9.8
XP_025121917	midkine isoform X2	MDK	6.64	4.839	6	1	5	1	1	165	17.9	9.76
XP_006042442	midkine isoform X3	MDK.2	6.64	4.839	7	1	5	1	1	152	16.6	9.82
XP_006057549	mitochondria-eating protein isoform X1	SPATA18	0.6	22.874	7	5	10	5	1	549	62	8.82
XP_025145834	mitochondria-eating protein isoform X2	SPATA18.1	0.6	22.874	8	5	10	5	1	517	58.4	9
XP_006067603	mitochondrial import receptor subunit TOM40 homolog isoform X1	TOMM40.1	-0.17	3.387	9	1	1	1	1	361	37.7	7.25
XP_006067604	mitochondrial import receptor subunit TOM40 homolog isoform X2	TOMM40	-0.17	3.387	10	1	1	1	1	347	36.3	7.03
XP_025143006	mucin-6	MUC6	3.87	3.905	0	1	11	1	1	2841	305.6	6.93
XP_025129304	myosin regulatory light chain 12B	LOC102400287	3.55	2.363	12	1	1	1	1	171	19.7	4.84
XP_006071913	myosin regulatory light polypeptide 9 isoform X1	LOC102400830	3.55	2.363	11	1	1	1	1	178	20.5	4.75
XP_006071914	myosin regulatory light polypeptide 9 isoform X2	LOC102400830.1	3.55	2.363	12	1	1	1	1	172	19.9	4.81
XP_025136376	myosin-10 isoform X1	MYH10.1	0.66	11.387	1	1	3	1	1	2007	232.5	5.55
XP_025136380	myosin-10 isoform X2	MYH10.3	0.66	11.387	1	1	3	1	1	1997	231.4	5.53
XP_025136381	myosin-10 isoform X3	MYH10.2	0.66	11.387	1	1	3	1	1	1986	230.1	5.57
XP_025136382	myosin-10 isoform X4	MYH10	0.66	11.387	1	1	3	1	1	1976	229	5.54
XP_025139302	myosin-9	MYH9	-0.43	9.324	3	2	2	2	1	1965	227.1	5.6
XP_006073746	non-histone chromosomal protein HMG-17	LOC102389195	3.88	4.168	17	1	65	1	1	90	9.4	9.99
XP_006079491	non-POU domain-containing octamer-binding protein	NONO	0.47	18.737	14	3	3	3	1	470	54.1	8.95
XP_006053930	NPC intracellular cholesterol transporter 2	NPC2	-2.01	33.894	34	4	20	4	1	149	16.6	7.99
XP_025119523	NSFL1 cofactor p47 isoform X1	NSFL1C	2.62	6.143	4	1	6	1	1	381	41.9	5.26
XP_006049049	NSFL1 cofactor p47 isoform X2	NSFL1C.2	2.62	6.143	4	1	6	1	1	372	40.9	5.25
XP_006049050	NSFL1 cofactor p47 isoform X3	NSFL1C.1	2.62	6.143	4	1	6	1	1	370	40.6	5.19
XP_025144744	nuclease-sensitive element-binding protein 1 isoform X1	YBX1	5.48	7.946	11	1	4	1	1	324	35.9	9.88
XP_006050985	nucleobindin-1	NUCB1	4.92	9.766	5	2	9	2	1	457	53.2	5.14
XP_006041251	nucleobindin-2	NUCB2	5.37	18.193	4	2	9	2	1	415	49.2	5.21
XP_006060385	nucleolar RNA helicase 2	DDX21	6.64	21.481	3	1	6	1	1	784	87.2	9.22
XP_006041928	nucleolin	NCL	6.64	35.862	6	2	23	2	1	720	77.8	4.7
XP_025126627	nucleophosmin isoform X1	NPM1.1	4.07	30.3	24	3	12	3	1	294	32.7	4.77
XP_025126628	nucleophosmin isoform X2	NPM1	3.98	17.63	22	2	6	2	1	259	28.5	4.69
XP_006042334	osteopontin	SPP1	4	17.998	19	3	17	3	1	280	31.2	4.67
XP_006065416	outer dense fiber protein 2 isoform X1	ODF2.2	4.94	16.044	4	2	5	2	1	912	105	8.54
XP_025117550	outer dense fiber protein 2 isoform X10	ODF2.13	4.94	16.044	4	2	5	2	1	829	95.8	7.61
XP_025117557	outer dense fiber protein 2 isoform X11	ODF2.7	4.94	16.044	4	2	5	2	1	824	95.3	7.18
XP_025117553	outer dense fiber protein 2 isoform X12	ODF2.3	4.94	16.044	4	2	5	2	1	810	93.3	7.33
XP_025117554	outer dense fiber protein 2 isoform X13	ODF2.11	4.94	16.044	4	2	5	2	1	787	90.6	6.46
XP_025117556	outer dense fiber protein 2 isoform X14	ODF2.1	4.94	16.044	4	2	5	2	1	758	87.1	8.35
XP_006065421	outer dense fiber protein 2 isoform X15	ODF2.9	4.94	16.044	5	2	5	2	1	701	80.7	8.43
XP_006065417	outer dense fiber protein 2 isoform X2	ODF2.12	4.94	16.044	4	2	5	2	1	905	104.3	8.57
XP_006065418	outer dense fiber protein 2 isoform X3	ODF2.6	4.94	16.044	4	2	5	2	1	893	102.9	8.51
XP_025117539	outer dense fiber protein 2 isoform X4	ODF2.4	4.94	16.044	4	2	5	2	1	873	100.6	8.31
XP_025117545	outer dense fiber protein 2 isoform X5	ODF2	4.94	16.044	4	2	5	2	1	868	99.8	7.96
XP_025117546	outer dense fiber protein 2 isoform X6	ODF2.5	4.94	16.044	4	2	5	2	1	868	100	8.05
XP_025117547	outer dense fiber protein 2 isoform X7	ODF2.8	4.94	16.044	4	2	5	2	1	854	98.5	8.27
XP_025117548	outer dense fiber protein 2 isoform X8	ODF2.10	4.94	16.044	4	2	5	2	1	831	95.9	7.46
XP_025117549	outer dense fiber protein 2 isoform X9	ODF2.14	4.94	16.044	4	2	5	2	1	829	95.4	7.47
XP_025142930	outer dense fiber protein 3 isoform X1	ODF3	4.12	8.535	11	2	7	2	1	254	27.6	9.88
XP_025142931	outer dense fiber protein 3 isoform X2	ODF3.1	4.12	8.535	14	2	7	2	1	204	22.4	10.42
XP_006059363	pantetheinase isoform X1	LOC102411389	-0.14	1.867	2	1	2	1	1	514	57.4	5.34
XP_006059364	pantetheinase isoform X2	LOC102411389.6	-0.14	1.867	2	1	2	1	1	510	56.8	5.58
XP_025150305	pantetheinase isoform X3	LOC102411389.1	-0.14	1.867	2	1	2	1	1	501	55.9	5.4
XP_025150307	pantetheinase isoform X4	LOC102411389.2	-0.14	1.867	2	1	2	1	1	499	55.6	5.4
XP_025150308	pantetheinase isoform X5	LOC102411389.3	-0.14	1.867	2	1	2	1	1	457	51.1	5.78
XP_025150309	pantetheinase isoform X6	LOC102411389.4	-0.14	1.867	2	1	2	1	1	402	44.7	5.41
XP_025150310	pantetheinase isoform X7	LOC102411389.5	-0.14	1.867	3	1	2	1	1	271	30.1	6.05
XP_006046752	PC4 and SFRS1-interacting protein isoform X1	PSIP1	0.37	5.447	3	1	1	1	1	530	60.1	9.13
XP_025135821	peptide YY isoform X4	LOC102414386	3.8	6.704	30	2	6	2	1	97	11.1	7.34
XP_006051354	peptidyl-prolyl cis-trans isomerase A isoform X1	PPIA	2.96	11.906	19	2	4	2	1	164	17.9	8.16
XP_006075881	peripherin isoform X1	PRPH	4.13	3.097	2	1	3	1	1	469	53.6	5.35
XP_006075882	peripherin isoform X2	PRPH.1	4.13	3.097	2	1	3	1	1	468	53.5	5.35
NP_001277875	peroxiredoxin-1	PRDX1	6.42	13.48	9	1	9	1	1	199	22.2	8.4
XP_006050953	peroxiredoxin-5, mitochondrial isoform X1	PRDX5.1	-0.63	8.341	19	2	3	2	1	219	23.3	8.07
XP_025134979	phosphatidylethanolamine-binding protein 4 isoform X1	PEBP4.1	-2.05	2.723	9	1	1	1	1	222	25	7.01
XP_025134980	phosphatidylethanolamine-binding protein 4 isoform X2	PEBP4	-2.05	2.723	11	1	1	1	1	189	21.2	6.54
XP_025134981	phosphatidylethanolamine-binding protein 4 isoform X3	PEBP4.2	-2.05	2.723	11	1	1	1	1	184	20.7	5.94
XP_006050775	phosphoglycerate kinase 2	PGK2	1.09	11.636	8	2	3	2	1	417	44.8	8.09
XP_006061228	phosphoglycerate mutase 1	PGAM1	6.13	9.934	5	2	8	2	1	254	28.8	7.18
XP_006074829	phosphoglycerate mutase 2	PGAM2	3.48	22.802	21	5	17	5	1	253	28.7	8.72
XP_006049891	pleiotrophin isoform X1	PTN.1	5.99	2.182	8	1	1	1	1	168	18.9	9.6
XP_006049892	pleiotrophin isoform X2	PTN	5.99	2.182	8	1	1	1	1	167	18.8	9.6
XP_006046140	poly [ADP-ribose] polymerase 1	PARP1	2.94	5.756	3	1	1	1	1	1016	113.3	8.84
XP_006079689	poly(rC)-binding protein 1	PCBP1	4.8	25.554	14	2	13	2	1	356	37.5	7.09
XP_025140047	poly(rC)-binding protein 2 isoform X1	PCBP2.14	5.22	18.574	17	3	19	3	1	471	49.1	7.64
XP_025140058	poly(rC)-binding protein 2 isoform X10	PCBP2.10	5.22	18.574	18	3	19	3	1	440	45.8	8.41
XP_025140059	poly(rC)-binding protein 2 isoform X11	PCBP2.13	5.22	18.574	18	3	19	3	1	436	45.4	8.41
XP_025140061	poly(rC)-binding protein 2 isoform X13	PCBP2.16	5.22	18.574	18	3	19	3	1	426	44.2	8.57
XP_025140064	poly(rC)-binding protein 2 isoform X16	PCBP2.12	5.22	18.574	18	3	19	3	1	422	43.8	8.57
XP_025140067	poly(rC)-binding protein 2 isoform X19	PCBP2.9	4.91	28.959	27	4	24	4	1	366	38.6	6.79
XP_025140068	poly(rC)-binding protein 2 isoform X20	PCBP2.4	4.6	22.865	19	3	23	3	1	365	38.6	6.79
XP_025140069	poly(rC)-binding protein 2 isoform X21	PCBP2.8	4.91	28.959	27	4	24	4	1	362	38.2	6.79
XP_025140070	poly(rC)-binding protein 2 isoform X22	PCBP2.5	4.6	22.865	19	3	23	3	1	361	38.1	6.79
XP_025140071	poly(rC)-binding protein 2 isoform X23	PCBP2.2	4.6	22.865	20	3	23	3	1	353	37.2	7.06
XP_025140072	poly(rC)-binding protein 2 isoform X24	PCBP2.1	4.6	22.865	20	3	23	3	1	349	36.8	7.06
XP_025140073	poly(rC)-binding protein 2 isoform X25	PCBP2.7	4.91	28.959	30	4	24	4	1	335	35.3	8
XP_025140074	poly(rC)-binding protein 2 isoform X26	PCBP2.6	4.91	28.959	30	4	24	4	1	331	34.9	8
XP_025140075	poly(rC)-binding protein 2 isoform X27	PCBP2.3	4.6	22.865	21	3	23	3	1	322	33.9	8.24
XP_025140076	poly(rC)-binding protein 2 isoform X28	PCBP2	4.6	22.865	22	3	23	3	1	318	33.5	8.24
XP_025140049	poly(rC)-binding protein 2 isoform X3	PCBP2.11	5.22	18.574	17	3	19	3	1	467	48.7	7.64
XP_025140054	poly(rC)-binding protein 2 isoform X6	PCBP2.15	5.22	18.574	17	3	19	3	1	457	47.5	7.85
XP_006043871	polymeric immunoglobulin receptor	PIGR	6.3	7.257	2	2	9	2	1	757	82.4	6.15
XP_006079680	prenylcysteine oxidase 1	PCYOX1	1.71	2.481	4	1	1	1	1	521	58.4	6.62
XP_006048448	probable inactive ribonuclease-like protein 12 isoform X1	RNASE12.1	5.6	3.572	5	1	4	1	1	203	23.8	7.46
XP_006048449	probable inactive ribonuclease-like protein 12 isoform X2	RNASE12	5.6	3.572	6	1	4	1	1	169	19.7	8.31
XP_025151782	probable inactive ribonuclease-like protein 12 isoform X3	RNASE12.2	5.6	3.572	7	1	4	1	1	145	16.9	6.65
XP_006062024	prohibitin	PHB	6.64	70.138	33	5	27	5	1	272	29.8	5.76
XP_006075113	proliferation-associated protein 2G4	PA2G4	3.12	3.099	8	1	1	1	1	394	43.8	6.55
XP_006043909	proteasome subunit alpha type-6 isoform X1	PSMA6	6.64	4.835	7	1	1	1	1	246	27.4	6.76
XP_025127318	proteasome subunit alpha type-6 isoform X2	PSMA6.1	6.64	4.835	8	1	1	1	1	227	25.2	6.55
XP_006075088	protein canopy homolog 2	CNPY2	-1.19	2.374	9	1	1	1	1	182	20.7	4.92
XP_006050392	protein CutA isoform X1	CUTA.1	6.18	6.29	9	1	6	1	1	154	16.4	5.48
XP_006050391	protein CutA isoform X2	CUTA	6.18	6.29	8	1	6	1	1	177	18.9	7.97
XP_006073828	protein disulfide-isomerase A6	PDIA6	3.07	6.886	3	1	2	1	1	440	48.1	5.1
XP_006049448	protein FAM161A isoform X1	FAM161A.1	4.41	8.7	3	2	6	2	1	721	83.9	8.82
XP_006049450	protein FAM161A isoform X2	FAM161A	4.41	8.7	3	2	6	2	1	665	77.2	8.19
XP_006044299	protein FAM205C isoform X1	FAM205C	0.21	2.447	2	1	5	1	1	408	45.2	9.57
XP_025137439	protein FAM205C isoform X2	FAM205C.1	0.21	2.447	2	1	5	1	1	407	45	9.61
XP_025137440	protein FAM205C isoform X3	FAM205C.2	0.21	2.447	2	1	5	1	1	405	44.7	9.51
XP_025137441	protein FAM205C isoform X4	FAM205C.3	0.21	2.447	2	1	5	1	1	396	42.9	9.6
XP_006075936	protein FAM71B	FAM71B	2.93	14.553	6	3	8	3	1	587	62.4	9.69
XP_025143669	protein MENT isoform X1	C6H1orf56	4.15	65.099	31	10	79	10	1	349	38	8.13
XP_006058204	protein MENT isoform X2	C6H1orf56.1	4.15	65.099	35	10	79	10	1	308	33.2	7.08
XP_006042242	protein PROCA1 isoform X1	PROCA1.2	-0.56	2.578	5	1	1	1	1	375	42.2	6.67
XP_006042243	protein PROCA1 isoform X2	PROCA1	-0.56	2.578	5	1	1	1	1	350	39.1	7.08
XP_006042244	protein PROCA1 isoform X3	PROCA1.1	-0.56	2.578	5	1	1	1	1	346	39.1	6.89
XP_006041419	pyruvate dehydrogenase E1 component subunit beta, mitochondrial	PDHB	4.09	6.589	5	1	2	1	1	359	39.1	6.65
XP_025151996	pyruvate kinase PKM isoform X1	PKM.2	4.65	21.474	6	2	8	2	1	531	58	7.53
XP_025151997	pyruvate kinase PKM isoform X2	PKM.1	4.65	21.474	7	2	8	2	1	436	47.4	6.3
XP_006056975	pyruvate kinase PKM isoform X3	PKM	4.65	21.474	6	2	8	2	1	531	57.9	7.69
XP_025151998	pyruvate kinase PKM isoform X4	PKM.1	4.65	21.474	6	2	8	2	1	521	56.9	8.1
XP_006046288	ras-related protein Rab-10	RAB10	2.73	2.229	6	1	2	1	1	200	22.5	8.38
XP_006053587	ras-related protein Rab-1A isoform X1	RAB1A	4.4	4.122	8	1	1	1	1	205	22.7	6.21
XP_006053588	ras-related protein Rab-1A isoform X2	RAB1A.1	4.4	4.122	10	1	1	1	1	173	19	7.74
XP_025117032	ras-related protein Rab-1A isoform X3	RAB1A.2	4.4	4.122	11	1	1	1	1	161	17.6	5.6
XP_006056483	ras-related protein Rab-1B	RAB1B	4.77	7.7	8	1	3	1	1	201	22.2	5.73
XP_025151786	ribonuclease 4	LOC102414812	5.41	74.848	54	9	47	9	1	147	16.9	8.85
XP_006062164	ribonuclease 4-like	LOC102405757	5.25	43.061	30	5	20	5	1	132	15.2	9.23
XP_025151789	ribonuclease pancreatic-like	LOC102415699	4.34	39.036	40	4	51	3	1	150	16.5	8.29
XP_025141001	ropporin-1A	ROPN1	3.14	4.045	4	1	8	1	1	212	23.9	5.43
XP_006050097	rRNA 2'-O-methyltransferase fibrillarin	FBL	1.11	5.283	10	1	2	1	1	322	33.9	10.2
XP_006048358	sarcoplasmic/endoplasmic reticulum calcium ATPase 2 isoform X1	ATP2A2	1.89	10.581	2	2	3	2	1	1042	114.7	5.41
XP_006048359	sarcoplasmic/endoplasmic reticulum calcium ATPase 2 isoform X2	ATP2A2.1	1.89	10.581	2	2	3	2	1	997	109.6	5.44
XP_006043251	secretoglobin family 1D member isoform X1	LOC102395773.1	6.2	130.72	68	18	350	18	1	102	11.4	8.72
XP_025142305	secretoglobin family 1D member isoform X2	LOC102395773	6.41	107.072	67	15	275	15	1	101	11.3	8.47
XP_006052462	seminal plasma protein BSP-30 kDa	LOC102403094	2.42	8.969	16	3	4	3	1	183	21.3	6.32
XP_025124131	seminal plasma protein PDC-109	LOC102403740	-3.66	3.808	7	1	8	1	1	138	16.1	6.11
XP_025147470	serine protease 58-like	LOC112586553	-4.06	3.559	3	1	13	1	1	237	26.7	6.27
XP_025145790	serine protease inhibitor Kazal-type 2 isoform X1	LOC102397733.1	0.73	25.491	43	2	14	2	1	84	9.2	6.48
XP_006058422	serine protease inhibitor Kazal-type 2 isoform X1	LOC102396469	5.79	25.433	26	1	15	1	1	85	9.5	6.98
XP_006058426	serine protease inhibitor Kazal-type 2 isoform X2	LOC102397733	0.73	25.491	47	2	14	2	1	76	8.3	7.71
XP_006069470	serine protease inhibitor Kazal-type 5 isoform X1	SPINK5.3	0.73	6.191	1	1	1	1	1	1155	130.9	8.1
XP_006069471	serine protease inhibitor Kazal-type 5 isoform X2	SPINK5.2	0.73	6.191	1	1	1	1	1	1154	130.7	8.07
XP_006069472	serine protease inhibitor Kazal-type 5 isoform X3	SPINK5.1	0.73	6.191	1	1	1	1	1	1125	127.6	8.1
XP_006069473	serine protease inhibitor Kazal-type 5 isoform X4	SPINK5	0.73	6.191	1	1	1	1	1	1085	122.9	8.1
XP_006076299	serine/arginine-rich splicing factor 1	SRSF1	5.59	3.363	8	1	1	1	1	248	27.7	10.36
XP_025135362	serine/arginine-rich splicing factor 2	SRSF2	-0.42	6.636	8	1	2	1	1	221	25.5	11.85
XP_006050467	serine/arginine-rich splicing factor 3	SRSF3	4.25	4.948	13	2	5	2	1	164	19.3	11.65
XP_006071251	serine/arginine-rich splicing factor 7 isoform X1	SRSF7.2	4.13	1.789	6	1	3	1	1	238	27.4	11.84
XP_006071250	serine/arginine-rich splicing factor 7 isoform X2	SRSF7	4.13	1.789	6	1	3	1	1	235	26.9	11.87
XP_006071252	serine/arginine-rich splicing factor 7 isoform X3	SRSF7.1	4.13	1.789	6	1	3	1	1	227	26.2	11.85
XP_025129135	serine/threonine-protein phosphatase 4 regulatory subunit 1 isoform X1	PPP4R1.1	4.5	3.877	2	1	3	1	1	938	104.1	4.75
XP_025129136	serine/threonine-protein phosphatase 4 regulatory subunit 1 isoform X2	PPP4R1.2	4.5	3.877	2	1	3	1	1	937	104	4.75
XP_025129137	serine/threonine-protein phosphatase 4 regulatory subunit 1 isoform X3	PPP4R1.4	4.5	3.877	2	1	3	1	1	937	104	4.75
XP_025129138	serine/threonine-protein phosphatase 4 regulatory subunit 1 isoform X4	PPP4R1	4.5	3.877	2	1	3	1	1	921	102.4	4.79
XP_025129139	serine/threonine-protein phosphatase 4 regulatory subunit 1 isoform X5	PPP4R1.3	4.5	3.877	2	1	3	1	1	895	99.6	4.89
XP_006078312	serine/threonine-protein phosphatase PGAM5, mitochondrial isoform X1	PGAM5	5.22	14.067	10	1	5	1	1	289	32	8.56
XP_006078313	serine/threonine-protein phosphatase PGAM5, mitochondrial isoform X2	PGAM5.1	5.22	14.067	10	1	5	1	1	288	31.8	8.56
XP_006051476	serotransferrin	LOC102402015	1.46	5.133	3	2	3	2	1	704	77.8	7.21
XP_025127227	serpin A3-1 isoform X1	LOC102414740	-1.84	18.995	10	4	20	2	1	471	53	6.54
XP_025127228	serpin A3-1 isoform X2	LOC102414740.1	-1.84	18.995	11	4	20	2	1	412	46.6	6.27
XP_025127225	serpin A3-3-like	LOC102405963	-1.91	10.137	7	3	15	1	1	411	46.3	8.94
XP_025127221	serpin A3-7	LOC112580892	-6.44	8.437	6	3	17	1	1	417	46.9	6.6
XP_025127220	serpin A3-7-like	LOC102409634	-6.44	8.437	6	3	17	1	1	417	47	6.37
XP_025127222	serpin A3-7-like	LOC102410174	-6.44	8.437	6	3	17	1	1	417	46.8	5.81
XP_006047011	serum albumin	ALB	-6.64	1335.26	78	100	11968	100	1	607	69.2	6.25
XP_006076365	sorbitol dehydrogenase isoform X1	SORD.1	1.35	5.68	7	2	2	2	1	356	38.1	7.46
XP_025151301	sorbitol dehydrogenase isoform X2	SORD	1.35	5.68	8	2	2	2	1	315	33.3	7.05
XP_025150371	sperm acrosome membrane-associated protein 1	SPACA1	3.73	27.517	19	4	48	4	1	299	33.1	4.61
XP_006059495	sperm acrosome membrane-associated protein 3	SPACA3	-0.59	4.236	7	1	2	1	1	163	18.1	5.49
XP_006041029	sperm acrosome membrane-associated protein 4	SPACA4	-3.1	9.423	18	1	7	1	1	126	13	6
XP_006062223	sperm acrosome-associated protein 9 isoform X1	SPACA9.1	5.18	3.326	4	1	1	1	1	224	25.1	8.54
XP_025117733	sperm acrosome-associated protein 9 isoform X2	SPACA9	5.18	3.326	6	1	1	1	1	169	19.3	7.52
XP_025152042	sperm equatorial segment protein 1	SPESP1	3.6	48.704	23	6	42	6	1	370	41.9	6.11
XP_006057707	sperm surface protein Sp17	SPA17	3.75	26.974	33	4	11	4	1	147	16.9	4.83
XP_025129710	spermadhesin Z13	LOC112581540	2.16	114.249	46	8	130	4	1	134	15.3	6.06
XP_025129711	spermadhesin Z13-like	LOC112577723	-0.38	69.87	40	6	96	2	1	134	15.3	5.94
XP_025149973	sperm-associated acrosin inhibitor-like isoform X1	LOC112587117	6.64	3.348	10	1	8	1	1	87	10.1	8.4
XP_025149975	sperm-associated acrosin inhibitor-like isoform X2	LOC112587117.1	6.64	3.348	10	1	8	1	1	86	10	8.6
XP_006072599	spermatid-associated protein isoform X1	SPERT	3.09	2.645	2	1	4	1	1	455	52.5	7.25
XP_025118794	spermatid-associated protein isoform X2	SPERT.2	3.09	2.645	2	1	4	1	1	428	49.3	6.93
XP_025118795	spermatid-associated protein isoform X3	SPERT.1	3.09	2.645	2	1	4	1	1	421	48.3	6.86
XP_025119160	spleen trypsin inhibitor I	LOC102392354	6.64	5.065	7	1	117	1	1	98	10.6	8.31
XP_025119161	spleen trypsin inhibitor I-like	LOC112577708	6.64	5.065	7	1	117	1	1	98	10.6	8.1
XP_006077612	splicing factor 3A subunit 3	SF3A3	4.92	5.009	5	1	1	1	1	501	58.9	5.38
XP_006064101	splicing factor U2AF 65 kDa subunit isoform X1	U2AF2	2.25	2.583	5	1	1	1	1	475	53.5	9.09
XP_006064102	splicing factor U2AF 65 kDa subunit isoform X2	U2AF2.1	2.25	2.583	6	1	1	1	1	471	53.1	9.09
XP_025144904	splicing factor, proline- and glutamine-rich isoform X1	SFPQ	4.9	18.363	6	2	8	2	1	707	76.2	9.44
XP_025144906	splicing factor, proline- and glutamine-rich isoform X2	SFPQ.1	4.9	18.363	6	2	8	2	1	669	72.3	9.23
XP_025147841	staphylococcal nuclease domain-containing protein 1	SND1	3.35	7.071	3	1	1	1	1	910	101.9	7.17
XP_006070901	stress-70 protein, mitochondrial	HSPA9	4.2	14.451	7	2	5	2	1	679	73.7	6.3
XP_006053542	succinate dehydrogenase [ubiquinone] flavoprotein subunit, mitochondrial	SDHA	0.77	4.824	2	1	1	1	1	665	73	7.49
XP_006048651	sulfhydryl oxidase 1 isoform X1	QSOX1	-2.24	4.055	4	1	1	1	1	887	96.3	9.16
XP_006048652	sulfhydryl oxidase 1 isoform X2	QSOX1.1	1.51	6.96	6	2	3	2	1	704	77.3	9.41
NP_001277902	superoxide dismutase [Cu-Zn]	SOD1	4.85	6.767	25	2	7	2	1	152	15.7	6.52
XP_006080238	synaptic functional regulator FMR1 isoform X1	FMR1.2	3.75	5.462	2	1	2	1	1	632	71.2	7.42
XP_025132851	synaptic functional regulator FMR1 isoform X10	FMR1.5	3.75	5.462	2	1	2	1	1	582	65.6	7.08
XP_006080247	synaptic functional regulator FMR1 isoform X11	FMR1.4	3.75	5.462	3	1	2	1	1	556	62.9	6.81
XP_006080239	synaptic functional regulator FMR1 isoform X2	FMR1.10	3.75	5.462	2	1	2	1	1	620	70	7.81
XP_006080240	synaptic functional regulator FMR1 isoform X3	FMR1	3.75	5.462	2	1	2	1	1	615	69.2	7.23
XP_006080241	synaptic functional regulator FMR1 isoform X4	FMR1.8	3.75	5.462	2	1	2	1	1	611	68.9	7.42
XP_006080242	synaptic functional regulator FMR1 isoform X5	FMR1.3	3.75	5.462	2	1	2	1	1	607	68.5	8.46
XP_006080243	synaptic functional regulator FMR1 isoform X6	FMR1.9	3.75	5.462	2	1	2	1	1	603	68	7.62
XP_006080244	synaptic functional regulator FMR1 isoform X7	FMR1.7	3.75	5.462	2	1	2	1	1	590	66.5	8.38
XP_006080245	synaptic functional regulator FMR1 isoform X8	FMR1.6	3.75	5.462	2	1	2	1	1	586	66.2	8.47
XP_006080246	synaptic functional regulator FMR1 isoform X9	FMR1.1	3.75	5.462	2	1	2	1	1	583	65.7	7.23
XP_006058445	T-complex protein 1 subunit beta	CCT2	5.56	34.406	12	3	9	3	1	535	57.4	6.64
XP_006080923	T-complex protein 1 subunit delta	CCT4	3.64	9.934	6	2	10	2	1	545	58.4	7.61
XP_006062005	T-complex protein 1 subunit epsilon	CCT5	4.5	1.604	2	1	2	1	1	541	59.6	5.91
XP_006045987	T-complex protein 1 subunit eta	CCT7	6.64	16.736	9	2	8	2	1	543	59.3	7.42
XP_006056409	T-complex protein 1 subunit theta isoform X1	CCT8	3.51	5.873	3	1	4	1	1	553	60.2	5.74
XP_006056410	T-complex protein 1 subunit theta isoform X2	CCT8.1	3.51	5.873	3	1	4	1	1	548	59.6	5.59
XP_006070409	T-complex protein 1 subunit zeta	CCT6A	0.4	9.49	8	2	3	2	1	531	57.9	6.76
XP_025148610	testicular haploid expressed gene protein isoform X1	THEG	4.56	1.706	2	1	1	1	1	381	44	9
XP_025148611	testicular haploid expressed gene protein isoform X2	THEG.1	4.56	1.706	2	1	1	1	1	357	41.1	9.01
XP_025145795	testicular haploid expressed gene protein-like	THEGL	3.31	5.757	3	1	2	1	1	458	52.1	9.33
XP_006065613	testis-specific serine/threonine-protein kinase 1	TSSK1B	4.39	7.803	4	1	5	1	1	367	41.5	7.21
XP_025135503	THO complex subunit 4	ALYREF	3.6	16.621	18	2	7	2	1	257	26.9	11.15
XP_006062177	transcription factor BTF3 isoform X1	BTF3	0.28	2.509	14	1	1	1	1	206	22.1	9.2
XP_006062178	transcription factor BTF3 isoform X2	BTF3.1	0.28	2.509	17	1	1	1	1	162	17.7	7.5
XP_006061090	transgelin-2	TAGLN2	1.46	8.667	22	2	2	2	1	199	22.4	8.24
XP_006064386	transitional endoplasmic reticulum ATPase	VCP	0.51	6.273	3	2	3	2	1	806	89.2	5.26
XP_006079897	transmembrane protease serine 11A isoform X1	TMPRSS11A.1	6.64	2.067	2	1	27	0	2	417	46.8	9.26
XP_006079898	transmembrane protease serine 11A isoform X2	TMPRSS11A	6.64	2.067	2	1	27	0	2	404	45.5	9.26
XP_006044777	transmembrane protease serine 13 isoform X1	TMPRSS13.1	6.64	2.067	2	1	27	0	2	515	57.2	8.29
XP_006044778	transmembrane protease serine 13 isoform X2	TMPRSS13	6.64	2.067	2	1	27	0	2	502	55.9	8.22
XP_025135819	transmembrane protein 101 isoform X2	LOC102414386.1	3.8	6.704	12	2	6	2	1	252	28.5	9.66
XP_006054058	transthyretin	TTR	-5.55	64.923	45	8	103	8	1	147	15.8	5.86
XP_006065910	triosephosphate isomerase	TPI1	4.15	23.722	23	5	7	5	1	286	30.6	6.55
XP_006051414	troponin C, skeletal muscle	TNNC2	3.47	2.402	4	1	8	1	1	161	18.2	4.2
XP_025139866	tubulin alpha-1A chain	LOC102414462	4.72	39.475	22	7	13	0	1	451	50.1	5.06
XP_006068865	tubulin alpha-1A chain-like	LOC102415619	3.95	32.443	19	6	12	0	2	451	50.2	5.11
XP_006054596	tubulin alpha-1B chain	LOC102399969	2.84	37.157	23	7	14	1	1	451	50.1	5.06
XP_025139867	tubulin alpha-1C chain	LOC102405836	4.72	32.308	16	5	11	0	2	449	49.9	5.06
XP_025139868	tubulin alpha-1C chain	LOC112584592	4.72	23.997	13	4	7	0	2	449	49.8	5.1
XP_006059042	tubulin alpha-1D chain	LOC102397197	4.72	39.475	22	7	13	0	1	452	50.3	5.03
XP_025122971	tubulin alpha-3 chain	LOC102413407	3.36	43.579	24	8	22	2	1	450	49.9	5.1
XP_006059043	tubulin alpha-4A chain	TUBA4A	2.84	14.729	14	4	8	1	1	448	49.9	5.06
XP_006052418	tubulin beta chain	TUBB	3.28	41.686	23	6	30	6	1	444	49.6	4.89
XP_025120717	tubulin beta-2A chain	TUBB2A	1.68	33.502	13	4	25	4	1	445	49.9	4.89
XP_025120761	tubulin beta-2B chain isoform X1	LOC102411164.1	1.68	33.502	13	4	25	4	1	445	49.9	4.89
XP_025120766	tubulin beta-2B chain isoform X2	LOC102411164	1.68	33.502	15	4	25	4	1	373	41.9	4.91
XP_006045174	tubulin beta-4A chain	TUBB4A	2.34	30.028	23	5	26	5	1	444	49.6	4.88
XP_006062617	tubulin beta-4B chain	TUBB4B	2.81	64.191	33	10	53	10	1	445	49.8	4.89
XP_006043089	tubulin beta-6 chain isoform X1	TUBB6.1	3.29	24.869	8	3	12	3	1	446	49.9	4.86
XP_025129011	tubulin beta-6 chain isoform X2	TUBB6	3.29	24.869	9	3	12	3	1	374	42	4.87
XP_025151806	tubulin polymerization-promoting protein family member 2 isoform X1	TPPP2.3	6.64	7.751	6	1	4	1	1	314	34.6	9.04
XP_006062131	tubulin polymerization-promoting protein family member 2 isoform X2	TPPP2	6.64	7.751	6	1	4	1	1	286	31.2	9.11
XP_006062132	tubulin polymerization-promoting protein family member 2 isoform X3	TPPP2.1	6.64	7.751	6	1	4	1	1	282	30.9	8.92
XP_025151807	tubulin polymerization-promoting protein family member 2 isoform X4	TPPP2.2	6.64	7.751	8	1	4	1	1	232	25.7	8.6
XP_025119525	tyrosine-protein phosphatase non-receptor type substrate 1 isoform X1	LOC102394624	2.35	9.455	10	2	3	2	1	337	37.2	9.25
XP_006049053	tyrosine-protein phosphatase non-receptor type substrate 1 isoform X2	LOC102394624.1	2.35	9.455	12	2	3	2	1	286	31.5	9.14
XP_006053505	U4/U6 small nuclear ribonucleoprotein Prp31	PRPF31	4.39	7.555	5	1	1	1	1	499	55.4	5.78
XP_025116402	U5 small nuclear ribonucleoprotein 200 kDa helicase	SNRNP200	2.21	3.176	1	1	1	1	1	2136	244.2	6.06
XP_025124503	ubiquinone biosynthesis protein COQ9, mitochondrial	COQ9	4.42	3.871	6	1	3	1	1	319	35.6	6
XP_025137005	uncharacterized protein C17orf47 homolog	C3H17orf47	3.4	3.023	3	1	3	1	1	570	63.1	9.94
XP_025140197	uncharacterized protein C3orf30 homolog isoform X1	C1H3orf30.1	1.23	6.738	7	2	3	2	1	492	56	4.72
XP_025140201	uncharacterized protein C3orf30 homolog isoform X2	C1H3orf30.2	1.23	6.738	7	2	3	2	1	491	55.9	4.72
XP_025140205	uncharacterized protein C3orf30 homolog isoform X3	C1H3orf30	1.23	6.738	8	2	3	2	1	471	53.5	4.74
XP_006046553	uncharacterized protein C7orf61 homolog isoform X1	C24H7orf61	5.1	21.203	31	6	11	6	1	204	23.5	10.78
XP_006046552	uncharacterized protein C7orf61 homolog isoform X2	C24H7orf61.1	5.1	21.203	32	6	11	6	1	200	22.4	10.43
XP_025152195	uncharacterized protein LOC102395477	LOC102395477	4.22	50.563	41	10	588	7	1	333	37.1	11.36
XP_025128177	uncharacterized protein LOC102396653	LOC102396653	1.17	9.688	3	1	1	1	1	1204	129.3	6.64
XP_025125571	uncharacterized protein LOC102403160	LOC102403160	3.29	29.924	5	4	16	4	1	916	100.5	6.83
XP_006049258	uncharacterized protein LOC102411789	LOC102411789	6.64	96.04	28	5	482	2	1	397	44.2	11.11
XP_025152187	uncharacterized protein LOC102411988	LOC102411988	4.22	50.563	42	10	588	7	1	328	36.5	11.3
XP_025118123	UTP--glucose-1-phosphate uridylyltransferase isoform X1	UGP2	-1.85	1.609	2	1	2	1	1	514	57.4	7.88
XP_006064851	UTP--glucose-1-phosphate uridylyltransferase isoform X2	UGP2.1	-1.85	1.609	2	1	2	1	1	508	56.9	7.88
XP_006064853	UTP--glucose-1-phosphate uridylyltransferase isoform X3	UGP2.2	-1.85	1.609	2	1	2	1	1	497	55.6	7.61
XP_025118124	UTP--glucose-1-phosphate uridylyltransferase isoform X4	UGP2.3	-1.85	1.609	2	1	2	1	1	431	47.9	8.56
XP_025138858	vesicle-associated membrane protein 1 isoform X1	VAMP1.1	6.34	2.173	4	1	2	1	1	188	20.7	10.61
XP_006065854	vesicle-associated membrane protein 1 isoform X2	VAMP1	6.34	2.173	6	1	2	1	1	118	12.8	6.65
XP_006062958	vesicle-associated membrane protein 2	VAMP2	6.34	2.173	6	1	2	1	1	116	12.6	8.13
XP_025143019	vesicle-associated membrane protein 3	VAMP3	4.72	7.914	23	2	4	2	1	104	11.6	8.79
XP_006052426	vimentin	VIM	6.52	32.406	10	4	160	4	1	466	53.7	5.12
XP_025136892	WAP four-disulfide core domain protein 18-like	LOC112583794	6.64	7.553	16	1	6	1	1	93	9.6	8.84
XP_025136891	WAP four-disulfide core domain protein 18-like	LOC112583793	6.64	7.553	16	1	6	1	1	93	9.5	5.29
XP_006043414	WAP four-disulfide core domain protein 2	WFDC2	6.64	65.975	63	7	285	7	1	123	12.7	4.48
XP_025131416	xin actin-binding repeat-containing protein 2 isoform X1	XIRP2	-6.64	6.02	0	1	8	1	1	3306	374.8	6.19
XP_006053677	zinc-alpha-2-glycoprotein isoform X1	AZGP1.1	5.52	9.847	14	2	8	2	1	299	34	5.53
XP_025130733	zinc-alpha-2-glycoprotein isoform X2	AZGP1	3	7.933	9	1	1	1	1	275	30.9	6.7
XP_025146591	zona pellucida-binding protein 1 isoform X1	ZPBP.6	0.47	25.181	16	5	30	5	1	357	40.2	8.32
XP_025146592	zona pellucida-binding protein 1 isoform X2	ZPBP.5	0.47	25.181	16	5	30	5	1	353	40.2	8.78
XP_025146593	zona pellucida-binding protein 1 isoform X3	ZPBP.7	-0.46	33.435	21	6	32	6	1	350	39.4	8.72
XP_025146594	zona pellucida-binding protein 1 isoform X4	ZPBP.3	0.47	25.181	17	5	30	5	1	330	37.5	7.78
XP_025146595	zona pellucida-binding protein 1 isoform X5	ZPBP.2	0.47	25.181	17	5	30	5	1	325	36.9	8.95
XP_025146596	zona pellucida-binding protein 1 isoform X6	ZPBP.4	0.47	25.181	17	5	30	5	1	322	36.5	8.97
XP_025146597	zona pellucida-binding protein 1 isoform X7	ZPBP	3.42	8.055	7	2	17	2	1	315	35.3	7.8
XP_025146598	zona pellucida-binding protein 1 isoform X8	ZPBP.1	3.42	8.055	7	2	17	2	1	288	32.7	6.83

## Sheet: Cap
Accession	Description	Gene Name	Abundance Ratio (log2): (CAPACITATED, Sample) / (CAPACITATED CONTROL, Control)	Sum PEP Score	Coverage [%]	# Peptides	# PSMs	# Unique Peptides	# Protein Groups	# AAs	MW [kDa]	calc. pI
XP_025119204	14-3-3 protein beta/alpha	YWHAB	2.11	4.706	7	1	2	1	1	246	28.1	4.83
XP_006079841	14-3-3 protein epsilon isoform X1	YWHAE.1	3.65	3.721	5	1	3	1	1	255	29.2	4.74
XP_006079842	14-3-3 protein epsilon isoform X2	YWHAE	3.65	3.721	5	1	3	1	1	240	27.4	4.89
XP_006057193	14-3-3 protein gamma	YWHAG	2.11	4.706	6	1	2	1	1	247	28.3	4.89
XP_006055529	14-3-3 protein sigma	SFN	2.2	4.394	6	1	1	1	1	248	27.8	4.77
XP_006073847	14-3-3 protein theta	YWHAQ	3.73	10.589	4	2	11	2	1	245	27.7	4.78
XP_006046494	14-3-3 protein zeta/delta	YWHAZ	3.75	61.13	25	8	75	8	1	245	27.7	4.79
XP_006056777	26S proteasome non-ATPase regulatory subunit 2	PSMD2	2.33	4.77	3	1	1	1	1	908	100.2	5.2
XP_006055154	26S proteasome non-ATPase regulatory subunit 4 isoform X1	PSMD4.1	1.32	3.391	4	1	1	1	1	380	41.1	4.81
XP_006055155	26S proteasome non-ATPase regulatory subunit 4 isoform X2	PSMD4	1.32	3.391	4	1	1	1	1	377	40.7	4.79
XP_006057428	26S proteasome regulatory subunit 6A isoform X1	PSMC3	3.92	2.195	2	1	1	1	1	440	49.3	5.29
XP_025121863	26S proteasome regulatory subunit 6A isoform X2	PSMC3.1	3.92	2.195	2	1	1	1	1	394	44	5.74
XP_006073535	40S ribosomal protein S17	RPS17	3.75	3.837	13	1	3	1	1	205	23.2	10.15
XP_006050373	40S ribosomal protein S18 isoform X1	RPS18	3.59	3.692	7	1	1	1	1	152	17.7	10.99
XP_006069795	40S ribosomal protein S25	LOC102411662	1.1	4.767	15	2	4	2	1	125	13.7	10.11
XP_006067329	40S ribosomal protein S5	RPS5	-0.75	1.426	7	1	1	1	1	204	22.9	9.72
XP_006067029	45 kDa calcium-binding protein	SDF4	3.69	4.942	5	2	7	2	1	355	41.1	4.91
XP_006078222	60 kDa heat shock protein, mitochondrial	HSPD1	1.09	6.217	4	1	3	1	1	573	60.9	5.87
XP_025133961	A disintegrin and metallopeptidase domain 3 isoform X1	LOC102405271	1.88	3.812	2	1	1	1	1	766	85.7	7.43
XP_006078702	A disintegrin and metallopeptidase domain 3 isoform X2	LOC102405271.1	1.88	3.812	2	1	1	1	1	751	84	7.27
XP_025133968	A disintegrin and metallopeptidase domain 3 isoform X3	LOC102405271.3	1.88	3.812	2	1	1	1	1	736	82.5	7.34
XP_025133977	A disintegrin and metallopeptidase domain 3 isoform X4	LOC102405271.2	1.88	3.812	2	1	1	1	1	736	82.8	7.31
XP_025133986	A disintegrin and metallopeptidase domain 3 isoform X5	LOC102405271.4	1.88	3.812	2	1	1	1	1	643	71.9	7.36
XP_025148263	acrosin inhibitor 1	LOC102401452	5.05	55.866	44	7	244	7	1	85	10	4.61
XP_025138352	acrosin isoform X1	ACR.1	-2.84	66.531	27	9	56	9	1	414	45.4	9.45
XP_025138353	acrosin isoform X2	ACR	-2.84	66.531	30	9	56	9	1	377	41.5	9.44
XP_006065879	acrosin-binding protein isoform X1	ACRBP.2	-2.66	103.094	23	13	97	13	1	542	61.3	5.02
XP_025138879	acrosin-binding protein isoform X2	ACRBP	-2.29	56.4	15	8	69	8	1	486	54.9	4.97
XP_025138880	acrosin-binding protein isoform X3	ACRBP.1	-2.01	85.089	24	11	83	11	1	469	53.3	4.97
XP_025142152	acrosomal protein SP-10	ACRV1	3.77	80.498	21	7	119	7	1	273	28.9	4.63
XP_006044050	actin, alpha cardiac muscle 1	ACTC1	2.38	27.779	16	5	20	5	1	377	42	5.39
XP_006063116	actin, alpha skeletal muscle	ACTA1	2.38	27.779	16	5	20	5	1	377	42	5.39
NP_001277861	actin, cytoplasmic 1	ACTB	2.51	23.333	16	5	14	5	1	375	41.6	5.3
XP_025130274	actin, cytoplasmic 1 isoform X1	ACTB.1	1.96	40.85	23	7	38	7	1	375	41.7	5.48
XP_025135478	actin, cytoplasmic 2	ACTG1	1.96	40.85	23	7	38	7	1	375	41.8	5.48
XP_006046012	actin, gamma-enteric smooth muscle	ACTG2	2.38	27.779	16	5	20	5	1	376	41.9	5.48
XP_025137973	actin-like protein 7A	ACTL7A	1.32	6.02	9	2	5	2	1	438	49	6.99
XP_006042743	actin-related protein T2	ACTRT2	1.01	2.653	3	1	2	1	1	377	41.9	5.6
XP_006053336	acylamino-acid-releasing enzyme isoform X1	APEH	2.59	5.373	2	1	2	1	1	730	81	5.33
XP_025128673	acylamino-acid-releasing enzyme isoform X2	APEH.1	2.59	5.373	2	1	2	1	1	650	71.8	5.08
XP_006074532	adenylate kinase isoenzyme 1 isoform X1	AK1.1	4.64	11.258	22	3	6	3	1	211	23.4	8.1
XP_006074537	adenylate kinase isoenzyme 1 isoform X2	AK1	4.64	11.258	24	3	6	3	1	194	21.7	7.91
XP_025122423	ADM isoform X1	ADM.1	5.19	73.699	39	12	139	12	1	189	21.1	11.06
XP_025122424	ADM isoform X2	ADM	5.06	51.283	33	9	96	9	1	188	21	11.06
XP_006046025	ADP-ribose pyrophosphatase, mitochondrial isoform X1	NUDT9	6.19	6.335	3	1	3	1	1	349	38.7	8.28
XP_006046027	ADP-ribose pyrophosphatase, mitochondrial isoform X2	NUDT9.1	6.19	6.335	4	1	3	1	1	300	33.9	7.28
XP_006059541	A-kinase anchor protein 4 isoform X1	AKAP4	2.73	49.3	15	9	31	9	1	860	95.6	6.87
XP_006059540	A-kinase anchor protein 4 isoform X2	AKAP4.1	2.73	49.3	15	9	31	9	1	848	94.3	6.79
XP_006071961	alanine--glyoxylate aminotransferase 2, mitochondrial	AGXT2	6.64	1.435	4	1	1	1	1	514	57.4	8.03
XP_006042389	aldose reductase	AKR1B1	5.3	9.128	6	2	11	2	1	316	35.9	6.39
XP_006048607	alkaline phosphatase, tissue-nonspecific isozyme isoform X1	ALPL	3.8	8.926	5	2	11	2	1	524	57.2	6.77
XP_025134560	alkaline phosphatase, tissue-nonspecific isozyme isoform X2	ALPL.1	3.01	5.532	3	1	3	1	1	469	51.1	6.55
XP_025132614	allergen Bos d 2-like	LOC102396043	3.53	2.555	3	1	13	1	1	276	31.4	5.12
XP_006074847	allergen Bos d 2-like isoform X1	LOC102393892	5.17	6.686	10	1	7	1	1	172	19.2	4.73
NP_001277864	alpha-1-acid glycoprotein 1	ORM1	-3.71	87.304	25	9	158	9	1	166	19.3	5.64
XP_006049591	alpha-1-antitrypsin	SERPINA1	3.64	18.165	13	4	20	4	1	416	45.9	6.43
XP_025126199	alpha-1B-glycoprotein isoform X1	A1BG.1	2.31	5.24	3	1	2	1	1	503	53.7	5.52
XP_025126200	alpha-1B-glycoprotein isoform X2	A1BG	2.31	5.24	3	1	2	1	1	491	52.5	5.62
XP_025136673	alpha-2-antiplasmin isoform X1	SERPINF2.2	4.53	7.343	5	2	5	2	1	503	55.9	5.62
XP_006079823	alpha-2-antiplasmin isoform X2	SERPINF2.1	4.53	7.343	5	2	5	2	1	492	54.8	5.62
XP_006079824	alpha-2-antiplasmin isoform X3	SERPINF2	4.53	7.343	5	2	5	2	1	491	54.7	5.62
XP_006069848	alpha-2-macroglobulin isoform X1	LOC102402539.1	4.54	9.013	1	2	16	2	1	1474	163.6	5.99
XP_025138969	alpha-2-macroglobulin isoform X2	LOC102402539	4.54	9.013	1	2	16	2	1	1473	163.4	6.04
XP_006064972	alpha-centractin	ACTR1A	-1.02	1.716	6	1	1	1	1	376	42.6	6.64
XP_006076743	alpha-enolase isoform X1	ENO1.1	2.4	46.984	20	7	37	7	1	434	47.3	6.8
XP_006076744	alpha-enolase isoform X2	ENO1	0.79	29.115	16	5	24	5	1	434	47.4	6.46
XP_025145699	alpha-fetoprotein	AFP	-6.18	6.634	1	2	149	2	1	610	68.5	6.29
XP_025116598	Alstrom syndrome protein 1 isoform X1	ALMS1.2	2.55	4.783	0	1	3	1	1	4203	468.4	6
XP_025116599	Alstrom syndrome protein 1 isoform X2	ALMS1.1	2.55	4.783	0	1	3	1	1	4186	466.4	5.99
XP_025116600	Alstrom syndrome protein 1 isoform X3	ALMS1.7	2.55	4.783	0	1	3	1	1	4161	463.7	6.01
XP_025116602	Alstrom syndrome protein 1 isoform X4	ALMS1	2.55	4.783	0	1	3	1	1	4161	463.9	5.99
XP_025116603	Alstrom syndrome protein 1 isoform X5	ALMS1.6	2.55	4.783	0	1	3	1	1	3739	416.6	6.19
XP_006045992	Alstrom syndrome protein 1 isoform X6	ALMS1.5	2.55	4.783	0	1	3	1	1	3698	412	6.21
XP_025116604	Alstrom syndrome protein 1 isoform X7	ALMS1.4	2.55	4.783	0	1	3	1	1	3660	408.2	6.27
XP_006045993	Alstrom syndrome protein 1 isoform X8	ALMS1.3	2.55	4.783	0	1	3	1	1	3619	403.6	6.29
XP_025137742	amyloid-beta A4 protein isoform X1	APP.1	2.89	10.211	4	2	4	2	1	770	86.9	4.84
XP_025137746	amyloid-beta A4 protein isoform X2	APP.3	2.89	10.211	4	2	4	2	1	752	85	4.83
XP_025137753	amyloid-beta A4 protein isoform X3	APP.2	2.89	10.211	4	2	4	2	1	751	84.8	4.82
XP_025137757	amyloid-beta A4 protein isoform X4	APP	2.89	10.211	4	2	4	2	1	733	82.9	4.81
XP_025137759	amyloid-beta A4 protein isoform X5	APP.5	2.41	5.716	2	1	3	1	1	714	80.7	4.87
XP_025137769	amyloid-beta A4 protein isoform X6	APP.6	2.41	5.716	2	1	3	1	1	695	78.6	4.84
XP_025137776	amyloid-beta A4 protein isoform X7	APP.4	2.41	5.716	2	1	3	1	1	677	76.7	4.83
XP_025151784	angiogenin	ANG	3.93	53.317	32	8	64	8	1	148	16.9	8.66
XP_006044190	angiotensin-converting enzyme isoform X1	LOC102392455.2	2.58	7.44	1	3	13	1	1	1306	150.1	6.4
XP_006044191	angiotensin-converting enzyme isoform X2	LOC102392455.1	2.58	7.44	1	3	13	1	1	1258	144.7	6.46
XP_006044192	angiotensin-converting enzyme isoform X3	LOC102392455	2.58	7.44	2	3	13	1	1	767	87.5	7.08
XP_006063725	antithrombin-III	SERPINC1	4.23	4.461	2	1	5	1	1	465	52.4	6.8
XP_006067602	apolipoprotein E	APOE	4.06	9.629	8	2	8	2	1	316	36	5.68
XP_006066761	aquaporin-7 isoform X1	AQP7	-0.06	12.659	8	1	7	1	1	330	35.9	9.28
XP_006066762	aquaporin-7 isoform X2	AQP7.2	-0.06	12.659	9	1	7	1	1	306	33.2	7.93
XP_025137687	aquaporin-7 isoform X3	AQP7.1	-0.06	12.659	9	1	7	1	1	298	32.1	8.44
XP_006075344	ATP synthase subunit alpha, mitochondrial	ATP5F1A	1.21	3.916	2	1	2	1	1	553	59.7	9.19
XP_006049715	ATPase inhibitor, mitochondrial	ATP5IF1	3.81	4.407	23	2	4	2	1	109	12.3	9.35
XP_025144944	autophagy-related protein 16-1 isoform X1	ATG16L1.2	5.16	1.391	1	1	3	0	2	573	64.2	6.09
XP_025144945	autophagy-related protein 16-1 isoform X2	ATG16L1.3	5.16	1.391	1	1	3	0	2	554	62.3	6
XP_006041818	autophagy-related protein 16-1 isoform X3	ATG16L1	5.16	1.391	1	1	3	0	2	607	68.3	6.47
XP_006041819	autophagy-related protein 16-1 isoform X4	ATG16L1.1	5.16	1.391	1	1	3	0	2	588	66.3	6.39
XP_025150853	beta-2-microglobulin	LOC112587746	4.29	21.457	15	3	26	3	1	118	13.6	8
XP_006078184	beta-defensin 107A-like	LOC102394138	3.03	2.617	13	1	2	1	1	70	8	8.76
XP_006050778	beta-defensin 110 isoform X7	LOC102395067	3.14	2.928	16	1	3	1	1	69	8.1	9.63
XP_025124399	beta-defensin 112 isoform X3	LOC102395067.1	5.72	7.937	17	2	8	2	1	121	13.8	8.78
XP_025119521	beta-defensin 113	DEFB113	4.14	17.091	19	3	14	3	1	117	13.4	8.78
XP_025120395	beta-defensin 116, partial	DEFB116	2.42	6.158	15	1	4	1	1	116	13.2	8.38
XP_006060739	beta-defensin 119 isoform X1	LOC102413260.1	2.7	4.708	12	1	4	1	1	83	9.8	8.73
XP_025120495	beta-defensin 121 isoform X2	LOC102413260	5.51	9.984	15	1	24	1	1	80	9.3	7.61
XP_006060738	beta-defensin 123	DEFB123	1.28	7.375	21	2	2	2	1	67	7.8	9.83
XP_006049642	beta-defensin 129	DEFB129	4.74	2.472	5	1	4	1	1	170	19.2	9.42
XP_025137121	beta-defensin 43-like	LOC112583835	6.64	7.374	16	1	4	1	1	69	8	9.2
XP_006060126	beta-enolase isoform X1	ENO3	0.42	8.123	4	1	8	1	1	440	47.7	8.34
XP_006060127	beta-enolase isoform X2	ENO3.1	0.42	8.123	4	1	8	1	1	434	47	7.97
XP_025142549	beta-galactoside alpha-2,6-sialyltransferase 1 isoform X1	ST6GAL1.1	2.98	12.796	5	2	8	2	1	405	46.3	8.95
XP_025142557	beta-galactoside alpha-2,6-sialyltransferase 1 isoform X2	ST6GAL1	2.98	12.796	6	2	8	2	1	372	42.6	9.17
XP_025126643	beta-hexosaminidase subunit beta-like isoform X1	LOC102398732.2	0.96	3.918	3	1	1	1	1	548	62.3	7.39
XP_025126644	beta-hexosaminidase subunit beta-like isoform X2	LOC102398732.1	0.96	3.918	3	1	1	1	1	548	62.4	7.58
XP_025126645	beta-hexosaminidase subunit beta-like isoform X3	LOC102398732	0.96	3.918	5	1	1	1	1	331	38	6.6
XP_006065751	beta-microseminoprotein	MSMB	2.98	18.201	26	4	19	4	1	111	12.3	5.12
XP_025131636	brain acid soluble protein 1	LOC112582018	1.92	6.072	13	1	4	1	1	227	23	4.6
XP_025126466	brain acid soluble protein 1 isoform X1	BASP1	1.92	6.072	13	1	4	1	1	232	23.6	4.63
XP_025126467	brain acid soluble protein 1 isoform X2	BASP1.1	1.92	6.072	13	1	4	1	1	227	23.1	4.6
XP_006047698	cadherin-1	CDH1	3.13	9.387	3	2	15	2	1	883	98.1	4.88
XP_025129024	cadherin-2	CDH2	3.72	2.394	1	1	1	1	1	906	99.8	4.79
XP_025121742	calcitonin receptor-stimulating peptide 2	LOC102407248	3.68	3.654	14	2	3	2	1	125	14.3	9.47
XP_025129120	calcium-binding tyrosine phosphorylation-regulated protein isoform X1	CABYR.1	2.14	39.828	23	6	43	3	1	454	48.7	4.89
XP_025130476	calcium-regulated heat-stable protein 1	CARHSP1	5.39	3.732	8	1	3	1	1	147	15.9	7.87
XP_006073663	calicin	CCIN	6.64	7.701	3	1	2	1	1	588	66.8	8.25
XP_025123873	calmegin	CLGN	4.68	24.743	9	3	18	3	1	606	69.6	4.73
XP_025150878	calmodulin-1 isoform X1	CALM1	2.63	30.094	41	4	22	4	1	150	17	4.22
XP_006054867	calmodulin-2	CALM2	2.63	30.094	42	4	22	4	1	149	16.8	4.22
XP_006048328	calmodulin-like	LOC102403292	3.65	26.943	30	3	21	3	1	149	16.8	4.27
XP_006043080	calmodulin-like	LOC102393421	3.18	15.616	20	2	13	2	1	148	16.8	4.39
XP_025132787	calmodulin-like	LOC102416387	3.65	11.327	12	1	8	1	1	139	16	4.46
XP_006041616	calreticulin	CALR	6.14	1.733	2	1	3	1	1	417	48	4.46
XP_006046920	caltrin	LOC102413729	2.31	19.796	30	6	48	6	1	140	15.6	10.15
XP_006074457	calumenin isoform X1	CALU	2.07	4.246	4	1	2	1	1	315	37.1	4.64
XP_025147270	calumenin isoform X2	CALU.1	2.07	4.246	4	1	2	1	1	315	37.1	4.59
XP_025149457	cAMP-dependent protein kinase catalytic subunit alpha isoform X1	PRKACA	3.4	2.702	3	1	1	1	1	351	40.6	8.65
XP_006066594	cAMP-dependent protein kinase catalytic subunit alpha isoform X2	PRKACA.1	3.4	2.702	3	1	1	1	1	343	39.9	8.48
XP_006061971	cAMP-dependent protein kinase type I-alpha regulatory subunit	PRKAR1A	3.53	19.316	9	4	49	4	1	380	42.9	5.35
XP_006065206	cAMP-dependent protein kinase type II-alpha regulatory subunit	PRKAR2A	3.79	16.093	14	4	16	4	1	401	45.1	4.93
XP_025132121	cancer/testis antigen 47A	LOC102397898	4.43	40.173	22	3	28	3	1	253	26.9	4.5
XP_025133354	cancer/testis antigen 47A-like	LOC102411503	1.81	4.931	12	1	1	1	1	277	29.7	4.37
XP_025133614	cancer/testis antigen 47A-like isoform X1	LOC112582802.1	1.81	4.931	12	1	1	1	1	277	29.7	4.37
XP_025132161	cancer/testis antigen 47A-like isoform X1	LOC112582129.1	1.81	4.931	12	1	1	1	1	277	29.6	4.4
XP_025133355	cancer/testis antigen 47A-like isoform X1	LOC112582685	1.81	4.931	12	1	1	1	1	277	29.7	4.41
XP_025133415	cancer/testis antigen 47A-like isoform X1	LOC112582730	1.81	4.931	12	1	1	1	1	277	29.6	4.44
XP_025133615	cancer/testis antigen 47A-like isoform X2	LOC112582802	1.81	4.931	12	1	1	1	1	275	29.5	4.35
XP_025133618	cancer/testis antigen 47A-like isoform X2	LOC112582803	1.81	4.931	12	1	1	1	1	275	29.4	4.41
XP_025132162	cancer/testis antigen 47A-like isoform X2	LOC112582129	1.81	4.931	12	1	1	1	1	275	29.4	4.37
XP_025120772	carbonic anhydrase 2	CA2	3.42	2.98	3	1	3	1	1	260	29.1	6.76
XP_025120842	carboxypeptidase Q isoform X1	CPQ	-3.63	31.138	13	5	23	5	1	498	54.5	6.09
XP_025120843	carboxypeptidase Q isoform X2	CPQ.1	-3.63	31.138	14	5	23	5	1	483	52.8	6.09
XP_006061199	cartilage acidic protein 1 isoform X1	CRTAC1	3.75	15.773	5	2	10	2	1	645	70.3	5.24
XP_025129675	cartilage acidic protein 1 isoform X2	CRTAC1.2	3.75	15.773	5	2	10	2	1	622	67.9	5.2
XP_025129676	cartilage acidic protein 1 isoform X3	CRTAC1.1	3.75	15.773	5	2	10	2	1	616	67.3	5.2
NP_001277882	cathelicidin precursor	CATH	1.19	3.789	7	1	1	1	1	188	21.4	10.7
XP_025127743	cathelicidin-2	LOC102413933	5.82	3.868	9	2	5	2	1	176	19.8	8.5
XP_006065248	cathelicidin-4 isoform X1	LOC102412295	5.82	2.096	5	1	3	1	1	152	16.7	5.17
XP_006065249	cathelicidin-4 isoform X2	LOC102412295.1	5.82	2.096	6	1	3	1	1	144	16.2	6.62
XP_025127742	cathelicidin-4 isoform X3	LOC102412295.2	5.82	2.096	6	1	3	1	1	130	14.4	6.1
XP_025127739	cathelicidin-4-like	LOC112581107	5.82	2.096	5	1	3	1	1	148	17.2	7.75
XP_025127733	cathelicidin-4-like	LOC112581106	5.82	2.096	5	1	3	1	1	148	17.1	7.75
XP_025127734	cathelicidin-4-like isoform X1	LOC112577733.1	5.82	2.096	6	1	3	1	1	144	16.2	7.75
XP_025127735	cathelicidin-4-like isoform X2	LOC112577733	5.82	2.096	6	1	3	1	1	130	14.5	6.1
XP_025127736	cathelicidin-5 isoform X1	LOC102402381.1	5.82	2.096	5	1	3	1	1	160	17.9	8.47
XP_025127737	cathelicidin-5 isoform X2	LOC102402381	5.82	2.096	5	1	3	1	1	151	16.5	4.88
XP_025127738	cathelicidin-5 isoform X3	LOC102402381.2	5.82	2.096	5	1	3	1	1	149	16.6	4.88
XP_006044419	cathepsin F isoform X1	CTSF	2.95	6.042	4	2	5	2	1	460	50.8	8.35
XP_006044420	cathepsin F isoform X2	CTSF.1	2.95	6.042	4	2	5	2	1	459	50.6	8.46
XP_006058190	cathepsin S	CTSS	3.82	2.133	5	1	3	1	1	331	37.2	7.44
XP_006052153	cationic trypsin	LOC102403534	2.72	165.949	45	11	1063	4	1	246	25.8	7.91
XP_025147484	cationic trypsin-like	LOC102403209	-1.85	115.98	49	8	1104	1	1	246	25.9	7.91
XP_006058368	C-C motif chemokine 2	LOC102408963	4.22	17.292	34	5	18	5	1	99	11.1	9.48
XP_025143365	CD5 antigen-like isoform X2	CD5L.2	2.92	2.478	1	1	2	1	1	669	74.1	5.05
XP_025143366	CD5 antigen-like isoform X3	CD5L.1	2.92	2.478	1	1	2	1	1	665	73.8	5.05
XP_006062451	CD59 glycoprotein	CD59	4.47	2.662	7	1	8	1	1	122	13.6	7.74
XP_006054804	centrosomal protein of 162 kDa isoform X1	CEP162.1	6.46	5.362	1	3	20	1	1	1402	161.4	5.5
XP_025150355	centrosomal protein of 162 kDa isoform X2	CEP162	6.46	5.362	1	3	20	1	1	1335	153.5	5.49
XP_006063186	ceruloplasmin isoform X1	CP	-2.53	12.155	4	4	10	4	1	1090	124.2	6.19
XP_025145881	ceruloplasmin isoform X2	CP.2	-2.53	12.155	5	4	10	4	1	1061	120.6	6.13
XP_025145887	ceruloplasmin isoform X3	CP.1	-2.53	12.155	5	4	10	4	1	1059	120.5	6.13
XP_006072656	cilia- and flagella-associated protein 20	CFAP20	5.07	2.256	4	1	10	1	1	193	22.7	9.76
XP_006057662	cilia- and flagella-associated protein 91 isoform X1	MAATS1.2	1.47	3.048	2	1	1	1	1	764	89.8	7.71
XP_025140386	cilia- and flagella-associated protein 91 isoform X2	MAATS1	1.47	3.048	2	1	1	1	1	689	81.2	6.9
XP_025140389	cilia- and flagella-associated protein 91 isoform X3	MAATS1.1	1.47	3.048	2	1	1	1	1	638	75	6.58
XP_025145355	cilia- and flagella-associated protein 99	CFAP99	3.15	2.07	2	1	3	1	1	645	75.3	9.77
XP_006073657	clathrin light chain A isoform X1	CLTA.1	4.83	1.556	3	1	1	1	1	243	26.8	4.51
XP_006073658	clathrin light chain A isoform X2	CLTA.2	4.83	1.556	3	1	1	1	1	225	24.7	4.5
XP_006073660	clathrin light chain A isoform X3	CLTA	3.67	9.968	13	2	4	2	1	213	23.4	4.53
XP_006060322	clusterin	CLU	4.17	186.985	36	20	343	20	1	439	51	6.07
XP_025134937	clusterin-like	LOC102393597	2.58	5.931	6	1	9	1	1	214	24.4	8.43
XP_006077608	C-Myc-binding protein	MYCBP	4.06	6.172	11	2	2	2	1	126	14	5.91
XP_025138945	c-Myc-binding protein	LOC102405126	4.06	6.172	12	2	2	2	1	118	13.4	5.91
XP_006073580	coiled-coil domain-containing protein 105	CCDC105	2.23	3.305	2	1	1	1	1	500	57.6	9.67
XP_025124549	coiled-coil domain-containing protein 113 isoform X1	CCDC113	0.74	5.493	4	1	2	1	1	381	44.7	8.73
XP_006072665	coiled-coil domain-containing protein 113 isoform X2	CCDC113.1	0.74	5.493	4	1	2	1	1	377	44.2	8.73
XP_025124550	coiled-coil domain-containing protein 113 isoform X3	CCDC113.2	0.74	5.493	4	1	2	1	1	336	39.9	9.61
XP_006065650	coiled-coil domain-containing protein 116 isoform X1	CCDC116.1	3.97	6.434	4	2	5	2	1	625	68.8	9.67
XP_006065651	coiled-coil domain-containing protein 116 isoform X2	CCDC116	3.97	6.434	4	2	5	2	1	617	68	9.74
XP_006074448	coiled-coil domain-containing protein 136 isoform X1	CCDC136.3	2.44	19.972	5	5	14	5	1	1204	138.8	4.77
XP_006074449	coiled-coil domain-containing protein 136 isoform X2	CCDC136	2.44	19.972	5	5	14	5	1	1201	138.1	4.75
XP_025147271	coiled-coil domain-containing protein 136 isoform X3	CCDC136	2.62	22.561	6	6	18	6	1	1044	121.3	4.87
XP_006074453	coiled-coil domain-containing protein 136 isoform X4	CCDC136.2	2.44	19.972	6	5	14	5	1	985	113.5	4.79
XP_025147272	coiled-coil domain-containing protein 136 isoform X5	CCDC136.3	2.52	8.347	7	2	3	2	1	447	51	4.58
XP_025149247	coiled-coil domain-containing protein 151 isoform X1	CCDC151	2.45	4.785	2	1	2	1	1	622	72.1	8.38
XP_006063953	coiled-coil domain-containing protein 151 isoform X3	CCDC151.1	2.45	4.785	2	1	2	1	1	506	58.7	8.6
XP_006045164	complement C3	C3	0.64	6.963	3	2	7	2	1	1661	187.3	6.86
XP_006063582	complement component C9	C9	3.49	4.264	2	1	2	1	1	552	62.4	6
XP_006041938	complement factor B	CFB	3.08	12.597	3	3	14	3	1	761	85.4	7.68
XP_025141925	complement factor H isoform X1	LOC102416626.2	2.45	30.032	7	7	27	7	1	1021	116.1	7.56
XP_025141916	complement factor H isoform X1	LOC102394267	3.32	82.286	17	21	96	21	1	1239	140.3	6.58
XP_025141926	complement factor H isoform X2	LOC102416626.1	2.75	35.912	8	8	29	8	1	991	112.6	7.46
XP_025141918	complement factor H isoform X2	LOC102394267.1	3.32	82.286	17	21	96	21	1	1181	133.9	6.76
XP_025141927	complement factor H isoform X3	LOC102416626	2.45	30.032	8	7	27	7	1	963	109.3	7.47
XP_025141919	complement factor H isoform X3	LOC102394267.3	3.29	68.722	16	20	73	20	1	1181	133.7	6.86
XP_025141928	complement factor H isoform X4	LOC102416626.5	2.64	25.957	7	6	26	6	1	902	102.6	7.42
XP_025141920	complement factor H isoform X4	LOC102394267.7	3.34	79.46	17	20	89	20	1	1179	133.6	6.89
XP_025141929	complement factor H isoform X5	LOC102416626.3	2.45	30.032	8	7	27	7	1	897	101.5	7.34
XP_025141921	complement factor H isoform X5	LOC102394267.6	3.26	66.482	16	19	68	19	1	1122	127.2	6.64
XP_025141930	complement factor H isoform X6	LOC102416626.4	3.26	66.482	16	19	68	19	1	1122	126.9	6.8
XP_025141922	complement factor H isoform X6	LOC102394267.4	2.07	27.205	8	6	20	6	1	778	88.5	7.74
XP_025141923	complement factor H isoform X7	LOC102394267.5	3.26	66.482	17	19	68	19	1	1064	120.7	6.93
XP_025141924	complement factor H isoform X8	LOC102394267.2	2.45	28.864	11	7	23	7	1	630	71.5	7.71
XP_006052270	complement factor I	CFI	4.19	7.462	4	2	9	2	1	618	68.9	7.74
XP_025127559	creatine kinase B-type	CKB	3.71	5.524	3	1	6	1	1	381	42.7	5.78
XP_006054757	C-type natriuretic peptide	NPPC	6.08	69.774	56	8	120	8	1	126	13.3	10.2
XP_006080459	CUB and zona pellucida-like domain-containing protein 1	CUZD1	1.66	2.963	7	1	3	1	1	124	13.8	6.27
XP_025134135	cullin-3 isoform X1	CUL3.2	2.45	2.785	1	1	1	1	1	784	90.7	8.48
XP_006049573	cullin-3 isoform X2	CUL3.1	2.45	2.785	1	1	1	1	1	768	88.9	8.48
XP_025134136	cullin-3 isoform X3	CUL3.4	2.45	2.785	1	1	1	1	1	718	82.9	8.51
XP_025134137	cullin-3 isoform X4	CUL3.3	2.45	2.785	1	1	1	1	1	712	82.3	7.96
XP_006049575	cullin-3 isoform X5	CUL3	2.45	2.785	1	1	1	1	1	702	81.1	8.51
XP_025150664	cyclic GMP-AMP synthase isoform X1	CGAS.2	2.99	2.094	2	1	1	1	1	513	57.5	9.39
XP_025150665	cyclic GMP-AMP synthase isoform X2	CGAS	2.99	2.094	2	1	1	1	1	499	55.9	9.48
XP_025150666	cyclic GMP-AMP synthase isoform X3	CGAS.1	2.99	2.094	3	1	1	1	1	432	48.4	9.13
XP_006046502	cylicin-2 isoform X1	CYLC2.1	1.9	3.228	3	1	2	1	1	458	50.4	9.73
XP_025137941	cylicin-2 isoform X2	CYLC2	1.9	3.228	3	1	2	1	1	374	41.6	9.76
XP_006056492	cystatin-M	CST6	5.28	73.537	29	6	60	6	1	149	16.4	7.74
XP_006050776	cysteine-rich secretory protein 1	CRISP1	4.64	78.345	20	8	72	8	1	247	28.1	6.86
XP_006050774	cysteine-rich secretory protein 3	LOC102394104	5.66	16.624	14	3	26	3	1	244	27.5	8.28
XP_025130069	cytochrome c 2	LOC112581627	2.57	6.06	15	1	2	1	1	105	11.7	9.44
XP_006063995	cytosol aminopeptidase	LAP3	1.47	3.889	3	1	1	1	1	519	56.3	6.64
XP_025117313	cytosolic 5'-nucleotidase 1B isoform X1	LOC102406031	4.54	53.51	14	9	57	9	1	625	71.1	8.85
XP_006054375	cytosolic 5'-nucleotidase 1B isoform X2	LOC102406031	4.52	62.806	19	11	64	11	1	564	64	8.51
XP_006064717	cytosolic non-specific dipeptidase	CNDP2	2.11	5.638	4	1	2	1	1	475	52.6	6
XP_006041443	deoxyribonuclease gamma	DNASE1L3	3.27	34.995	21	6	13	6	1	305	34.9	9.25
XP_025136708	diazepam-binding inhibitor-like 5	LOC102397816	2.55	9.746	23	2	17	2	1	87	9.8	7.91
XP_006046486	dihydrolipoyl dehydrogenase, mitochondrial	DLD	-0.37	1.651	2	1	1	1	1	509	54.2	7.68
XP_025123310	disintegrin and metalloproteinase domain-containing protein 1a-like	LOC112579918	3.47	63.788	10	9	47	9	1	808	90	6.14
XP_025137116	disintegrin and metalloproteinase domain-containing protein 20-like	LOC112583833	3.35	62.845	12	9	69	9	1	761	86.3	7.08
XP_025137114	disintegrin and metalloproteinase domain-containing protein 20-like	LOC112583832	4.07	29.211	4	4	41	4	1	762	86	7.34
XP_025137117	disintegrin and metalloproteinase domain-containing protein 20-like	LOC112583834	4.07	29.211	4	4	41	4	1	761	86.3	7.55
XP_025126570	disintegrin and metalloproteinase domain-containing protein 20-like	LOC112580657	4.62	2.746	1	1	3	1	1	730	82.3	7.42
XP_006040113	disintegrin and metalloproteinase domain-containing protein 20-like	LOC102408768	4.62	2.746	1	1	3	1	1	730	82	7.31
XP_025137666	disintegrin and metalloproteinase domain-containing protein 7 isoform X1	ADAM7.1	3.08	6.218	1	2	6	2	1	802	91.1	6.76
XP_006069596	disintegrin and metalloproteinase domain-containing protein 7 isoform X2	ADAM7	3.08	6.218	1	2	6	2	1	780	88.5	6.67
XP_025122222	dnaJ homolog subfamily B member 13	DNAJB13	3.22	1.834	3	1	2	1	1	316	36.1	7.85
XP_006069475	double-headed protease inhibitor, submandibular gland-like	LOC102400278	4.41	54.369	68	8	105	8	1	144	15.8	6.48
XP_025119098	double-stranded RNA-binding protein Staufen homolog 1 isoform X1	STAU1.1	3.09	10.234	4	2	3	2	1	677	74	9.45
XP_025119099	double-stranded RNA-binding protein Staufen homolog 1 isoform X2	STAU1.6	3.75	13.205	6	3	9	3	1	671	73.4	9.45
XP_025119101	double-stranded RNA-binding protein Staufen homolog 1 isoform X4	STAU1.2	3.09	10.234	5	2	3	2	1	583	63.5	9.38
XP_025119102	double-stranded RNA-binding protein Staufen homolog 1 isoform X5	STAU1.4	3.75	13.205	7	3	9	3	1	577	62.9	9.38
XP_025119105	double-stranded RNA-binding protein Staufen homolog 1 isoform X6	STAU1.3	3.09	10.234	6	2	3	2	1	502	55.4	9.47
XP_025119106	double-stranded RNA-binding protein Staufen homolog 1 isoform X7	STAU1.5	3.75	13.205	8	3	9	3	1	496	54.7	9.47
XP_025139615	dynactin subunit 2 isoform X1	DCTN2.3	3.55	8.612	9	3	11	3	1	408	44.9	5.16
XP_025139616	dynactin subunit 2 isoform X2	DCTN2.4	3.55	8.612	9	3	11	3	1	405	44.5	5.16
XP_025139617	dynactin subunit 2 isoform X3	DCTN2.5	3.55	8.612	9	3	11	3	1	403	44.3	5.21
XP_025139618	dynactin subunit 2 isoform X4	DCTN2	2.97	5.211	7	2	2	2	1	402	44.4	6.61
XP_025139620	dynactin subunit 2 isoform X5	DCTN2.2	2.97	5.211	7	2	2	2	1	389	42.8	6.13
XP_025139621	dynactin subunit 2 isoform X6	DCTN2.1	2.97	5.211	7	2	2	2	1	387	42.6	6.13
XP_025126384	dynein heavy chain 8, axonemal	DNAH8	3.77	11.937	1	4	6	4	1	4723	540.1	6.04
XP_006060517	dynein intermediate chain 1, axonemal	DNAI1	3.88	35.206	6	3	14	3	1	701	79.8	6.61
XP_025135196	dynein intermediate chain 2, axonemal	DNAI2	4.1	5.221	2	1	3	1	1	616	70	4.92
XP_025133673	dynein intermediate chain 2, axonemal-like	LOC112582867	4.1	5.221	2	1	3	1	1	616	70	4.92
XP_025138628	dynein light chain 4, axonemal isoform X1	DNAL4.3	2.56	2.839	6	1	4	1	1	134	14.6	6.52
XP_025138630	dynein light chain 4, axonemal isoform X2	DNAL4.2	2.56	2.839	6	1	4	1	1	126	14.3	5.06
XP_025138631	dynein light chain 4, axonemal isoform X3	DNAL4.1	2.56	2.839	7	1	4	1	1	121	13.5	7.34
XP_006071368	dynein light chain 4, axonemal isoform X4	DNAL4	2.56	2.839	8	1	4	1	1	105	12	5.49
XP_006042013	dynein light chain roadblock-type 2 isoform X1	DYNLRB2.1	2.89	5.137	13	1	3	1	1	96	10.8	7.44
XP_025124222	dynein light chain roadblock-type 2 isoform X2	DYNLRB2	2.89	5.137	16	1	3	1	1	76	8.6	7.34
XP_006069365	dynein regulatory complex subunit 5 isoform X1	TCTE1.1	2.9	6.995	5	1	2	1	1	546	59.8	7.2
XP_006069366	dynein regulatory complex subunit 5 isoform X2	TCTE1	2.9	6.995	5	1	2	1	1	502	55.4	6.8
XP_025128137	dystroglycan	DAG1	2.97	7.5	2	2	4	2	1	895	97.2	8.76
XP_006061689	E3 ubiquitin-protein ligase PPP1R11 isoform X1	PPP1R11	3	5.403	21	1	3	1	1	126	13.9	6.77
XP_006061690	E3 ubiquitin-protein ligase PPP1R11 isoform X2	PPP1R11.1	3	5.403	25	1	3	1	1	107	12	8.12
XP_025145660	ecto-ADP-ribosyltransferase 3 isoform X2	ART3	4.21	1.838	3	1	1	1	1	416	47.1	5.52
XP_025122254	ecto-ADP-ribosyltransferase 5-like isoform X1	LOC102399593.2	3.98	16.785	13	3	21	3	1	310	33.9	7.09
XP_025122255	ecto-ADP-ribosyltransferase 5-like isoform X2	LOC102399593.1	3.98	16.785	13	3	21	3	1	309	33.8	7.09
XP_025122256	ecto-ADP-ribosyltransferase 5-like isoform X3	LOC102399593	3.98	16.785	13	3	21	3	1	298	32.8	6.21
XP_025120743	ectonucleotide pyrophosphatase/phosphodiesterase family member 2 isoform X1	ENPP2.5	-0.76	3.919	1	1	3	1	1	970	110.6	8.47
XP_006074766	ectonucleotide pyrophosphatase/phosphodiesterase family member 2 isoform X10	ENPP2.7	-0.76	3.919	1	1	3	1	1	863	98.8	7.15
XP_025120744	ectonucleotide pyrophosphatase/phosphodiesterase family member 2 isoform X2	ENPP2.1	-0.76	3.919	1	1	3	1	1	961	110.3	7.91
XP_025120745	ectonucleotide pyrophosphatase/phosphodiesterase family member 2 isoform X3	ENPP2.9	-0.76	3.919	1	1	3	1	1	954	109.4	8.13
XP_025120746	ectonucleotide pyrophosphatase/phosphodiesterase family member 2 isoform X4	ENPP2	-0.76	3.919	1	1	3	1	1	945	107.7	8.35
XP_025120747	ectonucleotide pyrophosphatase/phosphodiesterase family member 2 isoform X5	ENPP2.8	-0.76	3.919	1	1	3	1	1	940	107.9	8.16
XP_025120748	ectonucleotide pyrophosphatase/phosphodiesterase family member 2 isoform X6	ENPP2.2	-0.76	3.919	1	1	3	1	1	930	106.7	8.05
XP_025120749	ectonucleotide pyrophosphatase/phosphodiesterase family member 2 isoform X7	ENPP2.6	-0.76	3.919	1	1	3	1	1	918	104.4	7.87
XP_006074764	ectonucleotide pyrophosphatase/phosphodiesterase family member 2 isoform X8	ENPP2.4	-0.76	3.919	1	1	3	1	1	915	105	8.03
XP_006074765	ectonucleotide pyrophosphatase/phosphodiesterase family member 2 isoform X9	ENPP2.3	-0.76	3.919	1	1	3	1	1	888	101.7	7.37
XP_025150311	ectonucleotide pyrophosphatase/phosphodiesterase family member 3 isoform X1	ENPP3	5.33	3.421	1	1	4	1	1	874	99.5	6.01
XP_025150312	ectonucleotide pyrophosphatase/phosphodiesterase family member 3 isoform X2	ENPP3.1	5.33	3.421	2	1	4	1	1	709	81.1	6.14
XP_006080548	endophilin-B1 isoform X1	SH3GLB1.3	3.23	7.758	6	2	4	2	1	402	45.2	6.35
XP_006080549	endophilin-B1 isoform X2	SH3GLB1.2	3.23	7.758	6	2	4	2	1	394	44.2	6.57
XP_006080550	endophilin-B1 isoform X3	SH3GLB1.1	3.23	7.758	6	2	4	2	1	386	43.2	5.82
XP_006080551	endophilin-B1 isoform X4	SH3GLB1	3.23	7.758	7	2	4	2	1	365	40.8	6.2
XP_006049327	endoplasmic reticulum chaperone BiP	HSPA5	3.11	23.784	15	7	12	6	1	655	72.4	5.16
XP_006077264	endoplasmin	HSP90B1	2.85	4.525	2	2	8	2	1	804	92.4	4.84
XP_006060963	ephrin-A1	EFNA1	1.35	5.894	5	2	6	2	1	205	23.9	7.18
XP_006066928	epididymal secretory glutathione peroxidase	LOC102415716	3.8	3.181	5	1	5	1	1	219	25	7.42
XP_006067490	epididymal sperm-binding protein 1	ELSPBP1	-0.39	40.36	39	9	113	9	1	223	26	7.8
XP_025118007	epididymal-specific lipocalin-5 isoform X1	LOC102389470	4.61	31.622	15	3	31	3	1	205	22.2	8.18
XP_025118008	epididymal-specific lipocalin-5 isoform X2	LOC102389470.3	4.61	31.622	15	3	31	3	1	204	22.1	8.18
XP_025118009	epididymal-specific lipocalin-5 isoform X3	LOC102389470.2	4.61	31.622	16	3	31	3	1	193	20.9	7.18
XP_025118010	epididymal-specific lipocalin-5 isoform X4	LOC102389470.1	4.61	31.622	17	3	31	3	1	180	19.7	7.53
XP_025146238	epididymis-specific alpha-mannosidase	LOC102396650	1.7	3.63	1	1	5	1	1	1223	139.2	7.74
XP_025119159	eppin	LOC102391237	3.94	26.065	13	4	15	4	1	237	27	8.25
XP_025137198	equatorin isoform X4	EQTN	3.83	16.183	8	2	45	2	1	318	35.7	4.58
XP_025151254	exocyst complex component 5 isoform X1	EXOC5	-3.82	1.996	3	1	4	1	1	740	85.1	6.87
XP_006048751	exocyst complex component 5 isoform X2	EXOC5.1	-3.82	1.996	3	1	4	1	1	708	81.8	6.71
XP_025146024	extracellular superoxide dismutase [Cu-Zn] isoform X1	SOD3.1	5.04	69.531	39	8	66	8	1	262	28.5	8.51
XP_006041541	extracellular superoxide dismutase [Cu-Zn] isoform X2	SOD3	5.04	69.531	42	8	66	8	1	241	26.2	7.28
XP_025150114	ezrin	EZR	3.95	33.714	10	6	25	6	1	581	68.7	6.42
XP_025134621	F-actin-capping protein subunit beta isoform X1	CAPZB.2	1.14	2.32	3	1	1	1	1	306	34.4	6.06
XP_006068164	F-actin-capping protein subunit beta isoform X2	CAPZB.1	1.14	2.32	3	1	1	1	1	301	33.7	6.43
XP_025134622	F-actin-capping protein subunit beta isoform X3	CAPZB	1.14	2.32	3	1	1	1	1	277	31.3	5.72
XP_006058681	fetuin-B	FETUB	4.09	64.918	36	9	107	9	1	387	42.5	5.77
XP_006045426	fibronectin type III domain-containing protein 8 isoform X1	FNDC8.1	-0.57	8.181	6	1	2	1	1	321	35.4	5.76
XP_025136871	fibronectin type III domain-containing protein 8 isoform X2	FNDC8	-0.57	8.181	6	1	2	1	1	312	34.3	5.43
XP_025127145	fibrous sheath CABYR-binding protein	FSCB	4.65	16.607	6	3	15	3	1	747	80.2	4.06
XP_025138473	fibulin-1 isoform X1	FBLN1.1	5.81	17.454	7	4	24	4	1	706	77.6	5.06
XP_025138474	fibulin-1 isoform X2	FBLN1	5.64	14.17	5	3	21	3	1	686	75	5.07
XP_025122250	folate receptor alpha	LOC102390798	3.47	15.589	12	3	29	3	1	241	28.1	8.09
XP_006064763	folate receptor beta isoform X1	FOLR2	3.47	7.53	4	1	10	1	1	286	33	7.17
XP_006064764	folate receptor beta isoform X2	FOLR2.1	3.47	7.53	4	1	10	1	1	253	29.3	7.64
XP_006064766	folate receptor beta isoform X3	FOLR2.2	3.47	7.53	4	1	10	1	1	249	28.8	7.81
XP_025133608	four and a half LIM domains protein 1, partial	LOC102406359	3.16	20.812	8	2	11	2	1	424	47.3	8.88
XP_025133632	four and a half LIM domains protein 1, partial	LOC102395439	3.16	20.812	9	2	11	2	1	368	41.3	8.88
NP_001306727	fructose-1,6-bisphosphatase 1	FBP1	2.09	8.127	7	2	3	2	1	338	36.7	7.68
NP_001277795	fructose-1,6-bisphosphatase isozyme 2	FBP2	1.79	3.682	3	1	1	1	1	339	36.7	7.66
XP_006070551	fructose-bisphosphate aldolase A isoform X1	ALDOA	2.57	27.562	9	5	14	5	1	416	45.1	8.28
XP_006070553	fructose-bisphosphate aldolase A isoform X2	ALDOA.1	2.57	27.562	10	5	14	5	1	364	39.4	8.19
XP_006058332	furin	FURIN	2.09	11.664	7	2	4	2	1	797	87.4	6.64
XP_006065912	gamma-enolase	ENO2	0.42	8.123	4	1	8	1	1	434	47.2	5.07
XP_006045228	GDP-L-fucose synthase isoform X1	TSTA3	1.98	4.692	4	1	5	1	1	321	36	6.71
XP_025120699	GDP-L-fucose synthase isoform X2	TSTA3.1	1.98	4.692	4	1	5	1	1	278	31.2	6.7
XP_025138143	gelsolin isoform X1	GSN	4.13	17.919	14	7	17	7	1	780	85.5	6.32
XP_025138144	gelsolin isoform X2	GSN.2	4.13	17.919	14	7	17	7	1	742	81.9	5.78
XP_025138145	gelsolin isoform X3	GSN.1	4.13	17.919	15	7	17	7	1	731	80.7	5.77
XP_025134134	glia-derived nexin	SERPINE2	4.45	18.163	15	6	30	6	1	397	43.8	9.52
XP_006044440	GLIPR1-like protein 1 isoform X1	GLIPR1L1.1	-0.04	12.565	15	5	22	5	1	241	27.2	8.66
XP_025140225	GLIPR1-like protein 1 isoform X2	GLIPR1L1	-0.04	12.565	18	5	22	5	1	197	22.6	9.25
XP_025149249	glucosidase 2 subunit beta isoform X1	PRKCSH.1	2.18	3.594	2	1	4	1	1	534	60.3	4.45
XP_025149250	glucosidase 2 subunit beta isoform X2	PRKCSH	2.18	3.594	2	1	4	1	1	533	60.1	4.45
XP_025123032	glutathione hydrolase 1 proenzyme isoform X1	LOC102412993	3.7	2.154	2	1	2	1	1	568	60.8	6.37
XP_006066929	glutathione peroxidase 6	GPX6	3.8	3.181	5	1	5	1	1	221	25.1	7.77
XP_006065862	glyceraldehyde-3-phosphate dehydrogenase	GAPDH	4.52	10.828	10	2	10	1	1	333	35.9	8.35
XP_006068868	glyceraldehyde-3-phosphate dehydrogenase, testis-specific	GAPDHS	0.76	35.338	26	6	27	5	1	401	43.9	8.44
XP_025121366	glycosyl-phosphatidylinositol-anchored molecule-like protein	LOC112579230	3.94	2.271	3	1	3	1	1	263	29.6	8.73
XP_025121370	glycosyl-phosphatidylinositol-anchored molecule-like protein isoform X1	LOC112579232.1	3.94	2.271	3	1	3	1	1	290	32	9
XP_025121371	glycosyl-phosphatidylinositol-anchored molecule-like protein isoform X2	LOC112579232	3.94	2.271	3	1	3	1	1	263	29.6	8.79
XP_025136699	glyoxalase domain-containing protein 4 isoform X1	GLOD4	1.34	4.989	4	1	1	1	1	339	38.3	6.68
XP_006052771	glyoxalase domain-containing protein 4 isoform X2	GLOD4.1	1.34	4.989	4	1	1	1	1	298	33.4	5.77
XP_025144376	Golgi integral membrane protein 4 isoform X1	GOLIM4.3	-1.79	1.584	2	1	2	1	1	695	81.2	4.82
XP_025144380	Golgi integral membrane protein 4 isoform X2	GOLIM4.1	-1.79	1.584	2	1	2	1	1	694	81.1	4.82
XP_025144386	Golgi integral membrane protein 4 isoform X3	GOLIM4	-1.79	1.584	2	1	2	1	1	667	78.1	4.79
XP_025144391	Golgi integral membrane protein 4 isoform X4	GOLIM4.2	-1.79	1.584	2	1	2	1	1	666	78	4.79
XP_025137756	Golgi membrane protein 1	GOLM1	3.89	17.754	14	3	16	3	1	405	45.5	4.84
XP_006060609	granulins	GRN	1.98	4.44	3	1	2	1	1	587	62.9	7.28
NP_001277908	haptoglobin precursor	HP	1.18	3.595	3	1	1	1	1	401	44.9	7.56
XP_006068864	HAUS augmin-like complex subunit 5	HAUS5	5.16	1.391	1	1	3	0	2	633	71.5	7.17
XP_006041955	heat shock 70 kDa protein 1A	LOC102409533	2.68	14.617	6	3	25	2	1	641	70.2	5.92
XP_006041952	heat shock 70 kDa protein 1-like	HSPA1L	3.36	45.799	18	8	45	5	1	641	70.3	6.2
XP_006067363	heat shock 70 kDa protein 4L isoform X1	HSPA4L.1	4.47	7.586	2	2	5	2	1	1023	115.4	5.4
XP_025123823	heat shock 70 kDa protein 4L isoform X2	HSPA4L	4.47	7.586	3	2	5	2	1	840	94.8	5.76
XP_006072590	heat shock cognate 71 kDa protein	HSPA8	3.68	13.885	7	3	22	1	1	650	71.2	5.52
XP_006057191	heat shock protein beta-1	HSPB1	5.92	12.552	8	1	6	1	1	201	22.4	6.4
XP_025135916	heat shock protein beta-9	HSPB9	4.12	9.567	21	3	16	3	1	157	16.9	8.21
XP_025127285	heat shock protein HSP 90-alpha	HSP90AA1	2.57	21.439	9	6	17	6	1	733	84.7	5.01
XP_006069362	heat shock protein HSP 90-beta	HSP90AB1	2.78	2.646	1	1	4	1	1	724	83.2	5.03
XP_006072201	heat shock-related 70 kDa protein 2	HSPA2	2.89	67.003	25	15	64	12	1	636	69.8	5.67
XP_006042170	hemopexin	HPX	2.52	5.871	3	1	8	1	1	459	52	7.28
XP_025147060	heterogeneous nuclear ribonucleoproteins A2/B1 isoform X1	HNRNPA2B1.2	2.08	9.715	7	1	4	1	1	353	37.4	8.95
XP_006045808	heterogeneous nuclear ribonucleoproteins A2/B1 isoform X1	LOC102389038.1	2.08	9.715	7	1	4	1	1	341	36	8.65
XP_006045809	heterogeneous nuclear ribonucleoproteins A2/B1 isoform X2	LOC102389038	2.08	9.715	8	1	4	1	1	301	32.5	8.72
XP_025147061	heterogeneous nuclear ribonucleoproteins A2/B1 isoform X3	HNRNPA2B1	2.08	9.715	8	1	4	1	1	313	33.9	9.03
XP_025147062	heterogeneous nuclear ribonucleoproteins A2/B1 isoform X4	HNRNPA2B1.1	2.08	9.715	9	1	4	1	1	292	31.9	9.19
XP_006072721	histidine triad nucleotide-binding protein 1	HINT1	3.25	7.505	17	2	10	2	1	126	13.8	6.79
XP_006064441	histidine triad nucleotide-binding protein 2, mitochondrial isoform X1	HINT2.1	2.42	6.638	18	2	6	2	1	163	17.2	8.88
XP_025137484	histidine triad nucleotide-binding protein 2, mitochondrial isoform X2	HINT2	2.42	6.638	19	2	6	2	1	151	16.5	9.33
XP_006042639	histidine triad nucleotide-binding protein 3 isoform X1	HINT3	2.55	18.597	26	4	12	4	1	217	24.2	7.28
XP_006042640	histidine triad nucleotide-binding protein 3 isoform X2	HINT3.1	2.55	18.597	31	4	12	4	1	182	20.5	6.6
XP_025150581	histidine triad nucleotide-binding protein 3 isoform X3	HINT3.2	2.34	3.094	6	1	2	1	1	156	17.9	8.15
XP_006048090	histone H1.1	LOC102390920	3.8	7.46	11	2	5	2	1	215	21.7	10.86
XP_006048088	histone H1.2	LOC102390145	3.17	19.755	23	5	25	5	1	213	21.4	11
XP_006048076	histone H1.3	LOC102412313	3.17	19.755	22	5	25	5	1	221	22.2	10.96
XP_006048065	histone H1.4	LOC102408803	3.17	19.755	22	5	25	5	1	219	21.9	11.03
XP_006048070	histone H1.4-like	LOC102410341	3.17	10.346	17	3	6	3	1	210	21.3	10.9
XP_025151801	histone H1.5	LOC102410659	3.17	2.886	5	1	1	1	1	226	22.7	10.92
XP_025151956	histone H2A type 1	LOC112587908	-0.56	14.023	30	3	24	2	1	130	14.1	10.9
XP_006048086	histone H2A type 1-B/E	LOC102389168	-0.56	11.111	22	2	23	1	1	130	14.1	11.05
XP_006048081	histone H2A type 1-C	LOC102414630	-0.56	11.111	22	2	23	1	1	130	14.1	11.05
XP_025151913	histone H2A type 1-D	LOC112587905	-0.56	14.023	30	3	24	2	1	130	14.1	10.9
XP_025152105	histone H2A type 1-D-like	LOC102389822	-0.56	11.111	23	2	23	1	1	121	13.1	11.02
XP_006048063	histone H2A type 1-H	LOC102408136	-0.56	14.023	30	3	24	2	1	128	13.9	10.89
XP_025151963	histone H2A type 1-J	LOC102400351	-0.56	14.023	30	3	24	2	1	128	13.9	10.89
XP_006049262	histone H2A type 2-A	LOC102413094	-0.56	14.023	30	3	24	2	1	130	14.1	10.9
XP_006049267	histone H2A type 2-B	LOC102415072	0.92	3.71	7	1	17	0	2	130	14	10.89
XP_006049266	histone H2A type 2-C	LOC102414738	-0.56	14.023	30	3	24	2	1	129	14	10.9
XP_006063276	histone H2A type 3	LOC102404666	-0.56	11.111	20	2	23	1	1	140	15.3	10.56
XP_006055195	histone H2A.J	LOC102402131	-0.56	14.023	30	3	24	2	1	129	14	10.9
XP_025147126	histone H2A.V	LOC102395706	-1.13	9.374	18	2	21	1	1	128	13.5	10.58
XP_006066107	histone H2A.Z	LOC102400686	-1.13	9.374	18	2	21	1	1	128	13.4	10.45
XP_025146175	histone H2A.Z	LOC102409148	-1.13	9.374	18	2	21	1	1	128	13.5	10.58
XP_006078744	histone H2AX	LOC102392520	0.92	3.71	6	1	17	0	2	143	15.1	10.74
XP_006048078	histone H2B type 1	LOC102413318	1.61	9.636	21	3	17	3	1	126	13.9	10.32
XP_006051280	histone H2B type 1-A	LOC102394425	1.61	9.636	21	3	17	3	1	127	14.2	10.24
XP_006048087	histone H2B type 1-B	LOC102389499	1.61	9.636	21	3	17	3	1	126	13.9	10.32
XP_025120517	histone H2B type 1-F/J/L-like	LOC102404200	2	1.729	8	1	8	1	1	93	10.4	10.18
XP_006048062	histone H2B type 1-J-like	LOC102407809	1.61	9.636	21	3	17	3	1	126	13.9	10.32
XP_025152033	histone H2B type 1-K	LOC102408478	1.61	9.636	21	3	17	3	1	126	13.9	10.32
XP_025152060	histone H2B type 1-like	LOC102410005	1.61	9.636	21	3	17	3	1	126	13.9	10.32
XP_006048073	histone H2B type 1-like	LOC102411322	1.61	9.636	21	3	17	3	1	126	13.9	10.32
XP_025149113	histone H2B type 1-like	LOC102410329	1.76	7.907	16	2	9	2	1	125	13.9	10.21
XP_006076308	histone H2B type 1-like	LOC102412582	2.13	4.748	13	2	14	2	1	126	13.9	10.1
XP_025136898	histone H2B type 1-like	LOC112583797	2.13	4.748	13	2	14	2	1	126	13.8	10.07
XP_025127773	histone H2B type 1-like	LOC102408153	2.13	4.748	13	2	14	2	1	126	13.8	10.11
XP_025145140	histone H2B type 1-like	LOC102392042	2.13	4.748	14	2	14	2	1	116	12.8	10.36
XP_006042841	histone H2B type 1-like	LOC102398832	2.13	4.748	13	2	14	2	1	126	13.7	10.17
XP_006066860	histone H2B type 1-like	LOC102392466	2.13	4.748	13	2	14	2	1	126	14	10.37
XP_025146655	histone H2B type 1-like isoform X1	LOC102413516	1.76	7.907	15	2	9	2	1	136	14.9	9.83
XP_006065981	histone H2B type 1-like isoform X2	LOC102413516.1	1.76	7.907	15	2	9	2	1	133	14.8	10.1
XP_025135696	histone H2B type 1-L-like	LOC112583653	1.46	4.887	9	1	3	1	1	126	13.9	10.13
XP_025150009	histone H2B type 1-L-like	LOC112587290	1.61	9.636	17	3	17	3	1	158	18.2	10.23
XP_025152011	histone H2B type 1-M	LOC102409122	1.61	9.636	21	3	17	3	1	126	13.9	10.32
XP_006045701	histone H2B type 1-N	LOC102409993	1.61	9.636	21	3	17	3	1	126	13.9	10.32
XP_025134943	histone H2B type 1-N-like	LOC102400687	1.46	4.887	7	1	3	1	1	147	15.8	9.99
XP_025128907	histone H2B type 1-N-like	LOC112581359	1.58	6.616	14	2	11	2	1	125	13.9	10.24
XP_006049265	histone H2B type 2-E	LOC102414399	1.61	9.636	21	3	17	3	1	126	13.9	10.32
XP_006063813	histone H2B type 2-E-like	LOC102393518	1.46	4.887	7	1	3	1	1	166	18.2	9.73
XP_025143733	histone H2B type 2-E-like	LOC102413428	1.61	9.636	21	3	17	3	1	126	13.9	10.32
XP_006046626	histone H2B type 2-E-like	LOC102408128	1.61	9.636	19	3	17	3	1	145	16	9.94
XP_006079668	histone H2B type 2-E-like	LOC102395743	1.76	7.907	16	2	9	2	1	126	13.9	10.13
XP_006049257	histone H2B type 2-F	LOC102411450	1.61	9.636	21	3	17	3	1	126	13.9	10.32
XP_006063275	histone H2B type 3-B	LOC102404341	1.76	7.907	16	2	9	2	1	126	13.9	10.32
XP_006077823	histone H2B type F-S-like	LOC102389641	1.46	4.887	7	1	3	1	1	161	17.2	9.73
XP_025151884	histone H3.1-like	LOC102394835	-2.27	3.756	11	2	17	0	2	132	14.9	10.7
XP_025152210	histone H3.1-like	LOC102409669	-0.81	19.647	22	6	28	4	1	218	24.4	11.11
XP_006046136	histone H3.3	LOC102406199	-2.27	3.756	10	2	17	0	2	136	15.3	11.27
XP_025121222	histone H3.3C	LOC102402179	-2.27	3.756	10	2	17	0	2	136	15.4	11.49
XP_006062480	histone H3.3C-like	LOC102395983	-3.3	1.734	5	1	4	0	2	136	15.7	11.34
XP_025126790	histone H3.3-like	LOC112580793	-2.27	3.756	10	2	17	0	2	136	15.2	11.14
XP_006054995	histone H3.3-like	LOC102396450	-2.27	3.756	10	2	17	0	2	136	15.2	10.84
XP_025147992	histone H3.3-like	LOC102410792	-2.27	3.756	10	2	17	0	2	136	15.3	10.99
XP_025132316	histone H3.3-like	LOC112582190	-2.27	3.756	10	2	17	0	2	136	15.4	11.12
XP_006080628	histone H3.3-like	LOC102399019	-0.81	2.022	5	1	13	0	2	136	15.2	11.14
XP_025128153	histone H3.3-like, partial	LOC102414870	-2.27	3.756	10	2	17	0	2	141	15.7	11.12
XP_025143734	histone H4	LOC102412113	-0.15	15.891	33	4	11	4	1	103	11.4	11.36
XP_025149897	histone H4-like	LOC102391078	-2.65	2.181	8	1	4	1	1	99	10.9	10.52
XP_006067791	histone H4-like	LOC102414837	-0.15	9.131	20	3	9	3	1	103	11.3	11.22
XP_025124939	hormone-sensitive lipase isoform X1	LIPE	4.47	48.213	15	9	52	9	1	1042	114.5	6.98
XP_006041291	hormone-sensitive lipase isoform X2	LIPE.2	3.06	6.007	2	1	4	1	1	802	88	8.05
XP_006041293	hormone-sensitive lipase isoform X3	LIPE.1	3.06	6.007	3	1	4	1	1	756	82.5	6.92
XP_025138590	hsc70-interacting protein isoform X1	ST13.1	3.22	5.172	4	1	1	1	1	375	42	5.33
XP_006071332	hsc70-interacting protein isoform X2	ST13	3.22	5.172	4	1	1	1	1	369	41.4	5.31
XP_006060645	hyaluronidase PH-20 isoform X1	LOC102411950	-3.57	38.037	18	9	40	9	1	552	62.1	8.41
XP_025147242	hyaluronidase PH-20 isoform X2	LOC102411950.1	-3.57	38.037	19	9	40	9	1	522	59.1	8.54
XP_006072867	hyaluronidase PH-20-like	LOC102390833	-4.41	1.471	1	1	3	1	1	549	62.4	8.91
XP_006076917	hydroxyacylglutathione hydrolase, mitochondrial	HAGH	4.16	5.153	5	1	1	1	1	308	34.1	8.05
XP_025122575	hypoxia up-regulated protein 1 isoform X1	HYOU1.1	4.02	6.136	1	1	7	1	1	1001	111.4	5.29
XP_006078738	hypoxia up-regulated protein 1 isoform X2	HYOU1	4.02	6.136	1	1	7	1	1	1002	111.4	5.29
XP_025124892	IgGFc-binding protein isoform X1	FCGBP.1	2.36	18.666	2	4	10	4	1	3001	318.5	5.21
XP_025124893	IgGFc-binding protein isoform X2	FCGBP	2.36	18.666	2	4	10	4	1	2585	274.9	5.06
XP_006069382	immunoglobulin J chain	JCHAIN	5.17	7.451	15	2	13	2	1	158	17.8	5.22
XP_025124026	immunoglobulin lambda-like polypeptide 1	IGLL1	5.13	87.155	14	6	76	6	1	344	36.9	9.96
XP_006076998	immunoglobulin superfamily member 5 isoform X1	IGSF5.1	3.68	5.96	5	2	6	2	1	370	39.7	6.23
XP_006076999	immunoglobulin superfamily member 5 isoform X2	IGSF5	3.68	5.96	6	2	6	2	1	324	34.7	6.43
XP_006074767	inositol monophosphatase 1 isoform X1	IMPA1.1	2.42	5.585	6	1	1	1	1	278	30.2	5.17
XP_006074768	inositol monophosphatase 1 isoform X2	IMPA1	2.42	5.585	6	1	1	1	1	277	30	5.17
XP_006058022	inositol-3-phosphate synthase 1	ISYNA1	2.79	5.876	4	2	3	2	1	557	60.7	6
XP_006046672	insulin-like growth factor-binding protein 6	IGFBP6	4.73	39.662	32	5	24	5	1	237	24.9	8.31
XP_025137332	insulin-like peptide INSL6	LOC102413732	-2.84	2.104	4	1	1	1	1	205	24	9.07
XP_025147622	IQ and AAA domain-containing protein 1-like	IQCA1L	0.77	2.532	1	1	1	1	1	818	94.5	9.09
XP_006045068	IQ domain-containing protein F1	IQCF1	1.75	2.675	8	1	2	1	1	209	24.3	9.99
XP_006043253	isoaspartyl peptidase/L-asparaginase	ASRGL1	3.42	71.636	35	9	81	9	1	308	32	7.4
XP_006041198	izumo sperm-egg fusion protein 4 isoform X1	IZUMO4	-2.01	3.11	6	1	1	1	1	213	24.4	6.71
XP_006041197	izumo sperm-egg fusion protein 4 isoform X2	IZUMO4.1	-2.01	3.11	6	1	1	1	1	207	23.7	6.71
XP_025129760	kazal-type serine protease inhibitor domain-containing protein 1 isoform X1	KAZALD1.1	4.16	3.098	6	1	2	1	1	311	33.7	4.79
XP_025129761	kazal-type serine protease inhibitor domain-containing protein 1 isoform X2	KAZALD1	4.16	3.098	7	1	2	1	1	304	33.1	4.79
XP_025135927	kelch-like protein 10 isoform X1	KLHL10	3.01	4.184	2	1	3	1	1	614	69.5	5.77
XP_006055837	kelch-like protein 10 isoform X2	KLHL10.1	3.01	4.184	2	1	3	1	1	608	68.9	5.77
XP_006041550	keratin, type I cuticular Ha2	KRT32	5.05	2.622	2	1	6	1	1	405	46.5	4.82
XP_006041552	keratin, type I cuticular Ha6	KRT36	5.05	2.622	2	1	6	1	1	456	51.1	5.06
XP_006041559	keratin, type I cuticular Ha8	LOC102393197	5.05	2.622	2	1	6	1	1	444	49.5	4.91
XP_025135946	keratin, type I cytoskeletal 10 isoform X1	KRT10.1	5.05	2.622	1	1	6	1	1	578	60.5	5.12
XP_006068700	keratin, type I cytoskeletal 10 isoform X2	KRT10	5.05	2.622	1	1	6	1	1	538	55.9	5.07
XP_006041554	keratin, type I cytoskeletal 13	KRT13	3.96	6.054	5	2	9	2	1	435	47.3	4.92
XP_006055851	keratin, type I cytoskeletal 14	LOC102398359	5.05	2.622	1	1	6	1	1	477	51.9	5.16
XP_006041555	keratin, type I cytoskeletal 15	KRT15	5.05	2.622	2	1	6	1	1	453	49.1	4.88
XP_006055848	keratin, type I cytoskeletal 17	LOC102397396	5.05	2.622	2	1	6	1	1	440	48.7	5.2
XP_006046668	keratin, type I cytoskeletal 18	KRT18	5.05	2.622	2	1	6	1	1	429	47.9	5.44
XP_006041556	keratin, type I cytoskeletal 19	KRT19	5.05	2.622	2	1	6	1	1	399	43.9	5.01
XP_006068696	keratin, type I cytoskeletal 24 isoform X1	KRT24	5.05	2.622	1	1	6	1	1	525	54.9	4.89
XP_025135949	keratin, type I cytoskeletal 24 isoform X2	KRT24.1	5.05	2.622	2	1	6	1	1	439	47.9	4.92
XP_006043425	keratin, type I cytoskeletal 40	KRT40	5.05	2.622	2	1	6	1	1	431	47.7	4.34
XP_006055849	keratin, type I cytoskeletal 42	LOC102397719	5.05	2.622	2	1	6	1	1	452	50.2	5.21
XP_006041549	keratin, type I microfibrillar 48 kDa, component 8C-1	LOC102389471	5.05	2.622	2	1	6	1	1	416	47.1	4.83
XP_006041548	keratin, type I microfibrillar 48 kDa, component 8C-1-like	LOC102389131	5.05	2.622	2	1	6	1	1	405	45.8	4.82
XP_006046659	keratin, type II cytoskeletal 1	KRT1	4.38	5.132	3	2	9	2	1	614	63.6	8.46
XP_006046658	keratin, type II cytoskeletal 2 epidermal isoform X1	KRT2	4.02	2.239	1	1	1	1	1	617	64.3	8.22
XP_025138245	keratin, type II cytoskeletal 2 epidermal isoform X2	KRT2.1	4.02	2.239	1	1	1	1	1	612	63.9	8.22
XP_006046662	keratin, type II cytoskeletal 4	KRT4	4.02	2.239	2	1	1	1	1	555	58.6	7.55
XP_006046651	keratin, type II cytoskeletal 5	KRT5	1.46	7.897	4	2	11	2	1	595	62.5	7.81
XP_025140017	keratin, type II cytoskeletal 6A	LOC102407869	4.02	2.239	2	1	1	1	1	565	60.3	8.09
XP_025140016	keratin, type II cytoskeletal 6A-like	LOC102408195	4.02	2.239	2	1	1	1	1	565	60.4	8.35
XP_006058536	keratin, type II cytoskeletal 7	KRT7	1.11	4.74	3	1	6	1	1	466	51.7	6.71
XP_025119156	kunitz-type protease inhibitor 4	SPINT4	4.47	29.259	28	3	26	3	1	106	12.1	8.37
NP_001277789	lactotransferrin precursor	LTF	3.33	37.214	11	7	37	6	1	708	77.6	7.99
XP_025141292	laminin subunit gamma-1	LAMC1	2.04	6.656	1	1	3	1	1	1608	177.6	5.17
XP_025122973	large proline-rich protein BAG6 isoform X1	BAG6.3	2.73	1.395	1	1	2	1	1	1164	122.3	5.59
XP_025123025	large proline-rich protein BAG6 isoform X10	BAG6.6	2.73	1.395	1	1	2	1	1	1035	109.7	5.38
XP_025122980	large proline-rich protein BAG6 isoform X2	BAG6.7	2.73	1.395	1	1	2	1	1	1146	120.4	5.69
XP_025122988	large proline-rich protein BAG6 isoform X3	BAG6.2	2.73	1.395	1	1	2	1	1	1138	120	5.59
XP_025122994	large proline-rich protein BAG6 isoform X4	BAG6.8	2.73	1.395	1	1	2	1	1	1128	118.7	5.55
XP_025123000	large proline-rich protein BAG6 isoform X5	BAG6.1	2.73	1.395	1	1	2	1	1	1115	117.1	5.67
XP_025123007	large proline-rich protein BAG6 isoform X6	BAG6	2.73	1.395	1	1	2	1	1	1110	116.8	5.66
XP_025123011	large proline-rich protein BAG6 isoform X7	BAG6.4	2.73	1.395	1	1	2	1	1	1102	116.3	5.55
XP_025123017	large proline-rich protein BAG6 isoform X8	BAG6.9	2.73	1.395	1	1	2	1	1	1097	115.2	5.78
XP_025123021	large proline-rich protein BAG6 isoform X9	BAG6.5	2.73	1.395	1	1	2	1	1	1079	113.5	5.63
XP_025147624	late histone H2B.L4-like	LOC112586636	1.61	3.02	7	1	6	1	1	122	13.6	10.54
XP_025142068	leucine zipper protein 2 isoform X1	LUZP2	2.17	121.511	38	20	137	20	1	350	40.1	6.37
XP_025142069	leucine zipper protein 2 isoform X2	LUZP2.1	2.17	121.511	42	20	137	20	1	318	36.5	8.02
XP_006064816	leucine zipper protein 2 isoform X3	LUZP2.2	2.29	72.445	38	13	98	13	1	264	30.1	5.62
XP_006067176	leucine-rich alpha-2-glycoprotein	LRG1	4.9	7.631	5	1	7	1	1	353	39	6.8
XP_025123675	leucine-rich colipase-like protein 1 isoform X1	LRCOL1.3	2.95	2.803	4	1	2	1	1	206	23.5	8
XP_025123676	leucine-rich colipase-like protein 1 isoform X2	LRCOL1.1	2.95	2.803	4	1	2	1	1	197	22.5	7.99
XP_006078321	leucine-rich colipase-like protein 1 isoform X3	LRCOL1	2.95	2.803	4	1	2	1	1	192	21.8	8.37
XP_025123677	leucine-rich colipase-like protein 1 isoform X4	LRCOL1.2	2.95	2.803	5	1	2	1	1	171	19.7	7.75
XP_025135706	leucine-rich repeat-containing protein 37A3 isoform X1	LOC102416251	3.79	40.22	3	7	50	7	1	2553	280.5	4.93
XP_025135707	leucine-rich repeat-containing protein 37A3 isoform X2	LOC102416251.1	3.79	40.22	3	7	50	7	1	2478	271.8	4.91
XP_025118016	lipocalin-1 isoform X1	LCN1.1	2.7	19.799	29	3	5	3	1	178	19.6	4.73
XP_025118018	lipocalin-1 isoform X2	LCN1	2.34	26.305	41	4	9	4	1	173	19.1	4.7
XP_006056125	L-lactate dehydrogenase C chain isoform X1	LOC102412587	1.36	2.376	3	1	2	1	1	332	35.9	7.71
XP_006044896	LOW QUALITY PROTEIN: acetyl-CoA carboxylase 2	ACACB	2.81	1.916	0	1	2	1	1	2456	276.5	6.4
XP_006058509	LOW QUALITY PROTEIN: actin, aortic smooth muscle	ACTA2	2.38	27.779	16	5	20	5	1	377	42	5.39
XP_025141472	LOW QUALITY PROTEIN: agrin	AGRN	2.24	11.953	2	3	7	3	1	2066	218.7	6.18
XP_025138840	LOW QUALITY PROTEIN: A-kinase anchor protein 3	AKAP3	0.65	26.638	7	5	17	5	1	852	94	6.92
XP_006061741	LOW QUALITY PROTEIN: amyloid-like protein 2	APLP2	4.89	8.39	3	2	3	2	1	764	86.6	4.81
XP_006077629	LOW QUALITY PROTEIN: axonemal dynein light intermediate polypeptide 1	DNALI1	2.71	9.839	12	3	12	3	1	280	31.9	8.68
XP_006067250	LOW QUALITY PROTEIN: calcyphosin	CAPS	1.55	8.87	12	2	5	2	1	189	20.9	4.84
XP_025144170	LOW QUALITY PROTEIN: cAMP-dependent protein kinase catalytic subunit beta	PRKACB	3.4	2.702	3	1	1	1	1	351	40.6	8.56
XP_025133353	LOW QUALITY PROTEIN: cancer/testis antigen 47A-like, partial	LOC112582684	1.81	4.931	12	1	1	1	1	264	28.2	4.36
XP_006050773	LOW QUALITY PROTEIN: cysteine-rich secretory protein 2	CRISP2	2.24	2.081	4	1	3	1	1	244	27.1	7.23
XP_025129709	LOW QUALITY PROTEIN: deleted in malignant brain tumors 1 protein	DMBT1	4.93	25.677	16	3	41	3	1	3206	344.2	5.22
XP_025123308	LOW QUALITY PROTEIN: disintegrin and metalloproteinase domain-containing protein 1a-like	LOC112579917	3.38	58.947	8	8	42	8	1	928	101.1	5.34
XP_025133994	LOW QUALITY PROTEIN: disintegrin and metalloproteinase domain-containing protein 2	ADAM2	4.04	31.63	18	6	11	6	1	745	83	5.44
XP_025134019	LOW QUALITY PROTEIN: disintegrin and metalloproteinase domain-containing protein 32	ADAM32	2.31	63.331	13	8	71	8	1	746	82.4	5.29
XP_025134009	LOW QUALITY PROTEIN: disintegrin and metalloproteinase domain-containing protein 5	LOC102404621	0.62	4.653	2	1	1	1	1	750	83.5	6.74
XP_025133679	LOW QUALITY PROTEIN: dynein intermediate chain 2, axonemal-like, partial	LOC102405091	4.1	5.221	2	1	3	1	1	481	54.7	5.15
XP_025128865	LOW QUALITY PROTEIN: epidermal growth factor receptor	EGFR	6.45	8.452	2	2	5	2	1	1240	137.2	7.44
XP_025129505	LOW QUALITY PROTEIN: fibrous sheath-interacting protein 2	FSIP2	4.27	27.826	1	5	13	5	1	6939	781.4	6.64
XP_006045325	LOW QUALITY PROTEIN: galactokinase	GALK1	3.88	6.007	5	2	7	2	1	392	42.1	5.91
XP_006045360	LOW QUALITY PROTEIN: glutamine-rich protein 2	QRICH2	2.32	11.038	2	2	5	2	1	1817	196.7	6.47
XP_025143731	LOW QUALITY PROTEIN: histone H3-like	LOC102414060	-2.27	3.756	10	2	17	0	2	136	15.4	11.27
XP_006057176	LOW QUALITY PROTEIN: huntingtin-interacting protein 1	HIP1	3.95	69.617	10	11	40	11	1	1037	116.4	5.47
XP_025124049	LOW QUALITY PROTEIN: hydrocephalus-inducing protein homolog	HYDIN	5.27	2.252	0	1	2	1	1	5235	589.2	6.33
XP_025149641	LOW QUALITY PROTEIN: IQ domain-containing protein N	IQCN	3.54	80.732	7	13	45	13	1	3657	377.3	9.33
XP_006041551	LOW QUALITY PROTEIN: keratin, type I cuticular Ha5	KRT35	5.05	2.622	2	1	6	1	1	455	50.4	5
XP_006041558	LOW QUALITY PROTEIN: keratin, type I cuticular Ha8	LOC102392881	5.05	2.622	2	1	6	1	1	430	47.9	5.03
XP_006068701	LOW QUALITY PROTEIN: keratin, type I cytoskeletal 12	KRT12	5.05	2.622	1	1	6	1	1	517	55.6	4.74
XP_025135947	LOW QUALITY PROTEIN: keratin, type I cytoskeletal 28	KRT28	5.05	2.622	1	1	6	1	1	507	55.3	5.73
XP_025140015	LOW QUALITY PROTEIN: keratin, type II cytoskeletal 75	LOC102416114	1.11	4.74	2	1	6	1	1	594	64.3	8.32
XP_006060035	LOW QUALITY PROTEIN: low-density lipoprotein receptor-related protein 2	LRP2	2.99	16.08	1	3	5	3	1	4649	519.3	5.27
XP_006061196	LOW QUALITY PROTEIN: lysyl oxidase homolog 4	LOXL4	3.68	1.812	1	1	3	1	1	759	84.4	7.44
XP_025145318	LOW QUALITY PROTEIN: mucin-2	LOC102400605	6.06	66.121	8	15	235	15	1	2782	287.2	5.39
XP_006069856	LOW QUALITY PROTEIN: oxysterol-binding protein 2	OSBP2	1.3	2.811	3	1	1	1	1	915	101.8	6.76
XP_025150111	LOW QUALITY PROTEIN: radial spoke head protein 3 homolog	RSPH3	2.61	3.633	4	1	2	1	1	603	68.6	6.81
XP_006067549	LOW QUALITY PROTEIN: radial spoke head protein 6 homolog A	RSPH6A	3.06	17.241	8	3	9	3	1	719	81.4	4.39
XP_025139829	LOW QUALITY PROTEIN: RNA polymerase II-associated protein 3	RPAP3	2.91	4.072	2	1	3	1	1	665	75.5	6.2
XP_025152321	LOW QUALITY PROTEIN: seminal ribonuclease-like	LOC102390014	3.33	62.223	26	4	78	3	1	151	16.7	9.39
XP_025127208	LOW QUALITY PROTEIN: serpin A3-8-like	LOC102410741	-1.65	4.809	5	2	2	0	2	418	47.1	5.96
XP_025126388	LOW QUALITY PROTEIN: slit homolog 3 protein	SLIT3	-0.7	6.345	2	2	5	2	1	1523	167.3	7.77
XP_025120488	LOW QUALITY PROTEIN: small integral membrane protein 20-like	LOC102396848	1.71	2.49	14	1	1	1	1	101	11.3	10.68
XP_006069822	LOW QUALITY PROTEIN: solute carrier family 2, facilitated glucose transporter member 3	SLC2A3	4.09	1.962	4	1	5	1	1	494	54.1	7.8
XP_006078164	LOW QUALITY PROTEIN: sperm-associated antigen 11-like	LOC102415447	3.97	22.332	31	4	23	4	1	80	9.3	8.21
XP_006076181	LOW QUALITY PROTEIN: tumor necrosis factor receptor superfamily member 21	TNFRSF21	3.88	4.169	2	1	5	1	1	652	71.3	7.83
XP_025135902	LOW QUALITY PROTEIN: UPF0602 protein C4orf47 homolog	C1H4orf47	1.03	5.703	5	1	1	1	1	309	34.5	9.72
XP_006069410	LOW QUALITY PROTEIN: vitamin D-binding protein	GC	-2.86	126.66	38	19	78	19	1	474	53.3	5.71
XP_025148788	LOW QUALITY PROTEIN: zinc finger protein 474	LOC102399131	2.24	4.138	9	2	6	2	1	454	51	9.47
XP_025131239	LOW QUALITY PROTEIN: zonadhesin	ZAN	-0.18	5.899	1	2	2	2	1	2800	306	6.9
XP_006054541	lysophosphatidylcholine acyltransferase 2B-like	LOC102408396	2.1	3.166	2	1	1	1	1	566	62.7	7.36
NP_001277870	lysozyme C-1-like precursor	LOC102415277	3.46	9.527	14	1	3	1	1	147	16.3	7.2
XP_006064329	lysozyme C-2	LOC102415587	3.46	9.527	14	1	3	1	1	147	16.3	6.51
NP_001277777	lysozyme-like protein 4 precursor	LYZL4	-1.32	14.231	30	3	5	3	1	145	16.3	8.12
XP_006047820	major prion protein-like	PRNP	4.09	12.803	8	2	13	2	1	264	28.7	9.45
XP_006075671	malate dehydrogenase, cytoplasmic	MDH1	2.93	4.287	4	1	2	1	1	334	36.4	6.58
NP_001277813	malate dehydrogenase, mitochondrial	MDH2	2.09	3.532	3	1	5	1	1	338	35.7	8.56
XP_006053007	malectin isoform X1	MLEC	4.84	4.537	5	1	3	1	1	282	31.4	5.54
XP_025123282	malectin isoform X2	MLEC	4.84	4.537	6	1	3	1	1	209	23.9	5.14
XP_006043252	mammaglobin-A	LOC102396096	5.52	75.275	34	8	425	8	1	94	10.8	4.67
XP_006054278	melanotransferrin isoform X1	MELTF	4.2	166.365	29	18	163	18	1	746	81.4	6.13
XP_006054279	melanotransferrin isoform X2	MELTF.1	4.2	166.365	30	18	163	18	1	745	81.3	6.13
XP_006080250	membrane-associated progesterone receptor component 1	PGRMC1	2.18	2.023	4	1	6	1	1	194	21.6	4.65
XP_025121775	membrane-spanning 4-domains subfamily A member 14	MS4A14	4.96	2.48	1	1	3	1	1	860	97.2	5.38
XP_025135407	metalloproteinase inhibitor 2	TIMP2	4.44	19.856	18	4	29	4	1	220	24.3	7.47
XP_025131670	MICOS complex subunit MIC26 isoform X1	APOO	1.47	4.317	5	1	1	1	1	220	25	9.1
XP_006072245	MICOS complex subunit MIC26 isoform X2	APOO.1	1.47	4.317	6	1	1	1	1	198	22.5	9.1
XP_006057549	mitochondria-eating protein isoform X1	SPATA18	3.98	42.983	13	7	20	3	1	549	62	8.82
XP_025145834	mitochondria-eating protein isoform X2	SPATA18.1	1.07	31.343	11	5	17	1	1	517	58.4	9
XP_025143006	mucin-6	MUC6	4.82	50.974	4	7	46	7	1	2841	305.6	6.93
XP_025139528	myosin light polypeptide 6 isoform X1	MYL6	1.39	3.559	9	1	1	1	1	151	17	4.55
XP_006075109	myosin light polypeptide 6 isoform X2	MYL6.1	1.39	3.559	9	1	1	1	1	151	16.9	4.65
XP_006080636	N(4)-(beta-N-acetylglucosaminyl)-L-asparaginase	AGA	4.26	12.223	14	3	10	3	1	346	37	6.4
XP_006045267	Na(+)/H(+) exchange regulatory cofactor NHE-RF1	SLC9A3R1	1.86	16.84	14	4	6	4	1	368	39.6	5.39
XP_006073624	N-acetylglucosamine-6-sulfatase	GNS	1.76	16.515	6	4	11	4	1	558	62.5	8.43
XP_006067605	nectin-2 isoform X1	NECTIN2	4.03	18.785	14	3	10	3	1	539	58.1	5.12
XP_006067607	nectin-2 isoform X2	NECTIN2.1	4.03	18.785	15	3	10	3	1	480	51.3	5.68
XP_025145236	neuronal growth regulator 1	NEGR1	2.71	3.415	4	1	2	1	1	354	38.7	6.21
XP_006043264	neutral alpha-glucosidase AB isoform X1	GANAB.1	3.87	7.043	1	1	4	1	1	966	109.4	6.2
XP_006043265	neutral alpha-glucosidase AB isoform X2	GANAB	3.87	7.043	1	1	4	1	1	944	106.8	6.11
XP_006053930	NPC intracellular cholesterol transporter 2	NPC2	3.5	69.693	44	7	91	7	1	149	16.6	7.99
XP_025119523	NSFL1 cofactor p47 isoform X1	NSFL1C	3.62	8.695	4	2	5	2	1	381	41.9	5.26
XP_006049049	NSFL1 cofactor p47 isoform X2	NSFL1C.2	3.62	8.695	5	2	5	2	1	372	40.9	5.25
XP_006049050	NSFL1 cofactor p47 isoform X3	NSFL1C.1	3.62	8.695	5	2	5	2	1	370	40.6	5.19
XP_006050985	nucleobindin-1	NUCB1	2.65	18.064	14	5	26	5	1	457	53.2	5.14
XP_006041251	nucleobindin-2	NUCB2	3.69	47.479	11	5	19	5	1	415	49.2	5.21
XP_006042334	osteopontin	SPP1	5.63	117.303	41	11	131	11	1	280	31.2	4.67
XP_025122548	out at first protein homolog	OAF	0.33	3.183	3	1	1	1	1	282	31.3	7.97
XP_006046499	outer dense fiber protein 1	ODF1	4.43	1.943	4	1	2	1	1	259	29.1	7.99
XP_006065416	outer dense fiber protein 2 isoform X1	ODF2.2	0.84	23.528	6	4	6	4	1	912	105	8.54
XP_025117550	outer dense fiber protein 2 isoform X10	ODF2.13	0.84	23.528	7	4	6	4	1	829	95.8	7.61
XP_025117557	outer dense fiber protein 2 isoform X11	ODF2.7	0.84	23.528	7	4	6	4	1	824	95.3	7.18
XP_025117553	outer dense fiber protein 2 isoform X12	ODF2.3	0.84	23.528	7	4	6	4	1	810	93.3	7.33
XP_025117554	outer dense fiber protein 2 isoform X13	ODF2.11	0.84	23.528	7	4	6	4	1	787	90.6	6.46
XP_025117556	outer dense fiber protein 2 isoform X14	ODF2.1	0.84	23.528	7	4	6	4	1	758	87.1	8.35
XP_006065421	outer dense fiber protein 2 isoform X15	ODF2.9	0.84	23.528	8	4	6	4	1	701	80.7	8.43
XP_006065417	outer dense fiber protein 2 isoform X2	ODF2.12	0.84	23.528	6	4	6	4	1	905	104.3	8.57
XP_006065418	outer dense fiber protein 2 isoform X3	ODF2.6	0.84	23.528	6	4	6	4	1	893	102.9	8.51
XP_025117539	outer dense fiber protein 2 isoform X4	ODF2.4	0.84	23.528	6	4	6	4	1	873	100.6	8.31
XP_025117545	outer dense fiber protein 2 isoform X5	ODF2	0.84	23.528	6	4	6	4	1	868	99.8	7.96
XP_025117546	outer dense fiber protein 2 isoform X6	ODF2.5	0.84	23.528	6	4	6	4	1	868	100	8.05
XP_025117547	outer dense fiber protein 2 isoform X7	ODF2.8	0.84	23.528	6	4	6	4	1	854	98.5	8.27
XP_025117548	outer dense fiber protein 2 isoform X8	ODF2.10	0.84	23.528	7	4	6	4	1	831	95.9	7.46
XP_025117549	outer dense fiber protein 2 isoform X9	ODF2.14	0.84	23.528	7	4	6	4	1	829	95.4	7.47
XP_025142930	outer dense fiber protein 3 isoform X1	ODF3	3.32	22.089	21	4	21	4	1	254	27.6	9.88
XP_025142931	outer dense fiber protein 3 isoform X2	ODF3.1	3.32	22.089	26	4	21	4	1	204	22.4	10.42
XP_025142932	outer dense fiber protein 3 isoform X3	ODF3	3.21	6.094	7	1	7	1	1	187	20.4	9.61
XP_025138367	outer dense fiber protein 3B isoform X1	ODF3B.2	2.93	4.097	3	1	4	1	1	342	36.9	10.61
XP_025138369	outer dense fiber protein 3B isoform X2	ODF3B	2.93	4.097	3	1	4	1	1	330	35.4	10.33
XP_025138371	outer dense fiber protein 3B isoform X4	ODF3B.1	2.93	4.097	4	1	4	1	1	277	30	10.32
XP_025138372	outer dense fiber protein 3B isoform X5	ODF3B.3	2.93	4.097	4	1	4	1	1	274	29.7	10.4
XP_006059363	pantetheinase isoform X1	LOC102411389	-1.42	1.629	2	1	3	1	1	514	57.4	5.34
XP_006059364	pantetheinase isoform X2	LOC102411389.6	-1.42	1.629	2	1	3	1	1	510	56.8	5.58
XP_025150305	pantetheinase isoform X3	LOC102411389.1	-1.42	1.629	2	1	3	1	1	501	55.9	5.4
XP_025150307	pantetheinase isoform X4	LOC102411389.2	-1.42	1.629	2	1	3	1	1	499	55.6	5.4
XP_025150308	pantetheinase isoform X5	LOC102411389.3	-1.42	1.629	2	1	3	1	1	457	51.1	5.78
XP_025150309	pantetheinase isoform X6	LOC102411389.4	-1.42	1.629	2	1	3	1	1	402	44.7	5.41
XP_025150310	pantetheinase isoform X7	LOC102411389.5	-1.42	1.629	3	1	3	1	1	271	30.1	6.05
XP_025135821	peptide YY isoform X4	LOC102414386	0.96	2.886	8	1	6	1	1	97	11.1	7.34
XP_006056471	peptidyl-glycine alpha-amidating monooxygenase isoform X1	PAM.6	3.55	2.392	1	1	2	1	1	973	108.1	6.68
XP_025147958	peptidyl-glycine alpha-amidating monooxygenase isoform X2	PAM.2	3.55	2.392	1	1	2	1	1	972	108	6.68
XP_025147959	peptidyl-glycine alpha-amidating monooxygenase isoform X3	PAM.5	3.55	2.392	1	1	2	1	1	954	106	6.58
XP_025147960	peptidyl-glycine alpha-amidating monooxygenase isoform X4	PAM.4	3.55	2.392	1	1	2	1	1	905	100.7	6.54
XP_025147961	peptidyl-glycine alpha-amidating monooxygenase isoform X5	PAM.7	3.55	2.392	1	1	2	1	1	904	100.6	6.54
XP_025147962	peptidyl-glycine alpha-amidating monooxygenase isoform X6	PAM.3	3.55	2.392	1	1	2	1	1	886	98.6	6.43
XP_025147963	peptidyl-glycine alpha-amidating monooxygenase isoform X7	PAM	3.55	2.392	1	1	2	1	1	866	96	6.8
XP_025147964	peptidyl-glycine alpha-amidating monooxygenase isoform X8	PAM.1	3.55	2.392	1	1	2	1	1	865	96	6.8
XP_006051354	peptidyl-prolyl cis-trans isomerase A isoform X1	PPIA	4.06	1.854	6	1	5	1	1	164	17.9	8.16
XP_025147127	peptidyl-prolyl cis-trans isomerase A isoform X2	PPIA.1	4.06	1.854	10	1	5	1	1	104	11.3	8.31
XP_006050953	peroxiredoxin-5, mitochondrial isoform X1	PRDX5.1	3.47	27.024	35	5	32	5	1	219	23.3	8.07
XP_025142397	peroxiredoxin-5, mitochondrial isoform X2	PRDX5	3.63	21.471	35	4	27	4	1	174	18.6	7.83
XP_006074296	phosphatidylethanolamine-binding protein 1	PEBP1	3.92	9.68	14	2	9	2	1	187	21	7.49
XP_025134979	phosphatidylethanolamine-binding protein 4 isoform X1	PEBP4.1	-2.86	13.574	13	2	8	2	1	222	25	7.01
XP_025134980	phosphatidylethanolamine-binding protein 4 isoform X2	PEBP4	-3.13	10.715	11	1	3	1	1	189	21.2	6.54
XP_025134981	phosphatidylethanolamine-binding protein 4 isoform X3	PEBP4.2	-2.86	13.574	16	2	8	2	1	184	20.7	5.94
XP_006051590	phosphoglycerate kinase 1	PGK1	0.45	9.433	7	3	12	3	1	417	44.5	8.27
XP_006050775	phosphoglycerate kinase 2	PGK2	3.21	70.354	32	18	88	18	1	417	44.8	8.09
XP_006061228	phosphoglycerate mutase 1	PGAM1	4.08	25.627	5	4	26	4	1	254	28.8	7.18
XP_006074829	phosphoglycerate mutase 2	PGAM2	4.17	94.672	35	12	135	12	1	253	28.7	8.72
XP_025130327	platelet-derived growth factor subunit A isoform X1	PDGFA	2.04	6.213	12	2	3	2	1	214	24.3	9.79
XP_025130328	platelet-derived growth factor subunit A isoform X2	PDGFA.1	2.04	6.213	12	2	3	2	1	211	24	9.41
XP_006049891	pleiotrophin isoform X1	PTN.1	6.39	8.915	8	2	11	2	1	168	18.9	9.6
XP_006049892	pleiotrophin isoform X2	PTN	6.39	8.915	8	2	11	2	1	167	18.8	9.6
XP_006043871	polymeric immunoglobulin receptor	PIGR	4.88	73.606	23	14	58	14	1	757	82.4	6.15
XP_025128789	polyubiquitin-B	LOC112581264	3.24	14.401	41	2	14	2	1	305	34.3	7.47
XP_025134772	polyubiquitin-B isoform X1	UBB	3.24	14.401	32	2	14	2	1	393	43.8	9.33
XP_006050061	polyubiquitin-C	UBC	3.24	14.401	37	2	14	2	1	918	103.1	7.69
XP_025148379	prefoldin subunit 1 isoform X2	PFDN1.1	3.41	1.477	7	1	1	1	1	122	14.2	6.81
XP_025148380	prefoldin subunit 1 isoform X3	PFDN1	3.41	1.477	8	1	1	1	1	103	12	5.86
XP_006048448	probable inactive ribonuclease-like protein 12 isoform X1	RNASE12.1	6.64	4.184	5	1	3	1	1	203	23.8	7.46
XP_006048449	probable inactive ribonuclease-like protein 12 isoform X2	RNASE12	6.64	4.184	6	1	3	1	1	169	19.7	8.31
XP_025151782	probable inactive ribonuclease-like protein 12 isoform X3	RNASE12.2	6.64	4.184	7	1	3	1	1	145	16.9	6.65
XP_006056444	programmed cell death protein 5	PDCD5	1.76	9.028	19	2	6	2	1	125	14.2	6.58
XP_025116388	prominin-2 isoform X1	PROM2.1	1.04	1.915	1	1	2	1	1	833	91.5	6.49
XP_006063055	prosaposin isoform X1	PSAP	3.74	9.549	6	2	6	2	1	528	58.5	5.11
XP_006063056	prosaposin isoform X2	PSAP.1	3.74	9.549	6	2	6	2	1	527	58.3	5.11
XP_006063057	prosaposin isoform X3	PSAP.2	3.74	9.549	6	2	6	2	1	525	58.1	5.15
XP_006062595	prostaglandin-H2 D-isomerase	PTGDS	4.85	1.623	4	1	1	1	1	191	21.2	7.3
XP_006072359	proteasomal ubiquitin receptor ADRM1 isoform X1	ADRM1	3.82	3.474	4	1	2	1	1	410	42.4	5.02
XP_025119593	proteasomal ubiquitin receptor ADRM1 isoform X2	ADRM1.2	3.82	3.474	4	1	2	1	1	407	41.9	4.91
XP_025119594	proteasomal ubiquitin receptor ADRM1 isoform X3	ADRM1.1	3.82	3.474	4	1	2	1	1	372	38.8	9.06
XP_025119595	proteasomal ubiquitin receptor ADRM1 isoform X4	ADRM1.3	3.82	3.474	4	1	2	1	1	371	37.7	4.79
XP_025122477	proteasome subunit alpha type-1 isoform X1	PSMA1.1	4.59	23.584	8	2	10	2	1	271	30.3	6.62
XP_006054502	proteasome subunit alpha type-1 isoform X2	PSMA1	4.59	23.584	8	2	10	2	1	263	29.6	6.61
XP_006044451	proteasome subunit alpha type-4	PSMA4	3.14	3.301	3	1	3	1	1	261	29.5	7.72
XP_006052236	proteasome subunit alpha type-5	PSMA5	4.29	6.191	8	1	2	1	1	241	26.4	4.79
XP_006043909	proteasome subunit alpha type-6 isoform X1	PSMA6	2.12	5.053	5	1	3	1	1	246	27.4	6.76
XP_025127318	proteasome subunit alpha type-6 isoform X2	PSMA6.1	2.12	5.053	6	1	3	1	1	227	25.2	6.55
XP_006060155	proteasome subunit beta type-6	PSMB6	2.97	6.85	9	2	9	2	1	239	25.4	4.92
XP_006050392	protein CutA isoform X1	CUTA.1	3.61	7.036	9	1	12	1	1	154	16.4	5.48
XP_006050391	protein CutA isoform X2	CUTA	3.61	7.036	8	1	12	1	1	177	18.9	7.97
XP_006064284	protein disulfide-isomerase	P4HB	4.42	2.939	2	1	2	1	1	510	57.1	4.91
XP_006042699	protein disulfide-isomerase A3	PDIA3	3.73	24.232	9	5	20	5	1	505	56.9	6.81
XP_006049304	protein FAM136A	FAM136A	3.04	3.504	7	1	1	1	1	151	17	7.85
XP_006049448	protein FAM161A isoform X1	FAM161A.1	2.96	9.154	6	3	8	3	1	721	83.9	8.82
XP_006049450	protein FAM161A isoform X2	FAM161A	2.96	9.154	6	3	8	3	1	665	77.2	8.19
XP_006049452	protein FAM161A isoform X3	FAM161A	2.54	4.01	4	2	3	2	1	608	71.4	9.25
XP_006044299	protein FAM205C isoform X1	FAM205C	3.7	8.7	9	2	4	2	1	408	45.2	9.57
XP_025137439	protein FAM205C isoform X2	FAM205C.1	3.7	8.7	9	2	4	2	1	407	45	9.61
XP_025137440	protein FAM205C isoform X3	FAM205C.2	3.7	8.7	9	2	4	2	1	405	44.7	9.51
XP_025137441	protein FAM205C isoform X4	FAM205C.3	3.7	8.7	10	2	4	2	1	396	42.9	9.6
XP_006077003	protein FAM3B isoform X1	FAM3B	3.32	14.051	20	4	19	4	1	235	25.9	8.82
XP_006077004	protein FAM3B isoform X2	FAM3B.1	3.32	14.051	21	4	19	4	1	234	25.9	8.82
XP_006049700	protein FAM3C	FAM3C	2.1	9.73	10	2	6	2	1	227	24.8	8.5
XP_006075936	protein FAM71B	FAM71B	2.22	7.348	3	1	4	1	1	587	62.4	9.69
XP_025143669	protein MENT isoform X1	C6H1orf56	2.59	100.921	49	13	129	13	1	349	38	8.13
XP_006058204	protein MENT isoform X2	C6H1orf56.1	2.75	99.16	52	12	127	12	1	308	33.2	7.08
XP_006077971	protein OS-9 isoform X1	OS9.3	6.29	9.235	4	2	10	2	1	679	77	4.89
XP_006077972	protein OS-9 isoform X2	OS9.2	6.29	9.235	4	2	10	2	1	667	75.8	4.91
XP_006077974	protein OS-9 isoform X3	OS9	6.29	9.235	4	2	10	2	1	624	70.6	4.84
XP_006077975	protein OS-9 isoform X4	OS9.1	6.29	9.235	4	2	10	2	1	612	69.4	4.86
XP_006073367	protein phosphatase methylesterase 1 isoform X1	PPME1	1.5	3.119	3	1	1	1	1	386	42.3	5.97
XP_006073368	protein phosphatase methylesterase 1 isoform X2	PPME1.3	1.5	3.119	3	1	1	1	1	380	41.7	5.97
XP_025122221	protein phosphatase methylesterase 1 isoform X3	PPME1.2	1.5	3.119	3	1	1	1	1	378	41.6	5.97
XP_006073366	protein phosphatase methylesterase 1 isoform X4	PPME1.1	1.5	3.119	3	1	1	1	1	408	44.8	5.85
XP_006042242	protein PROCA1 isoform X1	PROCA1.2	2.2	4.867	5	1	3	1	1	375	42.2	6.67
XP_006042243	protein PROCA1 isoform X2	PROCA1	2.2	4.867	5	1	3	1	1	350	39.1	7.08
XP_006042244	protein PROCA1 isoform X3	PROCA1.1	2.2	4.867	5	1	3	1	1	346	39.1	6.89
XP_006076733	protein/nucleic acid deglycase DJ-1	PARK7	2.66	22.848	28	5	21	5	1	189	20	7.33
XP_025135467	putative sodium-coupled neutral amino acid transporter 10 isoform X1	SLC38A10.1	2.26	4.72	1	1	3	1	1	1094	116.8	5.85
XP_025135468	putative sodium-coupled neutral amino acid transporter 10 isoform X2	SLC38A10.5	2.26	4.72	1	1	3	1	1	1091	116.5	5.95
XP_025135469	putative sodium-coupled neutral amino acid transporter 10 isoform X3	SLC38A10.6	2.26	4.72	1	1	3	1	1	1089	116.2	5.85
XP_025135470	putative sodium-coupled neutral amino acid transporter 10 isoform X4	SLC38A10	2.26	4.72	1	1	3	1	1	1086	115.9	5.8
XP_025135471	putative sodium-coupled neutral amino acid transporter 10 isoform X5	SLC38A10.4	2.26	4.72	1	1	3	1	1	1085	115.8	5.85
XP_025135472	putative sodium-coupled neutral amino acid transporter 10 isoform X6	SLC38A10.3	2.26	4.72	1	1	3	1	1	1081	115.3	5.8
XP_025135473	putative sodium-coupled neutral amino acid transporter 10 isoform X7	SLC38A10.2	2.26	4.72	2	1	3	1	1	834	89.3	6.71
XP_025148552	PWWP domain-containing protein MUM1 isoform X1	LOC102409912	-4.81	1.409	1	1	14	1	1	657	72.8	8.63
XP_006050578	PWWP domain-containing protein MUM1 isoform X2	LOC102409912.1	-4.81	1.409	1	1	14	1	1	641	71.2	8.75
XP_025151996	pyruvate kinase PKM isoform X1	PKM.2	4.22	4.596	2	1	7	1	1	531	58	7.53
XP_025151997	pyruvate kinase PKM isoform X2	PKM.1	4.22	4.596	3	1	7	1	1	436	47.4	6.3
XP_006056975	pyruvate kinase PKM isoform X3	PKM	4.22	4.596	2	1	7	1	1	531	57.9	7.69
XP_006043685	rab GDP dissociation inhibitor alpha	GDI1	4.4	1.611	2	1	1	1	1	447	50.5	5.14
XP_006065585	ran-specific GTPase-activating protein isoform X1	RANBP1	1.69	3.244	5	1	1	1	1	209	24.1	4.84
XP_025122906	ran-specific GTPase-activating protein isoform X2	RANBP1.1	1.69	3.244	5	1	1	1	1	206	23.7	4.92
XP_025148531	receptor expression-enhancing protein 6 isoform X1	REEP6	3.84	7.129	5	1	2	1	1	227	25	9.91
XP_025149456	relaxin-3	RLN3	5.62	20.31	18	3	30	3	1	135	14.8	7.68
XP_006071570	rho-related GTP-binding protein RhoC	RHOC	3.14	2.32	4	1	4	1	1	193	22	6.58
XP_025151786	ribonuclease 4	LOC102414812	4.5	112.256	53	7	209	7	1	147	16.9	8.85
XP_006062164	ribonuclease 4-like	LOC102405757	4.8	46.093	29	3	87	3	1	132	15.2	9.23
XP_025151789	ribonuclease pancreatic-like	LOC102415699	4.4	180.842	78	10	237	9	1	150	16.5	8.29
XP_025141001	ropporin-1A	ROPN1	3.4	7.581	15	3	6	3	1	212	23.9	5.43
XP_006043251	secretoglobin family 1D member isoform X1	LOC102395773.1	4.12	186.986	68	17	736	17	1	102	11.4	8.72
XP_025142305	secretoglobin family 1D member isoform X2	LOC102395773	4.29	147.975	67	13	606	13	1	101	11.3	8.47
XP_006052463	seminal plasma protein A3	SPA3	5.39	55.149	29	4	60	4	1	140	16.2	6.92
XP_006052462	seminal plasma protein BSP-30 kDa	LOC102403094	4.02	10.92	11	3	12	3	1	183	21.3	6.32
XP_025124131	seminal plasma protein PDC-109	LOC102403740	-4.34	4.542	7	1	10	1	1	138	16.1	6.11
XP_025147470	serine protease 58-like	LOC112586553	3.18	3.944	3	1	119	1	1	237	26.7	6.27
XP_025130195	serine protease HTRA1	HTRA1	3.49	3.222	2	1	8	1	1	527	55.9	8.35
XP_025145790	serine protease inhibitor Kazal-type 2 isoform X1	LOC102397733.1	4.75	45.859	45	4	33	4	1	85	9.5	6.98
XP_006058422	serine protease inhibitor Kazal-type 2 isoform X1	LOC102396469	1.56	36.824	43	2	41	2	1	84	9.2	6.48
XP_006058426	serine protease inhibitor Kazal-type 2 isoform X2	LOC102397733	1.56	36.824	47	2	41	2	1	76	8.3	7.71
XP_006069470	serine protease inhibitor Kazal-type 5 isoform X1	SPINK5.3	2.86	39.997	10	8	30	8	1	1155	130.9	8.1
XP_006069471	serine protease inhibitor Kazal-type 5 isoform X2	SPINK5.2	2.86	39.997	10	8	30	8	1	1154	130.7	8.07
XP_006069472	serine protease inhibitor Kazal-type 5 isoform X3	SPINK5.1	2.86	39.997	10	8	30	8	1	1125	127.6	8.1
XP_006069473	serine protease inhibitor Kazal-type 5 isoform X4	SPINK5	2.86	37.089	9	7	29	7	1	1085	122.9	8.1
XP_006069477	serine protease inhibitor Kazal-type 6 isoform X1	LOC102400922	6.64	25.7	28	3	22	3	1	105	11.5	9.45
XP_006069478	serine protease inhibitor Kazal-type 6 isoform X2	LOC102400922.1	6.64	25.7	36	3	22	3	1	80	8.6	8.76
XP_006065240	serine protease inhibitor Kazal-type 8	SPINK8	6.19	8.732	14	1	9	1	1	96	10.8	6.73
XP_025129135	serine/threonine-protein phosphatase 4 regulatory subunit 1 isoform X1	PPP4R1.1	3.5	5.836	2	1	1	1	1	938	104.1	4.75
XP_025129136	serine/threonine-protein phosphatase 4 regulatory subunit 1 isoform X2	PPP4R1.2	3.5	5.836	2	1	1	1	1	937	104	4.75
XP_025129137	serine/threonine-protein phosphatase 4 regulatory subunit 1 isoform X3	PPP4R1.4	3.5	5.836	2	1	1	1	1	937	104	4.75
XP_025129138	serine/threonine-protein phosphatase 4 regulatory subunit 1 isoform X4	PPP4R1	3.5	5.836	2	1	1	1	1	921	102.4	4.79
XP_025129139	serine/threonine-protein phosphatase 4 regulatory subunit 1 isoform X5	PPP4R1.3	3.5	5.836	2	1	1	1	1	895	99.6	4.89
XP_006051476	serotransferrin	LOC102402015	4.64	105.279	23	15	110	14	1	704	77.8	7.21
XP_025127227	serpin A3-1 isoform X1	LOC102414740	-2.38	21.261	11	5	25	3	1	471	53	6.54
XP_025127228	serpin A3-1 isoform X2	LOC102414740.1	-2.38	21.261	13	5	25	3	1	412	46.6	6.27
XP_025127225	serpin A3-3-like	LOC102405963	-1.65	11.831	9	4	20	2	1	411	46.3	8.94
XP_025127210	serpin A3-6-like isoform X2	LOC102411401.3	-1.6	2.414	2	1	5	1	1	480	53.2	5.29
XP_025127221	serpin A3-7	LOC112580892	-2.94	8.789	8	4	15	2	1	417	46.9	6.6
XP_025127222	serpin A3-7-like	LOC102410174	-4.38	6.374	6	3	10	1	1	417	46.8	5.81
XP_025127220	serpin A3-7-like	LOC102409634	-4.38	6.374	6	3	10	1	1	417	47	6.37
XP_025127209	serpin A3-8-like isoform X1	LOC102411401.7	-1.6	2.414	2	1	5	1	1	482	53.4	5.59
XP_025127211	serpin A3-8-like isoform X3	LOC102411401.6	-1.6	2.414	2	1	5	1	1	456	50.9	5.21
XP_025127212	serpin A3-8-like isoform X4	LOC102411401.8	-1.6	2.414	2	1	5	1	1	454	50.4	5.34
XP_025127213	serpin A3-8-like isoform X5	LOC102411401.1	-1.6	2.414	2	1	5	1	1	449	50.1	5.78
XP_025127214	serpin A3-8-like isoform X6	LOC102411401.5	-1.6	2.414	2	1	5	1	1	442	48.9	6.07
XP_025127215	serpin A3-8-like isoform X7	LOC102411401.2	-1.6	2.414	2	1	5	1	1	424	47.2	5.17
XP_025127216	serpin A3-8-like isoform X8	LOC102411401	-1.6	2.414	2	1	5	1	1	418	46.8	5.58
XP_025127218	serpin A3-8-like isoform X9	LOC102411401.4	-1.6	2.414	2	1	5	1	1	417	46.4	5.24
XP_006047011	serum albumin	ALB	-3.48	1323.28	90	104	12791	104	1	607	69.2	6.25
XP_025142102	serum amyloid A protein isoform X1	LOC112577744.1	3.81	17.196	22	3	23	3	1	155	17.3	8.94
XP_025142104	serum amyloid A protein isoform X1	LOC102409057.1	4.73	45.713	55	9	47	9	1	135	14.9	8.97
XP_025142098	serum amyloid A protein isoform X1	LOC102409611	4.75	42.963	22	8	44	8	1	255	28.7	9
XP_025142103	serum amyloid A protein isoform X2	LOC112577744	3.81	17.196	24	3	23	3	1	139	15.6	9.01
XP_025142106	serum amyloid A protein isoform X2	LOC102409057	4.73	45.713	56	9	47	9	1	131	14.5	8.97
XP_025142099	serum amyloid A protein isoform X2	LOC102409611.3	4.75	42.963	27	8	44	8	1	208	23.3	9.47
XP_025142100	serum amyloid A protein isoform X4	LOC102409611.1	4.75	42.963	30	8	44	8	1	187	21.1	9.72
XP_025142101	serum amyloid A protein isoform X5	LOC102409611.2	4.75	42.963	44	8	44	8	1	131	14.5	9.2
XP_025142107	serum amyloid A protein-like	LOC112585166	3.81	29.523	40	6	33	6	1	131	14.5	9.2
XP_006056116	serum amyloid A protein-like	LOC102410151	3.81	17.196	26	3	23	3	1	130	14.5	8.13
XP_025142108	serum amyloid A protein-like	LOC112577794	4.73	45.713	56	9	47	9	1	131	14.6	9.2
XP_006055508	SH3 domain-binding glutamic acid-rich-like protein 3	SH3BGRL3	1.08	3.497	12	1	2	1	1	93	10.4	4.93
XP_025142111	sialate O-acetylesterase isoform X1	SIAE.2	4.48	2.348	2	1	5	1	1	486	54.4	7.11
XP_006057703	sialate O-acetylesterase isoform X2	SIAE.3	4.48	2.348	2	1	5	1	1	522	58.4	6.86
XP_025142112	sialate O-acetylesterase isoform X3	SIAE	4.48	2.348	2	1	5	1	1	487	54.5	7.11
XP_025142113	sialate O-acetylesterase isoform X4	SIAE.1	4.48	2.348	2	1	5	1	1	434	48.7	6.96
XP_006056528	Sjoegren syndrome/scleroderma autoantigen 1	SSSCA1	1.44	1.607	4	1	1	1	1	199	21.5	5.12
XP_006047903	small glutamine-rich tetratricopeptide repeat-containing protein alpha isoform X1	SGTA.1	3.73	29.748	14	4	17	4	1	366	40	6.33
XP_006047901	small glutamine-rich tetratricopeptide repeat-containing protein alpha isoform X2	SGTA	3.73	29.748	14	4	17	4	1	366	39.6	5.19
XP_006047904	small glutamine-rich tetratricopeptide repeat-containing protein alpha isoform X3	SGTA.2	3.73	29.748	16	4	17	4	1	313	34.2	4.84
XP_025148992	small integral membrane protein 20	LOC112577600	1.71	2.49	21	1	1	1	1	67	7.7	9.86
XP_006060548	sodium/potassium-transporting ATPase subunit alpha-4	ATP1A4	2.3	3.485	2	1	1	1	1	1030	113.7	6.57
XP_006076365	sorbitol dehydrogenase isoform X1	SORD.1	3.89	17.366	12	4	16	4	1	356	38.1	7.46
XP_025151301	sorbitol dehydrogenase isoform X2	SORD	4.94	15.608	10	3	15	3	1	315	33.3	7.05
XP_025143934	sortilin isoform X1	SORT1.4	2	6.732	2	1	1	1	1	865	95.3	6.15
XP_025143935	sortilin isoform X2	SORT1.3	2	6.732	2	1	1	1	1	832	91.8	6.06
XP_025150371	sperm acrosome membrane-associated protein 1	SPACA1	1.68	26.003	28	5	32	5	1	299	33.1	4.61
XP_006059495	sperm acrosome membrane-associated protein 3	SPACA3	-2.82	12.518	26	2	4	2	1	163	18.1	5.49
XP_006041029	sperm acrosome membrane-associated protein 4	SPACA4	0.59	5.819	18	1	5	1	1	126	13	6
XP_006062223	sperm acrosome-associated protein 9 isoform X1	SPACA9.1	5.32	8.254	4	1	5	1	1	224	25.1	8.54
XP_025117733	sperm acrosome-associated protein 9 isoform X2	SPACA9	5.32	8.254	6	1	5	1	1	169	19.3	7.52
XP_025152042	sperm equatorial segment protein 1	SPESP1	4.38	81.677	27	10	82	10	1	370	41.9	6.11
XP_006057707	sperm surface protein Sp17	SPA17	1.22	44.868	61	7	24	7	1	147	16.9	4.83
XP_025129710	spermadhesin Z13	LOC112581540	3.3	148.445	46	7	388	4	1	134	15.3	6.06
XP_025129711	spermadhesin Z13-like	LOC112577723	3.58	76.442	28	5	216	2	1	134	15.3	5.94
XP_025148251	sperm-associated acrosin inhibitor-like isoform X1	LOC102397864	5.29	17.032	24	3	18	3	1	87	10.1	8.4
XP_025149973	sperm-associated acrosin inhibitor-like isoform X1	LOC112587117	2.99	2.708	8	1	4	1	1	133	15.4	8.56
XP_025148252	sperm-associated acrosin inhibitor-like isoform X2	LOC102397864.2	2.99	2.708	9	1	4	1	1	113	13.2	8.25
XP_025149975	sperm-associated acrosin inhibitor-like isoform X2	LOC112587117.1	5.29	17.032	24	3	18	3	1	86	10	8.6
XP_025148254	sperm-associated acrosin inhibitor-like isoform X3	LOC102397864.1	2.99	2.708	9	1	4	1	1	110	12.7	8.19
XP_006072599	spermatid-associated protein isoform X1	SPERT	4.4	2.29	2	1	3	1	1	455	52.5	7.25
XP_025118794	spermatid-associated protein isoform X2	SPERT.2	4.4	2.29	2	1	3	1	1	428	49.3	6.93
XP_025118795	spermatid-associated protein isoform X3	SPERT.1	4.4	2.29	2	1	3	1	1	421	48.3	6.86
XP_006050188	spermatogenesis-associated protein 3 isoform X2	SPATA3	3.75	4.96	6	1	2	1	1	230	24.3	11.17
XP_025134228	spermatogenesis-associated protein 3 isoform X3	SPATA3.2	3.75	4.96	6	1	2	1	1	229	24.2	11.17
XP_025134229	spermatogenesis-associated protein 3 isoform X4	SPATA3.1	3.75	4.96	6	1	2	1	1	229	23.6	10.73
XP_025134230	spermatogenesis-associated protein 3 isoform X5	SPATA3.3	3.75	4.96	7	1	2	1	1	199	20.9	10.51
XP_025135723	spermatogenesis-associated protein 32 isoform X1	SPATA32	2.64	13.112	8	3	7	3	1	449	49.1	5.88
XP_025135724	spermatogenesis-associated protein 32 isoform X2	SPATA32.1	2.64	13.112	9	3	7	3	1	365	40.4	5.22
XP_025119160	spleen trypsin inhibitor I	LOC102392354	4.29	4.712	7	1	75	1	1	98	10.6	8.31
XP_025119161	spleen trypsin inhibitor I-like	LOC112577708	4.29	4.712	7	1	75	1	1	98	10.6	8.1
XP_006067446	spondin-2 isoform X1	SPON2.1	2.67	1.994	8	1	1	1	1	332	35.9	6.3
XP_006067447	spondin-2 isoform X2	SPON2	2.67	1.994	9	1	1	1	1	273	29.4	7.71
XP_025134802	stabilizer of axonemal microtubules 1	SAXO1	2.26	14.217	8	2	4	2	1	477	54.6	8.6
XP_006050920	stress-induced-phosphoprotein 1	STIP1	4.63	23.725	8	5	19	5	1	543	62.5	6.43
XP_006055891	succinate--CoA ligase [ADP/GDP-forming] subunit alpha, mitochondrial	SUCLG1	2.86	2.536	3	1	1	1	1	346	36.1	9.32
XP_006048651	sulfhydryl oxidase 1 isoform X1	QSOX1	3.51	21.617	7	6	28	6	1	887	96.3	9.16
XP_006048652	sulfhydryl oxidase 1 isoform X2	QSOX1.1	3.44	18.124	7	5	26	5	1	704	77.3	9.41
XP_025130329	sulfotransferase 1A1	LOC102404894	-5.36	1.386	4	1	3	1	1	295	34.4	6.7
NP_001277902	superoxide dismutase [Cu-Zn]	SOD1	4.62	27.323	25	3	41	3	1	152	15.7	6.52
XP_025125216	synaptogyrin-4	SYNGR4	4.14	2.997	21	1	2	1	1	234	25.4	7.91
XP_006051316	T-complex protein 1 subunit alpha	TCP1	3.37	12.072	6	3	14	3	1	556	60.3	5.99
XP_006058445	T-complex protein 1 subunit beta	CCT2	1.09	19.916	11	3	6	3	1	535	57.4	6.64
XP_006080923	T-complex protein 1 subunit delta	CCT4	5.04	35.167	10	5	43	5	1	545	58.4	7.61
XP_006062005	T-complex protein 1 subunit epsilon	CCT5	3.89	11.572	9	4	5	4	1	541	59.6	5.91
XP_006045987	T-complex protein 1 subunit eta	CCT7	0.87	2.134	2	1	1	1	1	543	59.3	7.42
XP_006052043	T-complex protein 1 subunit gamma	CCT3	3.74	27.435	14	6	26	6	1	545	60.5	6.8
XP_006056409	T-complex protein 1 subunit theta isoform X1	CCT8	4.48	22.409	12	5	22	5	1	553	60.2	5.74
XP_006056410	T-complex protein 1 subunit theta isoform X2	CCT8.1	4.48	22.409	12	5	22	5	1	548	59.6	5.59
XP_006070409	T-complex protein 1 subunit zeta	CCT6A	3.52	8.165	4	2	6	2	1	531	57.9	6.76
XP_025148610	testicular haploid expressed gene protein isoform X1	THEG	3.95	3.987	4	2	5	2	1	381	44	9
XP_025148611	testicular haploid expressed gene protein isoform X2	THEG.1	3.95	3.987	4	2	5	2	1	357	41.1	9.01
XP_025145795	testicular haploid expressed gene protein-like	THEGL	2.68	12.632	7	3	12	3	1	458	52.1	9.33
XP_025124999	testis-expressed protein 101 isoform X1	TEX101.1	3.58	9.849	11	4	9	4	1	325	34.9	6.2
XP_006052461	testis-expressed protein 101 isoform X2	TEX101	3.58	9.849	15	4	9	4	1	253	27.4	6.18
XP_025142334	testis-expressed protein 54-like	LOC112585202	3.65	13.503	18	2	8	2	1	90	10.3	5.6
XP_006065613	testis-specific serine/threonine-protein kinase 1	TSSK1B	4.12	8.472	7	2	5	2	1	367	41.5	7.21
XP_025135924	tetratricopeptide repeat protein 25 isoform X1	TTC25	2.21	8.816	4	2	4	2	1	711	81.5	5.82
XP_006055831	tetratricopeptide repeat protein 25 isoform X2	TTC25.1	2.21	8.816	4	2	4	2	1	683	78.4	5.91
XP_025146903	thioredoxin domain-containing protein 3 isoform X1	NME8.2	4.11	2.362	1	1	9	1	1	588	67.5	4.91
XP_025146904	thioredoxin domain-containing protein 3 isoform X2	NME8	4.11	2.362	1	1	9	1	1	557	63.9	4.89
XP_025146905	thioredoxin domain-containing protein 3 isoform X3	NME8.1	4.11	2.362	2	1	9	1	1	489	56	4.89
XP_025146906	thioredoxin domain-containing protein 3 isoform X4	NME8.3	4.11	2.362	2	1	9	1	1	482	55	4.92
XP_006069866	transcobalamin-2 isoform X1	TCN2	2.69	11.746	9	3	14	3	1	432	47.9	9.03
XP_006069868	transcobalamin-2 isoform X2	TCN2.1	2.69	11.746	10	3	14	3	1	396	44	9.45
XP_006053316	transforming protein RhoA	RHOA	3.14	2.32	4	1	4	1	1	193	21.8	6.1
XP_006064386	transitional endoplasmic reticulum ATPase	VCP	4.15	23.232	7	4	17	4	1	806	89.2	5.26
XP_025135819	transmembrane protein 101 isoform X2	LOC102414386.1	0.96	2.886	3	1	6	1	1	252	28.5	9.66
XP_006054058	transthyretin	TTR	-3.01	58.006	45	7	106	7	1	147	15.8	5.86
XP_006051414	troponin C, skeletal muscle	TNNC2	1.65	1.607	4	1	6	1	1	161	18.2	4.2
XP_025139866	tubulin alpha-1A chain	LOC102414462	0.94	23.713	14	5	12	0	1	451	50.1	5.06
XP_006068865	tubulin alpha-1A chain-like	LOC102415619	-0.18	21.395	12	4	11	0	1	451	50.2	5.11
XP_006054596	tubulin alpha-1B chain	LOC102399969	0.94	19.579	11	4	11	0	2	451	50.1	5.06
XP_006059042	tubulin alpha-1D chain	LOC102397197	0.94	23.713	14	5	12	0	1	452	50.3	5.03
XP_025122971	tubulin alpha-3 chain	LOC102413407	1.08	36.543	18	6	23	1	1	450	49.9	5.1
XP_006059043	tubulin alpha-4A chain	TUBA4A	-0.16	10.46	5	2	4	0	3	448	49.9	5.06
XP_006071457	tubulin alpha-8 chain	TUBA8	3.74	22.063	11	4	7	1	1	449	50	5.2
XP_006052418	tubulin beta chain	TUBB	1.11	32.815	26	7	23	7	1	444	49.6	4.89
XP_025120717	tubulin beta-2A chain	TUBB2A	1.11	21.998	16	5	15	5	1	445	49.9	4.89
XP_025120761	tubulin beta-2B chain isoform X1	LOC102411164.1	1.11	21.998	16	5	15	5	1	445	49.9	4.89
XP_025120766	tubulin beta-2B chain isoform X2	LOC102411164	1.11	21.998	19	5	15	5	1	373	41.9	4.91
XP_006045174	tubulin beta-4A chain	TUBB4A	1.2	36.576	25	6	45	6	1	444	49.6	4.88
XP_006062617	tubulin beta-4B chain	TUBB4B	2.37	70.963	36	11	64	11	1	445	49.8	4.89
XP_006043089	tubulin beta-6 chain isoform X1	TUBB6.1	0.68	15.098	10	3	17	3	1	446	49.9	4.86
XP_025129011	tubulin beta-6 chain isoform X2	TUBB6	0.68	15.098	11	3	17	3	1	374	42	4.87
XP_025151806	tubulin polymerization-promoting protein family member 2 isoform X1	TPPP2.3	4.78	8.423	9	2	9	2	1	314	34.6	9.04
XP_006062131	tubulin polymerization-promoting protein family member 2 isoform X2	TPPP2	4.78	8.423	9	2	9	2	1	286	31.2	9.11
XP_006062132	tubulin polymerization-promoting protein family member 2 isoform X3	TPPP2.1	4.78	8.423	10	2	9	2	1	282	30.9	8.92
XP_025151807	tubulin polymerization-promoting protein family member 2 isoform X4	TPPP2.2	4.78	8.423	12	2	9	2	1	232	25.7	8.6
XP_006076813	type-1 angiotensin II receptor-associated protein isoform X1	AGTRAP.1	1.2	9.052	15	2	2	2	1	155	17.2	6.14
XP_006076814	type-1 angiotensin II receptor-associated protein isoform X2	AGTRAP.2	1.2	9.052	16	2	2	2	1	148	16.4	6.28
XP_025141677	type-1 angiotensin II receptor-associated protein isoform X4	AGTRAP	1.2	9.052	19	2	2	2	1	118	12.9	6.28
XP_025119525	tyrosine-protein phosphatase non-receptor type substrate 1 isoform X1	LOC102394624	0.34	2.542	7	1	1	1	1	337	37.2	9.25
XP_006049053	tyrosine-protein phosphatase non-receptor type substrate 1 isoform X2	LOC102394624.1	0.34	2.542	8	1	1	1	1	286	31.5	9.14
XP_025150005	ubiquitin	LOC112587282	3.24	14.401	24	2	14	2	1	129	14.6	6
XP_006068270	ubiquitin carboxyl-terminal hydrolase isozyme L1	UCHL1	5.48	2.145	4	1	5	1	1	223	24.9	5.16
XP_025116829	ubiquitin-40S ribosomal protein S27a isoform X1	RPS27A.1	3.24	14.401	15	2	14	2	1	205	23	9.77
XP_025116830	ubiquitin-40S ribosomal protein S27a isoform X2	RPS27A	3.24	14.401	20	2	14	2	1	156	18	9.64
XP_006075619	ubiquitin-60S ribosomal protein L40	LOC102399966	3.24	14.401	24	2	14	2	1	128	14.7	9.83
XP_006079904	ubiquitin-like modifier-activating enzyme 6	UBA6	1.72	2.131	1	1	1	1	1	1057	118.7	5.74
XP_006056556	ubiquitin-like protein fubi and ribosomal protein S30	FAU	4.15	3.868	8	1	2	1	1	133	14.4	10.17
XP_006055505	UBX domain-containing protein 11 isoform X1	UBXN11.4	1.92	5.967	3	1	2	1	1	497	55.7	5.67
XP_025134468	UBX domain-containing protein 11 isoform X2	UBXN11.6	1.92	5.967	3	1	2	1	1	491	55.1	8
XP_025134469	UBX domain-containing protein 11 isoform X3	UBXN11	1.92	5.967	3	1	2	1	1	487	54.5	5.57
XP_025134470	UBX domain-containing protein 11 isoform X4	UBXN11.2	1.92	5.967	3	1	2	1	1	486	54.4	5.66
XP_025134471	UBX domain-containing protein 11 isoform X5	UBXN11.7	1.92	5.967	3	1	2	1	1	476	53.3	5.48
XP_006055507	UBX domain-containing protein 11 isoform X6	UBXN11.5	1.92	5.967	3	1	2	1	1	475	53.4	5.48
XP_025134472	UBX domain-containing protein 11 isoform X7	UBXN11.3	1.92	5.967	3	1	2	1	1	466	52.2	5.4
XP_025134473	UBX domain-containing protein 11 isoform X8	UBXN11.1	1.92	5.967	4	1	2	1	1	437	49.2	5.38
XP_025137005	uncharacterized protein C17orf47 homolog	C3H17orf47	3.37	12.688	7	3	12	3	1	570	63.1	9.94
XP_025140197	uncharacterized protein C3orf30 homolog isoform X1	C1H3orf30.1	3.69	14.821	8	4	18	4	1	492	56	4.72
XP_025140201	uncharacterized protein C3orf30 homolog isoform X2	C1H3orf30.2	3.69	14.821	8	4	18	4	1	491	55.9	4.72
XP_025140205	uncharacterized protein C3orf30 homolog isoform X3	C1H3orf30	3.69	14.821	9	4	18	4	1	471	53.5	4.74
XP_006053307	uncharacterized protein C3orf84 homolog isoform X1	C21H3orf84.1	2.83	3.621	5	1	1	1	1	204	23.4	9.25
XP_025127825	uncharacterized protein C3orf84 homolog isoform X2	C21H3orf84	2.83	3.621	5	1	1	1	1	203	23.3	9.25
XP_025127826	uncharacterized protein C3orf84 homolog isoform X3	C21H3orf84.4	2.83	3.621	6	1	1	1	1	197	22.6	9.42
XP_025127827	uncharacterized protein C3orf84 homolog isoform X4	C21H3orf84.3	2.83	3.621	6	1	1	1	1	196	22.5	9.42
XP_025127828	uncharacterized protein C3orf84 homolog isoform X5	C21H3orf84.2	2.83	3.621	7	1	1	1	1	166	19	8.63
XP_006046553	uncharacterized protein C7orf61 homolog isoform X1	C24H7orf61	2.28	14.16	23	4	11	4	1	204	23.5	10.78
XP_006046552	uncharacterized protein C7orf61 homolog isoform X2	C24H7orf61.1	2.28	14.16	24	4	11	4	1	200	22.4	10.43
XP_025152195	uncharacterized protein LOC102395477	LOC102395477	-0.81	19.647	25	6	28	4	1	333	37.1	11.36
XP_025125571	uncharacterized protein LOC102403160	LOC102403160	1.15	20.316	6	4	24	4	1	916	100.5	6.83
XP_006049258	uncharacterized protein LOC102411789	LOC102411789	-2.27	3.756	7	2	17	0	2	397	44.2	11.11
XP_025152187	uncharacterized protein LOC102411988	LOC102411988	-0.81	19.647	25	6	28	4	1	328	36.5	11.3
XP_025136487	uncharacterized protein LOC102412702 isoform X1	LOC102412702.3	2.98	8.175	3	1	6	1	1	520	56.2	6.44
XP_006060226	uncharacterized protein LOC102412702 isoform X2	LOC102412702.2	2.98	8.175	4	1	6	1	1	472	50.4	6.67
XP_025136488	uncharacterized protein LOC102412702 isoform X3	LOC102412702	2.98	8.175	4	1	6	1	1	469	50.5	6.29
XP_025136489	uncharacterized protein LOC102412702 isoform X4	LOC102412702.1	2.98	8.175	4	1	6	1	1	461	49.2	6.7
XP_025136490	uncharacterized protein LOC102412702 isoform X5	LOC102412702.4	2.98	8.175	4	1	6	1	1	436	47.2	6.14
NP_001277817	uncharacterized protein LOC102414936 precursor	LOC102414936	3.46	9.527	14	1	3	1	1	147	16.3	7.2
XP_025134803	uncharacterized protein LOC112583463	LOC112583463	6.64	1.487	3	1	10	1	1	220	23.6	10.11
XP_025151392	unconventional myosin-Va isoform X1	MYO5A.7	4.77	1.469	0	1	13	1	1	1877	217.9	8.38
XP_025151393	unconventional myosin-Va isoform X2	MYO5A.1	4.77	1.469	0	1	13	1	1	1874	217.6	8.34
XP_025151394	unconventional myosin-Va isoform X3	MYO5A	4.77	1.469	0	1	13	1	1	1855	215	8.32
XP_025151395	unconventional myosin-Va isoform X4	MYO5A.3	4.77	1.469	0	1	13	1	1	1853	215.2	8.5
XP_025151396	unconventional myosin-Va isoform X5	MYO5A.2	4.77	1.469	0	1	13	1	1	1852	214.7	8.37
XP_025151397	unconventional myosin-Va isoform X6	MYO5A.5	4.77	1.469	0	1	13	1	1	1850	214.9	8.53
XP_025151398	unconventional myosin-Va isoform X7	MYO5A.6	4.77	1.469	0	1	13	1	1	1828	212	8.47
XP_025151399	unconventional myosin-Va isoform X8	MYO5A.4	4.77	1.469	0	1	13	1	1	1880	218.2	8.35
XP_006046707	UPF0160 protein MYG1, mitochondrial	C4H12orf10	3.96	2.09	5	1	4	1	1	381	42.8	6.64
XP_025138858	vesicle-associated membrane protein 1 isoform X1	VAMP1.1	4.69	7.419	10	2	6	2	1	188	20.7	10.61
XP_006065854	vesicle-associated membrane protein 1 isoform X2	VAMP1	4.69	7.419	16	2	6	2	1	118	12.8	6.65
XP_006062958	vesicle-associated membrane protein 2	VAMP2	4.69	7.419	16	2	6	2	1	116	12.6	8.13
XP_025143019	vesicle-associated membrane protein 3	VAMP3	3.77	33.626	35	4	21	4	1	104	11.6	8.79
XP_006063994	vitamin K-dependent protein S	PROS1	4.42	10.443	6	3	35	3	1	675	75.1	5.36
XP_006061264	V-type proton ATPase subunit G 1	ATP6V1G1	2.43	7.145	19	1	1	1	1	118	13.7	7.97
XP_006051403	WAP four-disulfide core domain protein 10A	LOC102405698	5.44	2.614	7	1	3	1	1	117	13	8.75
XP_006051457	WAP four-disulfide core domain protein 13	WFDC13	5.51	2.897	10	1	17	1	1	93	10.5	8.68
XP_025136892	WAP four-disulfide core domain protein 18-like	LOC112583794	6.64	9.76	16	2	14	2	1	93	9.6	8.84
XP_025136891	WAP four-disulfide core domain protein 18-like	LOC112583793	6.64	9.76	16	2	14	2	1	93	9.5	5.29
XP_006043414	WAP four-disulfide core domain protein 2	WFDC2	5.04	108.84	63	7	785	7	1	123	12.7	4.48
XP_025139695	wnt inhibitory factor 1	WIF1	0.06	6.758	4	1	1	1	1	379	41.5	7.91
XP_025131416	xin actin-binding repeat-containing protein 2 isoform X1	XIRP2	-3.21	4.116	0	1	6	1	1	3306	374.8	6.19
XP_025150226	zinc finger C2HC domain-containing protein 1B	ZC2HC1B	4.48	19.67	14	3	11	3	1	221	24.4	10.04
XP_006053677	zinc-alpha-2-glycoprotein isoform X1	AZGP1.1	4.32	86.758	22	9	101	9	1	299	34	5.53
XP_025130733	zinc-alpha-2-glycoprotein isoform X2	AZGP1	4.59	74.57	15	6	79	6	1	275	30.9	6.7
XP_025146591	zona pellucida-binding protein 1 isoform X1	ZPBP.6	0.06	35.486	18	7	60	7	1	357	40.2	8.32
XP_025146592	zona pellucida-binding protein 1 isoform X2	ZPBP.5	0.06	35.486	19	7	60	7	1	353	40.2	8.78
XP_025146593	zona pellucida-binding protein 1 isoform X3	ZPBP.7	0.06	43.173	24	8	64	8	1	350	39.4	8.72
XP_025146594	zona pellucida-binding protein 1 isoform X4	ZPBP.3	0.06	35.486	20	7	60	7	1	330	37.5	7.78
XP_025146595	zona pellucida-binding protein 1 isoform X5	ZPBP.2	0.06	35.486	20	7	60	7	1	325	36.9	8.95
XP_025146596	zona pellucida-binding protein 1 isoform X6	ZPBP.4	0.06	35.486	20	7	60	7	1	322	36.5	8.97
XP_025146597	zona pellucida-binding protein 1 isoform X7	ZPBP	1.62	7.848	7	2	33	2	1	315	35.3	7.8
XP_025146598	zona pellucida-binding protein 1 isoform X8	ZPBP.1	1.62	7.848	7	2	33	2	1	288	32.7	6.83

## Sheet: All
Accession	Gene Name	Description	Origin/Location/localization	Phobius-Signal Peptide	Function
XP_006062553	ABO	histo-blood group ABO system transferase isoform X5	SPERM SURAFCE	0	MALE FERTILITY
XP_006062549	ABO.2	histo-blood group ABO system transferase isoform X1	SPERM SURAFCE	0	MALE FERTILITY
XP_006062552	ABO.3	histo-blood group ABO system transferase isoform X4	SPERM SURAFCE	0	MALE FERTILITY
XP_025118201	ABO.6	histo-blood group ABO system transferase isoform X8	SPERM SURAFCE	0	MALE FERTILITY
XP_006062550	ABO.7	histo-blood group ABO system transferase isoform X2	SPERM SURAFCE	0	MALE FERTILITY
XP_006051315	ACAT2	acetyl-CoA acetyltransferase, cytosolic		0
XP_006046512	ACHE.1	acetylcholinesterase isoform X1	ACROSOME, NECK, FLAGELLA	0	MOTILITY
XP_006046513	ACHE.2	acetylcholinesterase isoform X2	ACROSOME, NECK, FLAGELLA	0	MOTILITY
XP_006046514	ACHE.3	acetylcholinesterase isoform X3	ACROSOME, NECK, FLAGELLA	0	MOTILITY
XP_025138571	ACO2	aconitate hydratase, mitochondrial isoform X1		0
XP_006068964	ACO2.1	aconitate hydratase, mitochondrial isoform X2		0
XP_025138353	ACR	acrosin isoform X2	ACROSOME	0	ZP PENETRATION
XP_006063116	ACTA1	actin, alpha skeletal muscle		0
XP_006058509	ACTA2	LOW QUALITY PROTEIN: actin, aortic smooth muscle		0
NP_001277861	ACTB	actin, cytoplasmic 1		0
XP_025130274	ACTB.1	actin, cytoplasmic 1 isoform X1		0
XP_006044050	ACTC1	actin, alpha cardiac muscle 1		0
XP_025135478	ACTG1	actin, cytoplasmic 2		0
XP_006046012	ACTG2	actin, gamma-enteric smooth muscle		0
XP_025137973	ACTL7A	actin-like protein 7A	SPERM HEAD, TAIL	0	CAPACITATION
XP_006064972	ACTR1A	alpha-centractin	TAIL	0	SPERM SURVIVAL
XP_006059944	ACTR1B	beta-centractin isoform X1		0
XP_025116446	ACTR1B.1	beta-centractin isoform X2		0
XP_006042743	ACTRT2	actin-related protein T2		0
XP_025150257	ADGRG6.2	adhesion G-protein coupled receptor G6 isoform X6	SPERM PM	0	SPERMATOGENESIS
XP_025119593	ADRM1.2	proteasomal ubiquitin receptor ADRM1 isoform X2	SPERM SURFACE	0	CAPACITATION, ZP PENETRATION
XP_006071338	ADSL	adenylosuccinate lyase		0
XP_025141677	AGTRAP	type-1 angiotensin II receptor-associated protein isoform X4		0
XP_006076813	AGTRAP.1	type-1 angiotensin II receptor-associated protein isoform X1		0
XP_006076814	AGTRAP.2	type-1 angiotensin II receptor-associated protein isoform X2		0
XP_006071961	AGXT2	alanine--glyoxylate aminotransferase 2, mitochondrial		0
XP_006048131	AHCY	adenosylhomocysteinase		0
XP_025132374	AIFM1	apoptosis-inducing factor 1, mitochondrial isoform X2		0
XP_025132373	AIFM1.1	apoptosis-inducing factor 1, mitochondrial isoform X1		0
XP_006077255	AIMP1	aminoacyl tRNA synthase complex-interacting multifunctional protein 1 isoform X2	GERM CELLS	0	SPERMATOGENESIS
XP_006077256	AIMP1.1	aminoacyl tRNA synthase complex-interacting multifunctional protein 1 isoform X3	GERM CELLS	0	SPERMATOGENESIS
XP_006077254	AIMP1.2	aminoacyl tRNA synthase complex-interacting multifunctional protein 1 isoform X1	GERM CELLS	0	SPERMATOGENESIS
XP_006074537	AK1	adenylate kinase isoenzyme 1 isoform X2	EPIDIDYMOSOMES	0	MOTILITY, GAMETE INTERACTION
XP_006074532	AK1.1	adenylate kinase isoenzyme 1 isoform X1	EPIDIDYMOSOMES	0	MOTILITY, GAMETE INTERACTION
XP_006054730	AK2	adenylate kinase 2, mitochondrial isoform X1		0
XP_006054731	AK2.1	adenylate kinase 2, mitochondrial isoform X2		0
XP_025144323	AK4	adenylate kinase 4, mitochondrial isoform X3		0
XP_025138840	AKAP3	LOW QUALITY PROTEIN: A-kinase anchor protein 3	CYTOPLASM	0	CAPACITATION, MOTILITY
XP_006059541	AKAP4	A-kinase anchor protein 4 isoform X1	CYTOPLASM	0	CAPACITATION, MOTILITY, FERTILITY
XP_006059540	AKAP4.1	A-kinase anchor protein 4 isoform X2		0
XP_006052615	AKR1A1	alcohol dehydrogenase [NADP(+)] isoform X3		0
XP_006052617	AKR1A1.1	alcohol dehydrogenase [NADP(+)] isoform X2		0
XP_006042389	AKR1B1	aldose reductase		0
XP_006079932	AKR1B10	LOW QUALITY PROTEIN: aldo-keto reductase family 1 member B10	EPIDIDYMOSOMES	0	MOTILITY, GAMETE INTERACTION
XP_025151461	ALDH1A2	retinal dehydrogenase 2		0
XP_006070551	ALDOA	fructose-bisphosphate aldolase A isoform X1	CYTOPLASM	0	SPERMATOGENESIS, MOTILITY
XP_006070553	ALDOA.1	fructose-bisphosphate aldolase A isoform X2	CYTOPLASM	0	SPERMATOGENESIS, MOTILITY
XP_025116602	ALMS1	Alstrom syndrome protein 1 isoform X4	GERM CELLS	0	SPERMATOGENESIS
XP_025116599	ALMS1.1	Alstrom syndrome protein 1 isoform X2	GERM CELLS	0	SPERMATOGENESIS
XP_025116598	ALMS1.2	Alstrom syndrome protein 1 isoform X1	GERM CELLS	0	SPERMATOGENESIS
XP_006045993	ALMS1.3	Alstrom syndrome protein 1 isoform X8	GERM CELLS	0	SPERMATOGENESIS
XP_025116604	ALMS1.4	Alstrom syndrome protein 1 isoform X7	GERM CELLS	0	SPERMATOGENESIS
XP_006045992	ALMS1.5	Alstrom syndrome protein 1 isoform X6	GERM CELLS	0	SPERMATOGENESIS
XP_025116603	ALMS1.6	Alstrom syndrome protein 1 isoform X5	GERM CELLS	0	SPERMATOGENESIS
XP_025116600	ALMS1.7	Alstrom syndrome protein 1 isoform X3	GERM CELLS	0	SPERMATOGENESIS
XP_025134560	ALPL.1	alkaline phosphatase, tissue-nonspecific isozyme isoform X2		0
XP_025135503	ALYREF	THO complex subunit 4		0
XP_025124332	ANKRD11	ankyrin repeat domain-containing protein 11 isoform X5	TESTIS	0	SPERMATOGENESIS
XP_025124323	ANKRD11.1	ankyrin repeat domain-containing protein 11 isoform X1	TESTIS	0	SPERMATOGENESIS
XP_025124327	ANKRD11.2	ankyrin repeat domain-containing protein 11 isoform X2	TESTIS	0	SPERMATOGENESIS
XP_025124331	ANKRD11.3	ankyrin repeat domain-containing protein 11 isoform X4	TESTIS	0	SPERMATOGENESIS
XP_025124330	ANKRD11.4	ankyrin repeat domain-containing protein 11 isoform X3	TESTIS	0	SPERMATOGENESIS
XP_006067744	ANXA1	annexin A1		0
XP_006043337	ANXA2	annexin A2		0
XP_006053336	APEH	acylamino-acid-releasing enzyme isoform X1		0
XP_025128673	APEH.1	acylamino-acid-releasing enzyme isoform X2		0
XP_006066761	AQP7	aquaporin-7 isoform X1	SPERM SURFACE	0	MOTILITY, MALE FERTILITY
XP_025137687	AQP7.1	aquaporin-7 isoform X3	SPERM SURFACE	0	MOTILITY, MALE FERTILITY
XP_006066762	AQP7.2	aquaporin-7 isoform X2	SPERM SURFACE	0	MOTILITY, MALE FERTILITY
XP_025145660	ART3	ecto-ADP-ribosyltransferase 3 isoform X2	TESTIS	0	SPERMATOGENESIS, MALE FERTILITY
XP_025145659	ART3.1	ecto-ADP-ribosyltransferase 3 isoform X1	TESTIS	0	SPERMATOGENESIS, MALE FERTILITY
XP_025145667	ART3.2	ecto-ADP-ribosyltransferase 3 isoform X6	TESTIS	0	SPERMATOGENESIS, MALE FERTILITY
XP_025145668	ART3.3	ecto-ADP-ribosyltransferase 3 isoform X7	TESTIS	0	SPERMATOGENESIS, MALE FERTILITY
XP_025145661	ART3.5	ecto-ADP-ribosyltransferase 3 isoform X3	TESTIS	0	SPERMATOGENESIS, MALE FERTILITY
XP_025145666	ART3.6	ecto-ADP-ribosyltransferase 3 isoform X5	TESTIS	0	SPERMATOGENESIS, MALE FERTILITY
XP_006064946	ASPM	LOW QUALITY PROTEIN: abnormal spindle-like microcephaly-associated protein		0
XP_006043253	ASRGL1	isoaspartyl peptidase/L-asparaginase		0
XP_006041818	ATG16L1	autophagy-related protein 16-1 isoform X3	SPERM PM	0	MOTILITY, APOPTOSIS
XP_006041819	ATG16L1.1	autophagy-related protein 16-1 isoform X4	SPERM PM	0	MOTILITY, APOPTOSIS
XP_025144944	ATG16L1.2	autophagy-related protein 16-1 isoform X1	SPERM PM	0	MOTILITY, APOPTOSIS
XP_025144945	ATG16L1.3	autophagy-related protein 16-1 isoform X2	SPERM PM	0	MOTILITY, APOPTOSIS
XP_006060548	ATP1A4	sodium/potassium-transporting ATPase subunit alpha-4		0
XP_006048358	ATP2A2	sarcoplasmic/endoplasmic reticulum calcium ATPase 2 isoform X1		0
XP_006048359	ATP2A2.1	sarcoplasmic/endoplasmic reticulum calcium ATPase 2 isoform X2		0
XP_006075344	ATP5F1A	ATP synthase subunit alpha, mitochondrial	MITOCHONDRIA	0	MALE FERTILITY
XP_006049715	ATP5IF1	ATPase inhibitor, mitochondrial		0
XP_025140038	ATP6V1A	V-type proton ATPase catalytic subunit A	ACROSOME	0	MOTILITY, CAPACITATION, ZP PENETRATION
XP_006066713	ATP6V1B1	V-type proton ATPase subunit B, kidney isoform	ACROSOME	0	MOTILITY, CAPACITATION, ZP PENETRATION
XP_006054070	ATP6V1B2	V-type proton ATPase subunit B, brain isoform	ACROSOME	0	MOTILITY, CAPACITATION, ZP PENETRATION
XP_025116748	ATP6V1E2	V-type proton ATPase subunit E 2 isoform X2	ACROSOME	0	MOTILITY, CAPACITATION, ZP PENETRATION
XP_025116743	ATP6V1E2.1	V-type proton ATPase subunit E 2 isoform X1	ACROSOME	0	MOTILITY, CAPACITATION, ZP PENETRATION
XP_006074439	ATP6V1F	V-type proton ATPase subunit F	ACROSOME	0	MOTILITY, CAPACITATION, ZP PENETRATION
XP_006061264	ATP6V1G1	V-type proton ATPase subunit G 1	ACROSOME	0	MOTILITY, CAPACITATION, ZP PENETRATION
XP_006077052	ATP6V1H	V-type proton ATPase subunit H isoform X4	ACROSOME	0	MOTILITY, CAPACITATION, ZP PENETRATION
XP_006077050	ATP6V1H.1	V-type proton ATPase subunit H isoform X3	ACROSOME	0	MOTILITY, CAPACITATION, ZP PENETRATION
XP_025121199	ATP6V1H.2	V-type proton ATPase subunit H isoform X2	ACROSOME	0	MOTILITY, CAPACITATION, ZP PENETRATION
XP_025121198	ATP6V1H.3	V-type proton ATPase subunit H isoform X1	ACROSOME	0	MOTILITY, CAPACITATION, ZP PENETRATION
XP_006066766	B4GALT1	beta-1,4-galactosyltransferase 1		0
XP_025123007	BAG6	large proline-rich protein BAG6 isoform X6		0
XP_025123000	BAG6.1	large proline-rich protein BAG6 isoform X5	GERM CELLS	0	ZP PENETRATION, MALE FERTILITY
XP_025122988	BAG6.2	large proline-rich protein BAG6 isoform X3	GERM CELLS	0	ZP PENETRATION, MALE FERTILITY
XP_025122973	BAG6.3	large proline-rich protein BAG6 isoform X1	GERM CELLS	0	ZP PENETRATION, MALE FERTILITY
XP_025123011	BAG6.4	large proline-rich protein BAG6 isoform X7	GERM CELLS	0	ZP PENETRATION, MALE FERTILITY
XP_025123021	BAG6.5	large proline-rich protein BAG6 isoform X9	GERM CELLS	0	ZP PENETRATION, MALE FERTILITY
XP_025123025	BAG6.6	large proline-rich protein BAG6 isoform X10	GERM CELLS	0	ZP PENETRATION, MALE FERTILITY
XP_025122980	BAG6.7	large proline-rich protein BAG6 isoform X2	GERM CELLS	0	ZP PENETRATION, MALE FERTILITY
XP_025122994	BAG6.8	large proline-rich protein BAG6 isoform X4	GERM CELLS	0	ZP PENETRATION, MALE FERTILITY
XP_025123017	BAG6.9	large proline-rich protein BAG6 isoform X8	GERM CELLS	0	ZP PENETRATION, MALE FERTILITY
XP_025126466	BASP1	brain acid soluble protein 1 isoform X1		0
XP_025126467	BASP1.1	brain acid soluble protein 1 isoform X2		0
XP_006071481	BID	BH3-interacting domain death agonist isoform X2		0
XP_006071479	BID.1	BH3-interacting domain death agonist isoform X1		0
XP_006062177	BTF3	transcription factor BTF3 isoform X1		0
XP_006062178	BTF3.1	transcription factor BTF3 isoform X2		0
XP_025140205	C1H3orf30	uncharacterized protein C3orf30 homolog isoform X3		0
XP_025140197	C1H3orf30.1	uncharacterized protein C3orf30 homolog isoform X1		0
XP_025140201	C1H3orf30.2	uncharacterized protein C3orf30 homolog isoform X2		0
XP_025135902	C1H4orf47	LOW QUALITY PROTEIN: UPF0602 protein C4orf47 homolog		0
XP_025127825	C21H3orf84	uncharacterized protein C3orf84 homolog isoform X2		0
XP_006053307	C21H3orf84.1	uncharacterized protein C3orf84 homolog isoform X1		0
XP_025127828	C21H3orf84.2	uncharacterized protein C3orf84 homolog isoform X5		0
XP_025127827	C21H3orf84.3	uncharacterized protein C3orf84 homolog isoform X4		0
XP_025127826	C21H3orf84.4	uncharacterized protein C3orf84 homolog isoform X3		0
XP_006046553	C24H7orf61	uncharacterized protein C7orf61 homolog isoform X1		0
XP_006046552	C24H7orf61.1	uncharacterized protein C7orf61 homolog isoform X2		0
XP_025137005	C3H17orf47	uncharacterized protein C17orf47 homolog		0
XP_006046707	C4H12orf10	UPF0160 protein MYG1, mitochondrial		0
XP_025120772	CA2	carbonic anhydrase 2	SPERM PM	0	CAPACITATION, MOTILITY, FERTILITY
XP_006075221	CABYR	calcium-binding tyrosine phosphorylation-regulated protein isoform X2	FLAGELLUM	0	CAPACITATION
XP_025129120	CABYR.1	calcium-binding tyrosine phosphorylation-regulated protein isoform X1	FLAGELLUM	0	CAPACITATION
XP_025150878	CALM1	calmodulin-1 isoform X1	CYTOPLASM	0	SPERMATOGENESIS, FERTILIZATION
XP_006054867	CALM2	calmodulin-2	CYTOPLASM	0	SPERMATOGENESIS, FERTILIZATION
XP_006053538	CAND1	cullin-associated NEDD8-dissociated protein 1	CYTOPLASM	0	MOTILITY
XP_025128642	CAND2	cullin-associated NEDD8-dissociated protein 2	CYTOPLASM	0	MOTILITY
XP_006067250	CAPS	LOW QUALITY PROTEIN: calcyphosin		0
XP_006071556	CAPZA1	F-actin-capping protein subunit alpha-1	TESTIS	0	MALE FERTILITY
XP_025134622	CAPZB	F-actin-capping protein subunit beta isoform X3	TESTIS	0	MALE FERTILITY
XP_006068164	CAPZB.1	F-actin-capping protein subunit beta isoform X2	TESTIS	0	MALE FERTILITY
XP_025134621	CAPZB.2	F-actin-capping protein subunit beta isoform X1	TESTIS	0	MALE FERTILITY
XP_025130476	CARHSP1	calcium-regulated heat-stable protein 1		0
XP_006074367	CBX1	chromobox protein homolog 1		0
XP_006066119	CBX3	chromobox protein homolog 3 isoform X2		0
XP_006066118	CBX3.1	chromobox protein homolog 3 isoform X1		0
XP_006063778	CBX5	chromobox protein homolog 5	EPIDIDYMIS	0	EMBRYONIC DEVELOPMENT
XP_006073580	CCDC105	coiled-coil domain-containing protein 105		0
XP_025124549	CCDC113	coiled-coil domain-containing protein 113 isoform X1	CENTRIOLE	0	MOTILITY
XP_006072665	CCDC113.1	coiled-coil domain-containing protein 113 isoform X2	CENTRIOLE	0	MOTILITY
XP_025124550	CCDC113.2	coiled-coil domain-containing protein 113 isoform X3	CENTRIOLE	0	MOTILITY
XP_006065651	CCDC116	coiled-coil domain-containing protein 116 isoform X2		0
XP_006065650	CCDC116.1	coiled-coil domain-containing protein 116 isoform X1		0
XP_025147271	CCDC136	coiled-coil domain-containing protein 136 isoform X3	ACROSOME	0	FERTILIZATION
XP_006074449	CCDC136	coiled-coil domain-containing protein 136 isoform X2	ACROSOME	0	FERTILIZATION
XP_006074453	CCDC136.2	coiled-coil domain-containing protein 136 isoform X4	ACROSOME	0	FERTILIZATION
XP_006074448	CCDC136.3	coiled-coil domain-containing protein 136 isoform X1	ACROSOME	0	FERTILIZATION
XP_025147272	CCDC136.3	coiled-coil domain-containing protein 136 isoform X5	ACROSOME	0	FERTILIZATION
XP_025149247	CCDC151	coiled-coil domain-containing protein 151 isoform X1		0
XP_006063953	CCDC151.1	coiled-coil domain-containing protein 151 isoform X3		0
XP_006073663	CCIN	calicin		0
XP_006058445	CCT2	T-complex protein 1 subunit beta		0
XP_006052043	CCT3	T-complex protein 1 subunit gamma	SPERM HEAD	0	ZP BINDING
XP_006080923	CCT4	T-complex protein 1 subunit delta		0
XP_006062005	CCT5	T-complex protein 1 subunit epsilon		0
XP_006070409	CCT6A	T-complex protein 1 subunit zeta	SPERM HEAD	0	ZP BINDING
XP_025136854	CCT6B	T-complex protein 1 subunit zeta-2 isoform X5	TESTIS	0	SPERMATOGENESIS
XP_025136852	CCT6B.1	T-complex protein 1 subunit zeta-2 isoform X3	TESTIS	0	SPERMATOGENESIS
XP_025136855	CCT6B.2	T-complex protein 1 subunit zeta-2 isoform X6	TESTIS	0	SPERMATOGENESIS
XP_006045442	CCT6B.3	T-complex protein 1 subunit zeta-2 isoform X2	TESTIS	0	SPERMATOGENESIS
XP_006045441	CCT6B.4	T-complex protein 1 subunit zeta-2 isoform X1	TESTIS	0	SPERMATOGENESIS
XP_025136853	CCT6B.5	T-complex protein 1 subunit zeta-2 isoform X4	TESTIS	0	SPERMATOGENESIS
XP_006045987	CCT7	T-complex protein 1 subunit eta		0
XP_006056409	CCT8	T-complex protein 1 subunit theta isoform X1	GERM CELLS	0	SPERMATOGENESIS
XP_006056410	CCT8.1	T-complex protein 1 subunit theta isoform X2	GERM CELLS	0	SPERMATOGENESIS
XP_025130314	CCZ1	LOW QUALITY PROTEIN: vacuolar fusion protein CCZ1 homolog		0
XP_025143815	CD58	lymphocyte function-associated antigen 3 isoform X1		0
XP_025143816	CD58.1	lymphocyte function-associated antigen 3 isoform X2		0
XP_006068405	CDC37	hsp90 co-chaperone Cdc37		0
XP_006047326	CDO1	cysteine dioxygenase type 1 isoform X1		0
XP_025150355	CEP162	centrosomal protein of 162 kDa isoform X2		0
XP_006054804	CEP162.1	centrosomal protein of 162 kDa isoform X1		0
XP_025124482	CES5A	carboxylesterase 5A isoform X4	EPIDIDYMIS, SPP, SPERM PM	0	SPERM MATURATION, MOTILITY, CAPACITATION, MALE FERTILITY
XP_006072656	CFAP20	cilia- and flagella-associated protein 20	FLAGELLUM	0	MOTILITY, MALE FERTILITY
XP_025145355	CFAP99	cilia- and flagella-associated protein 99	FLAGELLUM	0	MOTILITY, MALE FERTILITY
XP_006056514	CFL1	cofilin-1		0
XP_025127592	CFL2	cofilin-2		0
XP_025150665	CGAS	cyclic GMP-AMP synthase isoform X2		0
XP_025150666	CGAS.1	cyclic GMP-AMP synthase isoform X3		0
XP_025150664	CGAS.2	cyclic GMP-AMP synthase isoform X1		0
XP_006073109	CHST14	carbohydrate sulfotransferase 14		0
XP_025127559	CKB	creatine kinase B-type	GERM CELLS	0	MALE FERTILITY
XP_006061115	CLIP4	CAP-Gly domain-containing linker protein 4		0
XP_006073660	CLTA	clathrin light chain A isoform X3	PERIPHERAL MEMBRANE PROTEIN	0	MOTILITY
XP_006073657	CLTA.1	clathrin light chain A isoform X1	PERIPHERAL MEMBRANE PROTEIN	0	MOTILITY
XP_006073658	CLTA.2	clathrin light chain A isoform X2	PERIPHERAL MEMBRANE PROTEIN	0	MOTILITY
XP_006064717	CNDP2	cytosolic non-specific dipeptidase		0
XP_006062505	COQ8A	atypical kinase COQ8A, mitochondrial isoform X1		0
XP_025141812	COQ8A.1	atypical kinase COQ8A, mitochondrial isoform X2		0
XP_025124503	COQ9	ubiquinone biosynthesis protein COQ9, mitochondrial		0
XP_025131392	CPPED1	serine/threonine-protein phosphatase CPPED1 isoform X3	SPERM SURFACE	0	MALE FERTILITY, MOTILITY
XP_006073701	CPPED1.1	serine/threonine-protein phosphatase CPPED1 isoform X2	TESTIS, SPERM HEAD	0	MALE FERTILITY, MOTILITY
XP_025131391	CPPED1.2	serine/threonine-protein phosphatase CPPED1 isoform X1	TESTIS, SPERM HEAD	0	MALE FERTILITY, MOTILITY
XP_025148498	CSNK1G2	casein kinase I isoform X1		0
XP_006049575	CUL3	cullin-3 isoform X2	TESTIS	0	APOPTOSIS, SPERMATOGENESIS, MALE FERTILITY
XP_006049573	CUL3.1	cullin-3 isoform X2	TESTIS	0	APOPTOSIS, SPERMATOGENESIS, MALE FERTILITY
XP_025134135	CUL3.2	cullin-3 isoform X1	TESTIS	0	APOPTOSIS, SPERMATOGENESIS, MALE FERTILITY
XP_025134137	CUL3.3	cullin-3 isoform X4	TESTIS	0	APOPTOSIS, SPERMATOGENESIS, MALE FERTILITY
XP_025134136	CUL3.4	cullin-3 isoform X3	TESTIS	0	APOPTOSIS, SPERMATOGENESIS, MALE FERTILITY
XP_006064636	CUTC	copper homeostasis protein cutC homolog isoform X3		0
XP_006064635	CUTC.1	copper homeostasis protein cutC homolog isoform X1		0
XP_025130110	CUTC.2	copper homeostasis protein cutC homolog isoform X2		0
XP_025137941	CYLC2	cylicin-2 isoform X2		0
XP_006046502	CYLC2.1	cylicin-2 isoform X1		0
XP_006062614	CYSRT1	cysteine-rich tail protein 1		0
XP_025148549	DAZAP1	DAZ-associated protein 1 isoform X3	TESTIS	0	SPERMATOGENESIS
XP_025148547	DAZAP1.1	DAZ-associated protein 1 isoform X1	TESTIS	0	SPERMATOGENESIS
XP_025148548	DAZAP1.2	DAZ-associated protein 1 isoform X2	TESTIS	0	SPERMATOGENESIS
XP_006068003	DCTN1	LOW QUALITY PROTEIN: dynactin subunit 1		0
XP_025139618	DCTN2	dynactin subunit 2 isoform X4	EPIDIDYMIS	0	SPERMATOGENESIS, FERTILIZATION
XP_025139621	DCTN2.1	dynactin subunit 2 isoform X6	EPIDIDYMIS	0	SPERMATOGENESIS, FERTILIZATION
XP_025139620	DCTN2.2	dynactin subunit 2 isoform X5	EPIDIDYMIS	0	SPERMATOGENESIS, FERTILIZATION
XP_025139615	DCTN2.3	dynactin subunit 2 isoform X1	EPIDIDYMIS	0	SPERMATOGENESIS, FERTILIZATION
XP_025139616	DCTN2.4	dynactin subunit 2 isoform X2	EPIDIDYMIS	0	SPERMATOGENESIS, FERTILIZATION
XP_025139617	DCTN2.5	dynactin subunit 2 isoform X3	EPIDIDYMIS	0	SPERMATOGENESIS, FERTILIZATION
XP_006060385	DDX21	nucleolar RNA helicase 2		0
XP_025120395	DEFB116	beta-defensin 116, partial	EPIDIDYMIS	0	SPERM MATURATION, SPERM PROTECTION
XP_006065542	DHRS11	dehydrogenase/reductase SDR family member 11 isoform X3	EPIDIDYMIS	0	GAMETE INTERACTION
XP_025136916	DHRS11.1	dehydrogenase/reductase SDR family member 11 isoform X1	EPIDIDYMIS	0	GAMETE INTERACTION
XP_025136917	DHRS11.2	dehydrogenase/reductase SDR family member 11 isoform X2	EPIDIDYMIS	0	GAMETE INTERACTION
XP_025136918	DHRS11.3	dehydrogenase/reductase SDR family member 11 isoform X4	EPIDIDYMIS	0	GAMETE INTERACTION
XP_006046486	DLD	dihydrolipoyl dehydrogenase, mitochondrial		0
XP_025126384	DNAH8	dynein heavy chain 8, axonemal	FLAGELLUM	0	MOTILITY
XP_006060517	DNAI1	dynein intermediate chain 1, axonemal	FLAGELLUM	0	MOTILITY
XP_025135196	DNAI2	dynein intermediate chain 2, axonemal	FLAGELLUM	0	MOTILITY
XP_025122222	DNAJB13	dnaJ homolog subfamily B member 13		0
XP_006071368	DNAL4	dynein light chain 4, axonemal isoform X4	FLAGELLUM	0	MOTILITY
XP_025138631	DNAL4.1	dynein light chain 4, axonemal isoform X3	FLAGELLUM	0	MOTILITY
XP_025138630	DNAL4.2	dynein light chain 4, axonemal isoform X2	FLAGELLUM	0	MOTILITY
XP_025138628	DNAL4.3	dynein light chain 4, axonemal isoform X1	FLAGELLUM	0	MOTILITY
XP_006077629	DNALI1	LOW QUALITY PROTEIN: axonemal dynein light intermediate polypeptide 1		0
XP_025134091	DNPEP	aspartyl aminopeptidase isoform X3	EPIDIDYMOSOMES	0	SPERM MATURATION
XP_025134090	DNPEP.1	aspartyl aminopeptidase isoform X1	EPIDIDYMOSOMES	0	SPERM MATURATION
XP_006059032	DNPEP.2	aspartyl aminopeptidase isoform X2	EPIDIDYMOSOMES	0	SPERM MATURATION
XP_025131692	DPP4	dipeptidyl peptidase 4 isoform X2	PROSTASOMES	0	MOTILITY
XP_025131698	DPP4.1	dipeptidyl peptidase 4 isoform X3	PROSTASOMES	0	MOTILITY
XP_006053017	DYNLL1	dynein light chain 1, cytoplasmic		0
XP_006076300	DYNLL2	dynein light chain 2, cytoplasmic		0
XP_025124222	DYNLRB2	dynein light chain roadblock-type 2 isoform X2		0
XP_006042013	DYNLRB2.1	dynein light chain roadblock-type 2 isoform X1		0
XP_006048613	EEF1A2	elongation factor 1-alpha 2		0
XP_006042595	EEF2	elongation factor 2		0
XP_006045455	EIF1AX	eukaryotic translation initiation factor 1A, X-chromosomal		0
XP_025129892	EIF3A	eukaryotic translation initiation factor 3 subunit A isoform X2		0
XP_006048513	EIF3A.1	eukaryotic translation initiation factor 3 subunit A isoform X1		0
XP_006060222	EIF5A	eukaryotic translation initiation factor 5A-1		0
XP_006067490	ELSPBP1	epididymal sperm-binding protein 1	EPIDIDYMOSOMES	0	MALE FERTILITY
XP_006076744	ENO1	alpha-enolase isoform X2	BODY,TAIL	0	MALE FERTILITY
XP_006076743	ENO1.1	alpha-enolase isoform X1	BODY,TAIL	0	MALE FERTILITY
XP_006065912	ENO2	gamma-enolase		0
XP_006060126	ENO3	beta-enolase isoform X1	CYTOPLASM	0	SPERM QUALITY, FREEZABILTY
XP_006060127	ENO3.1	beta-enolase isoform X2	CYTOPLASM	0	SPERM QUALITY, FREEZABILTY
XP_025120746	ENPP2	ectonucleotide pyrophosphatase/phosphodiesterase family member 2 isoform X4	SPERM PM	0	CAPACITATION
XP_025120744	ENPP2.1	ectonucleotide pyrophosphatase/phosphodiesterase family member 2 isoform X2	SPERM PM	0	CAPACITATION
XP_006074765	ENPP2.3	ectonucleotide pyrophosphatase/phosphodiesterase family member 2 isoform X9	SPERM PM	0	CAPACITATION
XP_006074764	ENPP2.4	ectonucleotide pyrophosphatase/phosphodiesterase family member 2 isoform X8	SPERM PM	0	CAPACITATION
XP_025120743	ENPP2.5	ectonucleotide pyrophosphatase/phosphodiesterase family member 2 isoform X1	SPERM PM	0	CAPACITATION
XP_025120749	ENPP2.6	ectonucleotide pyrophosphatase/phosphodiesterase family member 2 isoform X7	SPERM PM	0	CAPACITATION
XP_006074766	ENPP2.7	ectonucleotide pyrophosphatase/phosphodiesterase family member 2 isoform X10	SPERM PM	0	CAPACITATION
XP_025120747	ENPP2.8	ectonucleotide pyrophosphatase/phosphodiesterase family member 2 isoform X5	SPERM PM	0	CAPACITATION
XP_025150311	ENPP3	ectonucleotide pyrophosphatase/phosphodiesterase family member 3 isoform X1	SPERM PM	0	CAPACITATION
XP_025150312	ENPP3.1	ectonucleotide pyrophosphatase/phosphodiesterase family member 3 isoform X2	SPERM PM	0	CAPACITATION
XP_025138744	ERC1	ELKS/Rab6-interacting/CAST family member 1 isoform X6	PERIPHERAL MEMBRANE PROTEIN	0	MALE FERTILITY
XP_025138747	ERC1.1	ELKS/Rab6-interacting/CAST family member 1 isoform X9	PERIPHERAL MEMBRANE PROTEIN	0	MALE FERTILITY
XP_025138742	ERC1.2	ELKS/Rab6-interacting/CAST family member 1 isoform X4	PERIPHERAL MEMBRANE PROTEIN	0	MALE FERTILITY
XP_025138748	ERC1.3	ELKS/Rab6-interacting/CAST family member 1 isoform X10	PERIPHERAL MEMBRANE PROTEIN	0	MALE FERTILITY
XP_025138746	ERC1.4	ELKS/Rab6-interacting/CAST family member 1 isoform X8	PERIPHERAL MEMBRANE PROTEIN	0	MALE FERTILITY
XP_025138745	ERC1.5	ELKS/Rab6-interacting/CAST family member 1 isoform X7	PERIPHERAL MEMBRANE PROTEIN	0	MALE FERTILITY
XP_025138736	ERC1.6	ELKS/Rab6-interacting/CAST family member 1 isoform X1	PERIPHERAL MEMBRANE PROTEIN	0	MALE FERTILITY
XP_025138741	ERC1.7	ELKS/Rab6-interacting/CAST family member 1 isoform X3	PERIPHERAL MEMBRANE PROTEIN	0	MALE FERTILITY
XP_025138743	ERC1.8	ELKS/Rab6-interacting/CAST family member 1 isoform X5	PERIPHERAL MEMBRANE PROTEIN	0	MALE FERTILITY
XP_025138740	ERC1.9	ELKS/Rab6-interacting/CAST family member 1 isoform X2	PERIPHERAL MEMBRANE PROTEIN	0	MALE FERTILITY
XP_025128773	ERC2	ERC protein 2 isoform X2	CYTOPLASM	0	SPERMATOGENESIS
XP_025128776	ERC2.1	ERC protein 2 isoform X5	CYTOPLASM	0	SPERMATOGENESIS
XP_025128775	ERC2.2	ERC protein 2 isoform X4	CYTOPLASM	0	SPERMATOGENESIS
XP_025128778	ERC2.3	ERC protein 2 isoform X7	CYTOPLASM	0	SPERMATOGENESIS
XP_025128772	ERC2.4	ERC protein 2 isoform X1	CYTOPLASM	0	SPERMATOGENESIS
XP_025128774	ERC2.5	ERC protein 2 isoform X3	CYTOPLASM	0	SPERMATOGENESIS
XP_025128777	ERC2.6	ERC protein 2 isoform X6	CYTOPLASM	0	SPERMATOGENESIS
XP_025137594	ERP44	endoplasmic reticulum resident protein 44 isoform X2		0
XP_025141621	ESPN	espin		0
XP_006044468	ETFA	electron transfer flavoprotein subunit alpha, mitochondrial		0
XP_025151254	EXOC5	exocyst complex component 5 isoform X1		0
XP_006048751	EXOC5.1	exocyst complex component 5 isoform X2		0
XP_025150114	EZR	ezrin		0
NP_001277811	FABP3	fatty acid-binding protein, heart		0
XP_006049304	FAM136A	protein FAM136A		0
XP_006049448	FAM161A.1	protein FAM161A isoform X1	EPIDIDYMIS, EPIDYMOSOMES	0	MALE FERTILITY
XP_006049450	FAM161A.2	protein FAM161A isoform X2	EPIDIDYMIS, EPIDYMOSOMES	0	MALE FERTILITY
XP_006049452	FAM161A.3	protein FAM161A isoform X3	EPIDIDYMIS, EPIDYMOSOMES	0	MALE FERTILITY
XP_006044299	FAM205C	protein FAM205C isoform X1	SPERM PM	0	MALE FERTILITY
XP_025137439	FAM205C.1	protein FAM205C isoform X2	SPERM PM	0	MALE FERTILITY
XP_025137440	FAM205C.2	protein FAM205C isoform X3	SPERM PM	0	MALE FERTILITY
XP_025137441	FAM205C.3	protein FAM205C isoform X4	SPERM PM	0	MALE FERTILITY
XP_006075936	FAM71B	protein FAM71B	CYTOPLASM	0	MALE FERTILITY
XP_006056556	FAU	ubiquitin-like protein fubi and ribosomal protein S30		0
XP_006050097	FBL	rRNA 2'-O-methyltransferase fibrillarin		0
NP_001306727	FBP1	fructose-1,6-bisphosphatase 1		0
NP_001277795	FBP2	fructose-1,6-bisphosphatase isozyme 2		0
XP_006080240	FMR1	synaptic functional regulator FMR1 isoform X3	TESTIS	0	SPERMATOGENESIS
XP_006080246	FMR1.1	synaptic functional regulator FMR1 isoform X9	TESTIS	0	SPERMATOGENESIS
XP_006080239	FMR1.10	synaptic functional regulator FMR1 isoform X2	TESTIS	0	SPERMATOGENESIS
XP_006080238	FMR1.2	synaptic functional regulator FMR1 isoform X1	TESTIS	0	SPERMATOGENESIS
XP_006080242	FMR1.3	synaptic functional regulator FMR1 isoform X5	TESTIS	0	SPERMATOGENESIS
XP_006080247	FMR1.4	synaptic functional regulator FMR1 isoform X11	TESTIS	0	SPERMATOGENESIS
XP_025132851	FMR1.5	synaptic functional regulator FMR1 isoform X10	TESTIS	0	SPERMATOGENESIS
XP_006080245	FMR1.6	synaptic functional regulator FMR1 isoform X8	TESTIS	0	SPERMATOGENESIS
XP_006080244	FMR1.7	synaptic functional regulator FMR1 isoform X7	TESTIS	0	SPERMATOGENESIS
XP_006080241	FMR1.8	synaptic functional regulator FMR1 isoform X4	TESTIS	0	SPERMATOGENESIS
XP_006080243	FMR1.9	synaptic functional regulator FMR1 isoform X6	TESTIS	0	SPERMATOGENESIS
XP_025136871	FNDC8	fibronectin type III domain-containing protein 8 isoform X2		0
XP_006045426	FNDC8.1	fibronectin type III domain-containing protein 8 isoform X1		0
XP_006064763	FOLR2	folate receptor beta isoform X1	SPP	0	MALE FERTILITY, SPERM PROTECTION
XP_006064766	FOLR2.2	folate receptor beta isoform X3	SPP	0	MALE FERTILITY, SPERM PROTECTION
XP_006064767	FOLR2.3	folate receptor beta isoform X4	SPP	0	MALE FERTILITY, SPERM PROTECTION
XP_025127145	FSCB	fibrous sheath CABYR-binding protein		0
XP_006044341	FSCN1	fascin		0
XP_025129505	FSIP2	LOW QUALITY PROTEIN: fibrous sheath-interacting protein 2	FLAGELLUM	0	MALE FERTILITY
XP_025125262	FTL	ferritin light chain		0
XP_006060915	FUNDC2	FUN14 domain-containing protein 2		0
XP_006045325	GALK1	LOW QUALITY PROTEIN: galactokinase		0
XP_006065862	GAPDH	glyceraldehyde-3-phosphate dehydrogenase		0
XP_006043685	GDI1	rab GDP dissociation inhibitor alpha		0
XP_025136699	GLOD4	glyoxalase domain-containing protein 4 isoform X1		0
XP_006052771	GLOD4.1	glyoxalase domain-containing protein 4 isoform X2		0
XP_025144386	GOLIM4	Golgi integral membrane protein 4 isoform X3		0
XP_025144380	GOLIM4.1	Golgi integral membrane protein 4 isoform X2		0
XP_025144391	GOLIM4.2	Golgi integral membrane protein 4 isoform X4		0
XP_025144376	GOLIM4.3	Golgi integral membrane protein 4 isoform X1		0
NP_001277821	GOT1	aspartate aminotransferase, cytoplasmic		0
XP_025124812	GPI	glucose-6-phosphate isomerase		0
XP_025138145	GSN.1	gelsolin isoform X3	ACROSOME	0	ACROSOME REACTION
XP_025138144	GSN.2	gelsolin isoform X2	ACROSOME	0	ACROSOME REACTION
XP_006076917	HAGH	hydroxyacylglutathione hydrolase, mitochondrial		0
XP_006068864	HAUS5	HAUS augmin-like complex subunit 5		0
XP_006050021	HBA1	hemoglobin subunit alpha-4		0
XP_006049392	HDDC2	HD domain-containing protein 2		0
XP_006074671	HGFAC	hepatocyte growth factor activator isoform X2		0
XP_006072721	HINT1	histidine triad nucleotide-binding protein 1	EPIDIDYMIS	0	APOPTOSIS
XP_025137484	HINT2	histidine triad nucleotide-binding protein 2, mitochondrial isoform X2		0
XP_006042639	HINT3	histidine triad nucleotide-binding protein 3 isoform X1		0
XP_006042640	HINT3.1	histidine triad nucleotide-binding protein 3 isoform X2		0
XP_025150581	HINT3.2	histidine triad nucleotide-binding protein 3 isoform X3		0
XP_006057176	HIP1	LOW QUALITY PROTEIN: huntingtin-interacting protein 1		0
XP_006060379	HK1	hexokinase-1 isoform X1	EPIDIDYMOSOMES	0	GAMETE INTERACTION, MOTILITY
XP_025140432	HK1.1	hexokinase-1 isoform X2	EPIDIDYMOSOMES	0	GAMETE INTERACTION, MOTILITY
XP_006067964	HK2	hexokinase-2 isoform X1	EPIDIDYMOSOMES	0	GAMETE INTERACTION, MOTILITY
XP_006060380	HKDC1	putative hexokinase HKDC1		0
XP_006059447	HNRNPA0	heterogeneous nuclear ribonucleoprotein A0		0
XP_006063771	HNRNPA1	heterogeneous nuclear ribonucleoprotein A1 isoform X1		0
XP_025140097	HNRNPA1.1	heterogeneous nuclear ribonucleoprotein A1 isoform X2		0
XP_025147061	HNRNPA2B1	heterogeneous nuclear ribonucleoproteins A2/B1 isoform X3	SPERMATIDS	0	SPERMATOGENESIS
XP_025147062	HNRNPA2B1.1	heterogeneous nuclear ribonucleoproteins A2/B1 isoform X4	SPERMATIDS	0	SPERMATOGENESIS
XP_025147060	HNRNPA2B1.2	heterogeneous nuclear ribonucleoproteins A2/B1 isoform X1	SPERMATIDS	0	SPERMATOGENESIS
XP_025130169	HNRNPA3	heterogeneous nuclear ribonucleoprotein A3 isoform X2		0
XP_025130162	HNRNPA3.1	heterogeneous nuclear ribonucleoprotein A3 isoform X1		0
XP_025130174	HNRNPA3.2	heterogeneous nuclear ribonucleoprotein A3 isoform X3		0
XP_025148663	HNRNPAB	heterogeneous nuclear ribonucleoprotein A/B isoform X1		0
XP_025148665	HNRNPAB.1	heterogeneous nuclear ribonucleoprotein A/B isoform X2		0
XP_025151824	HNRNPC	heterogeneous nuclear ribonucleoproteins C1/C2 isoform X4	SPERMATIDS	0	SPERMATOGENESIS
XP_025151823	HNRNPC.1	heterogeneous nuclear ribonucleoproteins C1/C2 isoform X3	SPERMATIDS	0	SPERMATOGENESIS
XP_025151817	HNRNPC.2	heterogeneous nuclear ribonucleoproteins C1/C2 isoform X1	SPERMATIDS	0	SPERMATOGENESIS
XP_025151822	HNRNPC.3	heterogeneous nuclear ribonucleoproteins C1/C2 isoform X2	SPERMATIDS	0	SPERMATOGENESIS
XP_025145611	HNRNPDL	heterogeneous nuclear ribonucleoprotein D-like isoform X7		0
XP_025145602	HNRNPDL.1	heterogeneous nuclear ribonucleoprotein D-like isoform X1		0
XP_025145612	HNRNPDL.2	heterogeneous nuclear ribonucleoprotein D-like isoform X8		0
XP_025145613	HNRNPDL.3	heterogeneous nuclear ribonucleoprotein D-like isoform X9		0
XP_025145609	HNRNPDL.4	heterogeneous nuclear ribonucleoprotein D-like isoform X6		0
XP_025145603	HNRNPDL.5	heterogeneous nuclear ribonucleoprotein D-like isoform X2		0
XP_025145604	HNRNPDL.6	heterogeneous nuclear ribonucleoprotein D-like isoform X3		0
XP_025145605	HNRNPDL.7	heterogeneous nuclear ribonucleoprotein D-like isoform X4		0
XP_006050801	HNRNPF	heterogeneous nuclear ribonucleoprotein F		0
XP_025149736	HNRNPH1	heterogeneous nuclear ribonucleoprotein H isoform X9		0
XP_006058922	HNRNPH1.1	heterogeneous nuclear ribonucleoprotein H isoform X6		0
XP_006058920	HNRNPH1.2	heterogeneous nuclear ribonucleoprotein H isoform X2		0
XP_025149732	HNRNPH1.3	heterogeneous nuclear ribonucleoprotein H isoform X5		0
XP_025149729	HNRNPH1.4	heterogeneous nuclear ribonucleoprotein H isoform X1		0
XP_025149735	HNRNPH1.5	heterogeneous nuclear ribonucleoprotein H isoform X8		0
XP_025149733	HNRNPH1.6	heterogeneous nuclear ribonucleoprotein H isoform X7		0
XP_025149731	HNRNPH1.7	heterogeneous nuclear ribonucleoprotein H isoform X4		0
XP_025149730	HNRNPH1.8	heterogeneous nuclear ribonucleoprotein H isoform X3		0
XP_006051911	HNRNPH2	heterogeneous nuclear ribonucleoprotein H2		0
XP_006059160	HNRNPK	heterogeneous nuclear ribonucleoprotein K isoform X1	GERM CELLS, TESTIS	0	SPERMATOGENESIS
XP_006059161	HNRNPK.1	heterogeneous nuclear ribonucleoprotein K isoform X2	GERM CELLS, TESTIS	0	SPERMATOGENESIS
XP_025137738	HNRNPK.2	heterogeneous nuclear ribonucleoprotein K isoform X3	GERM CELLS, TESTIS	0	SPERMATOGENESIS
XP_006059162	HNRNPK.3	heterogeneous nuclear ribonucleoprotein K isoform X4	GERM CELLS, TESTIS	0	SPERMATOGENESIS
XP_025137739	HNRNPK.4	heterogeneous nuclear ribonucleoprotein K isoform X5	GERM CELLS, TESTIS	0	SPERMATOGENESIS
XP_025124865	HNRNPL	heterogeneous nuclear ribonucleoprotein L isoform X1		0
XP_025124866	HNRNPL.1	heterogeneous nuclear ribonucleoprotein L isoform X2		0
XP_025149146	HNRNPM	heterogeneous nuclear ribonucleoprotein M isoform X2	CYTOPLASM	0	SPERMATOGENESIS
XP_006046772	HNRNPM.1	heterogeneous nuclear ribonucleoprotein M isoform X3	CYTOPLASM	0	SPERMATOGENESIS
XP_025149154	HNRNPM.10	heterogeneous nuclear ribonucleoprotein M isoform X12	CYTOPLASM	0	SPERMATOGENESIS
XP_025149150	HNRNPM.11	heterogeneous nuclear ribonucleoprotein M isoform X7	CYTOPLASM	0	SPERMATOGENESIS
XP_006046773	HNRNPM.2	heterogeneous nuclear ribonucleoprotein M isoform X5	CYTOPLASM	0	SPERMATOGENESIS
XP_025149153	HNRNPM.3	heterogeneous nuclear ribonucleoprotein M isoform X11	CYTOPLASM	0	SPERMATOGENESIS
XP_006046774	HNRNPM.4	heterogeneous nuclear ribonucleoprotein M isoform X10	CYTOPLASM	0	SPERMATOGENESIS
XP_025149147	HNRNPM.5	heterogeneous nuclear ribonucleoprotein M isoform X4	CYTOPLASM	0	SPERMATOGENESIS
XP_025149149	HNRNPM.6	heterogeneous nuclear ribonucleoprotein M isoform X6	CYTOPLASM	0	SPERMATOGENESIS
XP_025149151	HNRNPM.7	heterogeneous nuclear ribonucleoprotein M isoform X8	CYTOPLASM	0	SPERMATOGENESIS
XP_025149145	HNRNPM.8	heterogeneous nuclear ribonucleoprotein M isoform X1	CYTOPLASM	0	SPERMATOGENESIS
XP_025149152	HNRNPM.9	heterogeneous nuclear ribonucleoprotein M isoform X9	CYTOPLASM	0	SPERMATOGENESIS
XP_006063589	HNRNPU	heterogeneous nuclear ribonucleoprotein U isoform X1		0
XP_006063591	HNRNPU.1	heterogeneous nuclear ribonucleoprotein U isoform X2		0
XP_025127285	HSP90AA1	heat shock protein HSP 90-alpha	TESTIS, FLAGELLUM, SPP	0	SPERM PROTECTION, MOTILITY, FERTILIZATION
XP_006069362	HSP90AB1	heat shock protein HSP 90-beta	TESTIS, FLAGELLUM, SPP	0	SPERM PROTECTION, MOTILITY, FERTILIZATION
XP_006041952	HSPA1L	heat shock 70 kDa protein 1-like	SPERM SURFACE	0	SPERM PROTECTION, MOTILITY, MALE FERTILITY
XP_006072201	HSPA2	heat shock-related 70 kDa protein 2	SPERM SURFACE	0	SPERM PROTECTION, MOTILITY, MALE FERTILITY
XP_006065134	HSPA4	heat shock 70 kDa protein 4	SPERM SURFACE	0	SPERM PROTECTION, MOTILITY, MALE FERTILITY
XP_025123823	HSPA4L	heat shock 70 kDa protein 4L isoform X2	SPERM SURFACE	0	SPERM PROTECTION, MOTILITY, MALE FERTILITY
XP_006041196	HSPA6	heat shock 70 kDa protein 6	SPERM SURFACE	0	SPERM PROTECTION, MOTILITY, MALE FERTILITY
XP_006072590	HSPA8	heat shock cognate 71 kDa protein		0
XP_006070901	HSPA9	stress-70 protein, mitochondrial		0
XP_006057191	HSPB1	heat shock protein beta-1	TESTIS, FLAGELLUM, SPP	0	SPERM PROTECTION, MOTILITY, FERTILIZATION
XP_025135916	HSPB9	heat shock protein beta-9		0
XP_006078222	HSPD1	60 kDa heat shock protein, mitochondrial		0
XP_025118688	HSPH1	heat shock protein 105 kDa isoform X2		0
XP_006053749	HSPH1.1	heat shock protein 105 kDa isoform X1		0
XP_006053748	HSPH1.2	heat shock protein 105 kDa isoform X3		0
XP_025124049	HYDIN	LOW QUALITY PROTEIN: hydrocephalus-inducing protein homolog		0
XP_025124026	IGLL1	immunoglobulin lambda-like polypeptide 1		0
XP_025125799	IL4I1.2	L-amino-acid oxidase isoform X1	SPERM HEAD	0	CAPACITATION, ACROSOME REACTION, SPERM PROTECTION
XP_006074768	IMPA1	inositol monophosphatase 1 isoform X2	TESTIS	0	MOTILITY, CAPACITATION, ACROSOME REACTION
XP_006074767	IMPA1.1	inositol monophosphatase 1 isoform X1	TESTIS	0	MOTILITY, CAPACITATION, ACROSOME REACTION
XP_025147622	IQCA1L	IQ and AAA domain-containing protein 1-like		0
XP_006045068	IQCF1	IQ domain-containing protein F1		0
XP_025149641	IQCN	LOW QUALITY PROTEIN: IQ domain-containing protein N		0
XP_006058022	ISYNA1	inositol-3-phosphate synthase 1		0
XP_025135927	KLHL10	kelch-like protein 10 isoform X1		0
XP_006055837	KLHL10.1	kelch-like protein 10 isoform X2		0
XP_025136030	KPNB1	importin subunit beta-1		0
XP_006046659	KRT1	keratin, type II cytoskeletal 1		0
XP_006068700	KRT10	keratin, type I cytoskeletal 10 isoform X2		0
XP_025135946	KRT10.1	keratin, type I cytoskeletal 10 isoform X1		0
XP_006068701	KRT12	LOW QUALITY PROTEIN: keratin, type I cytoskeletal 12		0
XP_006041554	KRT13	keratin, type I cytoskeletal 13		0
XP_006041555	KRT15	keratin, type I cytoskeletal 15		0
XP_006046668	KRT18	keratin, type I cytoskeletal 18		0
XP_006041556	KRT19	keratin, type I cytoskeletal 19		0
XP_006046658	KRT2	keratin, type II cytoskeletal 2 epidermal isoform X1		0
XP_025138245	KRT2.1	keratin, type II cytoskeletal 2 epidermal isoform X2		0
XP_006068696	KRT24	keratin, type I cytoskeletal 24 isoform X1		0
XP_025135949	KRT24.1	keratin, type I cytoskeletal 24 isoform X2		0
XP_006068697	KRT25	keratin, type I cytoskeletal 25		0
XP_006068699	KRT27	LOW QUALITY PROTEIN: keratin, type I cytoskeletal 27		0
XP_025135947	KRT28	LOW QUALITY PROTEIN: keratin, type I cytoskeletal 28		0
XP_006046663	KRT3	keratin, type II cytoskeletal 3		0
XP_006041550	KRT32	keratin, type I cuticular Ha2		0
XP_006041551	KRT35	LOW QUALITY PROTEIN: keratin, type I cuticular Ha5		0
XP_006041552	KRT36	keratin, type I cuticular Ha6		0
XP_006046662	KRT4	keratin, type II cytoskeletal 4		0
XP_006043425	KRT40	keratin, type I cytoskeletal 40		0
XP_006046651	KRT5	keratin, type II cytoskeletal 5		0
XP_006058536	KRT7	keratin, type II cytoskeletal 7		0
XP_006063995	LAP3	cytosol aminopeptidase		0
XP_006072613	LCP1	plastin-2		0
XP_006067703	LDHB	L-lactate dehydrogenase B chain isoform X1	TESTIS, SPERM HEAD, MID-PIECE, SPP	0	MALE FERTILITY
NP_001277776	LDHB.1	L-lactate dehydrogenase B chain	TESTIS, SPERM HEAD, MID-PIECE, SPP	0	MALE FERTILITY
XP_025124939	LIPE	hormone-sensitive lipase isoform X1	TESTIS	0	SPERMATOGENESIS, MALE FERTILITY
XP_006041293	LIPE.1	hormone-sensitive lipase isoform X3	TESTIS	0	SPERMATOGENESIS, MALE FERTILITY
XP_006041291	LIPE.2	hormone-sensitive lipase isoform X2	TESTIS	0	SPERMATOGENESIS, MALE FERTILITY
XP_006073420	LMNB1	LOW QUALITY PROTEIN: lamin-B1		0
XP_006048086	LOC102389168	histone H2A type 1-B/E		0
XP_006073746	LOC102389195	non-histone chromosomal protein HMG-17		0
XP_006041549	LOC102389471	keratin, type I microfibrillar 48 kDa, component 8C-1		0
XP_006048087	LOC102389499	histone H2B type 1-B		0
XP_006077823	LOC102389641	histone H2B type F-S-like		0
XP_025133680	LOC102389646	elongation factor 1-alpha 1		0
XP_025151839	LOC102389658	adenylosuccinate lyase-like		0
XP_025152105	LOC102389822	histone H2A type 1-D-like		0
XP_006048088	LOC102390145	histone H1.2		0
XP_006048090	LOC102390920	histone H1.1		0
XP_025152313	LOC102391114	olfactory receptor 4K3-like		0
XP_006055340	LOC102391189	cytochrome c		0
XP_006062470	LOC102391458	LOW QUALITY PROTEIN: olfactory receptor 4K3-like		0
XP_006078744	LOC102392520	histone H2AX		0
XP_006041559	LOC102393197	keratin, type I cuticular Ha8		0
XP_025134937	LOC102393597	clusterin-like		0
XP_025130746	LOC102393607	ATP-binding cassette sub-family A member 17 isoform X1	SPERM HEAD, TAIL	0	CAPACITATION
XP_025130747	LOC102393607.1	ATP-binding cassette sub-family A member 17 isoform X2	SPERM HEAD, TAIL	0	CAPACITATION
XP_025130748	LOC102393607.2	ATP-binding cassette sub-family A member 17 isoform X3	SPERM HEAD, TAIL	0	CAPACITATION
XP_025122420	LOC102394107	histone H2B type 1-A-like		0
XP_006051280	LOC102394425	histone H2B type 1-A		0
XP_025123309	LOC102394973	disintegrin and metalloproteinase domain-containing protein 1	SPERM SURFACE	0	SPERM MATURATION, SPERMATOGENESIS
XP_025122814	LOC102394992	caspase-13		0
XP_025119870	LOC102395293	dihydrodiol dehydrogenase 3		0
XP_025152195	LOC102395477	uncharacterized protein LOC102395477		0
XP_025147126	LOC102395706	histone H2A.V		0
XP_025119872	LOC102395957	aldo-keto reductase family 1 member C23-like protein isoform X2		0
XP_025119871	LOC102395957.1	prostaglandin F synthase 1 isoform X1	TESTIS	0	SPERMATOGENESIS
XP_006078368	LOC102395957.2	prostaglandin F synthase 1 isoform X3	TESTIS	0	SPERMATOGENESIS
XP_006062480	LOC102395983	histone H3.3C-like		0
XP_006054995	LOC102396450	histone H3.3-like		0
XP_025119876	LOC102396460	LOW QUALITY PROTEIN: dihydrodiol dehydrogenase 3-like		0
XP_025128177	LOC102396653	uncharacterized protein LOC102396653		0
XP_025119165	LOC102396695	trophoblast Kunitz domain protein 1-like isoform X2		0
XP_025119164	LOC102396695.1	trophoblast Kunitz domain protein 1-like isoform X1		0
XP_025119877	LOC102396772	dihydrodiol dehydrogenase 3 isoform X2	TESTIS	0	SPERMATOGENESIS
XP_006078369	LOC102396772.1	dihydrodiol dehydrogenase 3 isoform X1	TESTIS	0	SPERMATOGENESIS
XP_025120488	LOC102396848	LOW QUALITY PROTEIN: small integral membrane protein 20-like		0
XP_025129581	LOC102396919	heterogeneous nuclear ribonucleoprotein A1-like		0
XP_006059042	LOC102397197	tubulin alpha-1D chain		0
XP_006055848	LOC102397396	keratin, type I cytoskeletal 17		0
XP_025120226	LOC102397502	intestinal-type alkaline phosphatase-like		0
XP_006055849	LOC102397719	keratin, type I cytoskeletal 42		0
XP_025136708	LOC102397816	diazepam-binding inhibitor-like 5		0
XP_025148251	LOC102397864	sperm-associated acrosin inhibitor-like isoform X1	SPP, SPERM SURFACE	0	GAMETE INTERACTION
XP_025148252	LOC102397864.2	sperm-associated acrosin inhibitor-like isoform X2	SPP, SPERM SURFACE	0	GAMETE INTERACTION
XP_006042663	LOC102397875	spleen trypsin inhibitor I-like		0
XP_025132121	LOC102397898	cancer/testis antigen 47A		0
XP_006051755	LOC102397920	protein S100-A12		0
XP_025147573	LOC102398005	GTPase IMAP family member 7-like		0
XP_006055851	LOC102398359	keratin, type I cytoskeletal 14		0
XP_025132151	LOC102398514	cancer/testis antigen 47A-like isoform X2		0
XP_006043352	LOC102398514.1	cancer/testis antigen 47A-like isoform X1		0
XP_025126645	LOC102398732	beta-hexosaminidase subunit beta-like isoform X3		0
XP_006050022	LOC102398760	hemoglobin subunit alpha-2		0
XP_006078371	LOC102398800	dihydrodiol dehydrogenase 3-like	TESTIS	0	SPERMATOGENESIS
XP_025119881	LOC102399119	dihydrodiol dehydrogenase 3-like isoform X3	TESTIS	0	SPERMATOGENESIS
XP_025119880	LOC102399119.1	dihydrodiol dehydrogenase 3-like isoform X2	TESTIS	0	SPERMATOGENESIS
XP_006078372	LOC102399119.2	dihydrodiol dehydrogenase 3-like isoform X1	TESTIS	0	SPERMATOGENESIS
XP_025148788	LOC102399131	LOW QUALITY PROTEIN: zinc finger protein 474		0
XP_006075619	LOC102399966	ubiquitin-60S ribosomal protein L40		0
XP_006054596	LOC102399969	tubulin alpha-1B chain		0
XP_025119885	LOC102399987.1	dihydrodiol dehydrogenase 3 isoform X4	TESTIS	0	SPERMATOGENESIS
XP_025129304	LOC102400287	myosin regulatory light chain 12B		0
XP_025151963	LOC102400351	histone H2A type 1-J		0
XP_025145318	LOC102400605	LOW QUALITY PROTEIN: mucin-2		0
XP_006078376	LOC102400645	dihydrodiol dehydrogenase 3-like isoform X4	TESTIS	0	SPERMATOGENESIS
XP_025119891	LOC102400645.1	dihydrodiol dehydrogenase 3-like isoform X5	TESTIS	0	SPERMATOGENESIS
XP_025119890	LOC102400645.2	prostaglandin F synthase 1-like isoform X3	TESTIS	0	SPERMATOGENESIS
XP_025119892	LOC102400645.5	prostaglandin F synthase 1-like isoform X6	TESTIS	0	SPERMATOGENESIS
XP_006066107	LOC102400686	histone H2A.Z		0
XP_025134943	LOC102400687	histone H2B type 1-N-like		0
XP_025121296	LOC102400785	40S ribosomal protein S6		0
XP_006071913	LOC102400830	myosin regulatory light polypeptide 9 isoform X1		0
XP_006071914	LOC102400830.1	myosin regulatory light polypeptide 9 isoform X2		0
XP_025137597	LOC102400925	LOW QUALITY PROTEIN: putative serine protease 47		0
XP_006075303	LOC102401704	60S ribosomal protein L17		0
XP_006055195	LOC102402131	histone H2A.J		0
XP_025121222	LOC102402179	histone H3.3C		0
XP_025148257	LOC102403067	seminal plasma acrosin inhibitor A1-like isoform X2		0
XP_025148256	LOC102403067.2	seminal plasma acrosin inhibitor A1-like isoform X1		0
XP_025125571	LOC102403160	uncharacterized protein LOC102403160		0
XP_006048328	LOC102403292	calmodulin-like		0
XP_006063934	LOC102403366	heterogeneous nuclear ribonucleoproteins A2/B1		0
XP_025120517	LOC102404200	histone H2B type 1-F/J/L-like		0
XP_006063275	LOC102404341	histone H2B type 3-B		0
XP_006063276	LOC102404666	histone H2A type 3		0
XP_025119894	LOC102404780.1	prostaglandin F synthase 1-like isoform X1		0
XP_025130329	LOC102404894	sulfotransferase 1A1		0
XP_025133679	LOC102405091	LOW QUALITY PROTEIN: dynein intermediate chain 2, axonemal-like, partial		0
XP_025138945	LOC102405126	c-Myc-binding protein		0
XP_006059757	LOC102405405	histone H2B type 2-E-like		0
XP_025141328	LOC102405684	torsin-1A-interacting protein 2		0
XP_006051403	LOC102405698	WAP four-disulfide core domain protein 10A	EPIDIDYMIS	0	SPERM MATURATION, SPERM PROTECTION
XP_006054375	LOC102406031	cytosolic 5'-nucleotidase 1B isoform X2		0
XP_025117313	LOC102406031	cytosolic 5'-nucleotidase 1B isoform X1		0
XP_006046136	LOC102406199	histone H3.3		0
XP_025133608	LOC102406359	four and a half LIM domains protein 1, partial		0
XP_006078224	LOC102406576	10 kDa heat shock protein, mitochondrial isoform X2		0
XP_025149964	LOC102406582	olfactory receptor 10H3-like		0
XP_006074042	LOC102406674	histone H4-like		0
XP_006075642	LOC102406886	olfactory receptor 4K14-like		0
XP_006048062	LOC102407809	histone H2B type 1-J-like		0
XP_025140017	LOC102407869	keratin, type II cytoskeletal 6A		0
XP_006048063	LOC102408136	histone H2A type 1-H		0
XP_025127773	LOC102408153	histone H2B type 1-like		0
XP_025140016	LOC102408195	keratin, type II cytoskeletal 6A-like		0
XP_006054541	LOC102408396	lysophosphatidylcholine acyltransferase 2B-like	SPP	0	CAPACITATION
XP_025152033	LOC102408478	histone H2B type 1-K		0
XP_025126064	LOC102408709	heterogeneous nuclear ribonucleoprotein C-like		0
XP_006048065	LOC102408803	histone H1.4		0
XP_025152011	LOC102409122	histone H2B type 1-M		0
XP_006061855	LOC102409414	LOW QUALITY PROTEIN: fatty acid synthase		0
XP_006041955	LOC102409533	heat shock 70 kDa protein 1A		0
XP_006074052	LOC102409593	dynein light chain 1, cytoplasmic-like		0
XP_006054002	LOC102409600	LOW QUALITY PROTEIN: elongation factor 1-alpha, oocyte form		0
XP_025142100	LOC102409611.1	serum amyloid A protein isoform X4	TESTIS, SPP	0	MALE FERTILITY
XP_025152210	LOC102409669	histone H3.1-like		0
XP_006061856	LOC102409754	protein NDRG3-like		0
XP_025148552	LOC102409912	PWWP domain-containing protein MUM1 isoform X1		0
XP_006050578	LOC102409912.1	PWWP domain-containing protein MUM1 isoform X2		0
XP_006045701	LOC102409993	histone H2B type 1-N		0
XP_006048070	LOC102410341	histone H1.4-like		0
XP_025151801	LOC102410659	histone H1.5		0
XP_006070398	LOC102410676	beta-glucuronidase		0
XP_006052413	LOC102410916.1	BOLA class I histocompatibility antigen, alpha chain BL3-7 isoform X3	SPERM PM	0	IMMUNOMODULATION, MALE FERTILITY
XP_025124995	LOC102411025	carcinoembryonic antigen-related cell adhesion molecule 21-like	SPERM PM	0	IMMUNOMODULATION, MALE FERTILITY
XP_025120766	LOC102411164	tubulin beta-2B chain isoform X2		0
XP_025120761	LOC102411164.1	tubulin beta-2B chain isoform X1		0
XP_025150308	LOC102411389.3	pantetheinase isoform X5	SPP	0	SPERM PROTECTION, OVIDUCTAL EPITHELIAL CELL BINDING
XP_025150310	LOC102411389.5	pantetheinase isoform X7	SPP	0	SPERM PROTECTION, OVIDUCTAL EPITHELIAL CELL BINDING
XP_025127213	LOC102411401.1	serpin A3-8-like isoform X5	EPIDIDYMIS	0	CAPACITATION
XP_025127215	LOC102411401.2	serpin A3-8-like isoform X7	EPIDIDYMIS	0	CAPACITATION
XP_025127210	LOC102411401.3	serpin A3-6-like isoform X2	EPIDIDYMIS	0	CAPACITATION
XP_025127218	LOC102411401.4	serpin A3-8-like isoform X9	EPIDIDYMIS	0	CAPACITATION
XP_025127214	LOC102411401.5	serpin A3-8-like isoform X6	EPIDIDYMIS	0	CAPACITATION
XP_025127211	LOC102411401.6	serpin A3-8-like isoform X3	EPIDIDYMIS	0	CAPACITATION
XP_025127209	LOC102411401.7	serpin A3-8-like isoform X1	EPIDIDYMIS	0	CAPACITATION
XP_025127212	LOC102411401.8	serpin A3-8-like isoform X4	EPIDIDYMIS	0	CAPACITATION
XP_006049257	LOC102411450	histone H2B type 2-F		0
XP_025133354	LOC102411503	cancer/testis antigen 47A-like		0
XP_006069795	LOC102411662	40S ribosomal protein S25		0
XP_006049258	LOC102411789	uncharacterized protein LOC102411789		0
XP_025120572	LOC102411924	heat shock cognate 71 kDa protein-like		0
XP_025152187	LOC102411988	uncharacterized protein LOC102411988		0
XP_006056123	LOC102412044	L-lactate dehydrogenase A chain isoform X2		0
XP_025142095	LOC102412044.1	L-lactate dehydrogenase A chain isoform X1		0
XP_025143734	LOC102412113	histone H4		0
XP_025149877	LOC102412183	histone H3.1		0
XP_006048076	LOC102412313	histone H1.3		0
XP_006056125	LOC102412587	L-lactate dehydrogenase C chain isoform X1		0
XP_025136488	LOC102412702	uncharacterized protein LOC102412702 isoform X3		0
XP_025136489	LOC102412702.1	uncharacterized protein LOC102412702 isoform X4		0
XP_006060226	LOC102412702.2	uncharacterized protein LOC102412702 isoform X2		0
XP_025136487	LOC102412702.3	uncharacterized protein LOC102412702 isoform X1		0
XP_025136490	LOC102412702.4	uncharacterized protein LOC102412702 isoform X5		0
XP_025123038	LOC102412993.1	glutathione hydrolase 1 proenzyme isoform X2		0
XP_006049262	LOC102413094	histone H2A type 2-A		0
XP_006048078	LOC102413318	histone H2B type 1		0
XP_025122971	LOC102413407	tubulin alpha-3 chain		0
XP_025146655	LOC102413516	histone H2B type 1-like isoform X1		0
XP_006065981	LOC102413516.1	histone H2B type 1-like isoform X2		0
XP_006048079	LOC102413645	LOW QUALITY PROTEIN: histone H3.1		0
XP_006046920	LOC102413729	caltrin		0
XP_025143731	LOC102414060	LOW QUALITY PROTEIN: histone H3-like		0
XP_006049265	LOC102414399	histone H2B type 2-E		0
XP_025139866	LOC102414462	tubulin alpha-1A chain		0
XP_006048081	LOC102414630	histone H2A type 1-C		0
XP_006049266	LOC102414738	histone H2A type 2-C		0
XP_025127227	LOC102414740	serpin A3-1 isoform X1	EPIDIDYMIS	0	IMMUNOMODULATION
XP_025128153	LOC102414870	histone H3.3-like, partial		0
XP_006049267	LOC102415072	histone H2A type 2-B		0
XP_006068865	LOC102415619	tubulin alpha-1A chain-like		0
XP_025140015	LOC102416114	LOW QUALITY PROTEIN: keratin, type II cytoskeletal 75		0
XP_025148992	LOC112577600	small integral membrane protein 20		0
XP_025119866	LOC112577774	ferritin heavy chain		0
XP_025120516	LOC112578930	tissue factor pathway inhibitor-like	SPP	0	MALE FERTILITY
XP_025121366	LOC112579230	glycosyl-phosphatidylinositol-anchored molecule-like protein		0
XP_025121371	LOC112579232	glycosyl-phosphatidylinositol-anchored molecule-like protein isoform X2		0
XP_025121370	LOC112579232.1	glycosyl-phosphatidylinositol-anchored molecule-like protein isoform X1		0
XP_025123308	LOC112579917	LOW QUALITY PROTEIN: disintegrin and metalloproteinase domain-containing protein 1a-like		0
XP_025123310	LOC112579918	disintegrin and metalloproteinase domain-containing protein 1a-like		0
XP_025128789	LOC112581264	polyubiquitin-B		0
XP_025130069	LOC112581627	cytochrome c 2		0
XP_025131636	LOC112582018	brain acid soluble protein 1		0
XP_025133338	LOC112582673	ectonucleotide pyrophosphatase/phosphodiesterase family member 2-like		0
XP_025133353	LOC112582684	LOW QUALITY PROTEIN: cancer/testis antigen 47A-like, partial		0
XP_025133673	LOC112582867	dynein intermediate chain 2, axonemal-like		0
XP_025134803	LOC112583463	uncharacterized protein LOC112583463		0
XP_025135696	LOC112583653	histone H2B type 1-L-like		0
XP_025138182	LOC112584007	LOW QUALITY PROTEIN: fatty acid synthase-like, partial		0
XP_025139868	LOC112584592	tubulin alpha-1C chain		0
XP_025141775	LOC112585098	60S ribosomal protein L9		0
XP_025142334	LOC112585202	testis-expressed protein 54-like		0
XP_025147624	LOC112586636	late histone H2B.L4-like		0
XP_025150005	LOC112587282	ubiquitin	SPP, SPERM SURFACE	0	MALE FERTILITY
XP_025151779	LOC112587877	inactive ribonuclease-like protein 9		0
XP_025151913	LOC112587905	histone H2A type 1-D		0
XP_025151956	LOC112587908	histone H2A type 1		0
XP_006065877	LPAR5	lysophosphatidic acid receptor 5		0
XP_006078321	LRCOL1	leucine-rich colipase-like protein 1 isoform X3	EPIDIDYMIS	0	MALE FERTILITY
XP_025123676	LRCOL1.1	leucine-rich colipase-like protein 1 isoform X2	EPIDIDYMIS	0	MALE FERTILITY
XP_025123675	LRCOL1.3	leucine-rich colipase-like protein 1 isoform X1	EPIDIDYMIS	0	MALE FERTILITY
XP_006070216	LUC7L3	LOW QUALITY PROTEIN: luc7-like protein 3		0
XP_006064816	LUZP2.2	leucine zipper protein 2 isoform X3	SPP, SPERM SURFACE	0	SPERM PROTECTION, IMMUNOMODULATION
XP_025124987	LYPD4	ly6/PLAUR domain-containing protein 4 isoform X3	TESTIS, ACROSOME	0	GAMETE INTERACTION, MALE FERTILITY
XP_025124989	LYPD4.2	ly6/PLAUR domain-containing protein 4 isoform X5	TESTIS, ACROSOME	0	GAMETE INTERACTION, MALE FERTILITY
XP_025124986	LYPD4.3	ly6/PLAUR domain-containing protein 4 isoform X1	TESTIS, ACROSOME	0	GAMETE INTERACTION, MALE FERTILITY
XP_025140386	MAATS1	cilia- and flagella-associated protein 91 isoform X2		0
XP_025140389	MAATS1.1	cilia- and flagella-associated protein 91 isoform X3		0
XP_006057662	MAATS1.2	cilia- and flagella-associated protein 91 isoform X1		0
XP_006062991	MAP3K19	mitogen-activated protein kinase kinase kinase 19 isoform X2		0
XP_006062989	MAP3K19.1	mitogen-activated protein kinase kinase kinase 19 isoform X1		0
XP_025148402	MATR3	matrin-3 isoform X1		0
XP_025148406	MATR3.1	matrin-3 isoform X3		0
XP_025148405	MATR3.2	matrin-3 isoform X2		0
XP_006056821	MCM3	DNA replication licensing factor MCM3		0
XP_006075671	MDH1	malate dehydrogenase, cytoplasmic	SPP, TAIL, MID-PIECE	0	MALE FERTILITY
NP_001277813	MDH2	malate dehydrogenase, mitochondrial		0
XP_025150607	ME1	NADP-dependent malic enzyme		0
XP_006048177	MIF	macrophage migration inhibitory factor	EPIDIDYMOSOMES	0	IMMUNOMODULATION, GAMETE INTERACTION
XP_025123282	MLEC	malectin isoform X2		0
XP_006046927	MME	neprilysin isoform X2	SPP	0	FERTILIZATION
XP_025145296	MME.1	neprilysin isoform X1	SPP	0	FERTILIZATION
XP_006057043	MPST	3-mercaptopyruvate sulfurtransferase isoform X1	TESTIS	0	SPERMATOGENESIS, SPERM PROTECTION, SPERM MATURATION
XP_006057044	MPST.1	3-mercaptopyruvate sulfurtransferase isoform X1	TESTIS	0	SPERMATOGENESIS, SPERM PROTECTION, SPERM MATURATION
XP_025121775	MS4A14	membrane-spanning 4-domains subfamily A member 14		0
XP_025136382	MYH10	myosin-10 isoform X4		0
XP_025136376	MYH10.1	myosin-10 isoform X1		0
XP_025136381	MYH10.2	myosin-10 isoform X3		0
XP_025136380	MYH10.3	myosin-10 isoform X2		0
XP_025139302	MYH9	myosin-9		0
XP_025139528	MYL6	myosin light polypeptide 6 isoform X1	CYTOPLASM	0	SPERMATOGENESIS
XP_006075109	MYL6.1	myosin light polypeptide 6 isoform X2	CYTOPLASM	0	SPERMATOGENESIS
XP_025151394	MYO5A	unconventional myosin-Va isoform X3	NECK, TAIL	0	MOTILITY
XP_025151393	MYO5A.1	unconventional myosin-Va isoform X2	NECK, TAIL	0	MOTILITY
XP_025151396	MYO5A.2	unconventional myosin-Va isoform X5	NECK, TAIL	0	MOTILITY
XP_025151395	MYO5A.3	unconventional myosin-Va isoform X4	NECK, TAIL	0	MOTILITY
XP_025151399	MYO5A.4	unconventional myosin-Va isoform X8	NECK, TAIL	0	MOTILITY
XP_025151397	MYO5A.5	unconventional myosin-Va isoform X6	NECK, TAIL	0	MOTILITY
XP_025151398	MYO5A.6	unconventional myosin-Va isoform X7	NECK, TAIL	0	MOTILITY
XP_025151392	MYO5A.7	unconventional myosin-Va isoform X1	NECK, TAIL	0	MOTILITY
XP_006041928	NCL	nucleolin		0
XP_006072344	NCOA3	nuclear receptor coactivator 3 isoform X4	NUCLEUS	0	MALE FERTILITY
XP_025119113	NCOA3.1	nuclear receptor coactivator 3 isoform X3	NUCLEUS	0	MALE FERTILITY
XP_006072343	NCOA3.2	nuclear receptor coactivator 3 isoform X2	NUCLEUS	0	MALE FERTILITY
XP_025119112	NCOA3.3	nuclear receptor coactivator 3 isoform X1	NUCLEUS	0	MALE FERTILITY
XP_025119305	NDRG3	protein NDRG3 isoform X3	TESTIS	0	SPERMATOGENESIS
XP_025119307	NDRG3.1	protein NDRG3 isoform X5	TESTIS	0	SPERMATOGENESIS
XP_025119308	NDRG3.2	protein NDRG3 isoform X6	TESTIS	0	SPERMATOGENESIS
XP_025119303	NDRG3.3	protein NDRG3 isoform X2	TESTIS	0	SPERMATOGENESIS
XP_025119302	NDRG3.4	protein NDRG3 isoform X1	TESTIS	0	SPERMATOGENESIS
XP_025119306	NDRG3.5	protein NDRG3 isoform X4	TESTIS	0	SPERMATOGENESIS
XP_006043343	NEDD8	NEDD8	SPP	0	EMBRYONIC DEVELOPMENT
XP_025146904	NME8	thioredoxin domain-containing protein 3 isoform X2	GERM CELLS, TESTIS, EPIDIDYMIS	0	SPERMATOGENESIS, MOTILITY
XP_025146905	NME8.1	thioredoxin domain-containing protein 3 isoform X3	GERM CELLS, TESTIS, EPIDIDYMIS	0	SPERMATOGENESIS, MOTILITY
XP_025146903	NME8.2	thioredoxin domain-containing protein 3 isoform X1	GERM CELLS, TESTIS, EPIDIDYMIS	0	SPERMATOGENESIS, MOTILITY
XP_025146906	NME8.3	thioredoxin domain-containing protein 3 isoform X4	GERM CELLS, TESTIS, EPIDIDYMIS	0	SPERMATOGENESIS, MOTILITY
XP_006079491	NONO	non-POU domain-containing octamer-binding protein		0
XP_025126628	NPM1	nucleophosmin isoform X2		0
XP_025126627	NPM1.1	nucleophosmin isoform X1		0
XP_025119523	NSFL1C	NSFL1 cofactor p47 isoform X1	SPERM HEAD	0	GAMETE INTERACTION, CAPACITATION
XP_006049050	NSFL1C.1	NSFL1 cofactor p47 isoform X3	SPERM HEAD	0	GAMETE INTERACTION, CAPACITATION
XP_006049049	NSFL1C.2	NSFL1 cofactor p47 isoform X2	SPERM HEAD	0	GAMETE INTERACTION, CAPACITATION
XP_006046027	NUDT9.1	ADP-ribose pyrophosphatase, mitochondrial isoform X2		0
XP_025117545	ODF2	outer dense fiber protein 2 isoform X5	FLAGELLA	0	MOTILITY
XP_025117556	ODF2.1	outer dense fiber protein 2 isoform X14	FLAGELLA	0	MOTILITY
XP_025117548	ODF2.10	outer dense fiber protein 2 isoform X8	FLAGELLA	0	MOTILITY
XP_025117554	ODF2.11	outer dense fiber protein 2 isoform X13	FLAGELLA	0	MOTILITY
XP_006065417	ODF2.12	outer dense fiber protein 2 isoform X2	FLAGELLA	0	MOTILITY
XP_025117550	ODF2.13	outer dense fiber protein 2 isoform X10	FLAGELLA	0	MOTILITY
XP_025117549	ODF2.14	outer dense fiber protein 2 isoform X9	FLAGELLA	0	MOTILITY
XP_006065416	ODF2.2	outer dense fiber protein 2 isoform X1	FLAGELLA	0	MOTILITY
XP_025117553	ODF2.3	outer dense fiber protein 2 isoform X12	FLAGELLA	0	MOTILITY
XP_025117539	ODF2.4	outer dense fiber protein 2 isoform X4	FLAGELLA	0	MOTILITY
XP_025117546	ODF2.5	outer dense fiber protein 2 isoform X6	FLAGELLA	0	MOTILITY
XP_006065418	ODF2.6	outer dense fiber protein 2 isoform X3	FLAGELLA	0	MOTILITY
XP_025117557	ODF2.7	outer dense fiber protein 2 isoform X11	FLAGELLA	0	MOTILITY
XP_025117547	ODF2.8	outer dense fiber protein 2 isoform X7	FLAGELLA	0	MOTILITY
XP_006065421	ODF2.9	outer dense fiber protein 2 isoform X15	FLAGELLA	0	MOTILITY
XP_025142930	ODF3	outer dense fiber protein 3 isoform X1	FLAGELLA	0	MOTILITY + SPERM PROTECTION
XP_025142932	ODF3	outer dense fiber protein 3 isoform X3	FLAGELLA	0	MOTILITY + SPERM PROTECTION
XP_025142931	ODF3.1	outer dense fiber protein 3 isoform X2	FLAGELLA	0	MOTILITY + SPERM PROTECTION
XP_025138369	ODF3B	outer dense fiber protein 3B isoform X2	FLAGELLA	0	MOTILITY + SPERM PROTECTION
XP_025138371	ODF3B.1	outer dense fiber protein 3B isoform X4	FLAGELLA	0	MOTILITY + SPERM PROTECTION
XP_025138367	ODF3B.2	outer dense fiber protein 3B isoform X1	FLAGELLA	0	MOTILITY + SPERM PROTECTION
XP_025138372	ODF3B.3	outer dense fiber protein 3B isoform X5	FLAGELLA	0	MOTILITY + SPERM PROTECTION
NP_001277864	ORM1	alpha-1-acid glycoprotein 1		0
XP_006069856	OSBP2	LOW QUALITY PROTEIN: oxysterol-binding protein 2		0
XP_025121520	OVCH2	ovochymase-2		0
XP_006075113	PA2G4	proliferation-associated protein 2G4		0
XP_006076733	PARK7	protein/nucleic acid deglycase DJ-1	SPERM HEAD	0	GAMETE INTERACTION
XP_006046140	PARP1	poly [ADP-ribose] polymerase 1		0
XP_006079689	PCBP1	poly(rC)-binding protein 1		0
XP_025140076	PCBP2	poly(rC)-binding protein 2 isoform X28	NUCLEUS	0	SPERM PROTECTION, EMBRYONIC DEVELOPMENT
XP_025140072	PCBP2.1	poly(rC)-binding protein 2 isoform X24	NUCLEUS	0	SPERM PROTECTION, EMBRYONIC DEVELOPMENT
XP_025140058	PCBP2.10	poly(rC)-binding protein 2 isoform X10	NUCLEUS	0	SPERM PROTECTION, EMBRYONIC DEVELOPMENT
XP_025140049	PCBP2.11	poly(rC)-binding protein 2 isoform X3	NUCLEUS	0	SPERM PROTECTION, EMBRYONIC DEVELOPMENT
XP_025140064	PCBP2.12	poly(rC)-binding protein 2 isoform X16	NUCLEUS	0	SPERM PROTECTION, EMBRYONIC DEVELOPMENT
XP_025140059	PCBP2.13	poly(rC)-binding protein 2 isoform X11	NUCLEUS	0	SPERM PROTECTION, EMBRYONIC DEVELOPMENT
XP_025140047	PCBP2.14	poly(rC)-binding protein 2 isoform X1	NUCLEUS	0	SPERM PROTECTION, EMBRYONIC DEVELOPMENT
XP_025140054	PCBP2.15	poly(rC)-binding protein 2 isoform X6	NUCLEUS	0	SPERM PROTECTION, EMBRYONIC DEVELOPMENT
XP_025140061	PCBP2.16	poly(rC)-binding protein 2 isoform X13	NUCLEUS	0	SPERM PROTECTION, EMBRYONIC DEVELOPMENT
XP_025140071	PCBP2.2	poly(rC)-binding protein 2 isoform X23	NUCLEUS	0	SPERM PROTECTION, EMBRYONIC DEVELOPMENT
XP_025140075	PCBP2.3	poly(rC)-binding protein 2 isoform X27	NUCLEUS	0	SPERM PROTECTION, EMBRYONIC DEVELOPMENT
XP_025140068	PCBP2.4	poly(rC)-binding protein 2 isoform X20	NUCLEUS	0	SPERM PROTECTION, EMBRYONIC DEVELOPMENT
XP_025140070	PCBP2.5	poly(rC)-binding protein 2 isoform X22	NUCLEUS	0	SPERM PROTECTION, EMBRYONIC DEVELOPMENT
XP_025140074	PCBP2.6	poly(rC)-binding protein 2 isoform X26	NUCLEUS	0	SPERM PROTECTION, EMBRYONIC DEVELOPMENT
XP_025140073	PCBP2.7	poly(rC)-binding protein 2 isoform X25	NUCLEUS	0	SPERM PROTECTION, EMBRYONIC DEVELOPMENT
XP_025140069	PCBP2.8	poly(rC)-binding protein 2 isoform X21	NUCLEUS	0	SPERM PROTECTION, EMBRYONIC DEVELOPMENT
XP_025140067	PCBP2.9	poly(rC)-binding protein 2 isoform X19	NUCLEUS	0	SPERM PROTECTION, EMBRYONIC DEVELOPMENT
XP_006079680	PCYOX1	prenylcysteine oxidase 1		0
XP_006056444	PDCD5	programmed cell death protein 5		0
XP_006076125	PDCD6IP	programmed cell death 6-interacting protein isoform X2		0
XP_006076126	PDCD6IP.1	programmed cell death 6-interacting protein isoform X1		0
XP_006058391	PDCL2	phosducin-like protein 2 isoform X1		0
XP_025145826	PDCL2.1	phosducin-like protein 2 isoform X2		0
XP_025130327	PDGFA	platelet-derived growth factor subunit A isoform X1	TESTIS	0	SPERMATOGENESIS
XP_006041419	PDHB	pyruvate dehydrogenase E1 component subunit beta, mitochondrial		0
XP_006074296	PEBP1	phosphatidylethanolamine-binding protein 1	SPERM PM	0	SPERM MATURATION
XP_025148380	PFDN1	prefoldin subunit 1 isoform X3	TESTIS	0	SPERMATOGENESIS, MALE FERTILITY
XP_025148379	PFDN1.1	prefoldin subunit 1 isoform X2	TESTIS	0	SPERMATOGENESIS, MALE FERTILITY
XP_006048554	PFDN2	prefoldin subunit 2	TESTIS	0	SPERMATOGENESIS, MALE FERTILITY
XP_006046703	PFDN5	prefoldin subunit 5	TESTIS	0	SPERMATOGENESIS, MALE FERTILITY
XP_006050378	PFDN6	prefoldin subunit 6	TESTIS	0	SPERMATOGENESIS, MALE FERTILITY
XP_025119864	PFKP	ATP-dependent 6-phosphofructokinase, platelet type isoform X1		0
XP_025119865	PFKP.1	ATP-dependent 6-phosphofructokinase, platelet type isoform X2		0
XP_006061228	PGAM1	phosphoglycerate mutase 1		0
XP_006074829	PGAM2	phosphoglycerate mutase 2		0
XP_006051590	PGK1	phosphoglycerate kinase 1		0
XP_006050775	PGK2	phosphoglycerate kinase 2	EPIDIDYMIS, SPP	0	MALE FERILITY
XP_025130778	PGP	glycerol-3-phosphate phosphatase		0
XP_006080250	PGRMC1	membrane-associated progesterone receptor component 1		0
XP_006049413	PHGDH	D-3-phosphoglycerate dehydrogenase		0
XP_025136681	PITPNA	phosphatidylinositol transfer protein alpha isoform isoform X1		0
XP_025136682	PITPNA.1	phosphatidylinositol transfer protein alpha isoform isoform X2		0
XP_025150569	PKIB	cAMP-dependent protein kinase inhibitor beta isoform X2		0
XP_025150568	PKIB.1	cAMP-dependent protein kinase inhibitor beta isoform X1		0
XP_006056975	PKM	pyruvate kinase PKM isoform X3		0
XP_025151997	PKM.1	pyruvate kinase PKM isoform X2		0
XP_025151998	PKM.1	pyruvate kinase PKM isoform X4		0
XP_025151996	PKM.2	pyruvate kinase PKM isoform X1		0
XP_006076201	PLA2G7.1	platelet-activating factor acetylhydrolase isoform X2	SPP	0	MOTILITY, CAPACITATION
XP_006044042	PLEKHS1	pleckstrin homology domain-containing family S member 1 isoform X3	EPIDIDYMIS	0	MATURATION
XP_006044040	PLEKHS1.1	pleckstrin homology domain-containing family S member 1 isoform X1	EPIDIDYMIS	0	MATURATION
XP_025129708	PLEKHS1.2	pleckstrin homology domain-containing family S member 1 isoform X4	EPIDIDYMIS	0	MATURATION
XP_006044041	PLEKHS1.3	pleckstrin homology domain-containing family S member 1 isoform X2	EPIDIDYMIS	0	MATURATION
XP_006067188	PLIN3	perilipin-3 isoform X1	TESTIS, EPIDIDYMIS	0	SPERMATOGENESIS, SPERM MATURATION, MALE FERTILITY
XP_006067191	PLIN3.1	perilipin-3 isoform X2	TESTIS, EPIDIDYMIS	0	SPERMATOGENESIS, SPERM MATURATION, MALE FERTILITY
XP_025149037	PLIN3.2	perilipin-3 isoform X4	TESTIS, EPIDIDYMIS	0	SPERMATOGENESIS, SPERM MATURATION, MALE FERTILITY
XP_025149038	PLIN3.3	perilipin-3 isoform X5	TESTIS, EPIDIDYMIS	0	SPERMATOGENESIS, SPERM MATURATION, MALE FERTILITY
XP_025149036	PLIN3.4	perilipin-3 isoform X3	TESTIS, EPIDIDYMIS	0	SPERMATOGENESIS, SPERM MATURATION, MALE FERTILITY
XP_006054314	PLS3	plastin-3		0
XP_006051354	PPIA	peptidyl-prolyl cis-trans isomerase A isoform X1	EPIDIDYMIS, SPP	0	SPERM PROTECTION, SPERM MATURATION
XP_025147127	PPIA.1	peptidyl-prolyl cis-trans isomerase A isoform X2	EPIDIDYMIS, SPP	0	SPERM PROTECTION, SPERM MATURATION
XP_006073367	PPME1	protein phosphatase methylesterase 1 isoform X1	EPIDIDYMIS	0	MOTILITY
XP_006073366	PPME1.1	protein phosphatase methylesterase 1 isoform X4	EPIDIDYMIS	0	MOTILITY
XP_025122221	PPME1.2	protein phosphatase methylesterase 1 isoform X3	EPIDIDYMIS	0	MOTILITY
XP_006073368	PPME1.3	protein phosphatase methylesterase 1 isoform X2	EPIDIDYMIS	0	MOTILITY
XP_006061689	PPP1R11	E3 ubiquitin-protein ligase PPP1R11 isoform X1		0
XP_006061690	PPP1R11.1	E3 ubiquitin-protein ligase PPP1R11 isoform X2		0
XP_006077194	PPP1R7	protein phosphatase 1 regulatory subunit 7 isoform X1	TESTIS, GERM CELLS, FLAGELLUM	0	MOTILITY, SPERM MATURATION
XP_025145101	PPP1R7.1	protein phosphatase 1 regulatory subunit 7 isoform X2	TESTIS, GERM CELLS, FLAGELLUM	0	MOTILITY, SPERM MATURATION
XP_006065122	PPP2R1A	serine/threonine-protein phosphatase 2A 65 kDa regulatory subunit A alpha isoform		0
XP_025129138	PPP4R1	serine/threonine-protein phosphatase 4 regulatory subunit 1 isoform X4	GERM CELLS	0	SPERMATOGENESIS
XP_025129135	PPP4R1.1	serine/threonine-protein phosphatase 4 regulatory subunit 1 isoform X1	GERM CELLS	0	SPERMATOGENESIS
XP_025129136	PPP4R1.2	serine/threonine-protein phosphatase 4 regulatory subunit 1 isoform X2	GERM CELLS	0	SPERMATOGENESIS
XP_025129139	PPP4R1.3	serine/threonine-protein phosphatase 4 regulatory subunit 1 isoform X5	GERM CELLS	0	SPERMATOGENESIS
XP_025129137	PPP4R1.4	serine/threonine-protein phosphatase 4 regulatory subunit 1 isoform X3	GERM CELLS	0	SPERMATOGENESIS
NP_001277875	PRDX1	peroxiredoxin-1	EPIDIDYMOSOMES	0	SPERM PROTECTION
XP_025142397	PRDX5	peroxiredoxin-5, mitochondrial isoform X2		0
XP_006050953	PRDX5.1	peroxiredoxin-5, mitochondrial isoform X1		0
XP_025149457	PRKACA	cAMP-dependent protein kinase catalytic subunit alpha isoform X1	FLAGELLA	0	CAPACITATION, MALE FERTILITY
XP_006066594	PRKACA.1	cAMP-dependent protein kinase catalytic subunit alpha isoform X2	FLAGELLA	0	CAPACITATION, MALE FERTILITY
XP_025144170	PRKACB	LOW QUALITY PROTEIN: cAMP-dependent protein kinase catalytic subunit beta		0
XP_006061971	PRKAR1A	cAMP-dependent protein kinase type I-alpha regulatory subunit	FLAGELLA	0	CAPACITATION
XP_006065206	PRKAR2A	cAMP-dependent protein kinase type II-alpha regulatory subunit	FLAGELLA	0	CAPACITATION
XP_006068512	PRKAR2B	cAMP-dependent protein kinase type II-beta regulatory subunit	FLAGELLA	0	CAPACITATION
XP_006047820	PRNP	major prion protein-like		0
XP_006042243	PROCA1	protein PROCA1 isoform X2	TESTIS	0	MOTILITY, MALE FERTILITY
XP_006042244	PROCA1.1	protein PROCA1 isoform X3	TESTIS	0	MOTILITY, MALE FERTILITY
XP_006042242	PROCA1.2	protein PROCA1 isoform X1	TESTIS	0	MOTILITY, MALE FERTILITY
XP_025116391	PROM2	prominin-2 isoform X3	EPIDIDYMOSOMES, SPERM PM, SPP	0	CAPACITATION, SPERMATOGENESIS
XP_025116390	PROM2.2	prominin-2 isoform X2	EPIDIDYMOSOMES, SPERM PM, SPP	0	CAPACITATION, SPERMATOGENESIS
XP_006053505	PRPF31	U4/U6 small nuclear ribonucleoprotein Prp31		0
XP_006075881	PRPH	peripherin isoform X1		0
XP_006075882	PRPH.1	peripherin isoform X2		0
XP_006046752	PSIP1	PC4 and SFRS1-interacting protein isoform X1		0
XP_006054502	PSMA1	proteasome subunit alpha type-1 isoform X2	EPIDIDYMOSOMES, SPP	0	SPERM PROTECTION, MALE FERTILITY, FERTILIZATION
XP_025122477	PSMA1.1	proteasome subunit alpha type-1 isoform X1	EPIDIDYMOSOMES, SPP	0	SPERM PROTECTION, MALE FERTILITY, FERTILIZATION
XP_006046381	PSMA2	proteasome subunit alpha type-2	EPIDIDYMOSOMES, SPP	0	SPERM PROTECTION, MALE FERTILITY, FERTILIZATION
XP_006044451	PSMA4	proteasome subunit alpha type-4	EPIDIDYMOSOMES, SPP	0	SPERM PROTECTION, MALE FERTILITY, FERTILIZATION
XP_006052236	PSMA5	proteasome subunit alpha type-5	EPIDIDYMOSOMES, SPP	0	SPERM PROTECTION, MALE FERTILITY, FERTILIZATION
XP_006043909	PSMA6	proteasome subunit alpha type-6 isoform X1	EPIDIDYMOSOMES, SPP	0	SPERM PROTECTION, MALE FERTILITY, FERTILIZATION
XP_025127318	PSMA6.1	proteasome subunit alpha type-6 isoform X2	EPIDIDYMOSOMES, SPP	0	SPERM PROTECTION, MALE FERTILITY, FERTILIZATION
XP_025129144	PSMA8	proteasome subunit alpha-type 8 isoform X1	EPIDIDYMOSOMES, SPP	0	SPERM PROTECTION, MALE FERTILITY, FERTILIZATION
XP_006052347	PSMA8.1	proteasome subunit alpha-type 8 isoform X2	EPIDIDYMOSOMES, SPP	0	SPERM PROTECTION, MALE FERTILITY, FERTILIZATION
XP_006060155	PSMB6	proteasome subunit beta type-6	ACROSOME	0	ZP PENETRATION
XP_006049910	PSMC2	26S proteasome regulatory subunit 7	Anterior head plasma membrane	0	CAPACITATION
XP_006057428	PSMC3	26S proteasome regulatory subunit 6A isoform X1	Anterior head plasma membrane	0	CAPACITATION
XP_025121863	PSMC3.1	26S proteasome regulatory subunit 6A isoform X2	Anterior head plasma membrane	0	CAPACITATION
XP_006054051	PSMC6	26S proteasome regulatory subunit 10B	Anterior head plasma membrane	0	CAPACITATION
XP_006056777	PSMD2	26S proteasome non-ATPase regulatory subunit 2	ACROSOME	0	ZP PENETRATION
XP_006055155	PSMD4	26S proteasome non-ATPase regulatory subunit 4 isoform X2	ACROSOME	0	ZP PENETRATION
XP_006055154	PSMD4.1	26S proteasome non-ATPase regulatory subunit 4 isoform X1	ACROSOME	0	ZP PENETRATION
XP_006047665	PSMD7	26S proteasome non-ATPase regulatory subunit 7	ACROSOME	0	ZP PENETRATION
XP_006045360	QRICH2	LOW QUALITY PROTEIN: glutamine-rich protein 2		0
XP_006048651	QSOX1	sulfhydryl oxidase 1 isoform X1	SPP	0	MALE FERTILITY
XP_006048652	QSOX1.1	sulfhydryl oxidase 1 isoform X2	SPP	0	MALE FERTILITY
XP_006050272	RAB11A	ras-related protein Rab-11A	EPIDIDYMOSOMES	0	SPERM MATURATION
XP_006046781	RAB11B	ras-related protein Rab-11B isoform X1	EPIDIDYMOSOMES	0	SPERM MATURATION
XP_025149162	RAB11B.1	ras-related protein Rab-11B isoform X2	EPIDIDYMOSOMES	0	SPERM MATURATION
XP_006053587	RAB1A	ras-related protein Rab-1A isoform X1	EPIDIDYMOSOMES	0	SPERM MATURATION
XP_006053588	RAB1A.1	ras-related protein Rab-1A isoform X2		0
XP_025117032	RAB1A.2	ras-related protein Rab-1A isoform X3		0
XP_006056483	RAB1B	ras-related protein Rab-1B		0
XP_006041613	RAD23A	UV excision repair protein RAD23 homolog A isoform X1		0
XP_006041614	RAD23A.1	UV excision repair protein RAD23 homolog A isoform X2		0
XP_006065585	RANBP1	ran-specific GTPase-activating protein isoform X1		0
XP_025122906	RANBP1.1	ran-specific GTPase-activating protein isoform X2		0
XP_025148531	REEP6	receptor expression-enhancing protein 6 isoform X1		0
XP_006064624	RELCH	lisH domain and HEAT repeat-containing protein KIAA1468 homolog isoform X4		0
XP_006064622	RELCH.1	lisH domain and HEAT repeat-containing protein KIAA1468 homolog isoform X2		0
XP_006064626	RELCH.2	lisH domain and HEAT repeat-containing protein KIAA1468 homolog isoform X6		0
XP_006064621	RELCH.3	lisH domain and HEAT repeat-containing protein KIAA1468 homolog isoform X1		0
XP_006064625	RELCH.4	lisH domain and HEAT repeat-containing protein KIAA1468 homolog isoform X5		0
XP_006064627	RELCH.5	lisH domain and HEAT repeat-containing protein KIAA1468 homolog isoform X8		0
XP_025128982	RELCH.6	lisH domain and HEAT repeat-containing protein KIAA1468 homolog isoform X7		0
XP_006064623	RELCH.7	lisH domain and HEAT repeat-containing protein KIAA1468 homolog isoform X3		0
XP_006053316	RHOA	transforming protein RhoA		0
XP_006071570	RHOC	rho-related GTP-binding protein RhoC		0
XP_006048449	RNASE12	probable inactive ribonuclease-like protein 12 isoform X2		0
XP_006048448	RNASE12.1	probable inactive ribonuclease-like protein 12 isoform X1		0
XP_025141001	ROPN1	ropporin-1A		0
XP_025139829	RPAP3	LOW QUALITY PROTEIN: RNA polymerase II-associated protein 3		0
XP_006043695	RPL10	60S ribosomal protein L10 isoform X1		0
XP_025133109	RPL10.1	60S ribosomal protein L10 isoform X2		0
XP_006066222	RPL10L	60S ribosomal protein L10-like		0
XP_006074559	RPL12	60S ribosomal protein L12		0
XP_006048940	RPL22	60S ribosomal protein L22		0
XP_006070127	RPL8	60S ribosomal protein L8		0
XP_006073535	RPS17	40S ribosomal protein S17		0
XP_006050373	RPS18	40S ribosomal protein S18 isoform X1		0
XP_006072360	RPS21	40S ribosomal protein S21		0
XP_006059412	RPS23	40S ribosomal protein S23		0
XP_025116830	RPS27A	ubiquitin-40S ribosomal protein S27a isoform X2		0
XP_025116829	RPS27A.1	ubiquitin-40S ribosomal protein S27a isoform X1		0
XP_006074139	RPS3	40S ribosomal protein S3		0
XP_006061062	RPS3A	40S ribosomal protein S3a		0
XP_006067329	RPS5	40S ribosomal protein S5		0
XP_025150111	RSPH3	LOW QUALITY PROTEIN: radial spoke head protein 3 homolog		0
XP_006067549	RSPH6A	LOW QUALITY PROTEIN: radial spoke head protein 6 homolog A		0
XP_025134802	SAXO1	stabilizer of axonemal microtubules 1		0
XP_006053542	SDHA	succinate dehydrogenase [ubiquinone] flavoprotein subunit, mitochondrial		0
XP_025123146	SF3A1	LOW QUALITY PROTEIN: splicing factor 3A subunit 1		0
XP_006077612	SF3A3	splicing factor 3A subunit 3		0
XP_006055529	SFN	14-3-3 protein sigma		0
XP_025144904	SFPQ	splicing factor, proline- and glutamine-rich isoform X1		0
XP_025144906	SFPQ.1	splicing factor, proline- and glutamine-rich isoform X2		0
XP_006047901	SGTA	small glutamine-rich tetratricopeptide repeat-containing protein alpha isoform X2		0
XP_006047903	SGTA.1	small glutamine-rich tetratricopeptide repeat-containing protein alpha isoform X1		0
XP_006047904	SGTA.2	small glutamine-rich tetratricopeptide repeat-containing protein alpha isoform X3		0
XP_006055508	SH3BGRL3	SH3 domain-binding glutamic acid-rich-like protein 3		0
XP_006080551	SH3GLB1	endophilin-B1 isoform X4		0
XP_006080550	SH3GLB1.1	endophilin-B1 isoform X3		0
XP_006080549	SH3GLB1.2	endophilin-B1 isoform X2		0
XP_006080548	SH3GLB1.3	endophilin-B1 isoform X1		0
XP_025142112	SIAE	sialate O-acetylesterase isoform X3	TESTIS, GERM CELLS	0	SPERMATOGENESIS
XP_025142113	SIAE.1	sialate O-acetylesterase isoform X4	TESTIS, GERM CELLS	0	SPERMATOGENESIS
XP_025142111	SIAE.2	sialate O-acetylesterase isoform X1	TESTIS, GERM CELLS	0	SPERMATOGENESIS
XP_025119719	SIRPA	tyrosine-protein phosphatase non-receptor type substrate 1 isoform X4	MID-PIECE	0	MOTILITY
XP_006042105	SIRPA.1	tyrosine-protein phosphatase non-receptor type substrate 1 isoform X1	MID-PIECE	0	MOTILITY
XP_025119717	SIRPA.3	tyrosine-protein phosphatase non-receptor type substrate 1 isoform X2	MID-PIECE	0	MOTILITY
XP_025119721	SIRPA.4	tyrosine-protein phosphatase non-receptor type substrate 1 isoform X6	MID-PIECE	0	MOTILITY
XP_025119718	SIRPA.5	tyrosine-protein phosphatase non-receptor type substrate 1 isoform X3	MID-PIECE	0	MOTILITY
XP_006069822	SLC2A3	LOW QUALITY PROTEIN: solute carrier family 2, facilitated glucose transporter member 3		0
XP_025135470	SLC38A10	putative sodium-coupled neutral amino acid transporter 10 isoform X4	SPERM PM	0	SPERM SURVIVAL
	SLC38A10.1	putative sodium-coupled neutral amino acid transporter 10 isoform X1	SPERM PM	0	SPERM SURVIVAL
XP_025135473	SLC38A10.2	putative sodium-coupled neutral amino acid transporter 10 isoform X7	SPERM PM	0	SPERM SURVIVAL
XP_025135472	SLC38A10.3	putative sodium-coupled neutral amino acid transporter 10 isoform X6	SPERM PM	0	SPERM SURVIVAL
XP_025135471	SLC38A10.4	putative sodium-coupled neutral amino acid transporter 10 isoform X5	SPERM PM	0	SPERM SURVIVAL
XP_025135468	SLC38A10.5	putative sodium-coupled neutral amino acid transporter 10 isoform X2	SPERM PM	0	SPERM SURVIVAL
XP_025135469	SLC38A10.6	putative sodium-coupled neutral amino acid transporter 10 isoform X3	SPERM PM	0	SPERM SURVIVAL
XP_006045267	SLC9A3R1	Na(+)/H(+) exchange regulatory cofactor NHE-RF1		0
XP_025147841	SND1	staphylococcal nuclease domain-containing protein 1		0
XP_025116402	SNRNP200	U5 small nuclear ribonucleoprotein 200 kDa helicase		0
NP_001277902	SOD1	superoxide dismutase [Cu-Zn]	EPIDIDYMIS	0	SPERM MATURATION, SPERM SURVIVAL
XP_025151301	SORD	sorbitol dehydrogenase isoform X2	EPISISYMOSOMES	0	GAMETE INTERACTION
XP_006076365	SORD.1	sorbitol dehydrogenase isoform X1	EPISISYMOSOMES	0	GAMETE INTERACTION
XP_006057707	SPA17	sperm surface protein Sp17	SPERM PM	0	ZP PENETRATION
XP_025117733	SPACA9	sperm acrosome-associated protein 9 isoform X2	TESTIS, ACROSOME	0	ACROSOME REACTION
XP_006062223	SPACA9.1	sperm acrosome-associated protein 9 isoform X1	TESTIS, ACROSOME	0	ACROSOME REACTION
XP_006057549	SPATA18	mitochondria-eating protein isoform X1	SPP, MITOCHONDRIA	0	SPERMATOGENESIS, MALE FERTILITY
XP_025145834	SPATA18.1	mitochondria-eating protein isoform X2	SPP, MITOCHONDRIA	0	SPERMATOGENESIS, MALE FERTILITY
XP_006050188	SPATA3	spermatogenesis-associated protein 3 isoform X2	TESTIS	0	MALE FERTILITY, SPERMATOGENESIS
XP_025134229	SPATA3.1	spermatogenesis-associated protein 3 isoform X4	TESTIS	0	MALE FERTILITY, SPERMATOGENESIS
XP_025134228	SPATA3.2	spermatogenesis-associated protein 3 isoform X3	TESTIS	0	MALE FERTILITY, SPERMATOGENESIS
XP_025134230	SPATA3.3	spermatogenesis-associated protein 3 isoform X5	TESTIS	0	MALE FERTILITY, SPERMATOGENESIS
XP_025135723	SPATA32	spermatogenesis-associated protein 32 isoform X1	TESTIS	0	MALE FERTILITY, SPERMATOGENESIS
XP_025135724	SPATA32.1	spermatogenesis-associated protein 32 isoform X2	TESTIS	0	MALE FERTILITY, SPERMATOGENESIS
XP_006072599	SPERT	spermatid-associated protein isoform X1	GERM CELLS	0	SPERMATOGENESIS
XP_025118795	SPERT.1	spermatid-associated protein isoform X3	GERM CELLS	0	SPERMATOGENESIS
XP_025118794	SPERT.2	spermatid-associated protein isoform X2	GERM CELLS	0	SPERMATOGENESIS
XP_025147802	SRPK2	SRSF protein kinase 2 isoform X5	TESTIS	0	SPERMATOGENESIS
XP_025147798	SRPK2.1	SRSF protein kinase 2 isoform X1	TESTIS	0	SPERMATOGENESIS
XP_025147810	SRPK2.10	SRSF protein kinase 2 isoform X13	TESTIS	0	SPERMATOGENESIS
XP_025147805	SRPK2.11	SRSF protein kinase 2 isoform X8	TESTIS	0	SPERMATOGENESIS
XP_025147803	SRPK2.12	SRSF protein kinase 2 isoform X6	TESTIS	0	SPERMATOGENESIS
XP_025147806	SRPK2.2	SRSF protein kinase 2 isoform X9	TESTIS	0	SPERMATOGENESIS
XP_025147808	SRPK2.3	SRSF protein kinase 2 isoform X11	TESTIS	0	SPERMATOGENESIS
XP_025147807	SRPK2.4	SRSF protein kinase 2 isoform X10	TESTIS	0	SPERMATOGENESIS
XP_025147801	SRPK2.5	SRSF protein kinase 2 isoform X4	TESTIS	0	SPERMATOGENESIS
XP_025147800	SRPK2.6	SRSF protein kinase 2 isoform X3	TESTIS	0	SPERMATOGENESIS
XP_025147809	SRPK2.7	SRSF protein kinase 2 isoform X12	TESTIS	0	SPERMATOGENESIS
XP_025147804	SRPK2.8	SRSF protein kinase 2 isoform X7	TESTIS	0	SPERMATOGENESIS
XP_025147799	SRPK2.9	SRSF protein kinase 2 isoform X2	TESTIS	0	SPERMATOGENESIS
XP_006079814	SRR	serine racemase isoform X1		0
XP_025136661	SRR.1	serine racemase isoform X3		0
XP_025136656	SRR.2	serine racemase isoform X2		0
XP_025136662	SRR.3	serine racemase isoform X4		0
XP_006076299	SRSF1	serine/arginine-rich splicing factor 1		0
XP_025135362	SRSF2	serine/arginine-rich splicing factor 2		0
XP_006050467	SRSF3	serine/arginine-rich splicing factor 3		0
XP_006071250	SRSF7	serine/arginine-rich splicing factor 7 isoform X2		0
XP_006071252	SRSF7.1	serine/arginine-rich splicing factor 7 isoform X3		0
XP_006071251	SRSF7.2	serine/arginine-rich splicing factor 7 isoform X1		0
XP_006060063	SSB	lupus La protein		0
XP_006042203	SSH2	protein phosphatase Slingshot homolog 2 isoform X3	CYTOSKELETON	0	CAPACITATION
XP_025136741	SSH2.1	protein phosphatase Slingshot homolog 2 isoform X1	CYTOSKELETON	0	CAPACITATION
XP_025136743	SSH2.2	protein phosphatase Slingshot homolog 2 isoform X4	CYTOSKELETON	0	CAPACITATION
XP_025136742	SSH2.3	protein phosphatase Slingshot homolog 2 isoform X2	CYTOSKELETON	0	CAPACITATION
XP_025136745	SSH2.5	protein phosphatase Slingshot homolog 2 isoform X6	CYTOSKELETON	0	CAPACITATION
XP_025117954	SSNA1	Sjoegren syndrome nuclear autoantigen 1 isoform X2		0
XP_025117953	SSNA1.1	Sjoegren syndrome nuclear autoantigen 1 isoform X1		0
XP_006056528	SSSCA1	Sjoegren syndrome/scleroderma autoantigen 1		0
XP_006071332	ST13	hsc70-interacting protein isoform X2		0
XP_025138590	ST13.1	hsc70-interacting protein isoform X1		0
XP_025120126	ST8SIA6.1	alpha-2,8-sialyltransferase 8F isoform X3		0
XP_025120125	ST8SIA6.2	alpha-2,8-sialyltransferase 8F isoform X2		0
XP_025119100	STAU1	double-stranded RNA-binding protein Staufen homolog 1 isoform X3	TESTIS, GERM CELLS	0	MALE FERTILITY, SPERMATOGENESIS
XP_025119098	STAU1.1	double-stranded RNA-binding protein Staufen homolog 1 isoform X1	TESTIS, GERM CELLS	0	MALE FERTILITY, SPERMATOGENESIS
XP_025119101	STAU1.2	double-stranded RNA-binding protein Staufen homolog 1 isoform X4	TESTIS, GERM CELLS	0	MALE FERTILITY, SPERMATOGENESIS
XP_025119105	STAU1.3	double-stranded RNA-binding protein Staufen homolog 1 isoform X6	TESTIS, GERM CELLS	0	MALE FERTILITY, SPERMATOGENESIS
XP_025119102	STAU1.4	double-stranded RNA-binding protein Staufen homolog 1 isoform X5	TESTIS, GERM CELLS	0	MALE FERTILITY, SPERMATOGENESIS
XP_025119106	STAU1.5	double-stranded RNA-binding protein Staufen homolog 1 isoform X7	TESTIS, GERM CELLS	0	MALE FERTILITY, SPERMATOGENESIS
XP_025119099	STAU1.6	double-stranded RNA-binding protein Staufen homolog 1 isoform X2	TESTIS, GERM CELLS	0	MALE FERTILITY, SPERMATOGENESIS
XP_025121019	STAU2	double-stranded RNA-binding protein Staufen homolog 2 isoform X3	TESTIS, GERM CELLS	0	MALE FERTILITY, SPERMATOGENESIS
XP_025121025	STAU2.2	double-stranded RNA-binding protein Staufen homolog 2 isoform X6	TESTIS, GERM CELLS	0	MALE FERTILITY, SPERMATOGENESIS
XP_025121022	STAU2.3	double-stranded RNA-binding protein Staufen homolog 2 isoform X4	TESTIS, GERM CELLS	0	MALE FERTILITY, SPERMATOGENESIS
XP_025121018	STAU2.4	double-stranded RNA-binding protein Staufen homolog 2 isoform X2	TESTIS, GERM CELLS	0	MALE FERTILITY, SPERMATOGENESIS
XP_025121029	STAU2.5	double-stranded RNA-binding protein Staufen homolog 2 isoform X8	TESTIS, GERM CELLS	0	MALE FERTILITY, SPERMATOGENESIS
XP_025121027	STAU2.7	double-stranded RNA-binding protein Staufen homolog 2 isoform X7	TESTIS, GERM CELLS	0	MALE FERTILITY, SPERMATOGENESIS
XP_025121030	STAU2.8	double-stranded RNA-binding protein Staufen homolog 2 isoform X9	TESTIS, GERM CELLS	0	MALE FERTILITY, SPERMATOGENESIS
XP_006050920	STIP1	stress-induced-phosphoprotein 1		0
XP_006046823	STXBP2	syntaxin-binding protein 2		0
XP_006070120	SUCLG2	succinate--CoA ligase [GDP-forming] subunit beta, mitochondrial isoform X1		0
XP_025128866	SUCLG2.1	succinate--CoA ligase [GDP-forming] subunit beta, mitochondrial isoform X2		0
XP_006062157	SUPT16H	FACT complex subunit SPT16		0
XP_025150357	SYNCRIP	heterogeneous nuclear ribonucleoprotein Q isoform X1		0
XP_006057637	SYNCRIP.1	heterogeneous nuclear ribonucleoprotein Q isoform X3		0
XP_025150358	SYNCRIP.2	heterogeneous nuclear ribonucleoprotein Q isoform X2		0
XP_006057638	SYNCRIP.3	heterogeneous nuclear ribonucleoprotein Q isoform X4		0
XP_025150359	SYNCRIP.4	heterogeneous nuclear ribonucleoprotein Q isoform X5		0
XP_025125216	SYNGR4	synaptogyrin-4		0
XP_006061090	TAGLN2	transgelin-2		0
XP_006051316	TCP1	T-complex protein 1 subunit alpha		0
XP_006069366	TCTE1	dynein regulatory complex subunit 5 isoform X2		0
XP_006069365	TCTE1.1	dynein regulatory complex subunit 5 isoform X1		0
XP_025139473	TESPA1	protein TESPA1 isoform X6		0
XP_025124999	TEX101.1	testis-expressed protein 101 isoform X1		0
XP_025148610	THEG	testicular haploid expressed gene protein isoform X1	GERM CELLS	0	SPERMATOGENESIS
XP_025148611	THEG.1	testicular haploid expressed gene protein isoform X2	GERM CELLS	0	SPERMATOGENESIS
XP_025145795	THEGL	testicular haploid expressed gene protein-like	GERM CELLS	0	SPERMATOGENESIS
XP_006076628	TKFC.1	triokinase/FMN cyclase isoform X1		0
XP_006079898	TMPRSS11A	transmembrane protease serine 11A isoform X2	PROSTASOMES, SPP, ACROSOME	0	MOTILITY, MALE FERTILITY
XP_006079897	TMPRSS11A.1	transmembrane protease serine 11A isoform X1	PROSTASOMES, SPP, ACROSOME	0	MOTILITY, MALE FERTILITY
XP_006044778	TMPRSS13	transmembrane protease serine 13 isoform X2	PROSTASOMES, SPP, ACROSOME	0	MOTILITY, MALE FERTILITY
XP_006044777	TMPRSS13.1	transmembrane protease serine 13 isoform X1	PROSTASOMES, SPP, ACROSOME	0	MOTILITY, MALE FERTILITY
XP_006051414	TNNC2	troponin C, skeletal muscle		0
XP_006067604	TOMM40	mitochondrial import receptor subunit TOM40 homolog isoform X2		0
XP_006067603	TOMM40.1	mitochondrial import receptor subunit TOM40 homolog isoform X1		0
XP_006065910	TPI1	triosephosphate isomerase		0
XP_006042302	TPP2	tripeptidyl-peptidase 2 isoform X1	TESTIS, ACROSOME	0	CAPACITATION
XP_006042303	TPP2.1	tripeptidyl-peptidase 2 isoform X2	TESTIS, ACROSOME	0	CAPACITATION
XP_025118388	TPP2.2	tripeptidyl-peptidase 2 isoform X3	TESTIS, ACROSOME	0	CAPACITATION
XP_006062131	TPPP2	tubulin polymerization-promoting protein family member 2 isoform X2	TESTIS, EPIDIDYMIS, TAIL	0	MOTILITY, MALE FERTILITY, SPERMATOGENESIS
XP_006062132	TPPP2.1	tubulin polymerization-promoting protein family member 2 isoform X3	TESTIS, EPIDIDYMIS, TAIL	0	MOTILITY, MALE FERTILITY, SPERMATOGENESIS
XP_025151807	TPPP2.2	tubulin polymerization-promoting protein family member 2 isoform X4	TESTIS, EPIDIDYMIS, TAIL	0	MOTILITY, MALE FERTILITY, SPERMATOGENESIS
XP_025151806	TPPP2.3	tubulin polymerization-promoting protein family member 2 isoform X1	TESTIS, EPIDIDYMIS, TAIL	0	MOTILITY, MALE FERTILITY, SPERMATOGENESIS
XP_006077991	TSFM	elongation factor Ts, mitochondrial		0
XP_006076059	TSN	translin isoform X1		0
XP_006065613	TSSK1B	testis-specific serine/threonine-protein kinase 1	GERM CELLS, SPERM HEAD	0	SPERMATOGENESIS
XP_006045228	TSTA3	GDP-L-fucose synthase isoform X1		0
XP_025120699	TSTA3.1	GDP-L-fucose synthase isoform X2		0
XP_006048561	TSTD1	thiosulfate:glutathione sulfurtransferase isoform X1		0
XP_006048562	TSTD1.1	thiosulfate:glutathione sulfurtransferase isoform X2		0
XP_025135924	TTC25	tetratricopeptide repeat protein 25 isoform X1		0
XP_006055831	TTC25.1	tetratricopeptide repeat protein 25 isoform X2		0
XP_006059043	TUBA4A	tubulin alpha-4A chain	FLAGELLA	0	MOTILITY
XP_006071457	TUBA8	tubulin alpha-8 chain	FLAGELLA	0	MOTILITY
XP_006052418	TUBB	tubulin beta chain		0
XP_025120717	TUBB2A	tubulin beta-2A chain		0
XP_006045174	TUBB4A	tubulin beta-4A chain	HEAD	0	MALE FERTILITY
XP_006062617	TUBB4B	tubulin beta-4B chain	HEAD	0	MALE FERTILITY
XP_025129011	TUBB6	tubulin beta-6 chain isoform X2	HEAD	0	MALE FERTILITY
XP_006043089	TUBB6.1	tubulin beta-6 chain isoform X1	HEAD	0	MALE FERTILITY
XP_025137765	TUT7	terminal uridylyltransferase 7 isoform X5	GERM CELLS	0	SPERMATOGENESIS
XP_025137767	TUT7.1	terminal uridylyltransferase 7 isoform X7	GERM CELLS	0	SPERMATOGENESIS
XP_006066910	TUT7.2	terminal uridylyltransferase 7 isoform X3	GERM CELLS	0	SPERMATOGENESIS
XP_025137764	TUT7.3	terminal uridylyltransferase 7 isoform X4	GERM CELLS	0	SPERMATOGENESIS
XP_025137766	TUT7.4	terminal uridylyltransferase 7 isoform X6	GERM CELLS	0	SPERMATOGENESIS
XP_025137760	TUT7.5	terminal uridylyltransferase 7 isoform X1	GERM CELLS	0	SPERMATOGENESIS
XP_025137762	TUT7.6	terminal uridylyltransferase 7 isoform X2	GERM CELLS	0	SPERMATOGENESIS
XP_006064101	U2AF2	splicing factor U2AF 65 kDa subunit isoform X1		0
XP_006064102	U2AF2.1	splicing factor U2AF 65 kDa subunit isoform X2		0
XP_006079904	UBA6	ubiquitin-like modifier-activating enzyme 6		0
XP_025134772	UBB	polyubiquitin-B isoform X1		0
XP_006050061	UBC	polyubiquitin-C		0
XP_025126205	UBE2M	NEDD8-conjugating enzyme Ubc12 isoform X2		0
XP_006067357	UBE2M.1	NEDD8-conjugating enzyme Ubc12 isoform X1		0
XP_006042025	UBQLN1	ubiquilin-1 isoform X1	GERM CELLS	0	SPERMATOGENESIS
XP_006042026	UBQLN1.1	ubiquilin-1 isoform X2	GERM CELLS	0	SPERMATOGENESIS
XP_006052070	UBQLN4	ubiquilin-4 isoform X1	GERM CELLS	0	SPERMATOGENESIS
XP_025143471	UBQLN4.1	ubiquilin-4 isoform X2	GERM CELLS	0	SPERMATOGENESIS
XP_025134469	UBXN11	UBX domain-containing protein 11 isoform X3	SPERM HEAD	0	CAPACITATION
XP_025134473	UBXN11.1	UBX domain-containing protein 11 isoform X8	SPERM HEAD	0	CAPACITATION
XP_025134470	UBXN11.2	UBX domain-containing protein 11 isoform X4	SPERM HEAD	0	CAPACITATION
XP_025134472	UBXN11.3	UBX domain-containing protein 11 isoform X7	SPERM HEAD	0	CAPACITATION
XP_006055505	UBXN11.4	UBX domain-containing protein 11 isoform X1	SPERM HEAD	0	CAPACITATION
XP_006055507	UBXN11.5	UBX domain-containing protein 11 isoform X6	SPERM HEAD	0	CAPACITATION
XP_025134468	UBXN11.6	UBX domain-containing protein 11 isoform X2	SPERM HEAD	0	CAPACITATION
XP_025134471	UBXN11.7	UBX domain-containing protein 11 isoform X5	SPERM HEAD	0	CAPACITATION
XP_006068270	UCHL1	ubiquitin carboxyl-terminal hydrolase isozyme L1		0
XP_025118123	UGP2	UTP--glucose-1-phosphate uridylyltransferase isoform X1	SPP, ACROSOME	0	GAMETE INTERACTION
XP_006064851	UGP2.1	UTP--glucose-1-phosphate uridylyltransferase isoform X2	SPP, ACROSOME	0	GAMETE INTERACTION
XP_006064853	UGP2.2	UTP--glucose-1-phosphate uridylyltransferase isoform X3	SPP, ACROSOME	0	GAMETE INTERACTION
XP_025118124	UGP2.3	UTP--glucose-1-phosphate uridylyltransferase isoform X4	SPP, ACROSOME	0	GAMETE INTERACTION
XP_006065854	VAMP1	vesicle-associated membrane protein 1 isoform X2		0	ACROSOME REACTION
XP_025138858	VAMP1.1	vesicle-associated membrane protein 1 isoform X1	SPERM HEAD	0	ACROSOME REACTION
XP_006062958	VAMP2	vesicle-associated membrane protein 2	EPIDIDYMOSOMES	0	SPERM MATURATION
XP_025143019	VAMP3	vesicle-associated membrane protein 3	EPIDIDYMOSOMES	0	SPERM MATURATION
XP_006055761	VAT1	synaptic vesicle membrane protein VAT-1 homolog		0
XP_006052700	VCL	vinculin isoform X2	ACROSOME	0	CAPACITATION, ACROSOME REACTION
XP_006052702	VCL.1	vinculin isoform X4	ACROSOME	0	CAPACITATION, ACROSOME REACTION
XP_006052699	VCL.2	vinculin isoform X1	ACROSOME	0	CAPACITATION, ACROSOME REACTION
XP_006052701	VCL.3	vinculin isoform X3	ACROSOME	0	CAPACITATION, ACROSOME REACTION
XP_006064386	VCP	transitional endoplasmic reticulum ATPase	CYTOPLASM	0	MALE FERTILITY
XP_006052426	VIM	vimentin		0
XP_006053926	VRTN	vertnin		0
XP_025131416	XIRP2	xin actin-binding repeat-containing protein 2 isoform X1		0
XP_025144744	YBX1	nuclease-sensitive element-binding protein 1 isoform X1	GERM CELLS	0	SPERMATOGENESIS
XP_006043860	YOD1	ubiquitin thioesterase OTU1 isoform X1		0
XP_025133518	YOD1.1	ubiquitin thioesterase OTU1 isoform X2		0
XP_025119204	YWHAB	14-3-3 protein beta/alpha		0
XP_006079842	YWHAE	14-3-3 protein epsilon isoform X2	TESTIS, ACROSOME	0	SPERMATOGENESIS, MOTILITY, MALE FERTILITY
XP_006079841	YWHAE.1	14-3-3 protein epsilon isoform X1	TESTIS, ACROSOME	0	SPERMATOGENESIS, MOTILITY, MALE FERTILITY
XP_006057193	YWHAG	14-3-3 protein gamma		0
XP_025123087	YWHAH	14-3-3 protein eta isoform X1	TESTIS	0	SPERMATOGENESIS, MALE FERTILITY
XP_006051063	YWHAH.1	14-3-3 protein eta isoform X2	TESTIS	0	SPERMATOGENESIS, MALE FERTILITY
XP_006073847	YWHAQ	14-3-3 protein theta		0
XP_006046494	YWHAZ	14-3-3 protein zeta/delta		0
XP_025150226	ZC2HC1B	zinc finger C2HC domain-containing protein 1B		0
XP_025146598	ZPBP.1	zona pellucida-binding protein 1 isoform X8	ACROSOME	0	GAMETE INTERACTION
XP_025146594	ZPBP.3	zona pellucida-binding protein 1 isoform X4	ACROSOME	0	GAMETE INTERACTION
XP_025126200	A1BG	alpha-1B-glycoprotein isoform X2	SPP	Y	SPERM PROTECTION, IMMUNOMODULATION
XP_025126199	A1BG.1	alpha-1B-glycoprotein isoform X1	SPP	Y	SPERM PROTECTION, IMMUNOMODULATION
XP_006062551	ABO.1	histo-blood group ABO system transferase isoform X3	SPERM SURAFCE	Y	MALE FERTILITY
XP_025118199	ABO.4	histo-blood group ABO system transferase isoform X6	SPERM SURAFCE	Y	MALE FERTILITY
XP_025118200	ABO.5	histo-blood group ABO system transferase isoform X7	SPERM SURAFCE	Y	MALE FERTILITY
XP_006044896	ACACB	LOW QUALITY PROTEIN: acetyl-CoA carboxylase 2		Y
XP_025131209	ACHE	acetylcholinesterase isoform X4	ACROSOME, NECK, FLAGELLA	Y	MOTILITY
XP_006042478	ACP2	lysosomal acid phosphatase isoform X2		Y
XP_006042476	ACP2.1	lysosomal acid phosphatase isoform X1		Y
XP_025138352	ACR.1	acrosin isoform X1	ACROSOME	Y	ZP PENETRATION
XP_025138879	ACRBP	acrosin-binding protein isoform X2	SPERM PM	Y	ZP BINDING, SPERM MATURATION
XP_025138880	ACRBP.1	acrosin-binding protein isoform X3	SPERM PM	Y	ZP BINDING, SPERM MATURATION
XP_006065879	ACRBP.2	acrosin-binding protein isoform X1	SPERM PM	Y	ZP BINDING, SPERM MATURATION
XP_025142152	ACRV1	acrosomal protein SP-10	ACROSOME	Y	ZP PENETRATION
XP_025133994	ADAM2	LOW QUALITY PROTEIN: disintegrin and metalloproteinase domain-containing protein 2		Y
XP_025134019	ADAM32	LOW QUALITY PROTEIN: disintegrin and metalloproteinase domain-containing protein 32		Y
XP_006069596	ADAM7	disintegrin and metalloproteinase domain-containing protein 7 isoform X2	EPIDIDYMIS, SPERM PM	Y	GAMETE INTERACTION
XP_025137666	ADAM7.1	disintegrin and metalloproteinase domain-containing protein 7 isoform X1	EPIDIDYMIS, SPERM PM	Y	GAMETE INTERACTION
XP_006060284	ADAMTS19	A disintegrin and metalloproteinase with thrombospondin motifs 19	EPIDIDYMIS, SPERM PM	Y	GAMETE INTERACTION
XP_006066229	ADGRG6	adhesion G-protein coupled receptor G6 isoform X2	SPERM PM	Y	SPERMATOGENESIS
XP_006066230	ADGRG6.1	adhesion G-protein coupled receptor G6 isoform X3	SPERM PM	Y	SPERMATOGENESIS
XP_025150258	ADGRG6.3	adhesion G-protein coupled receptor G6 isoform X7	SPERM PM	Y	SPERMATOGENESIS
XP_025150256	ADGRG6.4	adhesion G-protein coupled receptor G6 isoform X5	SPERM PM	Y	SPERMATOGENESIS
XP_025150255	ADGRG6.5	adhesion G-protein coupled receptor G6 isoform X4	SPERM PM	Y	SPERMATOGENESIS
XP_006066228	ADGRG6.6	adhesion G-protein coupled receptor G6 isoform X1	SPERM PM	Y	SPERMATOGENESIS
XP_025122424	ADM	ADM isoform X2		Y
XP_025122423	ADM.1	ADM isoform X1		Y
XP_006072359	ADRM1	proteasomal ubiquitin receptor ADRM1 isoform X1	SPERM SURFACE	Y	CAPACITATION, ZP PENETRATION
XP_025119594	ADRM1.1	proteasomal ubiquitin receptor ADRM1 isoform X3	SPERM SURFACE	Y	CAPACITATION, ZP PENETRATION
XP_025119595	ADRM1.3	proteasomal ubiquitin receptor ADRM1 isoform X4	SPERM SURFACE	Y	CAPACITATION, ZP PENETRATION
XP_025145699	AFP	alpha-fetoprotein		Y
XP_006080636	AGA	N(4)-(beta-N-acetylglucosaminyl)-L-asparaginase		Y
XP_025141472	AGRN	LOW QUALITY PROTEIN: agrin		Y
XP_006065099	AGT	angiotensinogen		Y
XP_006058682	AHSG	alpha-2-HS-glycoprotein		Y
XP_006047011	ALB	serum albumin	SPP	Y	SPERM SURVIVAL
XP_006057351	ALDH9A1	4-trimethylaminobutyraldehyde dehydrogenase		Y
XP_006048607	ALPL	alkaline phosphatase, tissue-nonspecific isozyme isoform X1		Y
XP_025151784	ANG	angiogenin		Y
XP_006068840	APLP1	amyloid-like protein 1 isoform X2		Y
XP_006068839	APLP1.1	amyloid-like protein 1 isoform X1		Y
XP_006061741	APLP2	LOW QUALITY PROTEIN: amyloid-like protein 2		Y
XP_025122634	APOA1	apolipoprotein A-I isoform X1		Y
XP_025122635	APOA1.1	apolipoprotein A-I isoform X2	SPP	Y	MOTILITY, SPERM SURVIVAL
XP_006048532	APOA2	apolipoprotein A-II isoform X1	SPP	Y	SPERM PROTECTION
XP_025122633	APOA4	apolipoprotein A-IV		Y
XP_006067602	APOE	apolipoprotein E		Y
XP_006046329	APOH	beta-2-glycoprotein 1		Y
XP_025131670	APOO	MICOS complex subunit MIC26 isoform X1		Y
XP_006072245	APOO.1	MICOS complex subunit MIC26 isoform X2		Y
XP_025137757	APP	amyloid-beta A4 protein isoform X4	SPERM SURFACE	Y	MALE FERTILITY
XP_025137742	APP.1	amyloid-beta A4 protein isoform X1	SPERM SURFACE	Y	MALE FERTILITY
XP_025137753	APP.2	amyloid-beta A4 protein isoform X3	SPERM SURFACE	Y	MALE FERTILITY
XP_025137746	APP.3	amyloid-beta A4 protein isoform X2	SPERM SURFACE	Y	MALE FERTILITY
XP_025137776	APP.4	amyloid-beta A4 protein isoform X7	SPERM SURFACE	Y	MALE FERTILITY
XP_025137759	APP.5	amyloid-beta A4 protein isoform X5	SPERM SURFACE	Y	MALE FERTILITY
XP_025137769	APP.6	amyloid-beta A4 protein isoform X6	SPERM SURFACE	Y	MALE FERTILITY
XP_025145664	ART3.4	ecto-ADP-ribosyltransferase 3 isoform X4	TESTIS	Y	SPERMATOGENESIS, MALE FERTILITY
XP_006075049	ATP5F1B	ATP synthase subunit beta, mitochondrial	MITOCHONDRIA	Y	MALE FERTILITY
XP_025130733	AZGP1	zinc-alpha-2-glycoprotein isoform X2		Y
XP_006053677	AZGP1.1	zinc-alpha-2-glycoprotein isoform X1		Y
XP_025125065	BCAM	basal cell adhesion molecule isoform X2		Y
XP_006067608	BCAM.1	basal cell adhesion molecule isoform X1		Y
XP_025123304	BICDL1	BICD family-like cargo adapter 1 isoform X5		Y
XP_025123301	BICDL1.1	BICD family-like cargo adapter 1 isoform X3		Y
XP_025123302	BICDL1.2	BICD family-like cargo adapter 1 isoform X4		Y
XP_006053035	BICDL1.3	BICD family-like cargo adapter 1 isoform X2		Y
XP_025123300	BICDL1.4	BICD family-like cargo adapter 1 isoform X1		Y
XP_006052795	BSG	basigin		Y
XP_025149937	BTD	biotinidase isoform X1		Y
XP_006048789	BTD.1	biotinidase isoform X2		Y
XP_025122554	C1QTNF5	complement C1q tumor necrosis factor-related protein 5		Y
XP_006045164	C3	complement C3		Y
XP_025143669	C6H1orf56	protein MENT isoform X1		Y
XP_006058204	C6H1orf56.1	protein MENT isoform X2		Y
XP_006063582	C9	complement component C9		Y
XP_006041616	CALR	calreticulin		Y
XP_006074457	CALU	calumenin isoform X1	SPP	Y	FERTILIZATION
XP_025147270	CALU.1	calumenin isoform X2	SPP	Y	FERTILIZATION
NP_001277882	CATH	cathelicidin precursor		Y
XP_006059122	CCL22	C-C motif chemokine 22		Y
XP_025141130	CD46	membrane cofactor protein isoform X11	ACROSOME	Y	SPERM PROTECTION, MALE FERTILITY, IMMUNOMODULATION
XP_025141141	CD46.1	membrane cofactor protein isoform X18	ACROSOME	Y	SPERM PROTECTION, MALE FERTILITY, IMMUNOMODULATION
XP_025141122	CD46.10	membrane cofactor protein isoform X4	ACROSOME	Y	SPERM PROTECTION, MALE FERTILITY, IMMUNOMODULATION
XP_025141124	CD46.11	membrane cofactor protein isoform X5	ACROSOME	Y	SPERM PROTECTION, MALE FERTILITY, IMMUNOMODULATION
XP_025141149	CD46.12	membrane cofactor protein isoform X25	ACROSOME	Y	SPERM PROTECTION, MALE FERTILITY, IMMUNOMODULATION
XP_025141121	CD46.13	membrane cofactor protein isoform X3	ACROSOME	Y	SPERM PROTECTION, MALE FERTILITY, IMMUNOMODULATION
XP_025141146	CD46.14	membrane cofactor protein isoform X22	ACROSOME	Y	SPERM PROTECTION, MALE FERTILITY, IMMUNOMODULATION
XP_025141135	CD46.15	membrane cofactor protein isoform X14	ACROSOME	Y	SPERM PROTECTION, MALE FERTILITY, IMMUNOMODULATION
XP_025141126	CD46.16	membrane cofactor protein isoform X7	ACROSOME	Y	SPERM PROTECTION, MALE FERTILITY, IMMUNOMODULATION
XP_025141125	CD46.17	membrane cofactor protein isoform X6	ACROSOME	Y	SPERM PROTECTION, MALE FERTILITY, IMMUNOMODULATION
XP_025141127	CD46.18	membrane cofactor protein isoform X8	ACROSOME	Y	SPERM PROTECTION, MALE FERTILITY, IMMUNOMODULATION
XP_025141132	CD46.19	membrane cofactor protein isoform X13	ACROSOME	Y	SPERM PROTECTION, MALE FERTILITY, IMMUNOMODULATION
XP_025141144	CD46.2	membrane cofactor protein isoform X21	ACROSOME	Y	SPERM PROTECTION, MALE FERTILITY, IMMUNOMODULATION
XP_025141128	CD46.20	membrane cofactor protein isoform X9	ACROSOME	Y	SPERM PROTECTION, MALE FERTILITY, IMMUNOMODULATION
XP_025141129	CD46.21	membrane cofactor protein isoform X10	ACROSOME	Y	SPERM PROTECTION, MALE FERTILITY, IMMUNOMODULATION
XP_025141152	CD46.22	membrane cofactor protein isoform X28	ACROSOME	Y	SPERM PROTECTION, MALE FERTILITY, IMMUNOMODULATION
XP_025141131	CD46.23	membrane cofactor protein isoform X12	ACROSOME	Y	SPERM PROTECTION, MALE FERTILITY, IMMUNOMODULATION
XP_025141143	CD46.24	membrane cofactor protein isoform X20	ACROSOME	Y	SPERM PROTECTION, MALE FERTILITY, IMMUNOMODULATION
XP_025141153	CD46.25	membrane cofactor protein isoform X29	ACROSOME	Y	SPERM PROTECTION, MALE FERTILITY, IMMUNOMODULATION
XP_025141138	CD46.26	membrane cofactor protein isoform X16	ACROSOME	Y	SPERM PROTECTION, MALE FERTILITY, IMMUNOMODULATION
XP_025141147	CD46.27	membrane cofactor protein isoform X23	ACROSOME	Y	SPERM PROTECTION, MALE FERTILITY, IMMUNOMODULATION
XP_025141142	CD46.28	membrane cofactor protein isoform X19	ACROSOME	Y	SPERM PROTECTION, MALE FERTILITY, IMMUNOMODULATION
XP_025141120	CD46.3	membrane cofactor protein isoform X2	ACROSOME	Y	SPERM PROTECTION, MALE FERTILITY, IMMUNOMODULATION
XP_025141148	CD46.4	membrane cofactor protein isoform X24	ACROSOME	Y	SPERM PROTECTION, MALE FERTILITY, IMMUNOMODULATION
XP_025141140	CD46.5	membrane cofactor protein isoform X17	ACROSOME	Y	SPERM PROTECTION, MALE FERTILITY, IMMUNOMODULATION
XP_025141119	CD46.6	membrane cofactor protein isoform X1	ACROSOME	Y	SPERM PROTECTION, MALE FERTILITY, IMMUNOMODULATION
XP_025141136	CD46.7	membrane cofactor protein isoform X15	ACROSOME	Y	SPERM PROTECTION, MALE FERTILITY, IMMUNOMODULATION
XP_025141150	CD46.8	membrane cofactor protein isoform X26	ACROSOME	Y	SPERM PROTECTION, MALE FERTILITY, IMMUNOMODULATION
XP_025141151	CD46.9	membrane cofactor protein isoform X27	ACROSOME	Y	SPERM PROTECTION, MALE FERTILITY, IMMUNOMODULATION
XP_006062451	CD59	CD59 glycoprotein	SPERM SURFACE	Y	SPERM PROTECTION, IMMUNOMODULATION
XP_025143364	CD5L	CD5 antigen-like isoform X1	EPIDIDYMIS, SPERM SURFACE	Y	SPERM PROTECTION, IMMUNOMODULATION
XP_025143366	CD5L.1	CD5 antigen-like isoform X3	EPIDIDYMIS, SPERM SURFACE	Y	SPERM PROTECTION, IMMUNOMODULATION
XP_025143365	CD5L.2	CD5 antigen-like isoform X2	EPIDIDYMIS, SPERM SURFACE	Y	SPERM PROTECTION, IMMUNOMODULATION
XP_006047698	CDH1	cadherin-1	EPIDIDYMIS, SPERM HEAD	Y	ZP BINDING
XP_025129024	CDH2	cadherin-2	EPIDIDYMIS, SPERM HEAD	Y	ZP BINDING
XP_025124586	CES2	cocaine esterase isoform X1		Y
XP_006072144	CES2.1	cocaine esterase isoform X2		Y
XP_025124590	CES4A	carboxylesterase 4A isoform X3	EPIDIDYMIS	Y	SPERM MATURATION, MALE FERTILITY
XP_025124588	CES4A.1	carboxylesterase 4A isoform X1	EPIDIDYMIS	Y	SPERM MATURATION, MALE FERTILITY
XP_025124589	CES4A.2	carboxylesterase 4A isoform X2	EPIDIDYMIS	Y	SPERM MATURATION, MALE FERTILITY
XP_006053716	CES5A.1	carboxylesterase 5A isoform X1	EPIDIDYMIS, SPP, SPERM PM	Y	SPERM MATURATION, MOTILITY, CAPACITATION, MALE FERTILITY
XP_006053717	CES5A.2	carboxylesterase 5A isoform X3	EPIDIDYMIS, SPP, SPERM PM	Y	SPERM MATURATION, MOTILITY, CAPACITATION, MALE FERTILITY
XP_025124481	CES5A.3	carboxylesterase 5A isoform X2	EPIDIDYMIS, SPP, SPERM PM	Y	SPERM MATURATION, MOTILITY, CAPACITATION, MALE FERTILITY
XP_006041938	CFB	complement factor B		Y
XP_006052270	CFI	complement factor I		Y
XP_006077557	CLEC3B	tetranectin		Y
XP_025123873	CLGN	calmegin		Y
XP_006060322	CLU	clusterin	EPIDIDYMIS	Y	SPERM PROTECTION, SPERM MATURATION
XP_006075088	CNPY2	protein canopy homolog 2		Y
XP_006041214	COL1A1	collagen alpha-1(I) chain		Y
XP_006063186	CP	ceruloplasmin isoform X1	TESTIS, EPIDIDYMIS, SPP	Y	SPERMATOGENESIS, SPERM PROTECTION, SPERM MATURATION
XP_025145887	CP.1	ceruloplasmin isoform X3	TESTIS, EPIDIDYMIS, SPP	Y	SPERMATOGENESIS, SPERM PROTECTION, SPERM MATURATION
XP_025145881	CP.2	ceruloplasmin isoform X2	TESTIS, EPIDIDYMIS, SPP	Y	SPERMATOGENESIS, SPERM PROTECTION, SPERM MATURATION
XP_006059583	CPD	carboxypeptidase D		Y
XP_025120842	CPQ	carboxypeptidase Q isoform X1		Y
XP_025120843	CPQ.1	carboxypeptidase Q isoform X2		Y
XP_006050776	CRISP1	cysteine-rich secretory protein 1	EPIDIDYMIS	Y	SPERM MATURATION, CAPACITATION
XP_006050773	CRISP2	LOW QUALITY PROTEIN: cysteine-rich secretory protein 2		Y
XP_006061078	CRP	C-reactive protein		Y
XP_006061199	CRTAC1	cartilage acidic protein 1 isoform X1	SPP, SPERM SURFACE	Y	MALE FERTILITY
XP_025129676	CRTAC1.1	cartilage acidic protein 1 isoform X3	SPP, SPERM SURFACE	Y	MALE FERTILITY
XP_025129675	CRTAC1.2	cartilage acidic protein 1 isoform X2	SPP, SPERM SURFACE	Y	MALE FERTILITY
XP_025145745	CSN1S1	alpha-S1-casein isoform X3	SPERM PM	Y	GAMETE INTERACTION, ACROSOME REACTION, IMMUNOMODULATION
XP_025145744	CSN1S1.1	alpha-S1-casein isoform X1	SPERM PM	Y	GAMETE INTERACTION, ACROSOME REACTION, IMMUNOMODULATION
XP_006071187	CSN1S1.2	alpha-S1-casein isoform X2	SPERM PM	Y	GAMETE INTERACTION, ACROSOME REACTION, IMMUNOMODULATION
XP_006071188	CSN1S1.3	alpha-S1-casein isoform X7	SPERM PM	Y	GAMETE INTERACTION, ACROSOME REACTION, IMMUNOMODULATION
XP_025145746	CSN1S1.4	alpha-S1-casein isoform X4	SPERM PM	Y	GAMETE INTERACTION, ACROSOME REACTION, IMMUNOMODULATION
XP_025145747	CSN1S1.5	alpha-S1-casein isoform X5	SPERM PM	Y	GAMETE INTERACTION, ACROSOME REACTION, IMMUNOMODULATION
XP_025145753	CSN1S1.6	alpha-S1-casein isoform X12	SPERM PM	Y	GAMETE INTERACTION, ACROSOME REACTION, IMMUNOMODULATION
XP_025145748	CSN1S1.7	alpha-S1-casein isoform X6	SPERM PM	Y	GAMETE INTERACTION, ACROSOME REACTION, IMMUNOMODULATION
XP_025145749	CSN1S1.8	alpha-S1-casein isoform X8	SPERM PM	Y	GAMETE INTERACTION, ACROSOME REACTION, IMMUNOMODULATION
XP_006056492	CST6	cystatin-M		Y
XP_006060303	CTSB	cathepsin B isoform X1	EPIDIDYMIS, SPP	Y	MOTILITY, MALE FERTILITY
XP_006044419	CTSF	cathepsin F isoform X1	EPIDIDYMIS	Y	SPERM MATURATION, MALE FERTILITY
XP_006044420	CTSF.1	cathepsin F isoform X2	EPIDIDYMIS	Y	SPERM MATURATION, MALE FERTILITY
XP_006044080	CTSH	pro-cathepsin H isoform X2	EPIDIDYMIS	Y	SPERM MATURATION, MALE FERTILITY
XP_025127173	CTSH.1	pro-cathepsin H isoform X1	EPIDIDYMIS	Y	SPERM MATURATION, MALE FERTILITY
XP_006058190	CTSS	cathepsin S	EPIDIDYMIS	Y	SPERM MATURATION, MALE FERTILITY
XP_025137840	CTSV	cathepsin L2	EPIDIDYMIS	Y	SPERM MATURATION, MALE FERTILITY
XP_006050391	CUTA	protein CutA isoform X2		Y
XP_006050392	CUTA.1	protein CutA isoform X1		Y
XP_006080459	CUZD1	CUB and zona pellucida-like domain-containing protein 1		Y
XP_025128137	DAG1	dystroglycan		Y
XP_025119521	DEFB113	beta-defensin 113	EPIDIDYMIS	Y	SPERM MATURATION, SPERM PROTECTION
XP_025120496	DEFB115	beta-defensin 115	EPIDIDYMIS	Y	SPERM MATURATION, SPERM PROTECTION
XP_006060738	DEFB123	beta-defensin 123	EPIDIDYMIS	Y	SPERM MATURATION, SPERM PROTECTION, MALE FERTILITY
XP_006049642	DEFB129	beta-defensin 129	EPIDIDYMIS, SPERM SURFACE	Y	SPERM MATURATION, SPERM PROTECTION
XP_025129709	DMBT1	LOW QUALITY PROTEIN: deleted in malignant brain tumors 1 protein		Y
XP_006041443	DNASE1L3	deoxyribonuclease gamma		Y
XP_025131690	DPP4.2	dipeptidyl peptidase 4 isoform X1	PROSTASOMES	Y	MOTILITY
XP_025117958	DPP7	dipeptidyl peptidase 2 isoform X2	TESTIS, EPIDIDYMIS, ACROSOME	Y	ACROSOME REACTION
XP_006062602	DPP7.1	dipeptidyl peptidase 2 isoform X1	TESTIS, EPIDIDYMIS, ACROSOME	Y	ACROSOME REACTION
XP_006060963	EFNA1	ephrin-A1		Y
XP_025128865	EGFR	LOW QUALITY PROTEIN: epidermal growth factor receptor		Y
XP_006074799	EIF2AK3	LOW QUALITY PROTEIN: eukaryotic translation initiation factor 2-alpha kinase 3		Y
XP_025120748	ENPP2.2	ectonucleotide pyrophosphatase/phosphodiesterase family member 2 isoform X6	SPERM PM	Y	CAPACITATION
XP_025120745	ENPP2.9	ectonucleotide pyrophosphatase/phosphodiesterase family member 2 isoform X3	SPERM PM	Y	CAPACITATION
XP_025146909	EPDR1	mammalian ependymin-related protein 1		Y
XP_025137198	EQTN	equatorin isoform X4	SPERM HEAD	Y	GAMETE INTERACTION
XP_025137593	ERP44.1	endoplasmic reticulum resident protein 44 isoform X1		Y
XP_006056431	F5	coagulation factor V isoform X1		Y
XP_006056432	F5.1	coagulation factor V isoform X2		Y
XP_006077003	FAM3B	protein FAM3B isoform X1		Y
XP_006077004	FAM3B.1	protein FAM3B isoform X2		Y
XP_006049700	FAM3C	protein FAM3C		Y
XP_025138474	FBLN1	fibulin-1 isoform X2		Y
XP_025138473	FBLN1.1	fibulin-1 isoform X1		Y
XP_025124893	FCGBP	IgGFc-binding protein isoform X2		Y
[truncated: 369 more rows]
